# Supplementary material for: IL1 Receptor Antagonist Controls Transcriptional Signature of Inflammation in Patients with Metastatic Breast Cancer
Source: Oxford University Press journal article supplement (doi:10.1158/0008-5472.can-18-0413), 2018-07-16
Supplement: 00085472can180413-sup-196799_2_supp_4724479_p805rl.xlsx [file 00085472can180413-sup-196799_2_supp_4724479_p805rl.xlsx]

## Sheet: sampleanns_tcga_samples
	PATIENT_ID	Adjuvant.Postoperative.Pharmaceutical.Therapy.Administered.Indicator	American.Joint.Committee.on.Cancer.Publication.Version.Type	American.Joint.Committee.on.Cancer.Tumor.Stage.Code	American.Joint.Committee.on.Cancer.Metastasis.Stage.Code	Birth.from.Initial.Pathologic.Diagnosis.Date	Brachytherapy.first.reference.point.administered.total.dose	CNA	Days.to.Last.Followup	Days.to.Sample.Collection.	Death.from.Initial.Pathologic.Diagnosis.Date	Diagnosis.Age	Did.patient.start.adjuvant.postoperative.radiotherapy.	Disease.Free..Months.	Disease.Free.Status	Disease.Surgical.Margin.Status	Ethnicity.Category	First.Pathologic.Diagnosis.Biospecimen.Acquisition.Method.Type	First.Pathologic.Diagnosis.Biospecimen.Acquisition.Other.Method.Type	Form.completion.date	ICD.10.Classification	Informed.consent.verified	Initial.Patient.Weight	International.Classification.of.Diseases.for.Oncology..Third.Edition.ICD.O.3.Site.Code	International.Classification.of.Diseases.for.Oncology..Third.Edition.ICD.O.3.Histology.Code	Is.FFPE	Last.Alive.Less.Initial.Pathologic.Diagnosis.Date.Calculated.Day.Value	Lymph.Node.s..Examined.Number	Menopause.Status	Mutation.Count	Neoadjuvant.Therapy.Type.Administered.Prior.To.Resection.Text	Neoplasm.Disease.Lymph.Node.Stage.American.Joint.Committee.on.Cancer.Code	Neoplasm.Disease.Stage.American.Joint.Committee.on.Cancer.Code	New.Neoplasm.Event.Post.Initial.Therapy.Indicator	Oct.embedded	Other.Patient.ID	Other.Sample.ID	Overall.Survival.Status	Overall.Survival..Months.	Pathology.report.uuid	Patient.s.Vital.Status	Person.Gender	Person.Neoplasm.Status	Positive.Finding.Lymph.Node.Keratin.Immunohistochemistry.Staining.Method.Count	Positive.Finding.Lymph.Node.Hematoxylin.and.Eosin.Staining.Microscopy.Count	Primary.Lymph.Node.Presentation.Assessment.Ind.3	Prior.Cancer.Diagnosis.Occurence	Race.Category	Sample.Type
TCGA-A1-A0SB-01	TCGA-A1-A0SB		6th	T1c	M0	-25833		0.0008017	259	764	NA	70		8.51	DiseaseFree	Negative	NOT HISPANIC OR LATINO	Fine needle aspiration biopsy		2011-06-30	C50.9	YES	120	C50.9	8200/3	NO	0	YES	Post (prior bilateral ovariectomy OR >12 mo since LMP with no prior hysterectomy)	18	No	N0	Stage I		TRUE	0045349c-69d9-4306-a403-c9c1fa836644	f66358d4-9319-4c23-983d-ab5056daacf1	LIVING	8.51	BEC7EEA9-6DEA-4402-A3A1-07EF33D58174	Alive	FEMALE	TUMOR FREE	NA	0	2	No	WHITE	Primary Tumor
TCGA-A1-A0SD-01	TCGA-A1-A0SD		6th	T2	M0	-21793		0.247	437	1697	NA	59		14.4	DiseaseFree	Positive	NOT HISPANIC OR LATINO	Core needle biopsy		2011-09-07	C50.9	YES	50	C50.9	8500/3	NO	0	YES		30	No	N0	Stage IIA		TRUE	c462e422-eb8d-4daf-9897-2a9c6cbd783a	81f193d9-ad19-43c2-b89f-54003a8d133e	LIVING	14.4	DD89D265-9E20-49C2-93BD-666BE7D5E41B	Alive	FEMALE		0	0	3	No	WHITE	Primary Tumor
TCGA-A1-A0SE-01	TCGA-A1-A0SE		6th	T1c	M0	-20717		0.213	1321	1672	NA	56		43.4	DiseaseFree	Negative	NOT HISPANIC OR LATINO	Core needle biopsy		2010-12-06	C50.9	YES	90	C50.9	8522/3	NO	0		Pre (<6 months since LMP AND no prior bilateral ovariectomy AND not on estrogen replacement)	20	No	N0 (i-)	Stage I		TRUE	c397e6c2-ba3a-4f5e-a258-c140611192fe	2fd1998c-1ea4-42eb-84b9-db352da9cf25	LIVING	43.4	CFF567FC-8867-4CA4-85AE-81A7D30095E7	Alive	FEMALE	TUMOR FREE	NA	0	8	No	WHITE	Primary Tumor
TCGA-A1-A0SF-01	TCGA-A1-A0SF		6th	T2	M0	-19731		0.202	1463	1648	NA	54		48.1	DiseaseFree	Negative	NOT HISPANIC OR LATINO	Fine needle aspiration biopsy		2011-05-24	C50.9	YES	190	C50.9	8500/3	NO	0	YES	Pre (<6 months since LMP AND no prior bilateral ovariectomy AND not on estrogen replacement)	38	No	N0	Stage IIA		TRUE	4b620966-b4c7-4615-bf58-ca9d3226b9bd	f4d51ca6-89a6-4571-ae8d-0fad7dde4452	LIVING	48.1	1617B36B-4EFB-445E-95BC-E63B129AAAE7	Alive	FEMALE	TUMOR FREE	NA	0	2	No	WHITE	Primary Tumor
TCGA-A1-A0SG-01	TCGA-A1-A0SG		6th	T2	M0	-22380		0.0969	434	1581	NA	61		14.3	DiseaseFree	Negative	NOT HISPANIC OR LATINO	Core needle biopsy		2011-05-31	C50.9	YES	120	C50.9	8507/3	NO	0	YES	Post (prior bilateral ovariectomy OR >12 mo since LMP with no prior hysterectomy)	32	No	N1a	Stage IIB		TRUE	0ed9ad26-7fdc-4d75-93f9-d029eee94993	6bfd7e43-77e4-4666-9b28-c5d4cdcd6ad7	LIVING	14.3	89A67051-898A-4E2A-A874-E0165F274E63	Alive	FEMALE		NA	1	11	No	WHITE	Primary Tumor
TCGA-A1-A0SH-01	TCGA-A1-A0SH		6th	T2	M0	-14595		0.179	1437	1305	NA	39		47.2	DiseaseFree	Negative	NOT HISPANIC OR LATINO	Fine needle aspiration biopsy		2010-12-06	C50.9	YES	240	C50.9	8500/3	NO	0		Pre (<6 months since LMP AND no prior bilateral ovariectomy AND not on estrogen replacement)	78	No	N0 (i-)	Stage IIA		TRUE	a6a863d9-b39d-4965-b47f-79a1bcf3c976	08044da0-8cb7-4bf7-bbb6-b80be4fddd8c	LIVING	47.2	1FB1255E-D9EC-4FE9-BE96-F81271FCCFB6	Alive	FEMALE	TUMOR FREE	NA	0	2	No	WHITE	Primary Tumor
TCGA-A1-A0SI-01	TCGA-A1-A0SI		6th	T2	M0	-19250		0.331	635	1267	NA	52		20.9	DiseaseFree	Negative	NOT HISPANIC OR LATINO	Fine needle aspiration biopsy		2011-06-30	C50.9	YES	40	C50.9	8500/3	NO	0	YES		166	No	N1a	Stage IIB		TRUE	16368c32-2118-4fcf-8693-6c89995e49d8	c5181ae5-bd05-459f-920d-26bd31bd9088	LIVING	20.9	4CD6BDB7-9629-41C6-8514-7661E3D33A66	Alive	FEMALE	TUMOR FREE	NA	1	23	No	WHITE	Primary Tumor
TCGA-A1-A0SJ-01	TCGA-A1-A0SJ		6th	T3	M0	-14383		0.46	416	1399	NA	39		13.7	DiseaseFree	Negative	NOT HISPANIC OR LATINO	Core needle biopsy		2010-12-06	C50.9	YES	140	C50.9	8500/3	NO	0			29	No	N1a	Stage IIIA		TRUE	a2db9dd1-44d5-48b5-817c-a21a85fadb21	9ec60572-39e4-4a0d-b157-cf0ec726fb1d	LIVING	13.7	0C0EEC9F-A715-4769-B58C-99D06C3C91F3	Alive	FEMALE	TUMOR FREE	NA	3	19	No	BLACK OR AFRICAN AMERICAN	Primary Tumor
TCGA-A1-A0SK-01	TCGA-A1-A0SK		6th	T2	M0	-20048		0.416	NA	1164	967	54		NA		Positive	NOT HISPANIC OR LATINO	Excisional Biopsy		2010-12-06	C50.9	YES	160	C50.9	8013/3	NO	0		Indeterminate (neither Pre or Postmenopausal)	101	No	N0 (i-)	Stage IIA		TRUE	a5b44d66-c162-46b5-9df2-86305f0385c5	dbd8fda0-bdf2-40f0-80b6-daef5ebf9c97	DECEASED	31.8	13302EC6-6511-42FE-AA8B-C875B5384FFE	Dead	FEMALE		NA	0	4	No	ASIAN	Primary Tumor
TCGA-A1-A0SM-01	TCGA-A1-A0SM		6th	T2	M0	-28198		0.181	242	1115	NA	77		7.95	DiseaseFree	Negative	NOT HISPANIC OR LATINO	Core needle biopsy		2010-12-06	C50.9	YES	120	C50.9	8500/3	NO	0			22	No	N0 (i-)	Stage IIA		TRUE	784de7ac-8424-42eb-83d4-a1bebaa42b97	289f5433-4834-401f-9361-efc8e883e630	LIVING	7.95	4F047F5B-EF3A-4590-8E7A-D90A52860324	Alive	MALE	TUMOR FREE	NA	0	3	No	WHITE	Primary Tumor
TCGA-A1-A0SN-01	TCGA-A1-A0SN		6th	T1c	MX	-18401		0.552	1196	1091	NA	50		39.3	DiseaseFree	Negative	NOT HISPANIC OR LATINO	Core needle biopsy		2011-05-23	C50.9	YES	120	C50.9	8500/3	NO	0	YES	Post (prior bilateral ovariectomy OR >12 mo since LMP with no prior hysterectomy)	45	No	N1	Stage IIA		TRUE	0dc337fa-da8b-42c4-b9a7-fb76d81c161f	62d2a36e-feb1-4084-8111-7ea38a4e3049	LIVING	39.3	D0269758-EFAE-4EBA-8CCF-4A6CF4D4B35A	Alive	FEMALE	TUMOR FREE	NA	4	13	No	WHITE	Primary Tumor
TCGA-A1-A0SO-01	TCGA-A1-A0SO		6th	T2	M0	-24826		0.77	852	1057	NA	67		28	DiseaseFree	Negative	NOT HISPANIC OR LATINO	Core needle biopsy		2010-12-06	C50.9	YES	210	C50.9	8500/3	NO	0		Post (prior bilateral ovariectomy OR >12 mo since LMP with no prior hysterectomy)	159	No	N1	Stage IIB		TRUE	6644fd4e-d2fe-4785-a73c-0f36fcc740e2	710257f0-ac05-4fee-b6a3-9c48ecc65b0e	LIVING	28	6104F94F-BA8F-4435-A839-E1FEA6EFFDF3	Alive	FEMALE	TUMOR FREE	NA	1	9	No	WHITE	Primary Tumor
TCGA-A1-A0SP-01	TCGA-A1-A0SP		6th	T2	M0	-14954		0.392	584	958	NA	40		19.2	DiseaseFree	Negative	NOT HISPANIC OR LATINO	Fine needle aspiration biopsy		2010-12-06	C50.9	YES	40	C50.9	8500/3	NO	0			41		N0 (i-)	Stage IIA		TRUE	a9bb8159-32f0-454c-a946-b3286a52b9d5	c0c04ba3-7fdf-47f3-8750-a487639a76df	LIVING	19.2	01992912-611F-4AA8-8570-B062CBCCAF70	Alive	FEMALE	TUMOR FREE	NA	0	3	Yes		Primary Tumor
TCGA-A1-A0SQ-01	TCGA-A1-A0SQ		6th	T2	MX	-16458		0.109	554	967	NA	45		18.2	DiseaseFree	Negative	NOT HISPANIC OR LATINO	Core needle biopsy		2011-06-30	C50.9	YES	200	C50.9	8500/3	NO	0	YES	Pre (<6 months since LMP AND no prior bilateral ovariectomy AND not on estrogen replacement)	26	No	N1	Stage IIB		TRUE	08de63a2-7b76-43c3-80dc-df748b1d81bc	58d073a2-68b8-4f48-ba5e-020258abef71	LIVING	18.2	92EE56BF-AAA0-438E-9244-780DBB2D9835	Alive	FEMALE	TUMOR FREE	NA	1	15	No	WHITE	Primary Tumor
TCGA-A2-A04N-01	TCGA-A2-A04N			T1c	M0	-24155		0.0862	3153	2850	NA	66		105	DiseaseFree	Negative	HISPANIC OR LATINO	Fine needle aspiration biopsy		2011-01-27	C50.9	YES	130	C50.9	8500/3	NO	0		Post (prior bilateral ovariectomy OR >12 mo since LMP with no prior hysterectomy)	37	No	N0 (i-)	Stage IA		TRUE	197428f7-bd77-4c5f-8119-87157b5c35b9	b8c9196c-182d-4522-b487-734f9a8f9a78	LIVING	105	45B4B99C-80E6-4AF4-8692-F7EE19D0467A	Alive	FEMALE	TUMOR FREE	0	0	6	No	WHITE	Primary Tumor
TCGA-A2-A04P-01	TCGA-A2-A04P			T2	M0	-13238		0.641	NA	2623	548	36		5.91	Recurred/Progressed	Positive		Excisional Biopsy		2010-08-26	C50.9	YES	250	C50.9	8500/3	NO	0		Pre (<6 months since LMP AND no prior bilateral ovariectomy AND not on estrogen replacement)	102	No	N3c	Stage IIIC		TRUE	ccd4a24b-d8cc-4686-9dee-c98b0c5a8d21	e4dee88b-58d0-4953-ad4a-a2df876f3c95	DECEASED	18	0E4B0EA9-14D1-4A82-814D-51CC2B9BA2B5	Dead	FEMALE	WITH TUMOR	0	18	20	No	BLACK OR AFRICAN AMERICAN	Primary Tumor
TCGA-A2-A04Q-01	TCGA-A2-A04Q			T1	M0	-17660		0.0853	1276	2260	NA	48		78.3	DiseaseFree	Negative		Other method, specify:	SKIN BIOPSY	2010-08-10	C50.9	YES	230	C50.9	8500/3	NO	0		Post (prior bilateral ovariectomy OR >12 mo since LMP with no prior hysterectomy)	19	No	N0 (i-)	Stage IA		TRUE	b5fba77b-1f50-4e71-95b2-566afba4bdd7	e17e273d-6f53-4419-9f0c-1e4e667c5257	LIVING	78.3	726B60CA-1B1C-440D-82FA-A4C978C4D484	Alive	FEMALE	TUMOR FREE	0	0	3	No	WHITE	Primary Tumor
TCGA-A2-A04R-01	TCGA-A2-A04R			T1	M0	-13483		0.264	2365	2233	NA	36		82.1	DiseaseFree	Negative	NOT HISPANIC OR LATINO	Core needle biopsy		2010-10-08	C50.9	YES	160	C50.9	8500/3	NO	0		Pre (<6 months since LMP AND no prior bilateral ovariectomy AND not on estrogen replacement)	69	No	N0 (i-)	Stage IA		TRUE	f3a058b9-fb7f-4098-8f0e-83c2acfa1ed5	e29fc4e1-4c82-46d7-997c-be59470c7751	LIVING	82.1	6A97C809-91BB-4E35-9E12-F5F2A58C9D35	Alive	FEMALE	TUMOR FREE	0	0	1	No	BLACK OR AFRICAN AMERICAN	Primary Tumor
TCGA-A2-A04T-01	TCGA-A2-A04T			T2	M0	-22707		0.694	1950	1979	NA	62		73.8	DiseaseFree	Negative		Core needle biopsy		2010-08-09	C50.9	YES	200	C50.9	8500/3	NO	0		Post (prior bilateral ovariectomy OR >12 mo since LMP with no prior hysterectomy)	81	No	N0 (i-)	Stage IIA		TRUE	b58ad350-5140-4fa8-bc2c-24bca8395f3a	6dd4870f-1ec2-484b-8703-6397d8e67daa	LIVING	73.8	24D42292-B875-4FAF-8C3A-9834414C3A01	Alive	FEMALE	TUMOR FREE	0	0	3	No	WHITE	Primary Tumor
TCGA-A2-A04U-01	TCGA-A2-A04U			T2	M0	-17474		0.668	671	1924	NA	47		48.8	DiseaseFree	Negative	NOT HISPANIC OR LATINO	Core needle biopsy		2011-01-05	C50.9	YES	170	C50.9	8500/3	NO	0		Peri (6-12 months since last menstrual period)	48	No	N0 (i+)	Stage IIA		TRUE	1c3610f7-e0aa-48d7-9a27-0dbaf6e244f9	e1df2e78-ade5-4ff7-a636-95c79e23b942	LIVING	48.8	B14456B1-4992-492D-AFB5-4F975F20A277	Alive	FEMALE		1	0	3	No	WHITE	Primary Tumor
TCGA-A2-A04V-01	TCGA-A2-A04V			T2	M0	-14250		0.113	NA	1812	1920	39		48.3	Recurred/Progressed	Negative	NOT HISPANIC OR LATINO	Core needle biopsy		2010-08-10	C50.9	YES	200	C50.9	8500/3	NO	0		Pre (<6 months since LMP AND no prior bilateral ovariectomy AND not on estrogen replacement)	28	No	N0 (i-)	Stage IIA		TRUE	64f67506-f2df-4f0a-b7be-29b4949e986a	5dfab1d0-fed6-47b2-a47d-402e088361ad	DECEASED	63.1	7D84A145-19AF-48D0-A5D9-F5724068CB26	Dead	FEMALE	WITH TUMOR	0	0	2	No	WHITE	Primary Tumor
TCGA-A2-A04W-01	TCGA-A2-A04W			T2	M0	-18345		0.107	1918	1630	NA	50		64	DiseaseFree	Negative	NOT HISPANIC OR LATINO	Core needle biopsy		2011-01-05	C50.9	YES	420	C50.9	8401/3	NO	0		Pre (<6 months since LMP AND no prior bilateral ovariectomy AND not on estrogen replacement)	101	No	N1mi	Stage IIB		TRUE	00807dae-9f4a-4fd1-aac2-82eb11bf2afb	699d9e14-0968-4773-b077-17db941f5c38	LIVING	64	84CA9DDD-36CA-466E-A74C-C7FB03E7C9E4	Alive	FEMALE	TUMOR FREE	NA	1	19	No	WHITE	Primary Tumor
TCGA-A2-A04X-01	TCGA-A2-A04X			T2	M0	-12642		0.243	1349	1390	NA	34		55.4	DiseaseFree	Negative		Core needle biopsy		2010-08-09	C50.9	YES	180	C50.9	8500/3	NO	0		Pre (<6 months since LMP AND no prior bilateral ovariectomy AND not on estrogen replacement)	23	No	N0 (i-)	Stage IIA		TRUE	733a2a0f-b37a-4b81-b49e-3c0f30d1eb37	abff5667-7ef4-46c1-ad34-ceabc27e7992	LIVING	55.4	F114D078-5F03-47F8-82AE-B8A21C2F9D31	Alive	FEMALE	TUMOR FREE	0	0	3	No	WHITE	Primary Tumor
TCGA-A2-A04Y-01	TCGA-A2-A04Y			T2	M0	-19533		0.147	764	756	NA	53		36.1	DiseaseFree	Negative		Core needle biopsy		2010-08-09	C50.9	YES	220	C50.9	8500/3	NO	0		Post (prior bilateral ovariectomy OR >12 mo since LMP with no prior hysterectomy)	49	No	N1mi	Stage IIB		TRUE	9ce7ce09-4409-4fa3-9f78-b2b24716f860	7cd3890a-bac7-42d0-a615-4b0f862200b8	LIVING	36.1	E4F7064C-9D81-49B5-9992-898155B3F11E	Alive	FEMALE	TUMOR FREE	0	1	13	No	WHITE	Primary Tumor
TCGA-A2-A0CK-01	TCGA-A2-A0CK		7th	T3	M0	-22094		0.101	3820	3080	NA	60		125	DiseaseFree	Positive	NOT HISPANIC OR LATINO	Excisional Biopsy		2012-05-21	C50.9	YES	230	C50.9	8520/3	NO	0	YES	Post (prior bilateral ovariectomy OR >12 mo since LMP with no prior hysterectomy)	13	No	N2a	Stage IIIA		TRUE	5ACA16CA-4516-4E27-8249-6914029A7EBF	D22E0F16-8D28-467D-AB10-2DD72F7EAB42	LIVING	125	B065FC65-CD33-4878-AE2C-7E8C04F5ECAB	Alive	FEMALE	TUMOR FREE	NA	4	20	No	WHITE	Primary Tumor
TCGA-A2-A0CL-01	TCGA-A2-A0CL			T3	M0	-13556		0.0591	1827	1552	NA	37		64.5	DiseaseFree	Positive	NOT HISPANIC OR LATINO	Core needle biopsy		2011-01-28	C50.9	YES	230	C50.9	8500/3	NO	0		Pre (<6 months since LMP AND no prior bilateral ovariectomy AND not on estrogen replacement)	36	No	N2a	Stage IIIA		TRUE	5c8983f2-9788-4dfa-971c-3ec457b6166e	73cb9fe3-e820-42ef-af60-acbf07ed9f1d	LIVING	64.5	17950062-E052-4FC2-A437-A17669B4DD01	Alive	FEMALE	TUMOR FREE	0	9	14	No	BLACK OR AFRICAN AMERICAN	Primary Tumor
TCGA-A2-A0CM-01	TCGA-A2-A0CM			T2	M0	-14969		0.393	NA	2546	754	40		12.6	Recurred/Progressed	Negative	NOT HISPANIC OR LATINO	Excisional Biopsy		2010-09-06	C50.9	YES	300	C50.9	8500/3	NO	0		Pre (<6 months since LMP AND no prior bilateral ovariectomy AND not on estrogen replacement)	50	No	N0 (i-)	Stage IIA		TRUE	eb2dbb4f-66b6-4525-8323-431970f7a64e	ea7fb858-c17b-40d4-9a22-cbd9da614b65	DECEASED	24.8	2972AB07-2C29-43B8-96DA-1386C5E248EB	Dead	FEMALE	WITH TUMOR	0	0	1	No	BLACK OR AFRICAN AMERICAN	Primary Tumor
TCGA-A2-A0CO-01	TCGA-A2-A0CO		7th	T3	M0	-31404		0.133	3409	2709	NA	85		NA		Positive	NOT HISPANIC OR LATINO	Core needle biopsy		2012-05-21	C50.9	YES	260	C50.9	8520/3	NO	0	YES	Post (prior bilateral ovariectomy OR >12 mo since LMP with no prior hysterectomy)	22	No	N0	Stage IIB		TRUE	8E54232D-D8BB-4612-8B0E-4FEB076A60F9	9BC1887E-B3ED-4732-B8BC-EF4F4EA59258	DECEASED	115	8C440009-E05E-4046-96AB-BAB211CB7D02	Dead	FEMALE	TUMOR FREE	0	0	11	No	WHITE	Primary Tumor
TCGA-A2-A0CP-01	TCGA-A2-A0CP			T1c	M0	-22133		0.087	2495	2445	NA	60		92.4	DiseaseFree	Negative	NOT HISPANIC OR LATINO	Core needle biopsy		2010-09-08	C50.9	YES	160	C50.9	8500/3	NO	0		Post (prior bilateral ovariectomy OR >12 mo since LMP with no prior hysterectomy)	78	No	N0 (i-)	Stage IA		TRUE	fe15c48b-116d-461e-9b40-68514730fd18	80105f2a-438a-4d44-947d-3f5a50d6cab0	LIVING	92.4	DAB9A2B8-FCE7-4FF4-BAC4-4D2A04D7A43B	Alive	FEMALE	TUMOR FREE	0	0	2	No	WHITE	Primary Tumor
TCGA-A2-A0CQ-01	TCGA-A2-A0CQ			T1	M0	-22810		0.12	2393	2310	NA	62		88.5	DiseaseFree	Positive	NOT HISPANIC OR LATINO	Core needle biopsy		2010-08-10	C50.9	YES	210	C50.9	8500/3	NO	0		Post (prior bilateral ovariectomy OR >12 mo since LMP with no prior hysterectomy)	32	No	N0 (i-)	Stage IA		TRUE	ab34a9a2-d72d-4106-94fb-118844b1b60b	28d6a08d-f73d-4981-882c-aac092fdebb9	LIVING	88.5	964DFAC8-91EC-4C0E-B499-3ED5F2D70096	Alive	FEMALE	TUMOR FREE	0	0	1	No	BLACK OR AFRICAN AMERICAN	Primary Tumor
TCGA-A2-A0CS-01	TCGA-A2-A0CS			T4b	M1	-26817		0.197	2298	2030	NA	73		75.5	DiseaseFree	Positive	NOT HISPANIC OR LATINO	Other method, specify:	Skin biopsy	2011-01-27	C50.9	YES	220	C50.9	8500/3	NO	0		Post (prior bilateral ovariectomy OR >12 mo since LMP with no prior hysterectomy)	33	No	N3a	Stage IV		TRUE	d071c16b-7cee-45ed-8ec9-612418143815	54fffa7d-7d20-4ce4-8fe0-29372a6f3c82	LIVING	75.5	A985FB5C-9E91-40E1-864E-CEA887B3866D	Alive	FEMALE	TUMOR FREE	0	12	15	No	WHITE	Primary Tumor
TCGA-A2-A0CT-01	TCGA-A2-A0CT			T2	M0	-25959		0.706	1918	1931	NA	71		75.2	DiseaseFree	Negative	NOT HISPANIC OR LATINO	Core needle biopsy		2010-09-09	C50.9	YES	190	C50.9	8500/3	NO	0		Post (prior bilateral ovariectomy OR >12 mo since LMP with no prior hysterectomy)	61	No	N0 (i-)	Stage IIA		TRUE	378778d2-b331-4867-a93b-c64028c8b4c7	3490858a-b2ef-4700-91ea-5e71c71cff67	LIVING	75.2	FDF38AA6-DC65-4043-8277-71BAE47902B1	Alive	FEMALE	TUMOR FREE	0	0	2	No	WHITE	Primary Tumor
TCGA-A2-A0CU-01	TCGA-A2-A0CU			T2	M0	-26823		0.439	NA	1911	158	73		NA		Close	NOT HISPANIC OR LATINO	Core needle biopsy		2010-09-09	C50.9	YES	190	C50.9	8500/3	NO	0		Post (prior bilateral ovariectomy OR >12 mo since LMP with no prior hysterectomy)	45	No	N0 (i+)	Stage IIA		TRUE	332423a7-8866-4ee3-b08f-3c8d7c16af80	df545b98-f81f-4e0d-a714-90b406f2a238	DECEASED	5.19	D503E73D-8B94-46A0-A24F-93069A56DC7D	Dead	FEMALE	TUMOR FREE	1	0	1	No	WHITE	Primary Tumor
TCGA-A2-A0CV-01	TCGA-A2-A0CV			T2	M0	-15289		0.614	1870	1574	NA	41		63.4	DiseaseFree	Negative	NOT HISPANIC OR LATINO	Core needle biopsy		2011-01-28	C50.9	YES	310	C50.9	8500/3	NO	0		Post (prior bilateral ovariectomy OR >12 mo since LMP with no prior hysterectomy)	21	No	N1a	Stage IIB		TRUE	ad7fcc89-82a3-48aa-8461-581c1a857677	bb83d6d7-e5e4-49cb-a533-bdf2fb330bae	LIVING	63.4	FBDDD9EE-0A5C-4CAB-9EB3-48B6431A9A84	Alive	FEMALE	TUMOR FREE	0	4	18	No	ASIAN	Primary Tumor
TCGA-A2-A0CW-01	TCGA-A2-A0CW			T2	M0	-24541		0.308	1750	1533	NA	67		64	DiseaseFree	Negative	NOT HISPANIC OR LATINO	Core needle biopsy		2011-01-28	C50.9	YES	290	C50.9	8500/3	NO	0		Post (prior bilateral ovariectomy OR >12 mo since LMP with no prior hysterectomy)	55	No	N1a	Stage IIB		TRUE	32efa6e8-6b19-480a-9d04-ace02e93318a	9cd3fc34-5380-4318-87fa-ccff0dbea879	LIVING	64	7D1C2CD8-9842-48AC-BB16-897E2A45B88D	Alive	FEMALE	TUMOR FREE	0	2	19	No	WHITE	Primary Tumor
TCGA-A2-A0CX-01	TCGA-A2-A0CX			T2	M0	-19152		0.359	1303	1316	NA	52		56.8	DiseaseFree	Negative	NOT HISPANIC OR LATINO	Core needle biopsy		2010-09-10	C50.9	YES	560	C50.9	8500/3	NO	0		Pre (<6 months since LMP AND no prior bilateral ovariectomy AND not on estrogen replacement)	188	No	N0 (i-)	Stage IIA		TRUE	c744fc13-3aca-4245-9e24-abd368cc8bef	d3c85f76-56ed-4f64-9edb-9cdf80526e33	LIVING	56.8	28AFD5DD-B607-4837-819F-688C9218ED06	Alive	FEMALE	TUMOR FREE	0	0	2	No	WHITE	Primary Tumor
TCGA-A2-A0D0-01	TCGA-A2-A0D0			T2	M0	-22115		0.706	643	720	NA	60		21.1	DiseaseFree	Negative	NOT HISPANIC OR LATINO	Core needle biopsy		2010-09-16	C50.9	YES	500	C50.9	8500/3	NO	0		Post (prior bilateral ovariectomy OR >12 mo since LMP with no prior hysterectomy)	63	No	N0 (i-)	Stage IIA		TRUE	324bcba2-f6a4-45a6-807c-215bdffcca21	7fd5702e-2d7b-4b79-b2d8-5ca4ca33cf65	LIVING	21.1	D8B44020-EC34-4788-B7FB-790B9C12D886	Alive	FEMALE	TUMOR FREE	0	0	8	No	BLACK OR AFRICAN AMERICAN	Primary Tumor
TCGA-A2-A0D1-01	TCGA-A2-A0D1			T2	M0	-28084		0.261	786	637	NA	76		34.5	DiseaseFree	Negative	NOT HISPANIC OR LATINO	Core needle biopsy		2010-09-21	C50.9	YES	340	C50.9	8500/3	NO	0		Post (prior bilateral ovariectomy OR >12 mo since LMP with no prior hysterectomy)	55	No	N0 (i-)	Stage IIA		TRUE	084c6aec-94f7-4090-8f3f-59fa9e89721a	12ece355-f1d0-446c-84e9-0aed3e6d29f8	LIVING	34.5	5DFA7970-3F68-4FC3-B2BA-5A42E866ECC3	Alive	FEMALE	TUMOR FREE	0	0	2	No	WHITE	Primary Tumor
TCGA-A2-A0D2-01	TCGA-A2-A0D2			T2	M0	-16623		0.502	761	614	NA	45		33.7	DiseaseFree	Negative	NOT HISPANIC OR LATINO	Core needle biopsy		2010-09-16	C50.9	YES	330	C50.9	8500/3	NO	0		Pre (<6 months since LMP AND no prior bilateral ovariectomy AND not on estrogen replacement)	77	No	N0 (i+)	Stage IIA		TRUE	99e32c59-aa73-43fa-88c9-399ddadb2c72	72439e36-3c17-4a90-b3e1-8f6ccfd3dcd4	LIVING	33.7	B0DE3388-7826-40D3-ADEE-0B25FE201F4A	Alive	FEMALE	TUMOR FREE	4	0	5	No	WHITE	Primary Tumor
TCGA-A2-A0D3-01	TCGA-A2-A0D3			T1c	M0	-15524		0.111	736	545	NA	42		28.8	DiseaseFree	Negative	NOT HISPANIC OR LATINO	Core needle biopsy		2011-01-28	C50.9	YES	420	C50.9	8500/3	NO	0		Post (prior bilateral ovariectomy OR >12 mo since LMP with no prior hysterectomy)	21	No	N0 (i-)	Stage IA		TRUE	4a16429b-884f-4c95-8683-feeedf0d6a55	f71ea58f-a4b4-464c-a276-92747efcc0b9	LIVING	28.8	5C563F73-3793-4902-ACBB-82F432AED592	Alive	FEMALE	TUMOR FREE	0	0	1	No	WHITE	Primary Tumor
TCGA-A2-A0D4-01	TCGA-A2-A0D4			T2	M0	-13805		0.386	496	384	NA	37		25.2	DiseaseFree	Negative	NOT HISPANIC OR LATINO	Core needle biopsy		2010-09-21	C50.9	YES	220	C50.9	8500/3	NO	0		Pre (<6 months since LMP AND no prior bilateral ovariectomy AND not on estrogen replacement)	29	No	N1a	Stage IIB		TRUE	75113445-d2d6-44a0-866c-c9175e6d214b	ace39ef3-1b5e-4ad2-a20d-62957e524281	LIVING	25.2	990F5885-8EDD-42A2-AEFE-9DEE3E95A0B1	Alive	FEMALE	TUMOR FREE	0	1	23	No	BLACK OR AFRICAN AMERICAN	Primary Tumor
TCGA-A2-A0EM-01	TCGA-A2-A0EM			T1	M0	-26845		0.102	2758	2696	NA	73		102	DiseaseFree	Negative	NOT HISPANIC OR LATINO	Core needle biopsy		2010-09-06	C50.9	YES	20	C50.9	8500/3	NO	0		Post (prior bilateral ovariectomy OR >12 mo since LMP with no prior hysterectomy)	27	No	N0 (i-)	Stage IA		TRUE	2fdfd287-d13c-4910-9788-73987d45908a	0d9139aa-d829-4ac9-8a65-822dcf79971c	LIVING	102	454CB5E9-3778-4666-9CED-913E08CB3615	Alive	FEMALE	TUMOR FREE	0	0	1	No	WHITE	Primary Tumor
TCGA-A2-A0EN-01	TCGA-A2-A0EN			T2	M0	-25771		0.221	2516	2348	NA	70		89.3	DiseaseFree	Negative	NOT HISPANIC OR LATINO	Excisional Biopsy		2010-10-08	C50.9	YES	110	C50.9	8520/3	NO	0		Post (prior bilateral ovariectomy OR >12 mo since LMP with no prior hysterectomy)	30	No	N0 (i+)	Stage IIA		TRUE	5e670fec-8992-44bf-8657-f7f9a272306b	c59fa5bd-0b6d-41d5-83ef-7766f0241d70	LIVING	89.3	8169AA00-E396-4A3E-A91C-F67B1F0B8E3E	Alive	FEMALE	TUMOR FREE	1	0	4	No	WHITE	Primary Tumor
TCGA-A2-A0EO-01	TCGA-A2-A0EO			T1	M0	-19880		0.251	2181	2331	NA	54		80.2	DiseaseFree	Close	NOT HISPANIC OR LATINO	Core needle biopsy		2010-08-10	C50.9	YES	200	C50.9	8500/3	NO	0		Peri (6-12 months since last menstrual period)	30	No	N0 (i-)	Stage IA		TRUE	bf88ddf5-a6d4-498c-bf7f-db9bfabff72d	bd7e34c8-d477-4caf-a44d-aa9a3a4bf7d4	LIVING	80.2	61BC91AE-CD06-432D-BCBA-6FAE2209C610	Alive	FEMALE	TUMOR FREE	0	0	3	No	WHITE	Primary Tumor
TCGA-A2-A0EQ-01	TCGA-A2-A0EQ			T2	M0	-23543		0.254	2053	2038	NA	64		79.7	DiseaseFree	Positive	NOT HISPANIC OR LATINO	Core needle biopsy		2010-08-11	C50.9	YES	600	C50.9	8500/3	NO	0		Post (prior bilateral ovariectomy OR >12 mo since LMP with no prior hysterectomy)	101	No	N0 (i-)	Stage IIA		TRUE	2192c1db-4718-4254-ba42-3ae7f30ad5a8	63792ecf-4f55-4eb5-bfbc-78accb4f104a	LIVING	79.7	60569C8B-7209-4A3F-A177-F337085E9146	Alive	FEMALE	TUMOR FREE	0	0	2	No	BLACK OR AFRICAN AMERICAN	Primary Tumor
TCGA-A2-A0ER-01	TCGA-A2-A0ER			T1c	M0	-23021		0.0756	1903	1862	NA	63		74.3	DiseaseFree	Positive	NOT HISPANIC OR LATINO	Core needle biopsy		2010-08-13	C50.9	YES	300	C50.9	8500/3	NO	0		Post (prior bilateral ovariectomy OR >12 mo since LMP with no prior hysterectomy)	23	No	N1mi	Stage IB		TRUE	7455d832-ad66-40df-85d7-3a7051c4498d	5c703f38-38a5-4543-a964-88cf1d5ba2f1	LIVING	74.3	A5D94D02-5423-4055-96E3-B5AA5799DC02	Alive	FEMALE	TUMOR FREE	0	1	14	No	WHITE	Primary Tumor
TCGA-A2-A0ES-01	TCGA-A2-A0ES			T2	M0	-19160		0.005626	1001	756	NA	52		37	DiseaseFree	Negative	NOT HISPANIC OR LATINO	Core needle biopsy		2011-01-05	C50.9	YES	460	C50.9	8520/3	NO	0		Post (prior bilateral ovariectomy OR >12 mo since LMP with no prior hysterectomy)	5	No	N0 (i-)	Stage IIA		TRUE	a2934508-3daf-49e2-b14f-ed9b7693f96f	14e1cd4b-0d60-4202-981d-7e1e02a17006	LIVING	37	6860A718-FAAB-44A1-A3C1-E4A9EC1ECB05	Alive	FEMALE	TUMOR FREE	0	0	1	No	WHITE	Primary Tumor
TCGA-A2-A0ET-01	TCGA-A2-A0ET			T2	M0	-21464		0.508	807	674	NA	58		35	DiseaseFree	Negative	NOT HISPANIC OR LATINO	Core needle biopsy		2010-09-20	C50.9	YES	890	C50.9	8500/3	NO	0		Post (prior bilateral ovariectomy OR >12 mo since LMP with no prior hysterectomy)	28	No	N2a	Stage IIIA		TRUE	96f23d8a-be0f-4925-ba00-805dc293414c	a7e04cc7-3f4c-4986-a336-8083e5653754	LIVING	35	E9D3FFF1-5FB2-4F17-9C1D-D9775E3CC5AC	Alive	FEMALE	TUMOR FREE	0	5	15	No	WHITE	Primary Tumor
TCGA-A2-A0EU-01	TCGA-A2-A0EU			T1c	M0	-29144		0.517	733	644	NA	79		34.3	DiseaseFree	Positive	NOT HISPANIC OR LATINO	Core needle biopsy		2010-08-11	C50.9	YES	610	C50.9	8500/3	NO	0		Post (prior bilateral ovariectomy OR >12 mo since LMP with no prior hysterectomy)	38	No	N0 (i-)	Stage IA		TRUE	c0427237-b476-4af4-b664-7bd479922ea5	69dbb2ae-3f19-4c29-9c24-810ae60312f3	LIVING	34.3	42649B9A-29D4-4D05-A78C-AC801792ADEB	Alive	FEMALE	TUMOR FREE	0	0	1	No	WHITE	Primary Tumor
TCGA-A2-A0EV-01	TCGA-A2-A0EV			T1c	M0	-29285		0.209	545	590	NA	80		31.8	DiseaseFree	Negative	NOT HISPANIC OR LATINO	Core needle biopsy		2010-08-11	C50.9	YES	960	C50.9	8500/3	NO	0		Post (prior bilateral ovariectomy OR >12 mo since LMP with no prior hysterectomy)	55	No	N0 (i-)	Stage IA		TRUE	7032ec9c-e96b-4642-a7b6-d0aee7a3add2	bf0f55ac-2f35-4f8b-a1d9-c4e283fc7365	LIVING	31.8	2A62DD22-EFE6-48CD-8BE6-59B08168F78A	Alive	FEMALE	TUMOR FREE	0	0	6	No	WHITE	Primary Tumor
TCGA-A2-A0EW-01	TCGA-A2-A0EW			T1b	M0	-19413		0.0724	770	542	NA	53		29.7	DiseaseFree	Positive	NOT HISPANIC OR LATINO	Core needle biopsy		2011-01-05	C50.9	YES	1710	C50.9	8520/3	NO	0		Post (prior bilateral ovariectomy OR >12 mo since LMP with no prior hysterectomy)	12	No	N3a	Stage IIIC		TRUE	8d5fe6e8-d2cc-481f-a6a1-9cb6e7982cde	84ff236c-bc58-4797-9a34-da53eb1620dc	LIVING	29.7	2620E5E7-ED7D-4F04-A8AF-1499E9711E8A	Alive	FEMALE	TUMOR FREE	0	26	NA	No	WHITE	Primary Tumor
TCGA-A2-A0EX-01	TCGA-A2-A0EX			T3	M0	-16858		0.1	550	468	NA	46		24.7	DiseaseFree	Positive	NOT HISPANIC OR LATINO	Core needle biopsy		2010-08-13	C50.9	YES	650	C50.9	8520/3	NO	0		Post (prior bilateral ovariectomy OR >12 mo since LMP with no prior hysterectomy)	25	No	N0 (i+)	Stage IIB		TRUE	9d8702e1-1a36-4bca-85ab-5f11d58d7953	c8e05740-9d67-4e06-a30f-4298b6523a5a	LIVING	24.7	5B82545F-2636-4A8A-88DD-1B387DE678FF	Alive	FEMALE	TUMOR FREE	1	0	1	No	WHITE	Primary Tumor
TCGA-A2-A0EY-01	TCGA-A2-A0EY			T2	M0	-22872		0.639	485	358	NA	62		24.1	DiseaseFree	Negative	NOT HISPANIC OR LATINO	Core needle biopsy		2010-09-21	C50.9	YES	580	C50.9	8500/3	NO	0		Post (prior bilateral ovariectomy OR >12 mo since LMP with no prior hysterectomy)	163	No	N1a	Stage IIB		TRUE	d67cd793-2931-429a-9084-2f3c4c8be7ad	2a3e4dbb-aaff-4b14-bbed-f2d7cf0f8fa3	LIVING	24.1	61462D57-DF98-4F89-BAEF-E8156A47E2DD	Alive	FEMALE	TUMOR FREE	0	1	23	No	WHITE	Primary Tumor
TCGA-A2-A0ST-01	TCGA-A2-A0ST			T1c	M0	-22922		0.0109	1643	2597	NA	62		99.1	DiseaseFree	Negative	NOT HISPANIC OR LATINO	Excisional Biopsy		2010-11-09	C50.9	YES	210	C50.9	8500/3	NO	0		Post (prior bilateral ovariectomy OR >12 mo since LMP with no prior hysterectomy)	19	No	N1a	Stage IIA		TRUE	12d31787-e54d-4729-ace8-9141043c92b8	8da89b04-df25-4ed7-9d9a-e6c9478784e7	LIVING	99.1	1E8B978E-3D1B-46E8-80EE-3A11EE571CEC	Alive	FEMALE		0	3	9	No	WHITE	Primary Tumor
TCGA-A2-A0SU-01	TCGA-A2-A0SU			T2	M0	-24219		0.118	1352	1317	NA	66		54.6	DiseaseFree	Negative	NOT HISPANIC OR LATINO	Core needle biopsy		2010-11-17	C50.9	YES	380	C50.9	8500/3	NO	0		Post (prior bilateral ovariectomy OR >12 mo since LMP with no prior hysterectomy)	20	No	N0 (i+)	Stage IIA		TRUE	c632675e-e8af-43cd-8744-5be3754c1c14	46b0a695-f283-4623-a78b-954753e8ee62	LIVING	54.6	BC75790C-FBC7-4897-B228-762245C48740	Alive	FEMALE	TUMOR FREE	1	0	7	No	WHITE	Primary Tumor
TCGA-A2-A0SV-01	TCGA-A2-A0SV			T2	M1	-23126		0.38	NA	1513	825	63		1.58	Recurred/Progressed	Positive	NOT HISPANIC OR LATINO	Core needle biopsy		2010-11-15	C50.9	YES	600	C50.9	8500/3	NO	0		Post (prior bilateral ovariectomy OR >12 mo since LMP with no prior hysterectomy)	29	No	N2a	Stage IV		TRUE	ad01259b-d858-40bc-a6ba-0bb06e996afb	7909743a-2bde-48c3-8254-3fbd57ac2e33	DECEASED	27.1	161E2817-7DB2-46F8-BFEB-256DBBEFE633	Dead	FEMALE	WITH TUMOR	0	8	9	No	WHITE	Primary Tumor
TCGA-A2-A0SW-01	TCGA-A2-A0SW			T2	M1	-30085		0.43	NA	1337	1365	82		21.4	Recurred/Progressed	Negative	NOT HISPANIC OR LATINO	Core needle biopsy		2010-11-08	C50.9	YES	680	C50.9	8500/3	NO	0		Post (prior bilateral ovariectomy OR >12 mo since LMP with no prior hysterectomy)	47	No	N2	Stage IV		TRUE	991e1427-3c01-423d-abfd-4584302ca72c	9113cf96-0feb-4e13-b1d5-0ddd12c2cab7	DECEASED	44.8	8401DFCF-8793-461A-B17E-E6584CE2423B	Dead	FEMALE	WITH TUMOR	0	4	15	No	WHITE	Primary Tumor
TCGA-A2-A0SX-01	TCGA-A2-A0SX			T1c	M0	-17774		0.382	1288	1177	NA	48		40.7	Recurred/Progressed	Positive	NOT HISPANIC OR LATINO	Core needle biopsy		2010-11-09	C50.9	YES	910	C50.9	8500/3	NO	0		Pre (<6 months since LMP AND no prior bilateral ovariectomy AND not on estrogen replacement)	25	No	N0 (i-)	Stage IA		TRUE	18d35983-ea6a-4b70-a209-9bef37595956	c0819744-0dad-4597-b9ac-9117497418a8	LIVING	50.4	63F76DB5-8433-4EFE-9054-6C04F065DF2D	Alive	FEMALE	WITH TUMOR	0	0	1	No	WHITE	Primary Tumor
TCGA-A2-A0SY-01	TCGA-A2-A0SY			T3	M0	-22928		0.104	1154	1083	NA	62		44.3	DiseaseFree	Negative	NOT HISPANIC OR LATINO	Core needle biopsy		2010-11-12	C50.9	YES	510	C50.9	8520/3	NO	0		Post (prior bilateral ovariectomy OR >12 mo since LMP with no prior hysterectomy)	104	No	N1	Stage IIIA		TRUE	dc696e3c-f448-468f-a576-f4429be0338a	759a1619-0432-4988-8a6f-5a0ef0956f87	LIVING	44.3	8E6902A6-A673-46CC-9AEB-3A71EF11099F	Alive	FEMALE	TUMOR FREE	0	1	14	No	WHITE	Primary Tumor
TCGA-A2-A0T0-01	TCGA-A2-A0T0			T2	M0	-21575		0.453	337	268	NA	59		17.5	DiseaseFree	Negative	NOT HISPANIC OR LATINO	Core needle biopsy		2010-11-12	C50.9	YES	190	C50.9	8500/3	NO	0		Post (prior bilateral ovariectomy OR >12 mo since LMP with no prior hysterectomy)	145	No	N1	Stage IIB		TRUE	95c53f69-0f05-4348-822a-571f3d757001	e240d339-c042-42dc-b97a-d1effcac44b7	LIVING	17.5	6F5EBE67-0A25-4B20-A1F6-9CE6C4FF4096	Alive	FEMALE	TUMOR FREE	0	2	14	No	WHITE	Primary Tumor
TCGA-A2-A0T1-01	TCGA-A2-A0T1			T3	M0	-20227		0.187	323	233	NA	55		17.1	DiseaseFree	Negative	NOT HISPANIC OR LATINO	Core needle biopsy		2010-11-12	C50.9	YES	230	C50.9	8500/3	NO	0		Post (prior bilateral ovariectomy OR >12 mo since LMP with no prior hysterectomy)	15	No	N3	Stage IIIC		TRUE	02bed00f-bef7-4fb7-b243-540354990e45	c90925f3-2126-478f-b0d4-f3b2c50cfbf9	LIVING	17.1	7546B7FB-1976-4994-AFB7-6270382D44D7	Alive	FEMALE	TUMOR FREE	0	10	10	No	AMERICAN INDIAN OR ALASKA NATIVE	Primary Tumor
TCGA-A2-A0T2-01	TCGA-A2-A0T2			T3	M1	-24235		0.946	NA	261	255	66		2.56	Recurred/Progressed	Close	NOT HISPANIC OR LATINO	Core needle biopsy		2010-11-12	C50.9	YES	270	C50.9	8500/3	NO	0		Post (prior bilateral ovariectomy OR >12 mo since LMP with no prior hysterectomy)	43	No	N3	Stage IV		TRUE	128d198e-9b22-427c-90db-3714455f3a17	eeb8b594-1bba-4af3-be80-682e261965b4	DECEASED	8.38	0DCD80E1-173E-4A1B-BDD8-74C7D12C1313	Dead	FEMALE	WITH TUMOR	0	10	14	No	WHITE	Primary Tumor
TCGA-A2-A0T3-01	TCGA-A2-A0T3		7th	T1c	M0	-13680		0.553	456	303	NA	37		18.7	DiseaseFree	Positive	NOT HISPANIC OR LATINO	Core needle biopsy		2011-02-21	C50.9	YES	270	C50.9	8500/3	NO	0	YES	Pre (<6 months since LMP AND no prior bilateral ovariectomy AND not on estrogen replacement)	28	No	N1mi	Stage IB		TRUE	058dcb78-bed1-40c3-a6c2-a0cc40065531	78f8b01e-292f-4131-a3ef-4f9faec7913a	LIVING	18.7	E339A88E-3B39-465A-9545-FBA4F79727CC	Alive	FEMALE	TUMOR FREE	0	2	13	No	WHITE	Primary Tumor
TCGA-A2-A0T4-01	TCGA-A2-A0T4			T2	M0	-22849		0.221	395	303	NA	62		20.5	DiseaseFree	Negative	NOT HISPANIC OR LATINO	Core needle biopsy		2010-11-17	C50.9	YES	1500	C50.9	8520/3	NO	0		Post (prior bilateral ovariectomy OR >12 mo since LMP with no prior hysterectomy)	28	No	N0 (i-)	Stage IIA		TRUE	b0f8d698-a30e-4d8d-b0a2-a5a01fac8406	36ccb542-78a6-4960-8d49-fa02e08fd36f	LIVING	20.5	5B685F7F-917D-41BA-A7AB-D0E15D457BC5	Alive	FEMALE	TUMOR FREE	0	0	2	No	WHITE	Primary Tumor
TCGA-A2-A0T5-01	TCGA-A2-A0T5			T2	M0	-14503		0.115	321	263	NA	39		17.4	DiseaseFree	Negative	NOT HISPANIC OR LATINO	Core needle biopsy		2010-11-09	C50.9	YES	1740	C50.9	8500/3	NO	0		Pre (<6 months since LMP AND no prior bilateral ovariectomy AND not on estrogen replacement)	1080	No	N0 (i-)	Stage IIA		TRUE	36d77496-99f8-4911-ba7c-89fae32662aa	bbf837cc-d336-45bc-9024-a018a667f8ec	LIVING	17.4	7B1E6EEB-3B61-4CE8-B695-ED11C2EF169F	Alive	FEMALE	TUMOR FREE	0	0	4	No	WHITE	Primary Tumor
TCGA-A2-A0T6-01	TCGA-A2-A0T6			T3	M0	-18334		0.116	344	343	NA	50		18.9	DiseaseFree	Negative	NOT HISPANIC OR LATINO	Core needle biopsy		2010-11-17	C50.9	YES	1020	C50.9	8520/3	NO	0		Pre (<6 months since LMP AND no prior bilateral ovariectomy AND not on estrogen replacement)	94	No	N0 (i-)	Stage IIB		TRUE	08306ede-e74b-4be9-b768-7fd98647b6ac	f05204c8-8301-4117-b826-b5fa194d28d2	LIVING	18.9	377F7050-F900-4345-A326-568F00050BC3	Alive	FEMALE	TUMOR FREE	0	0	3	No	WHITE	Primary Tumor
TCGA-A2-A0T7-01	TCGA-A2-A0T7			T2	M0	-18756		0.342	397	280	NA	51		20.7	DiseaseFree	Positive	NOT HISPANIC OR LATINO	Core needle biopsy		2010-11-17	C50.9	YES	990	C50.9	8500/3	NO	0		Pre (<6 months since LMP AND no prior bilateral ovariectomy AND not on estrogen replacement)	23	No	N0 (i+)	Stage IIA		TRUE	43d5632e-7272-4aad-9496-7f5a99671223	dd8ebcff-9598-45db-b762-7ef446159e52	LIVING	20.7	383EC600-FBF3-4F91-8FAC-41E3DDE6589E	Alive	FEMALE	TUMOR FREE	1	0	2	No	WHITE	Primary Tumor
TCGA-A2-A0YC-01	TCGA-A2-A0YC			T2	M0	-21685		0.111	644	673	NA	59		26.2	Recurred/Progressed	Close	NOT HISPANIC OR LATINO	Core needle biopsy		2010-12-08	C50.9	YES	1170	C50.9	8500/3	NO	0		Post (prior bilateral ovariectomy OR >12 mo since LMP with no prior hysterectomy)	19	No	N1mi	Stage IIB		TRUE	a1872011-b928-4189-ac02-e87506c20bca	00d38274-8ed5-46af-9a69-91d968a050ab	LIVING	32.5	9BAD4BD4-A54B-4115-A00E-6AA88F344FE1	Alive	FEMALE	TUMOR FREE	0	1	3	No	WHITE	Primary Tumor
TCGA-A2-A0YD-01	TCGA-A2-A0YD			T3	M0	-23021		0.0935	550	572	NA	63		25.3	DiseaseFree	Negative	NOT HISPANIC OR LATINO	Core needle biopsy		2010-12-08	C50.9	YES	740	C50.9	8520/3	NO	0		Post (prior bilateral ovariectomy OR >12 mo since LMP with no prior hysterectomy)	64	No	N0 (i+)	Stage IIB		TRUE	2c6adb12-380d-4710-a7e6-93d5a0e53289	08add75d-f706-458a-a6a8-41da7e07af19	LIVING	25.3	10DA3573-BD53-4579-AD90-E770CEF08498	Alive	FEMALE	TUMOR FREE	1	0	2	No	WHITE	Primary Tumor
TCGA-A2-A0YE-01	TCGA-A2-A0YE			T2	M0	-17727		0.781	253	238	NA	48		18.2	DiseaseFree	Negative	NOT HISPANIC OR LATINO	Core needle biopsy		2010-12-10	C50.9	YES	240	C50.9	8500/3	NO	0		Post (prior bilateral ovariectomy OR >12 mo since LMP with no prior hysterectomy)	37	No	N1a	Stage IIB		TRUE	84a88e8d-1e65-4b88-aae6-bf4c7a7e4c33	c8426c95-e975-4a7e-9943-f5c513dd95ef	LIVING	18.2	C58701EF-98C4-448E-978C-B39D125CC7E8	Alive	FEMALE	TUMOR FREE	NA	1	19	No	WHITE	Primary Tumor
TCGA-A2-A0YF-01	TCGA-A2-A0YF			T1b	M0	-24660		0.123	289	343	NA	67		15.4	DiseaseFree	Negative	NOT HISPANIC OR LATINO	Core needle biopsy		2010-12-02	C50.9	YES	600	C50.4	8500/3	NO	0		Post (prior bilateral ovariectomy OR >12 mo since LMP with no prior hysterectomy)	16	No	N0 (i+)	Stage IA		TRUE	ae8c77fe-e6c8-44d5-8265-4a38c637bbef	2b721ce6-b620-4216-9846-c82543880bb3	LIVING	15.4	C4C7D190-F0EC-4A70-8136-534EA3419217	Alive	FEMALE	TUMOR FREE	1	0	1	No	BLACK OR AFRICAN AMERICAN	Primary Tumor
TCGA-A2-A0YG-01	TCGA-A2-A0YG			T2	M0	-23058		0.367	404	329	NA	63		21.9	DiseaseFree	Negative	NOT HISPANIC OR LATINO	Core needle biopsy		2011-01-03	C50.9	YES	1530	C50.9	8500/3	NO	0		Post (prior bilateral ovariectomy OR >12 mo since LMP with no prior hysterectomy)	45	No	N3a	Stage IIIC		TRUE	c0892598-1f7b-4f23-9cd8-731f797753d5	5006c942-bc9a-41cb-8674-2341b4e66230	LIVING	21.9	B3D6A0F7-5E3C-4921-8399-6458E5222CC5	Alive	FEMALE	TUMOR FREE	NA	14	18	No	WHITE	Primary Tumor
TCGA-A2-A0YH-01	TCGA-A2-A0YH			T2	M0	-19596		0.315	379	321	NA	53		21.6	DiseaseFree	Negative	NOT HISPANIC OR LATINO	Core needle biopsy		2010-12-14	C50.9	YES	480	C50.9	8500/3	NO	0		Post (prior bilateral ovariectomy OR >12 mo since LMP with no prior hysterectomy)	66	No	N2a	Stage IIIA		TRUE	298d33da-15af-48cb-b30f-eaf54e7baa43	835ef481-0c0c-4621-9111-e23d63ca9d7c	LIVING	21.6	0C344CD7-6FAB-462B-9A8E-75B720F2D626	Alive	FEMALE	TUMOR FREE	0	5	28	No	WHITE	Primary Tumor
TCGA-A2-A0YI-01	TCGA-A2-A0YI			T1c	M0	-22961		0.189	358	303	NA	62		14.5	DiseaseFree	Negative	NOT HISPANIC OR LATINO	Core needle biopsy		2010-12-14	C50.9	YES	340	C50.9	8522/3	NO	0		Post (prior bilateral ovariectomy OR >12 mo since LMP with no prior hysterectomy)	10	No	N0 (i+)	Stage IA		TRUE	72cd1b17-d349-4551-83f7-3062ce9db865	f549267b-0932-45f0-b7e6-c4a42cac50c8	LIVING	14.5	CEFD12BB-1AF7-400D-8A84-49650DFDD8A5	Alive	FEMALE	TUMOR FREE	1	0	3	No	WHITE	Primary Tumor
TCGA-A2-A0YJ-01	TCGA-A2-A0YJ			T3	M0	-14448		0.531	326	264	NA	39		18.4	Recurred/Progressed	Negative	NOT HISPANIC OR LATINO	Core needle biopsy		2010-12-28	C50.9	YES	1080	C50.9	8500/3	NO	0		Pre (<6 months since LMP AND no prior bilateral ovariectomy AND not on estrogen replacement)	56	No	N2a	Stage IIIA		TRUE	796b593f-5886-4a27-bf94-7ea8df325e1a	3c70741c-621e-434d-b98e-6561d05a1b4b	LIVING	18.6	90F13DE2-7C8F-4FA2-B9BF-D68EEC37D514	Alive	FEMALE	TUMOR FREE	NA	5	18	No	WHITE	Primary Tumor
TCGA-A2-A0YK-01	TCGA-A2-A0YK			T2	M0	-22625		0.106	334	280	NA	61		19.3	DiseaseFree	Close	NOT HISPANIC OR LATINO	Core needle biopsy		2010-12-28	C50.9	YES	620	C50.9	8520/3	NO	0		Post (prior bilateral ovariectomy OR >12 mo since LMP with no prior hysterectomy)	208	No	N0 (i-)	Stage IIA		TRUE	8f34cb4c-5798-47a0-89a1-f0ee26a8ae93	35276e2e-eb29-47be-88ab-3822b82153ea	LIVING	19.3	C3B5F075-864A-4D8B-B0CB-1B1FA28ACF4F	Alive	FEMALE	TUMOR FREE	0	0	3	No	WHITE	Primary Tumor
TCGA-A2-A0YL-01	TCGA-A2-A0YL			T3	M0	-17702		0.104	268	205	NA	48		14.6	DiseaseFree	Negative	NOT HISPANIC OR LATINO	Core needle biopsy		2010-12-27	C50.9	YES	730	C50.9	8520/3	NO	0		Pre (<6 months since LMP AND no prior bilateral ovariectomy AND not on estrogen replacement)	16	No	N2a	Stage IIIA		TRUE	b205c89f-af62-4186-acad-ed23d243fa98	905c8468-92b3-4e58-8445-6692775c7fde	LIVING	14.6	AB083371-A2AB-4F57-8FBF-0DB2C91CEDDE	Alive	FEMALE	TUMOR FREE	0	4	29	No	WHITE	Primary Tumor
TCGA-A2-A0YM-01	TCGA-A2-A0YM			T2	M0	-24831		0.434	662	691	NA	67		31.7	DiseaseFree	Negative	NOT HISPANIC OR LATINO	Core needle biopsy		2010-12-08	C50.9	YES	360	C50.9	8500/3	NO	0		Post (prior bilateral ovariectomy OR >12 mo since LMP with no prior hysterectomy)	64	No	N0 (i-)	Stage IIA		TRUE	5cbf0aea-ebb4-4005-bdd5-14ef2dc6826c	27ac43e4-c348-4f83-97f5-cc0f4a87b670	LIVING	31.7	E1D8F2CB-25F1-49E0-92D3-132DCA8FD533	Alive	FEMALE	TUMOR FREE	0	0	5	No	WHITE	Primary Tumor
TCGA-A2-A0YT-01	TCGA-A2-A0YT			T4b	M0	-20482		0.576	NA	884	723	56		NA		Negative	NOT HISPANIC OR LATINO	Core needle biopsy		2010-12-10	C50.9	YES	950	C50.9	8500/3	NO	0		Post (prior bilateral ovariectomy OR >12 mo since LMP with no prior hysterectomy)	45	Yes	N2a	Stage IIIB		TRUE	14b95463-2108-4921-afc2-e29eef52b18f	0fcd1ba3-8461-4533-9952-2831daf6a4db	DECEASED	23.8	1C420F6B-8720-4CB0-9FB3-86A0EC05FBBD	Dead	FEMALE	TUMOR FREE	NA	5	5	No	WHITE	Primary Tumor
TCGA-A2-A1FV-01	TCGA-A2-A1FV		7th	T3	M0	-27287		0.4	461	372	NA	74		23.5	DiseaseFree	Negative	NOT HISPANIC OR LATINO	Core needle biopsy		2011-05-26	C50.9	YES	150	C50.9	8520/3	NO	0	YES	Post (prior bilateral ovariectomy OR >12 mo since LMP with no prior hysterectomy)	40	No	N0 (i+)	Stage IIB		TRUE	cd0c96a4-6414-4efb-879b-7408b62ed5b6	1624f434-259b-4782-afe1-7ac3d13d7807	LIVING	23.5	074223E9-5E1C-47E8-BE40-1C4442CAE9F0	Alive	FEMALE		1	0	2	No	WHITE	Primary Tumor
TCGA-A2-A1FW-01	TCGA-A2-A1FW		7th	T3	M0	-22779		0.606	221	198	NA	62		17.4	DiseaseFree	Negative	NOT HISPANIC OR LATINO	Core needle biopsy		2011-05-11	C50.9	YES	640	C50.9	8500/3	NO	0	YES	Post (prior bilateral ovariectomy OR >12 mo since LMP with no prior hysterectomy)	59	No	N2a	Stage IIIA		TRUE	54883111-d475-4515-ba3f-fece8a71e79e	0dfe13f0-e1f5-4f7e-95b5-e88f9d9e920a	LIVING	17.4	849E9FA7-3420-427B-A310-3346CFA9F0CC	Alive	FEMALE	TUMOR FREE	0	5	19	No	WHITE	Primary Tumor
TCGA-A2-A1FX-01	TCGA-A2-A1FX		6th	T3	M0	-22344		0.424	935	937	NA	61		36.8	DiseaseFree	Positive	NOT HISPANIC OR LATINO	Core needle biopsy		2011-05-12	C50.9	YES	360	C50.9	8500/3	NO	0	YES	Post (prior bilateral ovariectomy OR >12 mo since LMP with no prior hysterectomy)	21	No	N2a	Stage IIIA		TRUE	ac6d3ba9-f84f-4657-aa85-4d66fb7c09da	71e87611-903b-4b9d-a506-87e58914dc81	LIVING	36.8	EAFC71A1-D6FC-46EA-BC47-D054C497D705	Alive	FEMALE	TUMOR FREE	0	6	24	No	WHITE	Primary Tumor
TCGA-A2-A1FZ-01	TCGA-A2-A1FZ		7th	T2	M0	-23055		0.101	410	335	NA	63		22.4	DiseaseFree	Negative	NOT HISPANIC OR LATINO	Core needle biopsy		2011-04-21	C50.9	YES	740	C50.1	8500/3	NO	0	YES	Post (prior bilateral ovariectomy OR >12 mo since LMP with no prior hysterectomy)	29	No	N0 (i-)	Stage IIA		TRUE	805bfe39-3695-43c2-93e4-d66d0559b89f	d5d86fc3-a720-43b7-8125-160f3af04de0	LIVING	22.4	F93E326D-F4E0-4000-8A67-AA19C4D3637A	Alive	FEMALE	TUMOR FREE	0	0	3	No	WHITE	Primary Tumor
TCGA-A2-A1G0-01	TCGA-A2-A1G0		7th	T2	M0	-18002		0.149	380	315	NA	49		20.2	DiseaseFree	Negative	NOT HISPANIC OR LATINO	Core needle biopsy		2011-04-21	C50.9	YES	730	C50.2	8520/3	NO	0	YES	Pre (<6 months since LMP AND no prior bilateral ovariectomy AND not on estrogen replacement)	26	No	N1a	Stage IIB		TRUE	2e538802-2a31-4774-89a8-c6e4381a887d	3596c171-86d4-48ae-80a5-847c874d4860	LIVING	20.2	DA82E751-09C3-466E-A63A-38368D8A2C7C	Alive	FEMALE		NA	2	19	No	WHITE	Primary Tumor
TCGA-A2-A1G1-01	TCGA-A2-A1G1		7th	T2	M0	-31223		0.176	371	338	NA	85		19.2	DiseaseFree	Negative	NOT HISPANIC OR LATINO	Core needle biopsy		2011-05-12	C50.9	YES	280	C50.9	8500/3	NO	0	YES	Post (prior bilateral ovariectomy OR >12 mo since LMP with no prior hysterectomy)	27	No	N1	Stage IIB		TRUE	75b5529b-565a-4eba-918a-910b2f441d32	159debac-79e0-4727-940c-020e120f8347	LIVING	19.2	E2E6CA22-AFE4-4B8F-90AC-32639687A590	Alive	FEMALE	TUMOR FREE	0	1	13	No	WHITE	Primary Tumor
TCGA-A2-A1G4-01	TCGA-A2-A1G4		7th	T3	M0	-25966		0.153	372	310	NA	71		19.6	DiseaseFree	Negative	NOT HISPANIC OR LATINO	Core needle biopsy		2011-04-22	C50.9	YES	710	C50.9	8500/3	NO	0	YES	Post (prior bilateral ovariectomy OR >12 mo since LMP with no prior hysterectomy)	41	No	N1a	Stage IIIA		TRUE	e3b555aa-7f0a-49c6-9b13-182c61a144c1	81243c1f-affa-4985-ba0e-1f19db52db73	LIVING	19.6	5AD3B697-F097-496C-978B-F73BDA5394A7	Alive	FEMALE	TUMOR FREE	NA	2	15	No	WHITE	Primary Tumor
TCGA-A2-A1G6-01	TCGA-A2-A1G6		7th	T2	M0	-18514		0.0001097	132	229	NA	50		16.5	DiseaseFree	Negative	NOT HISPANIC OR LATINO	Core needle biopsy		2011-04-22	C50.9	YES	770	C50.9	8500/3	NO	0	YES	Pre (<6 months since LMP AND no prior bilateral ovariectomy AND not on estrogen replacement)	4	No	N2a	Stage IIIA		TRUE	295cf595-4a29-46a3-a0c5-e5f08f947031	e957973b-0b41-484f-9f16-a112bed3107e	LIVING	16.5	02B4C31E-38F0-4AF3-8DAD-527D5F27C11A	Alive	FEMALE	TUMOR FREE	NA	4	9	No	WHITE	Primary Tumor
TCGA-A2-A259-01	TCGA-A2-A259		7th	T1c	M0	-25666		0.107	1286	1238	NA	70		52.4	DiseaseFree	Close	NOT HISPANIC OR LATINO	Core needle biopsy		2011-06-20	C50.9	YES	280	C50.9	8500/3	NO	0	YES	Post (prior bilateral ovariectomy OR >12 mo since LMP with no prior hysterectomy)	17	No	N0 (i-)	Stage IA		TRUE	3fc3755d-a3f8-4e2c-813f-ff124f2a75c1	eb2de640-6c2a-4c8a-87c3-80f9fbdc3d9b	LIVING	52.4	33569E07-D7BF-491B-A352-CEEA81556800	Alive	FEMALE	TUMOR FREE	0	0	2	No	BLACK OR AFRICAN AMERICAN	Primary Tumor
TCGA-A2-A25A-01	TCGA-A2-A25A		6th	T2	M0	-16084		0.119	2968	2927	NA	44		108	DiseaseFree	Negative	NOT HISPANIC OR LATINO	Core needle biopsy		2011-06-21	C50.9	YES	160	C50.9	8520/3	NO	0	YES	Pre (<6 months since LMP AND no prior bilateral ovariectomy AND not on estrogen replacement)	102	No	N0 (i-)	Stage IIA		TRUE	aaea5f9c-b35b-47f8-93cb-bdc7b81844ff	57e65074-4dc7-4f55-9638-8d123702305c	LIVING	108	3971CA42-F1B0-4D85-9AD3-210B98E76A9C	Alive	FEMALE	TUMOR FREE	0	0	14	Yes	WHITE	Primary Tumor
TCGA-A2-A25B-01	TCGA-A2-A25B		7th	T2	M0	-14454		0.43	258	183	NA	39		16.3	DiseaseFree	Close	NOT HISPANIC OR LATINO	Core needle biopsy		2011-07-15	C50.9	YES	840	C50.9	8500/3	NO	0	YES	Pre (<6 months since LMP AND no prior bilateral ovariectomy AND not on estrogen replacement)	71	No	N1	Stage IIB		TRUE	eadf8482-e60e-4307-adb7-d5c3b9fa6cae	2c619641-7849-4837-ab92-0da80342b3e9	LIVING	16.3	FCE29F34-5D13-4A21-A950-A8577C957C10	Alive	FEMALE	TUMOR FREE	0	2	8	No	BLACK OR AFRICAN AMERICAN	Primary Tumor
TCGA-A2-A25C-01	TCGA-A2-A25C		7th	T2	M0	-18508		0.326	285	215	NA	50		17.2	DiseaseFree	Negative	NOT HISPANIC OR LATINO	Core needle biopsy		2011-07-15	C50.9	YES	730	C50.9	8500/3	NO	0	YES	Pre (<6 months since LMP AND no prior bilateral ovariectomy AND not on estrogen replacement)	23	No	N1a	Stage IIB		TRUE	7aedb46a-48ec-4e0e-8baa-c9ea4c4a7cf1	9d657232-b6b4-4100-833c-5f94059a9ba7	LIVING	17.2	1D4CA1BA-B534-4CEA-ABA5-EF9B31694204	Alive	FEMALE	TUMOR FREE	0	3	14	No	WHITE	Primary Tumor
TCGA-A2-A25D-01	TCGA-A2-A25D		7th	T2	M0	-32872		0.236	243	224	NA	90		18.1	DiseaseFree	Positive	NOT HISPANIC OR LATINO	Core needle biopsy		2011-06-21	C50.9	YES	430	C50.9	8520/3	NO	0	YES	Post (prior bilateral ovariectomy OR >12 mo since LMP with no prior hysterectomy)	43	No	N3a	Stage IIIC		TRUE	3b963d72-ba5c-467b-83c9-fbdb462510a3	eda0ff5c-84cf-44cb-888f-0aab17441dfa	LIVING	18.1	BE63B06A-E3E0-4E00-9B9F-5E7DE8852E07	Alive	FEMALE	TUMOR FREE	0	22	24	No	WHITE	Primary Tumor
TCGA-A2-A25E-01	TCGA-A2-A25E		6th	T2	M0	-12601		0.337	2511	2441	NA	34		91.8	DiseaseFree	Negative	NOT HISPANIC OR LATINO	Excisional Biopsy		2011-07-21	C50.9	YES	200	C50.9	8500/3	NO	0	YES	Pre (<6 months since LMP AND no prior bilateral ovariectomy AND not on estrogen replacement)	56	No	N2a	Stage IIIA		TRUE	ba89cb4f-cd63-47b1-9550-76fdaff89f2e	8da9c00e-1ec3-4657-9511-a2a00b8961cb	LIVING	91.8	B81555D4-78D9-4235-AABE-F852CA6F15B5	Alive	FEMALE	TUMOR FREE	0	6	10	No	BLACK OR AFRICAN AMERICAN	Primary Tumor
TCGA-A2-A25F-01	TCGA-A2-A25F		7th	T2	M0	-24319		0.002139	114	86	NA	66		10.6	DiseaseFree	Negative	NOT HISPANIC OR LATINO	Core needle biopsy		2011-07-26	C50.9	YES	390	C50.9	8500/3	NO	0	YES	Post (prior bilateral ovariectomy OR >12 mo since LMP with no prior hysterectomy)	15	No	N0 (i-)	Stage IIA		TRUE	c836951b-3ffb-4e20-8504-0eccb7d50dd4	d8b4969f-428d-4bf3-bbd8-883c72e8a934	LIVING	10.6	AC60F5BB-9371-4F69-BAA0-099AD7FC2A0B	Alive	FEMALE	TUMOR FREE	0	0	2	No	WHITE	Primary Tumor
TCGA-A2-A3KC-01	TCGA-A2-A3KC		7th	T2	M0	-20401		0.14	363	299	NA	55		20.9	DiseaseFree	Negative	NOT HISPANIC OR LATINO	Core needle biopsy		2012-03-14	C50.9	YES	780	C50.9	8520/3	NO	0	YES	Pre (<6 months since LMP AND no prior bilateral ovariectomy AND not on estrogen replacement)	24	No	N1a	Stage IIB		TRUE	2D29A4AC-98E7-4663-9DD6-5681BC32AC2E	8318A9A4-E78E-4DB8-97C7-2CC733D0C512	LIVING	20.9	593AF241-8F84-4BA0-8878-7C1CE72A460B	Alive	FEMALE	TUMOR FREE	0	2	19	No	BLACK OR AFRICAN AMERICAN	Primary Tumor
TCGA-A2-A3KD-01	TCGA-A2-A3KD		7th	T3	M0	-17372		0.202	804	700	NA	47		39.6	DiseaseFree	Positive	NOT HISPANIC OR LATINO	Core needle biopsy		2012-04-02	C50.9	YES	770	C50.9	8480/3	NO	0	YES	Pre (<6 months since LMP AND no prior bilateral ovariectomy AND not on estrogen replacement)	9	No	N1mi	Stage IIIA		TRUE	BB026999-0AAB-4232-96D7-2C93B6C9691D	401D075C-D443-4592-8C03-E675CAAD2B50	LIVING	39.6	3E4717BA-E9AE-45F9-9696-F8928D9FCECC	Alive	FEMALE	TUMOR FREE	1	1	19	No	WHITE	Primary Tumor
TCGA-A2-A3XS-01	TCGA-A2-A3XS		6th	T1	M0	-23000		0.545	NA	3355	1032	62		22.4	Recurred/Progressed	Positive	NOT HISPANIC OR LATINO	Core needle biopsy		2012-08-15	C50.9	YES	40	C50.9	8500/3	NO	0	YES	Post (prior bilateral ovariectomy OR >12 mo since LMP with no prior hysterectomy)	21	No	N2a	Stage IIIA		TRUE	A78B04B4-2380-4803-963E-E4E633CD69AB	66E4ECF2-AF70-46C8-BE47-783E8E3EDECD	DECEASED	33.9	DD5295D4-3896-4AA5-AF75-30AEA45D1652	Dead	FEMALE	WITH TUMOR	0	9	19	No	BLACK OR AFRICAN AMERICAN	Primary Tumor
TCGA-A2-A3XT-01	TCGA-A2-A3XT	YES	6th	T2	M0	-16649		0.475	2238	2164	NA	45	YES	83	DiseaseFree	Negative	NOT HISPANIC OR LATINO	Excisional Biopsy		2012-08-17	C50.9	YES	340	C50.9	8500/3	NO	0	YES	Pre (<6 months since LMP AND no prior bilateral ovariectomy AND not on estrogen replacement)	71	No	N1a	Stage IIB	NO	TRUE	C72CB184-462D-4009-9CDB-848782FF8A76	B599719F-F028-45EB-8464-ECF9AD60179F	LIVING	83	A614B6B7-256F-4148-8941-6145B2D9B8B5	Alive	FEMALE	TUMOR FREE	NA	1	13	No	BLACK OR AFRICAN AMERICAN	Primary Tumor
TCGA-A2-A3XU-01	TCGA-A2-A3XU	YES	6th	T2	M0	-13046		0.324	NA	2089	912	35	YES	21.9	Recurred/Progressed	Negative	NOT HISPANIC OR LATINO	Excisional Biopsy		2012-08-29	C50.9	YES	350	C50.9	8500/3	NO	0	YES	Post (prior bilateral ovariectomy OR >12 mo since LMP with no prior hysterectomy)	19	No	N1mi	Stage IIB	YES	TRUE	A8E7D8A4-BBF0-496B-B387-8E014CFDCEA6	6FAE8A0E-A96A-4895-B40D-C1EB491F0F3E	DECEASED	30	5018EC57-96C6-4D63-B708-45559B4D8527	Dead	FEMALE	WITH TUMOR	0	3	12	No	BLACK OR AFRICAN AMERICAN	Primary Tumor
TCGA-A2-A3XV-01	TCGA-A2-A3XV	YES	7th	T2	M0	-16971		0.124	428	344	NA	46	YES	14.1	DiseaseFree	Negative	NOT HISPANIC OR LATINO	Core needle biopsy		2012-08-24	C50.9	YES	360	C50.9	8500/3	NO	0	YES	Pre (<6 months since LMP AND no prior bilateral ovariectomy AND not on estrogen replacement)	40	No	N0	Stage IIA	NO	TRUE	189E1F27-7738-413A-A4D4-97D41D592A13	91D2288C-0D88-4A49-A0E4-0A7D2A95CCC6	LIVING	14.1	405B9D03-6200-4DFA-A7D1-C622D3A48AEA	Alive	FEMALE	TUMOR FREE	0	0	4	No	BLACK OR AFRICAN AMERICAN	Primary Tumor
TCGA-A2-A3XW-01	TCGA-A2-A3XW		7th	T2	M0	-15670		0.001121	1209	1148	NA	42		49.4	DiseaseFree	Negative	NOT HISPANIC OR LATINO	Core needle biopsy		2012-08-15	C50.9	YES	690	C50.9	8500/3	NO	0	YES	Pre (<6 months since LMP AND no prior bilateral ovariectomy AND not on estrogen replacement)	3	No	N1a	Stage IIB		TRUE	C02699B5-580A-4D55-971E-F4692B2CCE57	9D306F32-10BF-4EF7-AC97-91DC07D8EB4A	LIVING	49.4	A4621FE7-E898-40BA-B45E-3DC9EF607F37	Alive	FEMALE	TUMOR FREE	0	3	18	No	BLACK OR AFRICAN AMERICAN	Primary Tumor
TCGA-A2-A3XX-01	TCGA-A2-A3XX		7th	T2	M0	-17981		0.555	1168	1143	NA	49		NA		Negative	NOT HISPANIC OR LATINO	Core needle biopsy		2012-08-15	C50.9	YES	780	C50.9	8500/3	NO	0	YES	Post (prior bilateral ovariectomy OR >12 mo since LMP with no prior hysterectomy)	34	No	N0	Stage IIA		TRUE	53886143-C1C6-40E9-88E6-E4E5E0271FC8	0A1F4A81-38C6-407A-A33B-716A0F9A6B4D	DECEASED	47.3	770EEADF-19CD-4AB9-A7FA-1A05EE17984C	Dead	FEMALE	TUMOR FREE	0	0	1	No	BLACK OR AFRICAN AMERICAN	Primary Tumor
TCGA-A2-A3XY-01	TCGA-A2-A3XY		7th	T2	M0	-18059		0.137	786	703	NA	49		26.7	Recurred/Progressed	Negative	NOT HISPANIC OR LATINO	Core needle biopsy		2012-08-14	C50.9	YES	950	C50.4	8500/3	NO	0	YES	Post (prior bilateral ovariectomy OR >12 mo since LMP with no prior hysterectomy)	42	No	N1a	Stage IIB		TRUE	DEBA32E4-0E68-4711-941B-3B63BD965AFB	DA7FE5E0-6AE0-47F0-9B32-FB6B80C4BE38	LIVING	35	EC1BB6E8-6897-4E70-80A6-5A4E4B9C4E1F	Alive	FEMALE	TUMOR FREE	NA	3	16	No	BLACK OR AFRICAN AMERICAN	Primary Tumor
TCGA-A2-A3XZ-01	TCGA-A2-A3XZ	YES	7th	T1c	M0	-16978		0.116	973	909	NA	46	NO	32	DiseaseFree	Negative	NOT HISPANIC OR LATINO	Core needle biopsy		2012-08-21	C50.9	YES	1100	C50.9	8500/3	NO	0	YES	Pre (<6 months since LMP AND no prior bilateral ovariectomy AND not on estrogen replacement)	37	No	N0	Stage IA	NO	TRUE	FE7F74B8-20F4-4471-91DC-4CCA8C68E5C0	6B746708-F6EF-45CD-B877-AFA1949D1D78	LIVING	32	A7B6FCF6-1B81-40B5-AD92-54681CBC8FE0	Alive	FEMALE	TUMOR FREE	0	0	3	No	BLACK OR AFRICAN AMERICAN	Primary Tumor
TCGA-A2-A3Y0-01	TCGA-A2-A3Y0	YES	7th	T2	M0	-21024		0.431	859	845	NA	57	NO	38.3	DiseaseFree	Close	NOT HISPANIC OR LATINO	Core needle biopsy		2012-08-24	C50.9	YES	850	C50.4	8500/3	NO	0	YES	Post (prior bilateral ovariectomy OR >12 mo since LMP with no prior hysterectomy)	147	No	N1a	Stage IIB	NO	TRUE	174850B4-5EC2-462B-A890-89BD1716B3C2	CAA2D510-9024-4D7D-B0EF-80FA4BE1E2EE	LIVING	38.3	0FEAEEBA-A72C-4207-AC21-6AF5B5ED1AFC	Alive	FEMALE	TUMOR FREE	0	1	39	No	BLACK OR AFRICAN AMERICAN	Primary Tumor
TCGA-A7-A0CD-01	TCGA-A7-A0CD		6th	T1	M0	-24242		0.584	171	157	NA	66		38.3	DiseaseFree	Negative	NOT HISPANIC OR LATINO	Core needle biopsy		2010-10-05	C50.9	YES	420	C50.9	8500/3	NO	0		Indeterminate (neither Pre or Postmenopausal)	25	No	N0	Stage I		FALSE	09765b0a-94f6-47d2-af56-93368084ac3a	69886602-a4f1-4ad4-ba56-a0e031c2e295	LIVING	38.3	DEB67EB8-155C-4ACF-B3D4-595E4CBE2E5C	Alive	FEMALE	TUMOR FREE	NA	0	2	Yes	WHITE	Primary Tumor
TCGA-A7-A0CE-01	TCGA-A7-A0CE			T2	M0	-20863		0.5	254	129	NA	57		35.3	DiseaseFree	Negative	NOT HISPANIC OR LATINO	Core needle biopsy		2010-10-04	C50.9	YES	330	C50.9	8500/3	NO	0		Indeterminate (neither Pre or Postmenopausal)	97	No	N0 (i-)	Stage IIA		FALSE	9d95a65b-e41d-4f93-92d4-99dce29ff40d	9dc315ce-3b76-4754-b103-2c2580cde4ab	LIVING	35.3	8A853D7F-979F-4112-9659-1FDE84EF5102	Alive	FEMALE	TUMOR FREE	0	0	1	No	WHITE	Primary Tumor
TCGA-A7-A0CG-01	TCGA-A7-A0CG			T2	M0	-28596		0.122	167	93	NA	78		34.3	DiseaseFree	Close	NOT HISPANIC OR LATINO	Core needle biopsy		2010-10-07	C50.9	YES	200	C50.9	8522/3	NO	0		Post (prior bilateral ovariectomy OR >12 mo since LMP with no prior hysterectomy)	37	No	N0 (i-)	Stage IIA		FALSE	67eef990-5ff4-45d1-843d-d22d7848f130	f2deda2c-63c8-4b4f-a725-381f00298cd0	LIVING	34.3	2BE28F5D-2DBB-476F-9AFF-6B2103ECF0CE	Alive	FEMALE	TUMOR FREE	0	0	5	No	WHITE	Primary Tumor
TCGA-A7-A0CH-01	TCGA-A7-A0CH			T2	M0	-29104		0.0627	162	121	NA	79		35.5	DiseaseFree	Negative	NOT HISPANIC OR LATINO	Core needle biopsy		2010-10-04	C50.9	YES	360	C50.9	8500/3	NO	0		Post (prior bilateral ovariectomy OR >12 mo since LMP with no prior hysterectomy)	34	No	N0 (i-)	Stage IIA		FALSE	9de678e5-67ed-4453-a98b-7ac351d5d0f1	1a9f7284-9770-4936-9fa4-500698184680	LIVING	35.5	F70DA7E5-2AB3-487F-8B2C-72EEE91E58E0	Alive	FEMALE	TUMOR FREE	0	0	2	No	WHITE	Primary Tumor
TCGA-A7-A0CJ-01	TCGA-A7-A0CJ			T2	M0	-21014		0.565	189	36	NA	57		30.6	DiseaseFree	Positive	NOT HISPANIC OR LATINO	Core needle biopsy		2010-10-07	C50.9	YES	310	C50.9	8500/3	NO	0		Post (prior bilateral ovariectomy OR >12 mo since LMP with no prior hysterectomy)	47	No	N0 (i-)	Stage IIA		FALSE	d69e59a8-b10b-46f5-b859-b6c178d90506	5c28c3b3-1dfe-46ac-83f6-dd5cdb47d813	LIVING	30.6	019F390D-7479-4CDC-8C82-45A27910E782	Alive	FEMALE	TUMOR FREE	0	0	1	No	WHITE	Primary Tumor
TCGA-A7-A0D9-01	TCGA-A7-A0D9			T2	M0	-13836		0.187	160	173	NA	37		37.4	DiseaseFree	Negative	NOT HISPANIC OR LATINO	Core needle biopsy		2010-10-04	C50.9	YES	1760	C50.9	8500/3	NO	0		Pre (<6 months since LMP AND no prior bilateral ovariectomy AND not on estrogen replacement)	27	No	N0 (i-)	Stage IIA		FALSE	17baef7c-d97d-4b98-ab53-503ef856523d	c144ae50-ed29-4e27-bbee-fa81e79ac7db	LIVING	37.4	7D5763F7-7284-4AF5-BBFC-5D8B5CB7F495	Alive	FEMALE	TUMOR FREE	0	0	1	No	WHITE	Primary Tumor
TCGA-A7-A0DA-01	TCGA-A7-A0DA			T2	M0	-22708		0.756	373	177	NA	62		35.6	DiseaseFree	Negative	NOT HISPANIC OR LATINO	Core needle biopsy		2011-01-10	C50.9	YES	350	C50.9	8500/3	NO	0		Post (prior bilateral ovariectomy OR >12 mo since LMP with no prior hysterectomy)	125	No	N0 (i-)	Stage IIA		FALSE	3afa1e93-1df8-4e4c-aaa4-557463f4bb77	4f441e61-6bea-4a12-841d-def270804bbe	LIVING	35.6	69AC5937-3FFD-40FB-9922-79DB3CED7510	Alive	FEMALE	TUMOR FREE	NA	0	1	No	WHITE	Primary Tumor
TCGA-A7-A0DB-01	TCGA-A7-A0DB			T2	M0	-20570		0.33	141	167	NA	56		33.1	DiseaseFree	Close	NOT HISPANIC OR LATINO	Core needle biopsy		2010-10-04	C50.9	YES	300	C50.9	8500/3	NO	0		Post (prior bilateral ovariectomy OR >12 mo since LMP with no prior hysterectomy)	63	No	N0 (i-)	Stage IIA		FALSE	f130f376-5801-40f9-975d-a7e2f7b5670d	e8cb34ed-67cb-48b7-83cd-621a1224e781	LIVING	33.1	511CB4C5-FCEE-4EC4-98A4-4DD32ECA83C3	Alive	FEMALE	TUMOR FREE	0	0	4	No	WHITE	Primary Tumor
TCGA-A7-A13D-01	TCGA-A7-A13D			T2	M0	-17070		0.782	267	240	NA	46		31.7	DiseaseFree	Close	NOT HISPANIC OR LATINO	Core needle biopsy		2011-02-23	C50.9	YES	240	C50.9	8500/3	NO	0		Post (prior bilateral ovariectomy OR >12 mo since LMP with no prior hysterectomy)	97	No	N0 (i-)	Stage IIA		FALSE	8785012f-f73e-4d68-87cf-1d804af32782	79fc9ed3-4e96-4c0e-869e-1756cbdabb39	LIVING	31.7	6F3784B2-4A75-447C-9EAE-F146461C737E	Alive	FEMALE	TUMOR FREE	NA	0	4	No	BLACK OR AFRICAN AMERICAN	Primary Tumor
TCGA-A7-A13E-01	TCGA-A7-A13E			T2	MX	-22690		0.651	287	220	NA	62		18.3	Recurred/Progressed	Negative	NOT HISPANIC OR LATINO	Core needle biopsy		2011-02-28	C50.9	YES	730	C50.9	8500/3	NO	0		Post (prior bilateral ovariectomy OR >12 mo since LMP with no prior hysterectomy)	133	No	N1	Stage IIB		FALSE	8c7e74e0-71ef-49b8-9217-94b8ef740ef9	8a790c78-8ad4-4e0b-9728-0e24cadc1f98	DECEASED	20.2	2180850C-CC8D-4376-B2EE-1ADC3F5B3EC1	Dead	FEMALE	TUMOR FREE	NA	2	12	No	WHITE	Primary Tumor
TCGA-A7-A13F-01	TCGA-A7-A13F			T3	M0	-16363		0.261	196	121	NA	44		12.7	DiseaseFree	Negative	NOT HISPANIC OR LATINO	Core needle biopsy		2011-03-02	C50.9	YES	600	C50.9	8500/3	NO	0		Pre (<6 months since LMP AND no prior bilateral ovariectomy AND not on estrogen replacement)	32	No	N1a	Stage IIIA		FALSE	2cf68894-168b-458b-af4f-53cad72989a8	b36c8878-bab6-4f61-9a4e-4dcfca21391e	LIVING	12.7	D64FFDC0-38BB-456E-9621-AF89B79D0C68	Alive	FEMALE	TUMOR FREE	NA	3	11	No	WHITE	Primary Tumor
TCGA-A7-A13G-01	TCGA-A7-A13G		7th	T2	MX	-28969		0.115	208	69	NA	79		19.3	Recurred/Progressed	Negative	NOT HISPANIC OR LATINO	Core needle biopsy		2011-05-16	C50.9	YES	120	C50.9	8500/3	NO	0	YES	Post (prior bilateral ovariectomy OR >12 mo since LMP with no prior hysterectomy)	20	No	N0	Stage IIA		FALSE	6cd9baf5-bbe0-4c1e-a87f-c53b3af22890	6a1c2fdb-18ce-40ec-af79-191b489f39a7	LIVING	23.6	50782829-35B6-4A61-A3CE-F105A31EDB42	Alive	FEMALE	TUMOR FREE	NA	0	1	Yes	WHITE	Primary Tumor
TCGA-A7-A13H-01	TCGA-A7-A13H		7th	T2	MX	-22643		0.121	551	62	NA	61		26.1	Recurred/Progressed	Negative	NOT HISPANIC OR LATINO	Core needle biopsy		2012-06-22	C50.9	YES	140	C50.9	8520/3	NO	0	YES	Post (prior bilateral ovariectomy OR >12 mo since LMP with no prior hysterectomy)	25	No	N1a	Stage IIB		FALSE	2E243F0E-9D7D-4CB0-9678-70607F90430A	5AE24B78-4C64-4A08-BD13-3D58182215AD	LIVING	29.5	642B4B50-E227-4484-904E-E629F7F9DBC1	Alive	FEMALE	TUMOR FREE	2	2	12	No	WHITE	Primary Tumor
TCGA-A7-A26E-01	TCGA-A7-A26E		7th	T3	MX	-26274		0.107	421	372	NA	71		31.3	DiseaseFree	Negative	NOT HISPANIC OR LATINO	Core needle biopsy		2011-07-28	C50.9	YES	230	C50.9	8520/3	NO	0	YES	Post (prior bilateral ovariectomy OR >12 mo since LMP with no prior hysterectomy)	40	No	N1a	Stage IIIA		FALSE	011b9b2d-ebe5-42bf-9662-d922faccc7a1	d6023f30-0d07-4839-98d1-0b22b366cc51	LIVING	31.3	EA830A26-3DF5-4731-AD0A-F20A61D58817	Alive	FEMALE	TUMOR FREE	NA	0	16	Yes	WHITE	Primary Tumor
TCGA-A7-A26F-01	TCGA-A7-A26F		7th	T1	M0	-20210		0.318	257	173	NA	55		24.2	DiseaseFree	Close	NOT HISPANIC OR LATINO	Fine needle aspiration biopsy		2011-08-08	C50.9	YES	190	C50.9	8575/3	NO	0	YES	Post (prior bilateral ovariectomy OR >12 mo since LMP with no prior hysterectomy)	69	No	N0	Stage IA		FALSE	3b7b9c1e-a84c-47ed-983c-9e4b00cbf01a	0edccd9b-72e9-4c69-899e-4bba4dbacb40	LIVING	24.2	46A75AD3-BAD1-4A16-873E-0099BD10FA8C	Alive	FEMALE		NA	0	1	Yes	WHITE	Primary Tumor
TCGA-A7-A26G-01	TCGA-A7-A26G		7th	T2	M0	-18362		0.249	210	161	NA	50		23.7	DiseaseFree	Negative	NOT HISPANIC OR LATINO	Core needle biopsy		2011-08-10	C50.9	YES	410	C50.9	8575/3	NO	0	YES	Pre (<6 months since LMP AND no prior bilateral ovariectomy AND not on estrogen replacement)	48	No	N0 (i+)	Stage IIA		FALSE	5ed024e8-d05e-4c65-9441-eda9930ccc82	f0cf4acd-6b09-4538-b58c-e86c623b6c71	LIVING	23.7	6BE810A6-3D30-4F75-89B7-00C866553165	Alive	FEMALE		NA	0	2	No	BLACK OR AFRICAN AMERICAN	Primary Tumor
TCGA-A7-A26H-01	TCGA-A7-A26H		7th	T1	M0	-26423		0.222	65	79	NA	72		10.2	Recurred/Progressed	Negative	NOT HISPANIC OR LATINO	Core needle biopsy		2011-08-04	C50.9	YES	280	C50.9	8500/3	NO	0	YES	Post (prior bilateral ovariectomy OR >12 mo since LMP with no prior hysterectomy)	92	No	N1a	Stage IIA		FALSE	dddd8e2f-e540-418a-b02e-698d18a12c14	7de9f347-2a8b-4647-bd46-011d74fc48fc	LIVING	23.8	1159E2EF-6407-4D90-8ED6-7AB04CF4FB32	Alive	FEMALE		1	0	5	Yes	WHITE	Primary Tumor
TCGA-A7-A26I-01	TCGA-A7-A26I		7th	T2	M0	-23948		0.659	122	40	NA	65		21.7	DiseaseFree	Close	NOT HISPANIC OR LATINO	Fine needle aspiration biopsy		2011-07-29	C50.9	YES	120	C50.9	8500/3	NO	0	YES	Post (prior bilateral ovariectomy OR >12 mo since LMP with no prior hysterectomy)	35	No	N0	Stage IIA		FALSE	b2ecbc0f-2c30-4200-8d5e-7b95424bcadb	e2b02d95-df95-48ad-b26f-3eb15201969d	LIVING	21.7	CCE33A95-774E-4242-B2A1-05FF002ED1D9	Alive	FEMALE		NA	0	2	Yes	WHITE	Primary Tumor
TCGA-A7-A26J-01	TCGA-A7-A26J		7th	T2	M0	-17930		0.392	68	54	NA	49		20.6	DiseaseFree	Negative	NOT HISPANIC OR LATINO	Core needle biopsy		2011-07-28	C50.9	YES	60	C50.9	8500/3	NO	0	YES	Pre (<6 months since LMP AND no prior bilateral ovariectomy AND not on estrogen replacement)	129	No	N0	Stage IIA		FALSE	6cb6f179-defd-4661-af0a-c353b74c0c49	31a140ce-bcb7-46b4-8105-626c9db1e183	LIVING	20.6	5CC0C09F-70F6-458A-B8E6-18BDC074BE74	Alive	FEMALE	WITH TUMOR	NA	0	4	No	WHITE	Primary Tumor
TCGA-A7-A2KD-01	TCGA-A7-A2KD		7th	T2	MX	-19563		0.376	182	141	NA	53		22.3	DiseaseFree	Negative	NOT HISPANIC OR LATINO	Core needle biopsy		2011-10-11	C50.9	YES	260	C50.9	8500/3	NO	0	YES	Post (prior bilateral ovariectomy OR >12 mo since LMP with no prior hysterectomy)	27	No	N2a	Stage IIIA		FALSE	92654F8D-5137-4FFD-AAA3-5AE38EB88226	C685196B-C3CF-49FA-AAE4-F6CCBE04779F	LIVING	22.3	3C301346-4594-4071-A754-04F8B3BE894C	Alive	FEMALE		0	8	10	Yes	BLACK OR AFRICAN AMERICAN	Primary Tumor
TCGA-A7-A3IY-01	TCGA-A7-A3IY		7th	T1c	M0	-26042		0.007919	151	143	NA	71		11.3	DiseaseFree	Close	NOT HISPANIC OR LATINO	Core needle biopsy		2012-03-19	C50.9	YES	130	C50.9	8480/3	NO	0	YES	Post (prior bilateral ovariectomy OR >12 mo since LMP with no prior hysterectomy)	14	No	N0	Stage I		FALSE	6B4E0262-F589-4532-B578-9F2D76C19D90	FC56BE13-C3DD-4DD9-8C34-DC6C7F9D1E16	LIVING	11.3	63F5F3D8-6393-4DA7-BB74-7D587199D7FD	Alive	FEMALE	TUMOR FREE	NA	0	1	No	WHITE	Primary Tumor
TCGA-A7-A3IZ-01	TCGA-A7-A3IZ		7th	T2	M0	-22997		0.173	148	86	NA	62		10.6	DiseaseFree	Positive	NOT HISPANIC OR LATINO	Core needle biopsy		2012-03-12	C50.9	YES	290	C50.9	8520/3	NO	0	YES	Post (prior bilateral ovariectomy OR >12 mo since LMP with no prior hysterectomy)	67	No	N0 (i+)	Stage IIA		FALSE	15FF4B02-BB69-4D24-8A07-B82F428E428D	8BA93AD6-932D-42C9-8268-DDDA46802057	LIVING	10.6	90F83655-038B-412C-91BD-84CC3A4201D4	Alive	FEMALE	TUMOR FREE	1	NA	1	No	WHITE	Primary Tumor
TCGA-A7-A3J0-01	TCGA-A7-A3J0		7th	T2	M0	-22672		0.224	76	78	NA	62		10.3	DiseaseFree	Negative	NOT HISPANIC OR LATINO	Core needle biopsy		2012-03-13	C50.9	YES	110	C50.9	8480/3	NO	0	YES	Post (prior bilateral ovariectomy OR >12 mo since LMP with no prior hysterectomy)	28	No	N0	Stage IIA		FALSE	DA70CF7E-0E61-4C72-B4C5-C408569D11B8	025EAC6D-539E-4E43-A6F7-4A2D2DEF571D	LIVING	10.3	A5AED5F0-A144-4615-AF78-539B8523D15F	Alive	FEMALE	TUMOR FREE	NA	0	2	No	WHITE	Primary Tumor
TCGA-A7-A3J1-01	TCGA-A7-A3J1		7th	T1c	MX	-23209		0.215	75	49	NA	63		11.3	DiseaseFree	Negative	NOT HISPANIC OR LATINO	Core needle biopsy		2012-03-12	C50.9	YES	100	C50.9	8520/3	NO	0	YES	Post (prior bilateral ovariectomy OR >12 mo since LMP with no prior hysterectomy)	17	No	N0	Stage IA		FALSE	8F9AD301-6699-4078-A80D-886E40894AF7	112C8CDD-A187-4D9F-8C71-400848804D32	LIVING	11.3	D8EFFB62-6A23-4033-8144-24B751DECB08	Alive	FEMALE	TUMOR FREE	NA	0	1	Yes	WHITE	Primary Tumor
TCGA-A7-A3RF-01	TCGA-A7-A3RF		7th	T2	M0	-29184		0.00225	54	61	NA	79		6.31	Recurred/Progressed	Positive	NOT HISPANIC OR LATINO	Core needle biopsy		2012-05-03	C50.9	YES	190	C50.9	8520/3	NO	0	YES	Post (prior bilateral ovariectomy OR >12 mo since LMP with no prior hysterectomy)	45	No	N0	Stage IIA		FALSE	7451AF3C-ACC0-4D79-8429-6B8BE96911D8	2868849C-2BA4-42DE-AEF2-028BF68F4CB3	LIVING	13.4	4AF67A51-97C1-4D58-9E60-03FDFFACD38A	Alive	FEMALE	TUMOR FREE	NA	0	2	No	WHITE	Primary Tumor
TCGA-A7-A426-01	TCGA-A7-A426	YES	7th	T3	MX	-18296		0.171	229	132	NA	50	YES	12	DiseaseFree	Negative	NOT HISPANIC OR LATINO	Core needle biopsy		2012-11-05	C50.9	YES	180	C50.9	8520/3	NO	0	YES	Pre (<6 months since LMP AND no prior bilateral ovariectomy AND not on estrogen replacement)	28	No	N3a	Stage IIIC	[Unknown]	FALSE	D48E9F25-F083-4F88-A92D-C12D9F765BA6	3374057F-4159-464C-B6C3-276BB12A8902	LIVING	12	B644AEB6-7D46-4D4D-BA00-D42BCDDCB164	Alive	FEMALE	[Unknown]	NA	13	20	Yes	WHITE	Primary Tumor
TCGA-A8-A06N-01	TCGA-A8-A06N		6th	T4b	M0	-24288		0.558	0	241	NA	66		0	DiseaseFree	Negative				2011-05-27	C50.9	YES	510	C50.9	8500/3	NO	0		Post (prior bilateral ovariectomy OR >12 mo since LMP with no prior hysterectomy)	34	No	N0	Stage IIIB		FALSE	3a711140-1b89-4611-9992-3861e3d0e01a	600df455-fdf4-4955-8d65-236b7b112693	LIVING	0	2F0333BC-E9BB-4903-B3E2-8AE241DDDF84	Alive	FEMALE	TUMOR FREE	NA	NA	NA	No		Primary Tumor
TCGA-A8-A06O-01	TCGA-A8-A06O		6th	T1c	M0	-22157		0.391	396	272	NA	60		13	DiseaseFree	Negative				2011-05-27	C50.9	YES	100	C50.9	8500/3	NO	0		Post (prior bilateral ovariectomy OR >12 mo since LMP with no prior hysterectomy)	64	No	N0	Stage I		FALSE	69054195-9e93-49e5-b820-69b0091cc2d4	3ee32152-2834-4137-a6e8-254f3cca6b6e	LIVING	13	EB9B8904-F6CC-451F-8628-50CC71F1F7C3	Alive	FEMALE	TUMOR FREE	NA	NA	NA	No		Primary Tumor
TCGA-A8-A06P-01	TCGA-A8-A06P		6th	T1c	M0	-23011		0.0945	396	241	NA	63		13	DiseaseFree	Negative				2011-05-27	C50.9	YES	210	C50.9	8500/3	NO	0		Post (prior bilateral ovariectomy OR >12 mo since LMP with no prior hysterectomy)	39	No	N2a	Stage IIIA		FALSE	5f90d955-bbb0-4b44-a5ac-ba6fda9ca0fb	bdcd6720-fcbf-4c64-8703-b8932472ad19	LIVING	13	AADFAF8B-92B8-4292-96A3-912D55EB9C31	Alive	FEMALE	TUMOR FREE	NA	NA	NA	No		Primary Tumor
TCGA-A8-A06Q-01	TCGA-A8-A06Q		5th	T3	M0	-23164		0.655	31	1184	NA	63		1.02	DiseaseFree	Negative				2011-05-27	C50.9	YES	50	C50.4	8500/3	NO	0		Post (prior bilateral ovariectomy OR >12 mo since LMP with no prior hysterectomy)	185	No	N2	Stage IIIA		FALSE	281f70c5-876f-44b3-84fb-f2302f85e74c	a03cd506-47aa-4333-a9a4-fa1a6815ac75	LIVING	1.02	8FE77EF7-C83A-431F-B3BA-D93B5ECC70AF	Alive	FEMALE	TUMOR FREE	NA	NA	NA	No		Primary Tumor
TCGA-A8-A06R-01	TCGA-A8-A06R		5th	T2	M0	-25477		0.593	547	1184	NA	69		18	DiseaseFree	Negative				2011-05-27	C50.9	YES	220	C50.4	8500/3	NO	0		Post (prior bilateral ovariectomy OR >12 mo since LMP with no prior hysterectomy)	59	No	N1a	Stage IIB		FALSE	f3ba71f9-25f3-4784-bf2d-3aa522a0cba8	7fa91f3b-34db-41ba-8447-d745eebac2db	LIVING	18	B6B7939C-63AF-4B52-B494-AA09A9C03871	Alive	FEMALE	TUMOR FREE	NA	NA	NA	No		Primary Tumor
TCGA-A8-A06T-01	TCGA-A8-A06T		6th	T3	M0	-27393		0.771	1249	941	NA	75		41	DiseaseFree	Negative				2011-05-27	C50.9	YES	110	C50.4	8500/3	NO	0		Post (prior bilateral ovariectomy OR >12 mo since LMP with no prior hysterectomy)	26	No	N1a	Stage IIIA		FALSE	2c04a2f5-321e-4dea-8e00-268325da65cb	7b80a02f-c065-4ec2-95fc-05baf0aa3926	LIVING	41	5D888D65-685F-4598-884F-AD057DE5FD1D	Alive	FEMALE	TUMOR FREE	NA	NA	NA	Yes		Primary Tumor
TCGA-A8-A06U-01	TCGA-A8-A06U		6th	T2	M0	-29525		0.619	NA	759	883	80		NA		Negative				2011-05-27	C50.9	YES	250	C50.4	8500/3	NO	0		Post (prior bilateral ovariectomy OR >12 mo since LMP with no prior hysterectomy)	58	No	N1a	Stage IIB		FALSE	6bc4c56d-aac5-49a2-9913-9538d06d898f	d1224e18-6c94-45f7-afb0-d4321150cc8f	DECEASED	29	A314FB55-F20A-4485-965D-D7894D070A16	Dead	FEMALE	TUMOR FREE	NA	NA	NA	Yes		Primary Tumor
TCGA-A8-A06X-01	TCGA-A8-A06X		6th	T3	M0	-28338		0.603	NA	1276	943	77		NA		Negative				2011-05-27	C50.9	YES	760	C50.4	8500/3	NO	0		Post (prior bilateral ovariectomy OR >12 mo since LMP with no prior hysterectomy)	167	No	N0	Stage IIB		FALSE	70931617-b3df-4a12-8e3f-2b2307602f48	504ec583-0496-4d64-bcc9-aa52868cc9f2	DECEASED	31	738B601A-24D8-4261-B000-198648213070	Dead	FEMALE	TUMOR FREE	NA	NA	NA	No		Primary Tumor
TCGA-A8-A06Y-01	TCGA-A8-A06Y		6th	T2	M0	-24442		0.304	791	667	NA	66		26	DiseaseFree	Negative				2011-05-27	C50.9	YES	130	C50.4	8500/3	NO	0		Post (prior bilateral ovariectomy OR >12 mo since LMP with no prior hysterectomy)	25	No	N0	Stage IIA		FALSE	515b1400-e896-4f2a-81bd-70895441a0bd	dac9090c-fae9-4d99-b5d7-fc3c8b6a201a	LIVING	26	5664F531-9D45-4302-A455-63E46B5EDD26	Alive	FEMALE	TUMOR FREE	NA	NA	NA	No		Primary Tumor
TCGA-A8-A06Z-01	TCGA-A8-A06Z		6th	T3	M0	-30984		0.707	31	1003	NA	84		1.02	DiseaseFree					2011-05-27	C50.9	YES	330	C50.4	8500/3	NO	0		Post (prior bilateral ovariectomy OR >12 mo since LMP with no prior hysterectomy)	54	No	N0	Stage IIB		FALSE	2399caeb-ead2-4003-af38-809db4ac2e2b	993d2cba-b4f8-4a46-994b-b97bb9f10d34	LIVING	1.02	956F45E5-A8C6-4A4A-9D1F-D31912180584	Alive	FEMALE		NA	NA	NA	No		Primary Tumor
TCGA-A8-A075-01	TCGA-A8-A075		6th	T2	M0	-15369		0.503	518	394	NA	42		17	DiseaseFree	Negative				2011-05-27	C50.9	YES	120	C50.4	8500/3	NO	0		Pre (<6 months since LMP AND no prior bilateral ovariectomy AND not on estrogen replacement)	64	No	N1a	Stage IIB		FALSE	7861a5f2-8910-4bcb-9c34-f79c5acd6e21	d3263082-946d-4420-8a63-8d67eeee09c5	LIVING	17	6643B290-5D7A-4649-B57D-47A5BA4E8D31	Alive	FEMALE	TUMOR FREE	NA	NA	NA	No		Primary Tumor
TCGA-A8-A076-01	TCGA-A8-A076		5th	T2	M0	-24230		0.553	1642	1518	NA	66		53.9	DiseaseFree	Negative				2011-05-27	C50.9	YES	210	C50.4	8500/3	NO	0		Post (prior bilateral ovariectomy OR >12 mo since LMP with no prior hysterectomy)	47	No	N0	Stage IIA		FALSE	23dabeef-8e3c-44bc-9a12-a9522d17be5c	750932d7-0e9d-44e0-bc5a-6031ca4b0448	LIVING	53.9	DD669244-34D8-4725-A52C-F3AAF59852F9	Alive	FEMALE	TUMOR FREE	NA	NA	NA	No		Primary Tumor
TCGA-A8-A079-01	TCGA-A8-A079		5th	T4b	M0	-25294		0.364	274	1033	NA	69		9	DiseaseFree	Negative				2011-05-27	C50.9	YES	380	C50.4	8500/3	NO	0		Post (prior bilateral ovariectomy OR >12 mo since LMP with no prior hysterectomy)	49	No	N3	Stage IIIB		FALSE	31c31cce-1b4d-4f12-922f-84f389403170	ce2a0734-ea41-4e2c-87dd-516f6e5b83d6	LIVING	9	81ADDBAB-C02F-4DA8-9429-76293FB42E42	Alive	FEMALE	TUMOR FREE	NA	NA	NA	No		Primary Tumor
TCGA-A8-A07B-01	TCGA-A8-A07B		6th	T2	M0	-25475		0.384	1004	880	NA	69		33	DiseaseFree	Negative				2011-05-27	C50.9	YES	90	C50.4	8500/3	NO	0		Post (prior bilateral ovariectomy OR >12 mo since LMP with no prior hysterectomy)	55	No	N0	Stage IIA		FALSE	b43e41af-1d82-4b5f-b8f1-add0510e6b86	685fa2ea-3dff-450a-8ea6-e97dfe9000a4	LIVING	33	F24A752C-1AAE-4C70-B6D4-DD0E8C89D9AA	Alive	FEMALE	TUMOR FREE	NA	NA	NA	No		Primary Tumor
TCGA-A8-A07E-01	TCGA-A8-A07E		6th	T4b	MX	-29800		0.214	608	545	NA	81		20	DiseaseFree	Negative				2011-05-27	C50.9	YES	260	C50.4	8500/3	NO	0		Post (prior bilateral ovariectomy OR >12 mo since LMP with no prior hysterectomy)	68	No	N3a	Stage X		FALSE	853456d8-2367-404e-abc9-020fe8bbd209	059a543a-4408-4c82-96ef-eae1cc126763	LIVING	20	E20AC0FF-43C4-49EA-9E33-764E553933B7	Alive	FEMALE	TUMOR FREE	NA	NA	NA	Yes		Primary Tumor
TCGA-A8-A07F-01	TCGA-A8-A07F		6th	T2	M0	-23742		0.61	577	453	NA	65		19	DiseaseFree	Negative				2011-05-27	C50.9	YES	150	C50.4	8500/3	NO	0		Post (prior bilateral ovariectomy OR >12 mo since LMP with no prior hysterectomy)	25	No	N1a	Stage IIB		FALSE	5d688049-f271-40ef-813a-d37240ffe21c	f411d1ba-697f-4759-afb1-89eaa56e6da7	LIVING	19	D1456192-83E7-4FC8-B783-90D615830156	Alive	FEMALE	TUMOR FREE	NA	NA	NA	No		Primary Tumor
TCGA-A8-A07G-01	TCGA-A8-A07G		6th	T1c	M0	-23926		0.287	577	453	NA	65		19	DiseaseFree	Negative				2011-05-27	C50.9	YES	60	C50.4	8500/3	NO	0		Post (prior bilateral ovariectomy OR >12 mo since LMP with no prior hysterectomy)	48	No	N1a	Stage IIA		FALSE	8cf8b620-7ab6-4b6e-84bc-ff5a83f381fa	32ed93a7-250a-4fd4-81a8-6d94a6bc9f33	LIVING	19	1ED901DF-BCDC-44C8-A7DF-AB895ECA0952	Alive	FEMALE	TUMOR FREE	NA	NA	NA	No		Primary Tumor
TCGA-A8-A07I-01	TCGA-A8-A07I		6th	T2	M0	-25263		0.245	426	302	NA	69		14	DiseaseFree	Negative				2011-05-27	C50.9	YES	130	C50.4	8500/3	NO	0		Post (prior bilateral ovariectomy OR >12 mo since LMP with no prior hysterectomy)	39	No	N2a	Stage IIIA		FALSE	566792ae-f853-4a47-856d-f02cdcfcb18a	0d2e50fa-daef-45a3-97b2-5d71ab03cfbf	LIVING	14	5DA3A8E1-7EE6-45EC-89EC-69423E2B866B	Alive	FEMALE	TUMOR FREE	NA	NA	NA	No		Primary Tumor
TCGA-A8-A07J-01	TCGA-A8-A07J		6th	T2	M0	-12965		0.161	365	241	NA	35		12	DiseaseFree	Negative				2011-05-27	C50.9	YES	130	C50.4	8500/3	NO	0		Pre (<6 months since LMP AND no prior bilateral ovariectomy AND not on estrogen replacement)	36	No	N1a	Stage IIB		FALSE	316625b8-a217-4829-90d1-dfd9cb7e4bc3	e7008896-7348-4b14-a443-d9da1352c80e	LIVING	12	2243F29C-191C-4D33-8483-09BB3AD36598	Alive	FEMALE	TUMOR FREE	NA	NA	NA	No		Primary Tumor
TCGA-A8-A07L-01	TCGA-A8-A07L		6th	T3	M0	-21428		0.459	518	394	NA	58		17	DiseaseFree	Negative				2011-05-27	C50.9	YES	80	C50.4	8500/3	NO	0		Post (prior bilateral ovariectomy OR >12 mo since LMP with no prior hysterectomy)	89	No	N1a	Stage IIIA		FALSE	e89a9deb-6321-4e61-b412-b4993d4277dd	e5bfc024-9ee5-4e37-97ee-45e695489f8d	LIVING	17	5D93AE27-79A0-4809-AE7C-54814CED0851	Alive	FEMALE	TUMOR FREE	NA	NA	NA	No		Primary Tumor
TCGA-A8-A07O-01	TCGA-A8-A07O		6th	T2	M0	-18870		0.314	304	180	NA	51		9.99	DiseaseFree	Negative				2011-05-27	C50.9	YES	220	C50.4	8500/3	NO	0		Post (prior bilateral ovariectomy OR >12 mo since LMP with no prior hysterectomy)	38	No	N0	Stage IIA		FALSE	cf9db1af-17f0-490e-8139-142bd704763a	2d80cd9e-8906-4fc9-9645-b3c137d71dc7	LIVING	9.99	9ECA4450-A550-44DE-B2E5-FD1CFF02A9FE	Alive	FEMALE	TUMOR FREE	NA	NA	NA	No		Primary Tumor
TCGA-A8-A07P-01	TCGA-A8-A07P		6th	T2	M0	-24929		0.283	334	210	NA	68		11	DiseaseFree	Negative				2011-05-27	C50.9	YES	120	C50.4	8500/3	NO	0		Post (prior bilateral ovariectomy OR >12 mo since LMP with no prior hysterectomy)	44	No	N1	Stage IIB		FALSE	8cccf160-93e9-48a5-9b8b-54aa50153142	b16578d4-4d04-430d-8f9c-168ec0288cf1	LIVING	11	6C7D956E-1247-4663-9ED5-D406AE6E2959	Alive	FEMALE	TUMOR FREE	NA	NA	NA	No		Primary Tumor
TCGA-A8-A07R-01	TCGA-A8-A07R		6th	T2	M0	-29251		0.704	273	149	NA	80		8.97	DiseaseFree	Positive				2011-05-27	C50.9	YES	170	C50.4	8500/3	NO	0			372	No	N3a	Stage IIIC		FALSE	72e486b8-a866-4916-b2e4-8b4bb5dcd92d	02a0a874-6d4e-4e56-8d74-7952c912fed2	LIVING	8.97	FD75D315-EED7-4350-A890-8FB94648E9FC	Alive	FEMALE		NA	NA	NA	No		Primary Tumor
TCGA-A8-A07S-01	TCGA-A8-A07S		6th	T2	M0	-26998		0.106	243	119	NA	73		7.98	DiseaseFree	Positive				2011-05-27	C50.9	YES	220	C50.4	8522/3	NO	0		Post (prior bilateral ovariectomy OR >12 mo since LMP with no prior hysterectomy)	NA	No	N0	Stage IIA		FALSE	a20fa2c4-a502-47e3-bfaa-2ec4cce3a859	0126489d-c12a-4651-8700-d7090732d7ab	LIVING	7.98	AC2E3DDC-3AF6-45F0-8269-E9DA68F4367A	Alive	FEMALE	WITH TUMOR	NA	NA	NA	No		Primary Tumor
TCGA-A8-A07U-01	TCGA-A8-A07U		6th	T2	M0	-24411		0.0901	303	210	NA	66		9.95	DiseaseFree	Negative				2011-05-27	C50.9	YES	100	C50.4	8500/3	NO	0		Post (prior bilateral ovariectomy OR >12 mo since LMP with no prior hysterectomy)	44	No	N2a	Stage IIIA		FALSE	59bf0ce4-715a-4017-bccb-c59916e78324	7bd968be-14ae-4a63-96d5-814d16072818	LIVING	9.95	1E7788D8-B5FC-473A-8A10-79910443799A	Alive	FEMALE	TUMOR FREE	NA	NA	NA	No		Primary Tumor
TCGA-A8-A07W-01	TCGA-A8-A07W		6th	T2	M1	-27942		0.479	304	180	NA	76		9.99	DiseaseFree	Positive				2011-05-25	C50.9	YES	180	C50.4	8500/3	NO	0		Post (prior bilateral ovariectomy OR >12 mo since LMP with no prior hysterectomy)	71	No	NX	Stage IV		FALSE	01263518-5f7c-49dc-8d7e-84b0c03a6a63	5d1a5545-6934-41e5-b41b-8e0ee88e6ec6	LIVING	9.99	C39563FD-CD7F-47C6-A257-5CB70A01C67C	Alive	FEMALE	WITH TUMOR	NA	NA	NA	No		Primary Tumor
TCGA-A8-A081-01	TCGA-A8-A081		6th	T2	M0	-29555		0.645	0	637	NA	80		0	DiseaseFree	Negative				2011-05-27	C50.9	YES	150	C50.1	8500/3	NO	0		Post (prior bilateral ovariectomy OR >12 mo since LMP with no prior hysterectomy)	76	No	N0	Stage IIA		FALSE	9d876f05-5080-4c4e-9bf5-45f631d381e5	050ec96b-f110-429e-a138-4a41b38a24ae	LIVING	0	DE25BF82-5F7A-489B-BFC1-9386C44E7D62	Alive	FEMALE	TUMOR FREE	NA	NA	NA	No		Primary Tumor
TCGA-A8-A082-01	TCGA-A8-A082		6th	T2	M0	-21338		0.123	549	606	NA	58		18	DiseaseFree	Negative				2011-05-27	C50.9	YES	130	C50.1	8500/3	NO	0		Post (prior bilateral ovariectomy OR >12 mo since LMP with no prior hysterectomy)	21	No	N1a	Stage IIB		FALSE	5e4187c9-98f8-4bdb-a8da-6a914e96f47a	24eaa7eb-502d-4c9a-b390-507b51c53f96	LIVING	18	3E967C4F-B916-4A80-A9A1-A5E94F02322C	Alive	FEMALE	TUMOR FREE	NA	NA	NA	No		Primary Tumor
TCGA-A8-A083-01	TCGA-A8-A083		6th	T3	M0	-24746		0.182	0	575	NA	67		0	DiseaseFree	Negative				2011-05-27	C50.9	YES	300	C50.1	8500/3	NO	0		Post (prior bilateral ovariectomy OR >12 mo since LMP with no prior hysterectomy)	31	No	N0	Stage IIB		FALSE	afb9418e-91eb-4db1-aacf-12bd946c9ba0	90b93fd6-b94d-4a98-ad7d-dba3428cbb25	LIVING	0	AF0A2220-DEEC-44C8-B15C-B6442D5B7517	Alive	FEMALE	TUMOR FREE	NA	NA	NA	No		Primary Tumor
TCGA-A8-A084-01	TCGA-A8-A084		5th	T2	M0	-29858		0.424	458	1033	NA	81		15.1	DiseaseFree	Positive				2011-05-27	C50.9	YES	270	C50.1	8500/3	NO	0		Post (prior bilateral ovariectomy OR >12 mo since LMP with no prior hysterectomy)	62	Yes	N1a	Stage IIB		FALSE	3dbe99d1-e3b8-4ee2-b6a8-2e2e12c6fbe9	3b3eab6c-c039-4c2b-ae4c-18b043d3d810	LIVING	15.1	6A49B3F9-6B43-4D74-A28B-C83BFE61EC7B	Alive	FEMALE	WITH TUMOR	NA	NA	NA	Yes		Primary Tumor
TCGA-A8-A085-01	TCGA-A8-A085		6th	T2	M0	-16377		0.24	1124	788	NA	44		36.9	DiseaseFree	Negative				2011-05-27	C50.9	YES	130	C50.1	8500/3	NO	0			59	No	N1a	Stage IIB		FALSE	3c08aabd-d5b5-4bbe-857c-38a7527b2163	0dba8c12-0f21-4489-8639-47c156ddfa5f	LIVING	36.9	64F84FF4-A477-4E1E-B4BB-E5614517229E	Alive	MALE	TUMOR FREE	NA	NA	NA	No		Primary Tumor
TCGA-A8-A086-01	TCGA-A8-A086		6th	T1c	M0	-21731		0.276	396	272	NA	59		13	DiseaseFree	Negative				2011-05-27	C50.9	YES	150	C50.1	8500/3	NO	0		Post (prior bilateral ovariectomy OR >12 mo since LMP with no prior hysterectomy)	17	No	N1a	Stage IIA		FALSE	f9eb88f7-9293-46bf-ace4-a746e4ff80dc	0b2e3720-4a7e-44cd-9e38-7d883f559c1c	LIVING	13	D4E86E20-B75E-4CDA-83F2-22C481D4B9E8	Alive	FEMALE	TUMOR FREE	NA	NA	NA	No		Primary Tumor
TCGA-A8-A08B-01	TCGA-A8-A08B		6th	T2	M0	-19114		0.4	702	759	NA	52		23.1	DiseaseFree	Negative				2011-05-27	C50.9	YES	100	C50.2	8500/3	NO	0		Pre (<6 months since LMP AND no prior bilateral ovariectomy AND not on estrogen replacement)	25	No	N0	Stage IIA		FALSE	d8d7a6c2-6427-4f47-968c-6c3affba4617	1964addf-c524-4c72-b596-009235bad133	LIVING	23.1	2261B407-340D-4BB3-94BC-F06096FBDA80	Alive	FEMALE	TUMOR FREE	NA	NA	NA	No		Primary Tumor
TCGA-A8-A08C-01	TCGA-A8-A08C		6th	T2	M0	-24017		0.65	608	484	NA	65		20	DiseaseFree	Negative				2011-05-27	C50.9	YES	110	C50.4	8500/3	NO	0		Post (prior bilateral ovariectomy OR >12 mo since LMP with no prior hysterectomy)	NA	No	N0	Stage IIA		FALSE	78e1da41-127c-4e9c-aaaa-77a0d94c31d0	b1de1587-febd-4e50-99ac-eb3dcb23033a	LIVING	20	6E136F3D-A6E1-4541-AA4B-65BC5872DE06	Alive	FEMALE	TUMOR FREE	NA	NA	NA	No		Primary Tumor
TCGA-A8-A08F-01	TCGA-A8-A08F		6th	T2	M0	-21641		0.661	549	637	NA	59		18	DiseaseFree	Negative				2011-05-27	C50.9	YES	100	C50.2	8500/3	NO	0		Post (prior bilateral ovariectomy OR >12 mo since LMP with no prior hysterectomy)	102	Yes	N3a	Stage IIIC		FALSE	0a017f15-1c6b-45e7-8d55-e0a71df1b2e8	f4f60d69-6c0d-4a73-90fa-ee369de95fdd	LIVING	18	683AAF99-3B91-4501-B701-C3A4E8439647	Alive	FEMALE	TUMOR FREE	NA	NA	NA	Yes		Primary Tumor
TCGA-A8-A08G-01	TCGA-A8-A08G		6th	T2	M0	-14976		0.534	607	422	NA	41		19.9	DiseaseFree	Negative				2011-05-27	C50.9	YES	180	C50.9	8500/3	NO	0		Pre (<6 months since LMP AND no prior bilateral ovariectomy AND not on estrogen replacement)	35	No	N0	Stage IIA		FALSE	719082cc-1ebe-4a51-a659-85a59db1d77d	ea93b70f-c0b6-4063-86a8-cac7d5d99c77	LIVING	19.9	6DCA5C2C-F28A-409D-9623-24AB748FB4E7	Alive	FEMALE	TUMOR FREE	NA	NA	NA	No		Primary Tumor
TCGA-A8-A08H-01	TCGA-A8-A08H		6th	T2	M0	-24137		2.192e-05	0	1184	NA	66		0	DiseaseFree	Negative				2011-05-27	C50.9	YES	250	C50.2	8500/3	NO	0		Post (prior bilateral ovariectomy OR >12 mo since LMP with no prior hysterectomy)	54	No	N0	Stage IIA		FALSE	db8d38ab-cc61-49ee-863d-40060112f2af	298e1da3-0691-4675-931e-4a36f2ca858d	LIVING	0	33188769-D86E-41AD-A74D-31A7C2DD08B7	Alive	FEMALE	TUMOR FREE	NA	NA	NA	No		Primary Tumor
TCGA-A8-A08I-01	TCGA-A8-A08I		6th	T2	M0	-19389		0.637	365	241	NA	53		12	DiseaseFree	Negative				2011-05-27	C50.9	YES	80	C50.2	8500/3	NO	0		Post (prior bilateral ovariectomy OR >12 mo since LMP with no prior hysterectomy)	34	No	N0	Stage IIA		FALSE	7acf33e7-c386-45fd-8c9a-469600378687	6d462341-cb4a-47bf-8c1b-2ffd6cf5e9ed	LIVING	12	F2077079-D683-4D18-94B9-84C760674AF6	Alive	FEMALE	TUMOR FREE	NA	NA	NA	No		Primary Tumor
TCGA-A8-A08J-01	TCGA-A8-A08J		6th	T4b	M1	-19266		0.449	NA	1733	1127	52		NA		Positive				2011-05-27	C50.9	YES	630	C50.9	8541/3	NO	0		Post (prior bilateral ovariectomy OR >12 mo since LMP with no prior hysterectomy)	35	No	N3	Stage IV		FALSE	68177e92-4784-45d9-af14-4ce0c00eae74	4c54a99b-a820-4602-9b39-deaca98034a5	DECEASED	37	C1D59BA7-FC3E-46EA-B095-3B6DF42892B0	Dead	FEMALE	WITH TUMOR	NA	NA	NA	No		Primary Tumor
TCGA-A8-A08L-01	TCGA-A8-A08L		6th	T3	M0	-32842		0.538	NA	698	304	89		NA		Negative				2011-05-27	C50.9	YES	200	C50.9	8500/3	NO	0		Post (prior bilateral ovariectomy OR >12 mo since LMP with no prior hysterectomy)	181	No	N2a	Stage IIIA		FALSE	8bd68696-5eeb-46d7-9dc6-c39c849029a4	c385c7fc-0e3e-4fc8-87c1-6db442e5606f	DECEASED	9.99	BC0E0F93-B183-44E8-B551-EA463B2FBCE4	Dead	FEMALE	TUMOR FREE	NA	NA	NA	No		Primary Tumor
TCGA-A8-A08O-01	TCGA-A8-A08O		6th	T2	M1	-16681		0.643	943	819	NA	45		31	DiseaseFree	Positive				2011-05-27	C50.9	YES	130	C50.9	8500/3	NO	0		Pre (<6 months since LMP AND no prior bilateral ovariectomy AND not on estrogen replacement)	21	No	N3a	Stage IV		FALSE	5f5964a8-8e07-4620-98f0-93d162dbc31e	6c05cfbf-4858-45d1-b5b8-d943a542d196	LIVING	31	2F102533-4B6B-4411-9080-3697ED3099EA	Alive	FEMALE	WITH TUMOR	NA	NA	NA	No		Primary Tumor
TCGA-A8-A08P-01	TCGA-A8-A08P		6th	T2	M0	-25598		0.543	943	819	NA	70		31	DiseaseFree	Negative				2011-05-27	C50.9	YES	210	C50.9	8500/3	NO	0		Post (prior bilateral ovariectomy OR >12 mo since LMP with no prior hysterectomy)	40	No	N2a	Stage IIIA		FALSE	f947d67f-4aa2-4eb9-977e-21a5ae563613	3de1ba17-00fc-462f-92a4-096e8112fd89	LIVING	31	7DB1F816-A55F-449A-8DF9-6724B5100CA1	Alive	FEMALE	TUMOR FREE	NA	NA	NA	No		Primary Tumor
TCGA-A8-A08R-01	TCGA-A8-A08R		6th	T2	M0	-19298		0.515	30	728	NA	52		0.99	DiseaseFree	Negative				2011-05-27	C50.9	YES	90	C50.9	8500/3	NO	0		Post (prior bilateral ovariectomy OR >12 mo since LMP with no prior hysterectomy)	141	No	N1a	Stage IIB		FALSE	6412854a-f874-469e-9d1f-8bd3ae5bd41d	0dd8e6c7-9b41-4489-924f-bddf7d189eb3	LIVING	0.99	FC0C1BF3-74C3-4DFC-B9B5-2FD1728E287A	Alive	FEMALE	TUMOR FREE	NA	NA	NA	No		Primary Tumor
TCGA-A8-A08S-01	TCGA-A8-A08S		6th	T1c	M0	-25994		0.402	580	637	NA	71		19.1	DiseaseFree	Negative				2011-05-27	C50.9	YES	80	C50.9	8500/3	NO	0		Post (prior bilateral ovariectomy OR >12 mo since LMP with no prior hysterectomy)	47	Yes	N1	Stage IIA		FALSE	2779fa01-ac93-4e80-a997-3385f72172c3	960d194f-fe39-42a0-831d-5c031cf93544	LIVING	19.1	0D293DF8-374D-4681-9B2A-ACC98601AA25	Alive	FEMALE	TUMOR FREE	NA	NA	NA	Yes		Primary Tumor
TCGA-A8-A08T-01	TCGA-A8-A08T		6th	T2	M1	-23560		0.211	2830	2767	NA	64		93	DiseaseFree	Positive				2011-05-27	C50.9	YES	190	C50.9	8500/3	NO	0		Post (prior bilateral ovariectomy OR >12 mo since LMP with no prior hysterectomy)	41	No	N1a	Stage IV		FALSE	32bc7cc4-d185-4594-bbee-4b96410be512	4ab5f84d-7ba2-49e2-862b-48ff8cff3c34	LIVING	93	5780D50C-5BF0-4392-BC9B-894D1369866A	Alive	FEMALE	WITH TUMOR	NA	NA	NA	No		Primary Tumor
TCGA-A8-A08X-01	TCGA-A8-A08X		6th	T4d	M0	-15705		0.345	1034	941	NA	43		34	DiseaseFree	Negative				2011-05-27	C50.9	YES	170	C50.9	8500/3	NO	0		Pre (<6 months since LMP AND no prior bilateral ovariectomy AND not on estrogen replacement)	18	No	N3a	Stage IIIC		FALSE	f5539207-6534-4edc-a5a5-7666b5d16ba4	32b46b33-43d1-4663-bebd-f31673f18a16	LIVING	34	CA911D90-5DDA-49F1-993F-68FCA77A8558	Alive	FEMALE	TUMOR FREE	NA	NA	NA	No		Primary Tumor
TCGA-A8-A08Z-01	TCGA-A8-A08Z		6th	T4b	M0	-28003		0.105	1217	2036	NA	76		40	DiseaseFree	Negative				2011-05-27	C50.9	YES	350	C50.9	8500/3	NO	0		Post (prior bilateral ovariectomy OR >12 mo since LMP with no prior hysterectomy)	27	No	N3a	Stage IIIB		FALSE	d7808cbc-4b8c-467b-b2c3-f48d05b9ecab	5af3de3e-4376-41ab-ae28-4ea9a95dce2d	LIVING	40	DA7BD84B-C00E-40A0-9AE2-33FCE7995696	Alive	FEMALE	TUMOR FREE	NA	NA	NA	No		Primary Tumor
TCGA-A8-A090-01	TCGA-A8-A090		6th	T2	M0	-27121		0.286	0	667	NA	74		0	DiseaseFree	Negative				2011-05-27	C50.9	YES	110	C50.9	8500/3	NO	0		Post (prior bilateral ovariectomy OR >12 mo since LMP with no prior hysterectomy)	31	No	N0	Stage IIA		FALSE	f4b69043-4a67-48e3-a4d1-72a21ae2d175	5ebda262-2b64-4495-afec-38d3fa616d9a	LIVING	0	549E825B-F206-4FF9-835B-2FBE51C7B831	Alive	FEMALE	TUMOR FREE	NA	NA	NA	No		Primary Tumor
TCGA-A8-A091-01	TCGA-A8-A091		6th	T2	M0	-22554		0.307	580	637	NA	61		19.1	DiseaseFree	Negative				2011-05-27	C50.9	YES	180	C50.9	8500/3	NO	0		Post (prior bilateral ovariectomy OR >12 mo since LMP with no prior hysterectomy)	24	No	N0	Stage IIA		FALSE	f39edd06-1016-4e8e-a42e-12f7e699ddc5	f26df76e-66bc-4e25-8a27-41b6147dc67b	LIVING	19.1	FECA34F6-CEF7-4A6D-AA7E-F88542EAF6F7	Alive	FEMALE	TUMOR FREE	NA	NA	NA	Yes		Primary Tumor
TCGA-A8-A092-01	TCGA-A8-A092		6th	T2	M0	-17807		0.573	487	575	NA	48		16	DiseaseFree	Negative				2011-05-27	C50.9	YES	100	C50.9	8500/3	NO	0		Pre (<6 months since LMP AND no prior bilateral ovariectomy AND not on estrogen replacement)	71	No	N2a	Stage IIIA		FALSE	38a8b734-9acc-42f9-b5b7-e51b0dfc6504	8b5c7e4d-a220-4499-9e38-7deacc1776a2	LIVING	16	93D66EAD-B7D3-4688-8EC9-75C4380619D9	Alive	FEMALE	TUMOR FREE	NA	NA	NA	No		Primary Tumor
TCGA-A8-A093-01	TCGA-A8-A093		6th	T2	M0	-22373		0.422	546	422	NA	61		17.9	DiseaseFree	Negative				2011-05-27	C50.9	YES	100	C50.9	8500/3	NO	0		Post (prior bilateral ovariectomy OR >12 mo since LMP with no prior hysterectomy)	82	No	N0	Stage IIA		FALSE	02f5ae33-a563-4ecb-9e33-dfa500a44931	7b2cc917-cd91-486b-bb9b-4c57cf4e86e0	LIVING	17.9	9DCF000D-D996-49A6-950A-0CD1E90CC6C7	Alive	FEMALE	TUMOR FREE	NA	NA	NA	Yes		Primary Tumor
TCGA-A8-A094-01	TCGA-A8-A094		6th	T2	M0	-27729		0.487	0	363	NA	75		0	DiseaseFree	Negative				2011-05-27	C50.9	YES	400	C50.9	8500/3	NO	0		Post (prior bilateral ovariectomy OR >12 mo since LMP with no prior hysterectomy)	159	No	N0	Stage IIA		FALSE	993103b1-e5a1-4c33-8629-be53ebc41d64	a36231aa-f304-4bbf-aa86-b9547916c097	LIVING	0	85288EC6-0BDC-4955-8B88-1DEECBF0E235	Alive	FEMALE	TUMOR FREE	NA	NA	NA	No		Primary Tumor
TCGA-A8-A095-01	TCGA-A8-A095		6th	T1c	M0	-16742		0.0741	1277	1153	NA	45		42	DiseaseFree	Negative				2011-05-27	C50.9	YES	160	C50.9	8500/3	NO	0		Pre (<6 months since LMP AND no prior bilateral ovariectomy AND not on estrogen replacement)	103	No	N0	Stage I		FALSE	29df128d-ace2-40cf-88ee-3f6f2170f159	2223917e-5ff9-4726-99be-c73b19522265	LIVING	42	41A41A7F-E4DD-4D3A-B97D-B4657CA211E1	Alive	FEMALE	TUMOR FREE	NA	NA	NA	No		Primary Tumor
TCGA-A8-A096-01	TCGA-A8-A096		6th	T2	M0	-26723		0.0683	0	394	NA	73		0	DiseaseFree	Negative				2011-05-27	C50.9	YES	110	C50.9	8500/3	NO	0		Post (prior bilateral ovariectomy OR >12 mo since LMP with no prior hysterectomy)	29	No	N0	Stage IIA		FALSE	d7cac141-9269-4733-83ce-e1bc0b503254	cc620a1f-7955-43f8-aa30-12e244f89f1b	LIVING	0	91BFC77A-E56F-49F0-A294-A5EE9F266FB6	Alive	FEMALE	TUMOR FREE	NA	NA	NA	No		Primary Tumor
TCGA-A8-A097-01	TCGA-A8-A097		6th	T2	M0	-23741		0.387	365	241	NA	65		12	DiseaseFree	Negative				2011-05-27	C50.9	YES	100	C50.9	8500/3	NO	0		Post (prior bilateral ovariectomy OR >12 mo since LMP with no prior hysterectomy)	107	No	N1	Stage IIB		FALSE	dcfd0b1d-5707-44a6-b225-5e8f7cea5ca1	8deb20df-b01a-40d8-a398-5dbb14786792	LIVING	12	5B867CB6-F94D-435D-83E3-0ADB814B8077	Alive	FEMALE	TUMOR FREE	NA	NA	NA	No		Primary Tumor
TCGA-A8-A099-01	TCGA-A8-A099		6th	T4b	MX	-28063		0.192	304	180	NA	76		9.99	DiseaseFree					2011-05-27	C50.9	YES	210	C50.9	8500/3	NO	0		Post (prior bilateral ovariectomy OR >12 mo since LMP with no prior hysterectomy)	24	No	N3a	Stage X		FALSE	e98b69bc-766a-485f-b5e8-9166b8d457b3	582b2af4-08e5-44d8-996d-d00db1e98413	LIVING	9.99	34499A83-DFCE-4DB8-BAA0-A7590AF8BC07	Alive	FEMALE		NA	NA	NA	No		Primary Tumor
TCGA-A8-A09A-01	TCGA-A8-A09A		6th	T2	M0	-14883		0.426	304	180	NA	40		9.99	DiseaseFree	Positive				2011-05-27	C50.9	YES	170	C50.9	8500/3	NO	0		Pre (<6 months since LMP AND no prior bilateral ovariectomy AND not on estrogen replacement)	102	No	NX	Stage X		FALSE	b205bba0-1870-4458-9088-8817e20389fe	035ceab2-5468-41d5-9adf-f669225be543	LIVING	9.99	5A6E0F10-758E-4DC1-A5C7-57D5DF9B25EF	Alive	FEMALE	WITH TUMOR	NA	NA	NA	No		Primary Tumor
TCGA-A8-A09B-01	TCGA-A8-A09B		6th	T4b	M0	-21520		0.51	365	210	NA	58		12	DiseaseFree	Negative				2011-05-27	C50.9	YES	170	C50.9	8500/3	NO	0		Post (prior bilateral ovariectomy OR >12 mo since LMP with no prior hysterectomy)	33	No	N1a	Stage IIIB		FALSE	3828b534-908e-4953-a3fb-07d01cf49c7d	250c0ab4-ef0f-4340-a86d-628b98f8acca	LIVING	12	5D439E4F-F1B7-41F7-BF1D-1F6E93D6427D	Alive	FEMALE	TUMOR FREE	NA	NA	NA	No		Primary Tumor
TCGA-A8-A09C-01	TCGA-A8-A09C		6th	T2	MX	-25355		0.498	31	180	NA	69		1.02	DiseaseFree					2011-05-27	C50.9	YES	120	C50.9	8500/3	NO	0		Post (prior bilateral ovariectomy OR >12 mo since LMP with no prior hysterectomy)	20	No	N0	Stage X		FALSE	80f3f48a-cc21-415c-b181-c77e7ba1c563	0856c285-b57f-47ac-be8b-865dc2ddb58f	LIVING	1.02	1E002C47-CEC6-491C-9E67-B289687D5B66	Alive	FEMALE		NA	NA	NA	Yes		Primary Tumor
TCGA-A8-A09D-01	TCGA-A8-A09D		5th	T2	M0	-17440		0.234	396	1033	NA	47		13	DiseaseFree	Negative				2011-05-27	C50.9	YES	100	C50.5	8500/3	NO	0		Post (prior bilateral ovariectomy OR >12 mo since LMP with no prior hysterectomy)	31	No	N1	Stage IIB		FALSE	36449392-de76-4ee9-bc09-627a07e18727	ac9318f5-9e1f-4340-8da6-3815fff8bff5	LIVING	13	C4A1A482-6AE5-4807-BA05-C73AC0898546	Alive	FEMALE	TUMOR FREE	NA	NA	NA	No		Primary Tumor
TCGA-A8-A09G-01	TCGA-A8-A09G		6th	T3	M0	-29006		0.221	0	759	NA	79		0	DiseaseFree	Negative				2011-05-27	C50.9	YES	270	C50.5	8500/3	NO	0		Post (prior bilateral ovariectomy OR >12 mo since LMP with no prior hysterectomy)	209	No	N3a	Stage IIIC		FALSE	3927f736-3b5c-48c8-9d9e-83669ec44770	084b2d8f-96a8-41f1-844d-20004cd665e7	LIVING	0	2728DB14-66D5-4E67-B9B6-63D93DBF509C	Alive	FEMALE	TUMOR FREE	NA	NA	NA	No		Primary Tumor
TCGA-A8-A09I-01	TCGA-A8-A09I		6th	T2	M0	-30711		0.357	1006	698	NA	84		33	DiseaseFree	Negative				2011-05-27	C50.9	YES	430	C50.9	8500/3	NO	0		Post (prior bilateral ovariectomy OR >12 mo since LMP with no prior hysterectomy)	112	No	N0	Stage IIA		FALSE	1557183c-aedd-4df6-b98a-3654667f7b69	a09a99f9-33e3-45d5-bfc2-f57ce149a527	LIVING	33	AF12859A-D67A-488D-8BC2-ED28698F2ACA	Alive	FEMALE	TUMOR FREE	NA	NA	NA	Yes		Primary Tumor
TCGA-A8-A09K-01	TCGA-A8-A09K		6th	T1c	M0	-24960		0.503	912	788	NA	68		30	DiseaseFree	Negative				2011-05-27	C50.9	YES	240	C50.5	8500/3	NO	0		Post (prior bilateral ovariectomy OR >12 mo since LMP with no prior hysterectomy)	37	Yes	N1	Stage IIA		FALSE	6f959c92-b79f-4f84-9ee5-d07d3212d52d	6871927f-1488-4366-8545-439557a377aa	LIVING	30	56C24ABB-CF1D-447F-A5A8-B762C4B01566	Alive	FEMALE	TUMOR FREE	NA	NA	NA	Yes		Primary Tumor
TCGA-A8-A09M-01	TCGA-A8-A09M		6th	T2	M0	-27455		0.457	457	333	NA	75		15	DiseaseFree	Negative				2011-05-27	C50.9	YES	170	C50.5	8500/3	NO	0		Post (prior bilateral ovariectomy OR >12 mo since LMP with no prior hysterectomy)	90	No	N3a	Stage IIIC		FALSE	626b4ff0-2188-4a14-aac8-6703c624917f	6d1ce13f-530e-433f-b2a3-f30793b0b003	LIVING	15	EBBF2A70-2773-40FA-823A-E608ABFEF591	Alive	FEMALE	TUMOR FREE	NA	NA	NA	No		Primary Tumor
TCGA-A8-A09N-01	TCGA-A8-A09N		6th	T2	M0	-21002		0.698	31	1276	NA	57		1.02	DiseaseFree	Negative				2011-05-27	C50.9	YES	70	C50.5	8500/3	NO	0		Post (prior bilateral ovariectomy OR >12 mo since LMP with no prior hysterectomy)	56	No	N3a	Stage IIIC		FALSE	33919e92-4ea9-47e5-a6f4-36e51845d50f	03115606-c46f-40ef-a95f-cdc1c174797d	LIVING	1.02	F5A97F05-4B5C-4B10-BF10-5DDE7D412BCF	Alive	FEMALE	TUMOR FREE	NA	NA	NA	No		Primary Tumor
TCGA-A8-A09Q-01	TCGA-A8-A09Q		6th	T4b	M0	-30528		0.596	761	637	NA	83		25	DiseaseFree	Positive				2011-05-27	C50.9	YES	100	C50.3	8500/3	NO	0		Post (prior bilateral ovariectomy OR >12 mo since LMP with no prior hysterectomy)	87	No	N2a	Stage IIIB		FALSE	09c2bc35-c21f-4aa4-ac30-0d8db02ad811	6f8b48ba-ef24-4d33-a0c3-bc900a6c8cd2	LIVING	25	46C0AB7B-82FC-4D06-9F26-22AEC8BEEDA7	Alive	FEMALE	WITH TUMOR	NA	NA	NA	No		Primary Tumor
TCGA-A8-A09R-01	TCGA-A8-A09R		6th	T2	M0	-30196		0.475	273	149	NA	82		8.97	DiseaseFree	Negative				2011-05-27	C50.9	YES	180	C50.3	8500/3	NO	0		Post (prior bilateral ovariectomy OR >12 mo since LMP with no prior hysterectomy)	52	No	N1	Stage IIB		FALSE	cb0a2055-2168-4454-8755-47dd613db36f	3ed5e5ce-12c3-4d15-9414-0b76f874e43c	LIVING	8.97	5E615F92-6FD0-48C7-AC37-78526974BCFC	Alive	FEMALE	TUMOR FREE	NA	NA	NA	No		Primary Tumor
TCGA-A8-A09T-01	TCGA-A8-A09T		6th	T1c	MX	-25110		0.093	579	394	NA	68		19	DiseaseFree	Negative				2011-05-27	C50.9	YES	100	C50.9	8520/3	NO	0		Post (prior bilateral ovariectomy OR >12 mo since LMP with no prior hysterectomy)	23	No	N0	Stage X		FALSE	0adf59c6-581a-475d-a2f4-40aa40060b5b	8df411bb-1d82-4470-84ff-e2d335698d42	LIVING	19	C616E97C-8352-4FED-9E83-558318216FB6	Alive	FEMALE	TUMOR FREE	NA	NA	NA	No		Primary Tumor
TCGA-A8-A09V-01	TCGA-A8-A09V		6th	T2	M0	-18628		0.0703	457	333	NA	51		15	DiseaseFree	Negative				2011-05-27	C50.9	YES	60	C50.2	8520/3	NO	0		Pre (<6 months since LMP AND no prior bilateral ovariectomy AND not on estrogen replacement)	22	No	N0	Stage IIA		FALSE	cc348a26-ee11-47a4-8b51-de922967e175	c6d8d136-3bd3-49d2-8305-3377240a1ce7	LIVING	15	E0B04FB6-9500-4786-B6D9-303165EF9090	Alive	FEMALE	TUMOR FREE	NA	NA	NA	No		Primary Tumor
TCGA-A8-A09W-01	TCGA-A8-A09W		5th	T2	M0	-25659		0.382	30	1033	NA	70		0.99	DiseaseFree					2011-05-27	C50.9	YES	180	C50.2	8520/3	NO	0		Post (prior bilateral ovariectomy OR >12 mo since LMP with no prior hysterectomy)	73	No	N3	Stage IIIB		FALSE	452672e8-b6d9-45b5-bb02-e88e03e2dd66	af859133-ccf5-4157-a260-738c9583c17b	LIVING	0.99	B73AF7B0-EED3-413C-B249-C97F27E4EA1C	Alive	FEMALE		NA	NA	NA	No		Primary Tumor
TCGA-A8-A09X-01	TCGA-A8-A09X		6th	T2	M0	-22858		0.179	NA	302	426	62		NA						2011-05-27	C50.9	YES	150	C50.2	8520/3	NO	0		Post (prior bilateral ovariectomy OR >12 mo since LMP with no prior hysterectomy)	50	No	N3a	Stage IIIC		FALSE	27b05b15-a44b-45ed-a6e3-e7d1ca488ea9	5a9087b1-d001-4fcc-b061-f59e7026e711	DECEASED	14	F72703A2-2C57-459A-9015-94BD3D302491	Dead	FEMALE		NA	NA	NA	No		Primary Tumor
TCGA-A8-A09Z-01	TCGA-A8-A09Z		6th	T3	M0	-30590		0.12	0	728	NA	83		0	DiseaseFree	Positive				2011-05-27	C50.9	YES	320	C50.9	8520/3	NO	0		Post (prior bilateral ovariectomy OR >12 mo since LMP with no prior hysterectomy)	1071	No	N0	Stage IIB		FALSE	81e7a3d3-be70-4834-8018-4d2cc077a4e6	600a6f89-e714-4258-b4e7-33240123bfc6	LIVING	0	DF890966-D14E-4EDF-B6E3-E10E40BA5B5D	Alive	FEMALE	WITH TUMOR	NA	NA	NA	No		Primary Tumor
TCGA-A8-A0A1-01	TCGA-A8-A0A1		6th	T2	M0	-30742		0.117	365	241	NA	84		12	DiseaseFree	Negative				2011-05-27	C50.9	YES	90	C50.9	8520/3	NO	0		Post (prior bilateral ovariectomy OR >12 mo since LMP with no prior hysterectomy)	35	No	N0	Stage IIA		FALSE	3efa245d-177d-4ef9-94f7-f554c54e345e	7d53f59e-5ae6-4325-9054-c9b1eac7983d	LIVING	12	3BC6CE69-2641-4B6D-85DF-E8FE838015D0	Alive	FEMALE	TUMOR FREE	NA	NA	NA	No		Primary Tumor
TCGA-A8-A0A2-01	TCGA-A8-A0A2		6th	T2	M0	-24380		0.332	579	394	NA	66		19	DiseaseFree	Negative				2011-05-27	C50.9	YES	70	C50.5	8520/3	NO	0		Post (prior bilateral ovariectomy OR >12 mo since LMP with no prior hysterectomy)	23	No	N0	Stage IIA		FALSE	34d5a193-85e5-4399-8a9b-e92858eafdfe	9ae522c2-0fbf-493c-b3c7-a6ccd685c787	LIVING	19	6443B16E-E6D9-4A1D-B950-BEEC7BAEDBBE	Alive	FEMALE	TUMOR FREE	NA	NA	NA	No		Primary Tumor
TCGA-A8-A0A4-01	TCGA-A8-A0A4		6th	T2	M0	-26693		0.261	396	272	NA	73		13	DiseaseFree	Negative				2011-05-27	C50.9	YES	160	C50.1	8520/3	NO	0		Post (prior bilateral ovariectomy OR >12 mo since LMP with no prior hysterectomy)	25	No	N0	Stage IIA		FALSE	2cb8c866-9296-4c70-a3ea-f9a9b707895c	e315f3f0-664e-47fb-9f3a-c55b3eda826a	LIVING	13	25F8F043-2CD0-4344-9B4A-5BBB691B5BF9	Alive	FEMALE	TUMOR FREE	NA	NA	NA	No		Primary Tumor
TCGA-A8-A0A6-01	TCGA-A8-A0A6		6th	T2	M0	-23404		0.143	640	394	NA	64		21	DiseaseFree	Negative				2011-05-27	C50.9	YES	90	C50.4	8520/3	NO	0		Post (prior bilateral ovariectomy OR >12 mo since LMP with no prior hysterectomy)	2054	No	N3a	Stage IIIC		FALSE	4b0d295c-e185-4b52-9752-178e5bc1d47d	05415f21-4c6d-4cf4-924c-9c1eb769e696	LIVING	21	161A2735-C3CF-466D-AE21-C6A2C987BB1E	Alive	FEMALE	TUMOR FREE	NA	NA	NA	No		Primary Tumor
TCGA-A8-A0A7-01	TCGA-A8-A0A7		6th	T2	M0	-20940		0.0491	30	302	NA	57		0.99	DiseaseFree	Negative				2011-05-27	C50.9	YES	130	C50.4	8520/3	NO	0		Post (prior bilateral ovariectomy OR >12 mo since LMP with no prior hysterectomy)	119	No	N1a	Stage IIB		FALSE	995fdab7-7284-4d33-befa-ec22aa7c6479	ea748969-579b-43dd-b2cd-1b0ac46b64ea	LIVING	0.99	E306BE26-0358-4BE4-AEF6-AD42CC0DA020	Alive	FEMALE	TUMOR FREE	NA	NA	NA	No		Primary Tumor
TCGA-A8-A0A9-01	TCGA-A8-A0A9		6th	T2	M0	-29370		0.483	396	272	NA	80		13	DiseaseFree	Negative				2011-05-27	C50.9	YES	100	C50.4	8500/3	NO	0		Post (prior bilateral ovariectomy OR >12 mo since LMP with no prior hysterectomy)	44	No	N0	Stage IIA		FALSE	7b605fb6-d077-401e-b870-b87ddf505f82	35f3fabc-9939-43a2-8491-c3813a970d13	LIVING	13	8612388B-3680-4BD8-986C-E7ABE9F92F91	Alive	FEMALE	TUMOR FREE	NA	NA	NA	No		Primary Tumor
TCGA-A8-A0AB-01	TCGA-A8-A0AB		6th	T2	M0	-19814		0.295	518	394	NA	54		17	DiseaseFree	Negative				2011-05-27	C50.9	YES	70	C50.4	8520/3	NO	0		Post (prior bilateral ovariectomy OR >12 mo since LMP with no prior hysterectomy)	23	No	N0	Stage IIA		FALSE	22eaba28-be67-4730-9846-860bc1fca29a	860baf5b-abcf-4014-8b4b-d0a4b0d15c51	LIVING	17	E4D30B42-383A-40BF-BB91-511A90227655	Alive	FEMALE	TUMOR FREE	NA	NA	NA	No		Primary Tumor
TCGA-A8-A0AD-01	TCGA-A8-A0AD		6th	T1c	M0	-30407		0.163	1157	1033	NA	83		38	DiseaseFree	Negative				2011-05-27	C50.9	YES	90	C50.4	8522/3	NO	0		Post (prior bilateral ovariectomy OR >12 mo since LMP with no prior hysterectomy)	27	No	N0	Stage I		FALSE	af5453a9-cf1f-40de-aec4-0e0710908fb7	392933ed-ca0e-458d-b0b1-6ccfe71df1c3	LIVING	38	BD2AE048-BE93-4421-AD3E-BE6F9646484F	Alive	FEMALE	TUMOR FREE	NA	NA	NA	No		Primary Tumor
TCGA-AC-A23C-01	TCGA-AC-A23C		7th	T2	MX	-22751		0.168	29	198	NA	62		0.95	DiseaseFree	Negative		Core needle biopsy		2011-07-14	C50.9	YES	100	C50.9	8500/3	NO	0	YES	Post (prior bilateral ovariectomy OR >12 mo since LMP with no prior hysterectomy)	101	No	N1	Stage IIB		FALSE	dfd0b7ba-c7d3-498e-b455-346301865452	9cbd4bd6-244b-4274-a230-a7bd02e79571	LIVING	0.95	926E93B6-EF7C-4F13-824D-13D08B7F7938	Alive	FEMALE		NA	1	1	No	WHITE	Primary Tumor
TCGA-AC-A23E-01	TCGA-AC-A23E		7th	T2	MX	-18500		0.112	72	158	NA	50		2.37	DiseaseFree	Negative		Core needle biopsy		2011-07-18	C50.9	YES	130	C50.9	8500/3	NO	0	YES		15	No	N1	Stage IIB		FALSE	e7bae6e7-f779-449d-92b9-66996041e00d	d490330a-de38-478f-9504-a69260ab3967	LIVING	2.37	C976ACED-7FF8-4287-9D68-C6FD17895FC0	Alive	FEMALE	TUMOR FREE	NA	1	2	No	WHITE	Primary Tumor
TCGA-AC-A23G-01	TCGA-AC-A23G		6th	T1c	MX	-27934		0.0984	330	1590	NA	76		10.8	DiseaseFree	Negative		Core needle biopsy		2011-07-14	C50.9	YES	40	C50.9	8520/3	NO	0	YES	Post (prior bilateral ovariectomy OR >12 mo since LMP with no prior hysterectomy)	22	No	N1	Stage IIA		FALSE	A721DAC6-0126-476C-B2D4-2DBF7406454B	05BF18CD-2346-4EF9-B6DF-58AA8A67E8A5	LIVING	10.8	810663DD-1718-4FD6-B9C2-77B4C091B3F1	Alive	FEMALE	TUMOR FREE	NA	2	8	No	WHITE	Primary Tumor
TCGA-AC-A23H-01	TCGA-AC-A23H		7th	T2	M0	-32873		0.272	81	478	NA	90		NA		Negative	NOT HISPANIC OR LATINO	Core needle biopsy		2011-07-13	C50.9	YES	70	C50.9	8500/3	NO	0	NO	Post (prior bilateral ovariectomy OR >12 mo since LMP with no prior hysterectomy)	3845	No	NX	Stage IIA		FALSE	7dcf550c-90ce-4f63-aecd-0e46897e2a3e	d7e3b628-d5fd-4e79-9c4a-6409330fb8a7	DECEASED	5.72	A7C7D409-D086-4A9B-8C8F-E7E231D5891D	Dead	FEMALE	TUMOR FREE	NA	NA	NA	No	WHITE	Primary Tumor
TCGA-AC-A2B8-01	TCGA-AC-A2B8		7th	T3	M0	-31003		0.109	45	101	NA	84		1.48	DiseaseFree	Negative	NOT HISPANIC OR LATINO	Core needle biopsy		2011-09-12	C50.9	YES	150	C50.9	8520/3	NO	0	YES	Post (prior bilateral ovariectomy OR >12 mo since LMP with no prior hysterectomy)	86	No	N0 (i-)	Stage IIB		FALSE	6E126B73-D3E8-4641-A128-306F3B313E40	FABFEC99-220B-4A94-A8FE-01DFD71487F6	LIVING	1.48	3D878253-22B3-4A53-AE54-C0D95E085DB1	Alive	FEMALE		0	0	1	No	WHITE	Primary Tumor
TCGA-AC-A2BK-01	TCGA-AC-A2BK		6th	T2	MX	-28625		0.507	1172	1717	NA	78		38.5	DiseaseFree	Negative		Core needle biopsy		2011-09-16	C50.9	YES	140	C50.9	8500/3	NO	0	YES	Post (prior bilateral ovariectomy OR >12 mo since LMP with no prior hysterectomy)	74	No	N2a	Stage IIIA		FALSE	6FA2A667-9C36-4526-8A58-1975E863A806	B85BE663-EDBA-4E1E-A10C-D0297744A0E9	LIVING	38.5	3E54B0CE-8863-4728-BC95-A47C1869F52A	Alive	FEMALE	TUMOR FREE	NA	6	23	No	BLACK OR AFRICAN AMERICAN	Primary Tumor
TCGA-AC-A2BM-01	TCGA-AC-A2BM		6th	T2	MX	-15212		0.392	1162	2164	NA	41		38.2	DiseaseFree	Negative		Tumor resection		2011-09-12	C50.9	YES	120	C50.9	8500/3	NO	0	YES		20	No	N1a	Stage IIB		FALSE	8159FF7B-89F4-411A-9B9C-491F1CB3EB34	8D65B4EE-183B-4767-9091-DEC23A17AF93	LIVING	38.2	9F00B6F4-EE91-4A18-B533-127E39EF8554	Alive	FEMALE	TUMOR FREE	1	1	13	No	BLACK OR AFRICAN AMERICAN	Primary Tumor
TCGA-AC-A2FB-01	TCGA-AC-A2FB		6th	T2	MX	-23851		0.002379	44	576	NA	65		40.5	DiseaseFree	Negative	NOT HISPANIC OR LATINO	Core needle biopsy		2011-09-20	C50.9	YES	140	C50.9	8520/3	NO	0	YES		15	No	N0	Stage IIA		FALSE	02BBB632-0F7F-439D-B8F0-C86A06237424	7E2ED541-38EE-473F-AC5D-3CAE6F5D9A56	LIVING	40.5	F6CFE506-16BA-475A-A81F-1AC4B2EFE24A	Alive	FEMALE	TUMOR FREE	NA	0	1	No	WHITE	Primary Tumor
TCGA-AC-A2FF-01	TCGA-AC-A2FF		6th	T2	MX	NA		0.001147	1686	1904	NA	40		55.4	DiseaseFree	Negative	NOT HISPANIC OR LATINO	Core needle biopsy		2011-09-23	C50.9	YES	130	C50.9	8520/3	NO	0	YES		15	No	N1	Stage IIB		FALSE	3CA67CD0-81DA-4F68-A9FA-F1A8C013C28D	62D4D442-98A0-4540-B22A-4ACF1FBFC40B	LIVING	55.4	E6897E14-465A-486A-A6AD-FCFED21629F2	Alive	FEMALE	TUMOR FREE	0	3	7	No	ASIAN	Primary Tumor
TCGA-AC-A2FG-01	TCGA-AC-A2FG		6th	T2	MX	-29211		0.0788	1125	1517	NA	79		37	DiseaseFree	Negative		Core needle biopsy		2011-09-21	C50.9	YES	120	C50.9	8520/3	NO	0	YES	Post (prior bilateral ovariectomy OR >12 mo since LMP with no prior hysterectomy)	38	No	N1a	Stage IIB		FALSE	39CDA4C9-E1C8-44C2-BAB7-F5849C12F879	891365B0-3BB1-4F7C-B351-6191B18EE9D7	LIVING	37	C1ABCD83-40EA-4FF7-BEB6-69679589E8E7	Alive	FEMALE	TUMOR FREE	1	1	11	No	WHITE	Primary Tumor
TCGA-AC-A2FK-01	TCGA-AC-A2FK		6th	T2	M0	-16627		1.598e-05	1180	1833	NA	45		38.8	DiseaseFree	Negative	HISPANIC OR LATINO	Core needle biopsy		2011-09-13	C50.9	YES	80	C50.9	8520/3	NO	0	YES		0	No	N3a	Stage IIIC		FALSE	79126E88-9CF8-45FF-BF91-A98DA3B304D7	5D7A6563-6E74-48CB-A6A9-6D860759DDAC	LIVING	38.8	1CF3FA64-EAE6-4A18-9B51-F5980A885371	Alive	FEMALE	TUMOR FREE	NA	3	3	No		Primary Tumor
TCGA-AC-A2FM-01	TCGA-AC-A2FM		6th	T2	M0	-31805		0.484	NA	2606	792	87		NA		Negative	NOT HISPANIC OR LATINO	Core needle biopsy		2012-02-22	C50.9	YES	170	C50.9	8520/3	NO	0	YES	Post (prior bilateral ovariectomy OR >12 mo since LMP with no prior hysterectomy)	37	No	N1mi	Stage IIB		FALSE	B6B1DC9A-91F4-4B0A-AFD5-62C9A90C0D5E	8E391BEC-541C-49DC-A0A8-5ECE5F268F1F	DECEASED	26	83BA3E82-E8E4-4A70-ADEE-A1360940EECE	Dead	FEMALE	WITH TUMOR	0	0	2	No	WHITE	Primary Tumor
TCGA-AC-A2FO-01	TCGA-AC-A2FO		6th	T2	MX	-23928		0.118	1542	2051	NA	65		50.7	DiseaseFree	Negative	NOT HISPANIC OR LATINO	Core needle biopsy		2011-09-21	C50.9	YES	120	C50.9	8520/3	NO	0	YES	Post (prior bilateral ovariectomy OR >12 mo since LMP with no prior hysterectomy)	22	No	N1	Stage IIB		FALSE	F5D4C2D3-CC69-4B38-8551-0917E3622A68	6AB6C7D7-A0B5-4830-94A3-F16BC11EF953	LIVING	50.7	5A7EB73F-E681-46CC-B2D6-C87EEAB0AC99	Alive	FEMALE	TUMOR FREE	NA	2	10	No	WHITE	Primary Tumor
TCGA-AC-A2QH-01	TCGA-AC-A2QH		7th	T3	MX	-21488		0.409	31	108	NA	58		1.02	DiseaseFree	Negative	NOT HISPANIC OR LATINO	Core needle biopsy		2011-10-18	C50.9	YES	150	C50.9	8575/3	NO	0	YES	Post (prior bilateral ovariectomy OR >12 mo since LMP with no prior hysterectomy)	55	No	N0	Stage IIB		FALSE	67C5F371-3FA9-47C5-8B15-C2DD9ACC8519	FD735DC5-2EC3-43BD-B1B1-8FA811BE0633	LIVING	1.02	C2A0E948-2B9E-4E49-90C4-57CE4C4A95B3	Alive	FEMALE		0	0	22	No	WHITE	Primary Tumor
TCGA-AC-A2QI-01	TCGA-AC-A2QI		7th	T3	MX	-27865		0.0938	28	91	NA	76		0.92	DiseaseFree	Negative	NOT HISPANIC OR LATINO	Core needle biopsy		2011-10-18	C50.9	YES	140	C50.9	8520/3	NO	0	YES	Post (prior bilateral ovariectomy OR >12 mo since LMP with no prior hysterectomy)	59	No	N1a	Stage IIIA		FALSE	C57835BE-77AB-4CF5-9B23-62C11A7B2EAF	08F10BB1-6DD4-4F36-86A3-1801F9762187	LIVING	0.92	5CF85AF1-D227-430C-99CD-C2A524CFFA29	Alive	FEMALE		NA	2	2	No	WHITE	Primary Tumor
TCGA-AC-A2QJ-01	TCGA-AC-A2QJ		7th	T4b	M0	-17569		0.185	69	160	NA	48		2.27	DiseaseFree	Negative	HISPANIC OR LATINO	Core needle biopsy		2011-10-18	C50.9	YES	150	C50.9	8575/3	NO	0	YES	Peri (6-12 months since last menstrual period)	34	No	N0	Stage IIIB		FALSE	D9FD2724-7DB0-4AF3-AC14-217BDFA5203F	A3AFBB9F-F611-4BF7-A7F7-8DB59022F66F	LIVING	2.27	E422C6E8-084F-42B8-84E7-4EF387F098C7	Alive	FEMALE	TUMOR FREE	NA	0	2	No		Primary Tumor
TCGA-AC-A3BB-01	TCGA-AC-A3BB		7th	T3	MX	-16983		0.117	30	106	NA	46		0.99	DiseaseFree	Negative	NOT HISPANIC OR LATINO	Core needle biopsy		2012-02-03	C50.9	YES	160	C50.9	8520/3	NO	0	NO		69	No	N2a	Stage IIIA		FALSE	048549CF-D0A5-4743-A0A1-2004F7CC2B08	2FA19AF2-6FA0-4164-A0BB-8524D6085D80	LIVING	0.99	4D864947-076C-4A66-940D-682E75E525A2	Alive	FEMALE		NA	5	14	No	BLACK OR AFRICAN AMERICAN	Primary Tumor
TCGA-AC-A3HN-01	TCGA-AC-A3HN		7th	T2	MX	-32061		0.15	21	97	NA	87		0.69	DiseaseFree	Negative	NOT HISPANIC OR LATINO	Core needle biopsy		2012-04-13	C50.9	YES	160	C50.9	8520/3	NO	0	YES	Post (prior bilateral ovariectomy OR >12 mo since LMP with no prior hysterectomy)	15	No	N1a	Stage IIB		FALSE	E37AE674-A107-4EB3-94D8-B86B0035A9F7	96E71B7B-D32B-48BC-858D-20F7C8B7812D	LIVING	0.69	F0308FC8-D8B4-487F-A072-05E66D01842A	Alive	FEMALE	TUMOR FREE	0	2	3	No	WHITE	Primary Tumor
TCGA-AC-A3OD-01	TCGA-AC-A3OD		7th	T2	MX	-25186		0.267	35	63	NA	68		14.8	DiseaseFree	Negative	NOT HISPANIC OR LATINO	Core needle biopsy		2012-04-19	C50.9	YES	30	C50.9	8520/3	NO	0	YES	Post (prior bilateral ovariectomy OR >12 mo since LMP with no prior hysterectomy)	20	No	N1mi	Stage IIB		FALSE	F2622CDB-AC92-42B3-A1CA-67E133C3DD4A	42C7E92B-6820-4562-9E32-A424A99A6CBA	LIVING	14.8	9F7E2B98-29E7-465F-AE12-33D78FDFD71A	Alive	FEMALE	TUMOR FREE	NA	1	3	No	WHITE	Primary Tumor
TCGA-AC-A3QP-01	TCGA-AC-A3QP		7th	T2	MX	-29113		0.0716	286	184	NA	79		9.4	DiseaseFree	Negative	NOT HISPANIC OR LATINO	Core needle biopsy		2012-07-05	C50.9	YES	150	C50.9	8520/3	NO	0	YES	Post (prior bilateral ovariectomy OR >12 mo since LMP with no prior hysterectomy)	24	No	N1mi	Stage IIB		TRUE	6F4C8D30-47FB-47DF-9EB7-4E5881E3711E	A14E7E3D-0593-4D69-B17B-E79DFB065A0F	LIVING	9.4	14E2FC4E-7205-4929-81B5-7FF3006F08AD	Alive	FEMALE	TUMOR FREE	1	1	2	No	WHITE	Primary Tumor
TCGA-AC-A3TN-01	TCGA-AC-A3TN		7th	T3	MX	-27421		0.071	34	78	NA	75		1.12	DiseaseFree	Negative	NOT HISPANIC OR LATINO	Other method, specify:	[Unknown]	2012-08-01	C50.9	YES	140	C50.9	8520/3	NO	0	YES	Post (prior bilateral ovariectomy OR >12 mo since LMP with no prior hysterectomy)	75	No	N0	Stage IIB		FALSE	81B70C58-4A12-448C-A594-2ADE44F6A0AE	70E344F1-A29C-42C7-9FE8-DA9219D45158	LIVING	1.12	1A0D203A-BC4B-441F-97F6-D1FF7E959262	Alive	FEMALE	TUMOR FREE	NA	0	2	No	WHITE	Primary Tumor
TCGA-AC-A3W6-01	TCGA-AC-A3W6	[Unknown]	7th	T3	MX	-32872		0.105	51	101	NA	90	[Unknown]	1.68	DiseaseFree	Negative	NOT HISPANIC OR LATINO	Core needle biopsy		2012-09-24	C50.9	YES	140	C50.9	8520/3	NO	0	YES	Post (prior bilateral ovariectomy OR >12 mo since LMP with no prior hysterectomy)	169	No	N1	Stage IIIA	NO	FALSE	1B4CFAD1-E353-4411-97B6-2B7B9309E95E	314E66DF-0ADC-4B7F-98E0-A32929192C71	LIVING	1.68	B52E150F-5B34-482A-84E7-1739B9AC09B7	Alive	FEMALE	TUMOR FREE	3	3	3	Yes	WHITE	Primary Tumor
TCGA-AC-A3YI-01	TCGA-AC-A3YI	[Unknown]	7th	T1c	MX	-27143		0.0325	47	87	NA	74	[Unknown]	1.54	DiseaseFree	Negative	NOT HISPANIC OR LATINO	Core needle biopsy		2012-10-08	C50.9	YES	120	C50.9	8520/3	NO	0	YES	Post (prior bilateral ovariectomy OR >12 mo since LMP with no prior hysterectomy)	19	No	N3a	Stage IIIC	NO	FALSE	A45D296E-EFC0-479E-B2F6-BAD834668CDF	EA7490BF-06AC-43E0-BB61-A2756D027836	LIVING	1.54	52CEF542-0F5B-4660-8746-2CF4A27B214E	Alive	FEMALE	[Unknown]	NA	12	13	No	WHITE	Primary Tumor
TCGA-AC-A3YJ-01	TCGA-AC-A3YJ	[Unknown]	7th	T2	MX	-24439		0.0443	40	114	NA	66	[Unknown]	1.31	DiseaseFree	Negative	NOT HISPANIC OR LATINO	Core needle biopsy		2012-10-03	C50.9	YES	220	C50.9	8050/3	NO	0	YES	Post (prior bilateral ovariectomy OR >12 mo since LMP with no prior hysterectomy)	19	No	N0 (i-)	Stage IIA	NO	FALSE	86CF879E-3B40-44DD-AAA7-6F49F54A15D9	3447BDBF-5177-451E-BB93-736153EA76A9	LIVING	1.31	0F890724-8554-4B2B-B4EC-6B9B24C757D8	Alive	FEMALE	TUMOR FREE	0	0	1	No	WHITE	Primary Tumor
TCGA-AN-A03X-01	TCGA-AN-A03X			T2	M0	-27163		0.307	10	36	NA	74		0.33	DiseaseFree	Negative	NOT HISPANIC OR LATINO	Tumor resection		2010-12-28	C50.9	YES	170	C50.9	8500/3	NO	0		Post (prior bilateral ovariectomy OR >12 mo since LMP with no prior hysterectomy)	36	No	N0	Stage IIA		TRUE	88cd6ccc-70f7-436e-a99c-039b9d31e335	d9e29db0-558c-4bd5-aa94-15d5d57110b1	LIVING	0.33	1F6200B4-B53B-4E9F-B01B-12D2C0D4270E	Alive	FEMALE	TUMOR FREE	0	0	19	No	WHITE	Primary Tumor
TCGA-AN-A03Y-01	TCGA-AN-A03Y			T2	M0	-24232		0.377	10	36	NA	66		0.33	DiseaseFree	Negative	NOT HISPANIC OR LATINO	Tumor resection		2010-12-29	C50.9	YES	160	C50.9	8500/3	NO	0		Post (prior bilateral ovariectomy OR >12 mo since LMP with no prior hysterectomy)	23	No	N0	Stage IIA		TRUE	a991644b-3ee6-4cda-acf0-e37de48a49fc	95c533d3-798c-4aca-8f38-dc4825f254b5	LIVING	0.33	76734A82-9137-4DA4-871E-D4EC1BC33831	Alive	FEMALE	TUMOR FREE	0	0	9	No	WHITE	Primary Tumor
TCGA-AN-A041-01	TCGA-AN-A041		7th	T2	M0	-10812		0.326	7	33	NA	29		0.23	DiseaseFree	Negative	NOT HISPANIC OR LATINO	Tumor resection		2011-04-01	C50.9	YES	280	C50.9	8500/3	NO	0	YES	Pre (<6 months since LMP AND no prior bilateral ovariectomy AND not on estrogen replacement)	21	No	N1a	Stage IIB		TRUE	316e021c-5175-4ab3-bdb6-2bf9683f657a	b6fe1d5a-f1c0-470d-bf49-b5a13157d2c6	LIVING	0.23	26C566AF-C710-4856-AC21-83D73370EA84	Alive	FEMALE		NA	1	18	No	WHITE	Primary Tumor
TCGA-AN-A046-01	TCGA-AN-A046			T2	M0	-25158		0.0264	10	27	NA	68		0.33	DiseaseFree	Negative	NOT HISPANIC OR LATINO	Tumor resection		2010-12-28	C50.9	YES	150	C50.9	8500/3	NO	0		Post (prior bilateral ovariectomy OR >12 mo since LMP with no prior hysterectomy)	4915	No	N0	Stage IIA		TRUE	dcd5860c-7e3a-44f3-a732-fe92fe3fe300	57aff09f-0e97-4e65-a227-3dc7a8516367	LIVING	0.33	1304FB17-A20A-4EBC-9CC8-1554808AC1F6	Alive	FEMALE	TUMOR FREE	0	0	19	No	WHITE	Primary Tumor
TCGA-AN-A049-01	TCGA-AN-A049			T2	M0	-22710	Allred (Biocare)	0.38	19	769	NA	62		0.62	DiseaseFree	Positive	NOT HISPANIC OR LATINO	Tumor resection		2010-12-29	C50.9	YES	330	C50.9	8500/3	NO	0		Post (prior bilateral ovariectomy OR >12 mo since LMP with no prior hysterectomy)	32	No	N0	Stage IIA		TRUE	2e1e3bf0-1708-4b65-936c-48b89eb8966a	b09dcf83-93a7-466b-9414-12896ac7749c	LIVING	0.62	8C2B719A-D45A-4DF3-BA61-908A2E1F6D1D	Alive	FEMALE	TUMOR FREE	0	0	9	No	WHITE	Primary Tumor
TCGA-AN-A04A-01	TCGA-AN-A04A			T2	M0	-13445	Allred (Biocare)	0.537	90	743	NA	36		2.96	DiseaseFree	Positive	NOT HISPANIC OR LATINO	Tumor resection		2010-12-29	C50.9	YES	370	C50.9	8500/3	NO	0		Peri (6-12 months since last menstrual period)	26	No	N2	Stage IIIA		TRUE	e5aae05a-478e-4a55-a27c-12b2b4be302a	1d8f72b7-8596-40e8-afdf-244dd897758c	LIVING	2.96	6FB7A794-C3E7-4501-A844-CF65B9C3D32C	Alive	FEMALE	TUMOR FREE	0	4	7	No	WHITE	Primary Tumor
TCGA-AN-A04C-01	TCGA-AN-A04C			T2	M0	-18851	Allred (Biocare)	0.339	54	656	NA	51		1.77	DiseaseFree	Positive	NOT HISPANIC OR LATINO	Tumor resection		2010-12-29	C50.9	YES	190	C50.9	8500/3	NO	0		Post (prior bilateral ovariectomy OR >12 mo since LMP with no prior hysterectomy)	76	No	N1	Stage IIB		TRUE	66072c06-f251-4f0b-b6ae-12b407c52cc6	4a7e95e4-58b5-4e96-a029-98f294b3cd54	LIVING	1.77	045B2852-E1FF-4376-8F39-60FC940224D0	Alive	FEMALE	TUMOR FREE	0	2	15	No	WHITE	Primary Tumor
TCGA-AN-A04D-01	TCGA-AN-A04D			T2	M0	-21426	Allred (Biocare)	0.369	52	676	NA	58		1.71	DiseaseFree	Positive	NOT HISPANIC OR LATINO	Tumor resection		2010-12-20	C50.9	YES	260	C50.9	8500/3	NO	0		Post (prior bilateral ovariectomy OR >12 mo since LMP with no prior hysterectomy)	79	No	N1	Stage IIB		TRUE	49717f75-0f2d-4e1c-9a12-f1cd7877b80a	cbf66244-42c8-4df6-aca7-932e77bb5e0e	LIVING	1.71	A3CB59DE-5893-4FA2-B4D5-EDA612480E76	Alive	FEMALE	TUMOR FREE	0	2	15	No	WHITE	Primary Tumor
TCGA-AN-A0AJ-01	TCGA-AN-A0AJ			T3	M0	-29131	dextran coated charcoal	0.685	244	63	NA	79		8.02	DiseaseFree	Negative	NOT HISPANIC OR LATINO	Tumor resection		2010-12-20	C50.9	YES	310	C50.9	8522/3	NO	0		Post (prior bilateral ovariectomy OR >12 mo since LMP with no prior hysterectomy)	65	No	N0	Stage IIB		FALSE	9646160a-f1f9-437b-8c7d-efb0b57bfb97	1c0714ec-70a9-4902-bd98-8b0fb002c084	LIVING	8.02	6E2365F3-0875-4949-8409-7E26BBCDE700	Alive	FEMALE	TUMOR FREE	0	0	9	No	WHITE	Primary Tumor
TCGA-AN-A0AK-01	TCGA-AN-A0AK			T2	M0	-27977	dextran coated charcoal	0.282	224	58	NA	76		7.36	DiseaseFree	Negative	NOT HISPANIC OR LATINO	Tumor resection		2010-12-21	C50.9	YES	290	C50.9	8500/3	NO	0		Post (prior bilateral ovariectomy OR >12 mo since LMP with no prior hysterectomy)	1049	No	N0	Stage IIA		FALSE	9e894662-b718-40f8-8899-b5e036cfbd76	fe23a254-a0a4-452c-a2ba-685f66738a86	LIVING	7.36	12683FCC-4828-4D9A-9B35-E4B7295CC417	Alive	FEMALE	TUMOR FREE	0	0	11	No	WHITE	Primary Tumor
TCGA-AN-A0AL-01	TCGA-AN-A0AL			T4	M0	-15286	dextran coated charcoal	0.441	198	49	NA	41		6.5	DiseaseFree	Negative	NOT HISPANIC OR LATINO	Tumor resection		2010-12-21	C50.9	YES	300	C50.9	8500/3	NO	0		Pre (<6 months since LMP AND no prior bilateral ovariectomy AND not on estrogen replacement)	71	No	N0	Stage IIIB		FALSE	3e9f93c0-aa79-4b4c-bd6c-b3325912362a	5b9560c4-0632-479a-835f-67d373e59206	LIVING	6.5	20F4DBD9-02FA-4FFD-AEF5-234910D31263	Alive	FEMALE	TUMOR FREE	0	0	5	No	WHITE	Primary Tumor
TCGA-AN-A0AM-01	TCGA-AN-A0AM			T2	M0	-20713		0.279	5	47	NA	56		0.16	DiseaseFree	Negative	NOT HISPANIC OR LATINO	Tumor resection		2010-12-28	C50.9	YES	350	C50.9	8500/3	NO	0		Post (prior bilateral ovariectomy OR >12 mo since LMP with no prior hysterectomy)	57	No	N0	Stage IIA		FALSE	00a2d166-78c9-4687-a195-3d6315c27574	2e4b5ba3-ccc8-40f6-80ac-edaea1685204	LIVING	0.16	7189A8A8-EB8B-4795-B7FE-725CCC4B7FA7	Alive	FEMALE	TUMOR FREE	0	0	20	No	WHITE	Primary Tumor
TCGA-AN-A0AS-01	TCGA-AN-A0AS			T2	M0	-25658		0.249	10	33	NA	70		0.33	DiseaseFree	Negative	NOT HISPANIC OR LATINO	Tumor resection		2010-12-28	C50.9	YES	290	C50.9	8500/3	NO	0		Post (prior bilateral ovariectomy OR >12 mo since LMP with no prior hysterectomy)	42	No	N2	Stage IIIA		FALSE	7c2a8440-0206-4039-8474-8d62f6c7de0c	9d772786-6ac9-4e52-9899-023ffa7247d2	LIVING	0.33	0D1ACC76-910E-4243-A229-5F76B5A3299A	Alive	FEMALE	TUMOR FREE	0	4	9	No	WHITE	Primary Tumor
TCGA-AN-A0AT-01	TCGA-AN-A0AT			T2	M0	-22798		0.455	10	28	NA	62		0.33	DiseaseFree	Negative	NOT HISPANIC OR LATINO	Tumor resection		2010-12-28	C50.9	YES	170	C50.9	8500/3	NO	0		Post (prior bilateral ovariectomy OR >12 mo since LMP with no prior hysterectomy)	98	No	N0	Stage IIA		FALSE	05506f4c-e701-4a9d-ae06-97f066aade43	b2905a3f-810b-4e74-af5c-42d513d91746	LIVING	0.33	3E8F2012-A457-4358-9C8B-23292374A743	Alive	FEMALE	TUMOR FREE	0	0	10	No	WHITE	Primary Tumor
TCGA-AN-A0FD-01	TCGA-AN-A0FD			T2	M0	-26007	dextran coated charcoal	0.171	196	84	NA	71		6.44	DiseaseFree	Negative	NOT HISPANIC OR LATINO	Tumor resection		2010-12-20	C50.9	YES	260	C50.9	8500/3	NO	0		Post (prior bilateral ovariectomy OR >12 mo since LMP with no prior hysterectomy)	33	No	N0	Stage IIA		FALSE	c6086936-7544-4da0-8c0c-114166848483	439d2ec5-1059-4556-b886-60b42b6db1d7	LIVING	6.44	F124155D-6131-47F6-8320-46A41AB125D3	Alive	FEMALE	TUMOR FREE	0	0	14	No	WHITE	Primary Tumor
TCGA-AN-A0FF-01	TCGA-AN-A0FF			T1b	M0	-11929	dextran coated charcoal	0.151	141	75	NA	32		4.63	DiseaseFree	Negative	NOT HISPANIC OR LATINO	Tumor resection		2010-12-27	C50.9	YES	300	C50.9	8500/3	NO	0		Pre (<6 months since LMP AND no prior bilateral ovariectomy AND not on estrogen replacement)	23	No	N0	Stage IA		FALSE	d5cab7f5-e4f1-40ee-a0c8-4c8004c1c9a0	d78ecfd3-1a99-47e6-bb5f-a13c57148a76	LIVING	4.63	9B4BA15D-A071-4213-AD2C-075A04ED48CD	Alive	FEMALE	TUMOR FREE	0	0	14	No	WHITE	Primary Tumor
TCGA-AN-A0FJ-01	TCGA-AN-A0FJ			T2	M1	-21910	dextran coated charcoal	0.619	242	70	NA	59		7.95	DiseaseFree	Negative	NOT HISPANIC OR LATINO	Tumor resection		2010-12-27	C50.9	YES	280	C50.9	8500/3	NO	0		Peri (6-12 months since last menstrual period)	73	No	N2	Stage IV		FALSE	546248b0-22a0-4b70-a437-76fb0a238a0d	d09d5a48-2dc0-4d0f-8b20-d1f11a08143b	LIVING	7.95	59163BD6-41E8-4489-81F0-036484447886	Alive	FEMALE	TUMOR FREE	0	8	14	No	WHITE	Primary Tumor
TCGA-AN-A0FK-01	TCGA-AN-A0FK			T4	M0	-32462	dextran coated charcoal	0.552	213	69	NA	88		7	DiseaseFree	Negative	NOT HISPANIC OR LATINO	Tumor resection		2010-12-20	C50.9	YES	340	C50.9	8500/3	NO	0		Post (prior bilateral ovariectomy OR >12 mo since LMP with no prior hysterectomy)	33	No	N0	Stage IIIB		FALSE	2f4cbedf-ed7e-45a2-bf34-f1d1e696bdde	27b748ba-fef9-4eaa-96b6-a8ad31b5c478	LIVING	7	5F5FF3CA-2DBB-4DE1-9190-1FE36E2B5ACB	Alive	FEMALE	TUMOR FREE	0	0	7	No	WHITE	Primary Tumor
TCGA-AN-A0FL-01	TCGA-AN-A0FL			T2	M0	-22805	dextran coated charcoal	0.538	231	69	NA	62		7.59	DiseaseFree	Negative	NOT HISPANIC OR LATINO	Tumor resection		2010-12-28	C50.9	YES	310	C50.9	8500/3	NO	0		Post (prior bilateral ovariectomy OR >12 mo since LMP with no prior hysterectomy)	149	No	N0	Stage IIA		FALSE	baf1207d-7d1a-4cad-ba58-62c26be2415e	2f2d2e05-c6ea-4f29-8bed-040bd9c46911	LIVING	7.59	049A2CA6-951A-452F-963A-F54FE87ECA31	Alive	FEMALE	TUMOR FREE	0	0	8	No	WHITE	Primary Tumor
TCGA-AN-A0FN-01	TCGA-AN-A0FN			T1c	M0	-22629	dextran coated charcoal	0.0003851	218	57	NA	61		7.16	DiseaseFree	Negative	NOT HISPANIC OR LATINO	Tumor resection		2010-12-28	C50.9	YES	110	C50.9	8520/3	NO	0		Post (prior bilateral ovariectomy OR >12 mo since LMP with no prior hysterectomy)	31	No	N0	Stage IB		FALSE	c2a742fe-3e8b-4210-85a6-7191a1123609	c7da9758-e55a-4ed7-984f-cd86e2f6ea20	LIVING	7.16	6B53F577-5EB6-4AF5-9773-3654D3432BE4	Alive	FEMALE	TUMOR FREE	0	0	10	No	WHITE	Primary Tumor
TCGA-AN-A0FS-01	TCGA-AN-A0FS			T1c	M0	-20352	dextran coated charcoal	0.105	191	44	NA	55		6.27	DiseaseFree	Negative	NOT HISPANIC OR LATINO	Tumor resection		2010-12-20	C50.9	YES	170	C50.9	8520/3	NO	0		Peri (6-12 months since last menstrual period)	47	No	N0	Stage IB		FALSE	10c9be1e-2cc0-45e4-8d2c-c013ea63ef05	181ff04b-8315-4069-a4cc-e102796ecde4	LIVING	6.27	3CD1D537-29E4-479B-99FA-26D27E192948	Alive	FEMALE	TUMOR FREE	0	0	14	No	WHITE	Primary Tumor
TCGA-AN-A0FT-01	TCGA-AN-A0FT			T2	M0	-23300	dextran coated charcoal	0.581	183	44	NA	63		6.01	DiseaseFree	Negative	NOT HISPANIC OR LATINO	Tumor resection		2010-12-28	C50.9	YES	130	C50.9	8500/3	NO	0		Post (prior bilateral ovariectomy OR >12 mo since LMP with no prior hysterectomy)	73	No	N1	Stage IIB		FALSE	baf5e81f-2322-41ec-9053-b9559a7993bc	071f43e9-e416-453b-a519-c197c5aaf1d1	LIVING	6.01	338D5387-0CFB-4D91-944F-1F054C21C769	Alive	FEMALE	TUMOR FREE	0	1	7	No	WHITE	Primary Tumor
TCGA-AN-A0FV-01	TCGA-AN-A0FV			T2	M0	-21479		0.54	10	42	NA	58		0.33	DiseaseFree	Negative	NOT HISPANIC OR LATINO	Tumor resection		2010-12-28	C50.9	YES	180	C50.9	8500/3	NO	0		Post (prior bilateral ovariectomy OR >12 mo since LMP with no prior hysterectomy)	65	No	N0	Stage IIA		FALSE	2e8e70f2-c781-44c2-8f12-1f8c2f536aa3	8046edc0-e5f9-42ec-85f2-6cc66596633f	LIVING	0.33	5AEE90E0-A9A1-4944-AD6A-2675764D869D	Alive	FEMALE	TUMOR FREE	0	0	12	No	WHITE	Primary Tumor
TCGA-AN-A0FW-01	TCGA-AN-A0FW			T2	M0	-24692		0.195	11	41	NA	67		0.36	DiseaseFree	Negative	NOT HISPANIC OR LATINO	Tumor resection		2010-12-28	C50.9	YES	180	C50.9	8500/3	NO	0		Post (prior bilateral ovariectomy OR >12 mo since LMP with no prior hysterectomy)	99	No	N2	Stage IIIA		FALSE	e112b452-8850-4353-bfed-0dbdc243290b	a4910543-8bfd-4cd9-9eab-cf16aead9537	LIVING	0.36	03BD8920-CA01-4818-BBD7-925DDD3F6908	Alive	FEMALE	TUMOR FREE	0	2	14	No	WHITE	Primary Tumor
TCGA-AN-A0FX-01	TCGA-AN-A0FX			T2	M0	-19309		0.54	10	34	NA	52		0.33	DiseaseFree	Negative	NOT HISPANIC OR LATINO	Tumor resection		2010-11-28	C50.9	YES	230	C50.9	8500/3	NO	0		Post (prior bilateral ovariectomy OR >12 mo since LMP with no prior hysterectomy)	128	No	N0	Stage IIA		FALSE	13b860c3-8048-4dc9-9eb0-7480bc660837	78feb5be-f9d1-4cc6-baba-274136b9487c	LIVING	0.33	0CC079D3-EB90-47B5-B554-599A67C9E12A	Alive	FEMALE	TUMOR FREE	0	0	12	No	WHITE	Primary Tumor
TCGA-AN-A0FY-01	TCGA-AN-A0FY			T1c	M0	-20347		0.35	10	34	NA	55		0.33	DiseaseFree	Negative	NOT HISPANIC OR LATINO	Tumor resection		2010-12-29	C50.9	YES	170	C50.9	8500/3	NO	0		Post (prior bilateral ovariectomy OR >12 mo since LMP with no prior hysterectomy)	61	No	N0	Stage IB		FALSE	de75d0b9-0f47-4732-8df5-05c350cfcd32	76c09917-15f9-4908-ab22-ea1401abcb3b	LIVING	0.33	6C520037-2A9B-41CB-8362-97FFCA2AA6E2	Alive	FEMALE	TUMOR FREE	0	0	11	No	WHITE	Primary Tumor
TCGA-AN-A0FZ-01	TCGA-AN-A0FZ			T2	M0	-16533		0.45	10	34	NA	45		0.33	DiseaseFree	Negative	NOT HISPANIC OR LATINO	Tumor resection		2010-12-29	C50.9	YES	230	C50.9	8500/3	NO	0		Pre (<6 months since LMP AND no prior bilateral ovariectomy AND not on estrogen replacement)	43	No	N2	Stage IIIA		FALSE	8240c4ae-f878-4882-aa07-7857c7ac52cf	199c6271-b0af-489c-99b8-fc76e7e66cf2	LIVING	0.33	8CC70CDC-01EC-4E2B-84C1-F1C946602CCE	Alive	FEMALE	TUMOR FREE	0	1	14	No	WHITE	Primary Tumor
TCGA-AN-A0XL-01	TCGA-AN-A0XL		7th	T2	M0	-22341		0.333	10	169	NA	61		0.33	DiseaseFree	Negative	NOT HISPANIC OR LATINO	Tumor resection		2011-03-25	C50.9	YES	130	C50.9	8500/3	NO	0	YES	Post (prior bilateral ovariectomy OR >12 mo since LMP with no prior hysterectomy)	23	No	N0	Stage IIA		TRUE	4649dee3-b668-44cd-ab97-3834de3ef8f8	4ad4076c-16c8-425e-9400-57fbf30bffee	LIVING	0.33	A85A959B-F18C-43D3-8BBF-770DA2189462	Alive	FEMALE		NA	0	14	No	WHITE	Primary Tumor
TCGA-AN-A0XN-01	TCGA-AN-A0XN		7th	T2	M0	-25029		0.513	10	163	NA	68		0.33	DiseaseFree	Negative	NOT HISPANIC OR LATINO	Tumor resection		2011-03-25	C50.9	YES	180	C50.9	8500/3	NO	0	YES	Post (prior bilateral ovariectomy OR >12 mo since LMP with no prior hysterectomy)	110	No	N2	Stage IIIA		TRUE	4e3699da-4367-4a43-9d66-a117d3ad460d	41dc8345-7968-42b2-af20-8501b9d2223d	LIVING	0.33	4C9C9D24-07E1-47BE-8D34-F94693576BD2	Alive	FEMALE		NA	1	15	No	WHITE	Primary Tumor
TCGA-AN-A0XO-01	TCGA-AN-A0XO		7th	T2	M0	-21640		0.209	375	163	NA	59		12.3	DiseaseFree	Negative	NOT HISPANIC OR LATINO	Tumor resection		2011-03-25	C50.9	YES	190	C50.9	8500/3	NO	0	YES	Post (prior bilateral ovariectomy OR >12 mo since LMP with no prior hysterectomy)	40	No	N2	Stage IIIA		TRUE	195b6731-6ae6-416e-a345-0eb8874a0ca2	82371bb4-13dd-4868-9872-bd3e3e1da67d	LIVING	12.3	3423E8AE-CE73-4212-BB72-2AF92FD0BC2D	Alive	FEMALE		NA	2	12	No	WHITE	Primary Tumor
TCGA-AN-A0XP-01	TCGA-AN-A0XP		7th	T2	M0	-25305		0.162	9	162	NA	69		0.3	DiseaseFree	Negative	NOT HISPANIC OR LATINO	Tumor resection		2011-03-25	C50.9	YES	160	C50.9	8500/3	NO	0	YES	Post (prior bilateral ovariectomy OR >12 mo since LMP with no prior hysterectomy)	26	No	N2	Stage IIIA		TRUE	cf0e7e4e-b857-4db5-9ae2-551a899f77be	1359c419-d678-4a51-a50a-1cdf258bb58b	LIVING	0.3	80E9B7CE-0D5D-4C01-A8E3-E6345BE145EC	Alive	FEMALE		NA	1	19	No	WHITE	Primary Tumor
TCGA-AN-A0XR-01	TCGA-AN-A0XR		7th	T2	M0	-20381		0.12	10	155	NA	55		0.33	DiseaseFree	Negative	NOT HISPANIC OR LATINO	Tumor resection		2011-03-25	C50.9	YES	130	C50.9	8500/3	NO	0	YES	Post (prior bilateral ovariectomy OR >12 mo since LMP with no prior hysterectomy)	30	No	N2	Stage IIIA		TRUE	f51af6db-2655-47fb-9ffc-83a503a728ea	6edcdb8a-80e8-42a8-86ff-3950c1f3cb89	LIVING	0.33	1351520E-9B6A-4F06-B631-DF374396C7E6	Alive	FEMALE		NA	7	14	No	WHITE	Primary Tumor
TCGA-AN-A0XS-01	TCGA-AN-A0XS		7th	T2	M0	-23358		0.0804	10	120	NA	63		0.33	DiseaseFree	Negative	NOT HISPANIC OR LATINO	Tumor resection		2011-03-28	C50.9	YES	210	C50.9	8500/3	NO	0	YES	Post (prior bilateral ovariectomy OR >12 mo since LMP with no prior hysterectomy)	26	No	N2	Stage IIIA		TRUE	95e949d3-b1f3-46c6-9451-8fe92c99e4cf	464c704d-fa2e-4ec1-b77c-4441422082eb	LIVING	0.33	D5C9D3FF-3799-4773-8A86-B000DBE42BD8	Alive	FEMALE		NA	1	11	No	WHITE	Primary Tumor
TCGA-AN-A0XT-01	TCGA-AN-A0XT		7th	T2	M0	-19794		0.308	10	114	NA	54		0.33	DiseaseFree	Negative	NOT HISPANIC OR LATINO	Tumor resection		2011-03-28	C50.9	YES	160	C50.9	8500/3	NO	0	YES	Post (prior bilateral ovariectomy OR >12 mo since LMP with no prior hysterectomy)	7	No	N2	Stage IIIA		TRUE	3e25056d-d137-49f5-abaa-f68509426600	73ea6778-4dbe-4300-a80b-bf41f6ac5fd9	LIVING	0.33	3C94BBAC-923E-43F0-B5DC-01207868AD05	Alive	FEMALE		NA	1	17	No	WHITE	Primary Tumor
TCGA-AN-A0XU-01	TCGA-AN-A0XU		7th	T2	M0	-20052		0.483	10	106	NA	54		0.33	DiseaseFree	Negative	NOT HISPANIC OR LATINO	Tumor resection		2011-03-28	C50.9	YES	180	C50.9	8500/3	NO	0	YES	Post (prior bilateral ovariectomy OR >12 mo since LMP with no prior hysterectomy)	94	No	N0	Stage IIA		TRUE	a1da9db1-db11-4f4d-a249-c738db81b87e	ee368eb1-55e1-471e-b88b-bab896e37b5c	LIVING	0.33	8216B837-DCF3-4E7F-A72A-212655F394F0	Alive	FEMALE		NA	0	16	No	WHITE	Primary Tumor
TCGA-AN-A0XV-01	TCGA-AN-A0XV		7th	T2	M0	-24779	dextran coated charcoal	0.0851	162	121	NA	67		5.32	DiseaseFree	Negative	NOT HISPANIC OR LATINO	Tumor resection		2011-03-29	C50.9	YES	100	C50.9	8500/3	NO	0	YES	Post (prior bilateral ovariectomy OR >12 mo since LMP with no prior hysterectomy)	27	No	N2	Stage IIIA		TRUE	ac18b3a3-8d52-4e35-8625-673171a7fd92	f45e5bb1-c07d-4869-8acd-03036629e83d	LIVING	5.32	5F626AB6-EEB5-4005-97C5-9E48D9FA7730	Alive	FEMALE		NA	7	16	No	WHITE	Primary Tumor
TCGA-AN-A0XW-01	TCGA-AN-A0XW		7th	T2	M0	-13208	dextran coated charcoal	0.249	170	121	NA	36		5.58	DiseaseFree	Negative	NOT HISPANIC OR LATINO	Tumor resection		2011-03-29	C50.9	YES	270	C50.9	8500/3	NO	0	YES	Pre (<6 months since LMP AND no prior bilateral ovariectomy AND not on estrogen replacement)	196	No	N2	Stage IIIA		TRUE	39de7761-e762-4811-b95c-8216b79ae06b	38bf35cd-b2f7-4532-9bff-d95cfe2cafd5	LIVING	5.58	5CBC6417-4E3D-4E9C-AE93-A56B777EF2F4	Alive	FEMALE		NA	1	14	No	WHITE	Primary Tumor
TCGA-AO-A03L-01	TCGA-AO-A03L		6th	T3	M0	-12443		0.653	2442	2456	NA	34		80.2	DiseaseFree	Negative	NOT HISPANIC OR LATINO	Core needle biopsy		2010-12-07	C50.9	YES	680	C50.9	8500/3	NO	0		Pre (<6 months since LMP AND no prior bilateral ovariectomy AND not on estrogen replacement)	23	No	N2	Stage IIIA		TRUE	1174f6e4-ffbe-4e59-a000-8d861c968369	00f81e98-e5c3-43b2-9757-f769ec17f3f8	LIVING	80.2	FF7212E5-9A44-4659-B3B9-3EF2DB7A9E6D	Alive	FEMALE	TUMOR FREE	NA	4	17	No	ASIAN	Primary Tumor
TCGA-AO-A03M-01	TCGA-AO-A03M			T1c	M0	-10616		0.163	1455	1414	NA	29		47.8	DiseaseFree	Negative	NOT HISPANIC OR LATINO	Core needle biopsy		2011-01-09	C50.9	YES	310	C50.9	8500/3	NO	0		Pre (<6 months since LMP AND no prior bilateral ovariectomy AND not on estrogen replacement)	670	No	N0 (i-)	Stage IA		TRUE	095c7985-3842-494f-b591-706ad1cd2133	79af2c1a-1da2-4207-8ce8-b5d3d418066d	LIVING	47.8	13935A03-5573-4223-9FA8-3D1931656196	Alive	FEMALE	TUMOR FREE	0	0	2	No	WHITE	Primary Tumor
TCGA-AO-A03N-01	TCGA-AO-A03N		6th	T2	M0	-21816		0.497	1645	1596	NA	59		54	Recurred/Progressed	Negative	NOT HISPANIC OR LATINO	Core needle biopsy		2011-01-13	C50.9	YES	360	C50.9	8500/3	NO	0		Post (prior bilateral ovariectomy OR >12 mo since LMP with no prior hysterectomy)	83	No	N1a	Stage IIB		TRUE	9435447e-d65f-408b-863b-6576b1d652dd	06b3e3ca-24b9-4e19-9e59-b51cc6d6735b	LIVING	66.7	DBFF850D-2B82-4605-B354-A20AC76A6A13	Alive	FEMALE	WITH TUMOR	NA	2	19	No	WHITE	Primary Tumor
TCGA-AO-A03O-01	TCGA-AO-A03O			T2	M0	-25362	>10% STAINING = POSITIVE	0.354	NA	2694	2483	69		NA		Negative	NOT HISPANIC OR LATINO	Core needle biopsy		2010-09-19	C50.9	YES	690	C50.9	8500/3	NO	0		Post (prior bilateral ovariectomy OR >12 mo since LMP with no prior hysterectomy)	68	No	N0 (i-)	Stage IIA		TRUE	1111fb30-46ce-4722-98da-ec9ba2323d90	a19fbcc1-a781-4496-97ed-487aa83aae29	DECEASED	81.6	FE9C56C4-B6D4-4054-A58C-13642370052E	Dead	FEMALE	TUMOR FREE	0	0	17	No	BLACK OR AFRICAN AMERICAN	Primary Tumor
TCGA-AO-A03P-01	TCGA-AO-A03P			T2	M0	-19724		0.422	2576	2414	NA	54		63.1	Recurred/Progressed	Close	NOT HISPANIC OR LATINO	Core needle biopsy		2010-09-19	C50.9	YES	370	C50.9	8500/3	NO	0		Post (prior bilateral ovariectomy OR >12 mo since LMP with no prior hysterectomy)	38	No	N1	Stage IIA		TRUE	2d4c778c-7f77-4f0a-8261-2086accf15fd	05507d2c-3dea-4554-8f06-039fd555309a	DECEASED	95.6	0BFAB667-8B40-46AE-A224-535573E268C7	Dead	FEMALE	WITH TUMOR	2	0	26	No	BLACK OR AFRICAN AMERICAN	Primary Tumor
TCGA-AO-A03R-01	TCGA-AO-A03R			T2	M0	-20930		0.244	1707	1608	NA	57		68.7	DiseaseFree	Negative	NOT HISPANIC OR LATINO	Core needle biopsy		2010-09-19	C50.9	YES	140	C50.9	8500/3	NO	0		Post (prior bilateral ovariectomy OR >12 mo since LMP with no prior hysterectomy)	35	No	N1a	Stage IIB		TRUE	2e82e576-3095-4aee-9853-65f676647c34	1be0c409-dd2c-4d82-80c4-2a71ec4d17d4	LIVING	68.7	D779EEF8-C83C-4CCA-A140-9BF15DCF14AE	Alive	FEMALE	TUMOR FREE	0	3	26	No	WHITE	Primary Tumor
TCGA-AO-A03T-01	TCGA-AO-A03T		6th	T2	M0	-15540		0.268	1187	1031	NA	42		47.8	DiseaseFree	Negative	NOT HISPANIC OR LATINO	Core needle biopsy		2010-09-19	C50.9	YES	140	C50.9	8500/3	NO	0		Pre (<6 months since LMP AND no prior bilateral ovariectomy AND not on estrogen replacement)	85	No	N1a	Stage IIB		TRUE	dd6b64a8-d546-4fd1-bbbd-ac9703791cae	a919faa8-0df6-4a94-b12d-46d99df6f26d	LIVING	47.8	D5EF8C37-811E-42B7-84E5-E6ED71217971	Alive	FEMALE	TUMOR FREE	NA	2	12	No	WHITE	Primary Tumor
TCGA-AO-A03U-01	TCGA-AO-A03U			T1c	M0	-11354		0.0009869	NA	3254	1796	31		53	Recurred/Progressed	Negative	NOT HISPANIC OR LATINO	Core needle biopsy		2011-01-09	C50.9	YES	170	C50.9	8502/3	NO	0		Pre (<6 months since LMP AND no prior bilateral ovariectomy AND not on estrogen replacement)	8	No	N0 (i-)	Stage IA		TRUE	0685edd2-ce1c-4e0e-8dda-393139af4223	dfb7fb86-5f46-4666-a008-395aa0881267	DECEASED	59	389FEF48-9C2A-4164-99BF-1266C56CF948	Dead	FEMALE	TUMOR FREE	0	0	8	No	WHITE	Primary Tumor
TCGA-AO-A03V-01	TCGA-AO-A03V		6th	T1c	M0	-15284		0.313	886	670	NA	41		29.1	DiseaseFree	Negative	NOT HISPANIC OR LATINO	Core needle biopsy		2011-01-09	C50.9	YES	70	C50.9	8500/3	NO	0		Peri (6-12 months since last menstrual period)	52	No	N0 (i-)	Stage I		TRUE	a6cb373a-1604-4e25-bd81-da6c3e4f06ee	a8484534-e92a-49a7-8818-d21606d19701	LIVING	29.1	63E34973-F630-4295-AC1B-94F81BBEBE41	Alive	FEMALE	TUMOR FREE	0	0	2	No	WHITE	Primary Tumor
TCGA-AO-A0J2-01	TCGA-AO-A0J2			T1c	M0	-15324		0.716	585	668	NA	41		32.8	DiseaseFree	Negative	NOT HISPANIC OR LATINO	Core needle biopsy		2010-09-19	C50.9	YES	260	C50.9	8500/3	NO	0		Pre (<6 months since LMP AND no prior bilateral ovariectomy AND not on estrogen replacement)	52	No	N0 (i-)	Stage IA		TRUE	d2f2560c-ec80-4fea-9474-c47a2e85ea95	4f5e142f-d936-469d-abaa-37baf6f045af	LIVING	32.8	DB0B1C9D-6B94-46EF-A84E-3D912E08B7FD	Alive	FEMALE	TUMOR FREE	0	0	5	No	WHITE	Primary Tumor
TCGA-AO-A0J3-01	TCGA-AO-A0J3			T2	M0	-24519		0.536	302	220	NA	67		21.4	DiseaseFree	Negative	NOT HISPANIC OR LATINO	Core needle biopsy		2010-09-19	C50.9	YES	1180	C50.9	8523/3	NO	0		Post (prior bilateral ovariectomy OR >12 mo since LMP with no prior hysterectomy)	69	No	N1b	Stage IIB		TRUE	39cde586-df95-435f-b9a6-73b0c0ee5e92	f93c9b46-b07e-4a5f-9b3e-d7cebe34ebed	LIVING	21.4	29C262B5-D49D-4125-9661-19033A8EC6A8	Alive	FEMALE	TUMOR FREE	0	1	36	No	WHITE	Primary Tumor
TCGA-AO-A0J4-01	TCGA-AO-A0J4			T1c	M0	-15052		0.443	294	224	NA	41		17.6	DiseaseFree	Negative	NOT HISPANIC OR LATINO	Core needle biopsy		2010-09-19	C50.9	YES	130	C50.9	8500/3	NO	0		Pre (<6 months since LMP AND no prior bilateral ovariectomy AND not on estrogen replacement)	80	No	N0 (i-)	Stage IA		TRUE	a9b7d7fe-be31-4f71-afee-c1bfdf511888	cf11642a-eb96-4b37-b914-371c71f8e0ca	LIVING	17.6	846851BE-3D24-46F0-A6BE-CEB22C7D0F62	Alive	FEMALE	TUMOR FREE	0	0	4	No	BLACK OR AFRICAN AMERICAN	Primary Tumor
TCGA-AO-A0J5-01	TCGA-AO-A0J5			T4	M1	-17815		0.127	735	554	NA	48		NA		Close	NOT HISPANIC OR LATINO	Core needle biopsy		2010-12-07	C50.9	YES	500	C50.9	8523/3	NO	0		Pre (<6 months since LMP AND no prior bilateral ovariectomy AND not on estrogen replacement)	61	Yes	N1a	Stage IV		TRUE	c1442467-d618-435f-8792-b1a18f696f1a	0bbcc10c-ff75-433b-a58b-7915d27eb7d6	DECEASED	26	5EFC16F4-7FC7-479E-93F7-AEDC2D350A22	Dead	FEMALE	WITH TUMOR	NA	2	2	No	WHITE	Primary Tumor
TCGA-AO-A0J6-01	TCGA-AO-A0J6			T2	M0	-22462		0.467	775	748	NA	61		37.5	DiseaseFree	Negative	NOT HISPANIC OR LATINO	Fine needle aspiration biopsy		2010-09-19	C50.9	YES	390	C50.9	8500/3	NO	0		Post (prior bilateral ovariectomy OR >12 mo since LMP with no prior hysterectomy)	111	No	N0 (i-)	Stage IIA		TRUE	e9f4f373-37a5-48ad-a1a0-b0d47820111a	0c12ea89-eeb4-4865-91eb-10cf75884c21	LIVING	37.5	CE2FF4D3-B82C-4435-AE1C-3E2E6F104271	Alive	FEMALE	TUMOR FREE	0	0	4	No	WHITE	Primary Tumor
TCGA-AO-A0J7-01	TCGA-AO-A0J7			T2	M0	-26281		0.767	261	177	NA	71		20.3	DiseaseFree	Negative	NOT HISPANIC OR LATINO	Core needle biopsy		2010-09-19	C50.9	YES	300	C50.9	8523/3	NO	0		Post (prior bilateral ovariectomy OR >12 mo since LMP with no prior hysterectomy)	25	No	N1	Stage IIB		TRUE	9536bec0-dae0-4d63-a1b3-956741835243	efbff161-d65a-4009-8e95-50d7f6cae435	LIVING	20.3	4022B2EB-04C3-43F6-9D2C-1A47D80EF6EE	Alive	FEMALE	TUMOR FREE	NA	3	11	No	WHITE	Primary Tumor
TCGA-AO-A0J8-01	TCGA-AO-A0J8			T2	M0	-22284		0.131	277	241	NA	61		22.3	DiseaseFree	Negative	NOT HISPANIC OR LATINO	Core needle biopsy		2010-09-19	C50.9	YES	670	C50.9	8520/3	NO	0		Post (prior bilateral ovariectomy OR >12 mo since LMP with no prior hysterectomy)	20	No	N0 (i+)	Stage IIA		TRUE	02bf5203-f9cd-4c5a-97b4-e5584dc22325	c6e14fab-a2a2-4102-8b70-2865757d2f48	LIVING	22.3	03C7A677-C223-47D6-869E-E6C3250B0C08	Alive	FEMALE	TUMOR FREE	1	0	2	No	WHITE	Primary Tumor
TCGA-AO-A0J9-01	TCGA-AO-A0J9			T2	M0	-22642		0.362	1256	1207	NA	61		35	Recurred/Progressed	Positive	NOT HISPANIC OR LATINO	Core needle biopsy		2010-09-19	C50.9	YES	430	C50.9	8520/3	NO	0		Post (prior bilateral ovariectomy OR >12 mo since LMP with no prior hysterectomy)	88	No	N3	Stage IIIC		TRUE	a4903de8-6cf5-4541-8ec7-065beace8b44	0c8df249-80de-4675-93e5-d06ad8ea3001	LIVING	53	1E3F3136-6D86-4470-85AA-55B11C9E24CD	Alive	FEMALE	WITH TUMOR	0	15	32	No	WHITE	Primary Tumor
TCGA-AO-A0JA-01	TCGA-AO-A0JA			T2	M0	-13307		0.303	346	258	NA	36		4.7	Recurred/Progressed	Negative	NOT HISPANIC OR LATINO	Core needle biopsy		2010-09-19	C50.9	YES	100	C50.9	8500/3	NO	0		Pre (<6 months since LMP AND no prior bilateral ovariectomy AND not on estrogen replacement)	29	No	N3	Stage IIIC		TRUE	86b7b206-8e69-432d-acc9-bccce710955e	8e666196-bf9d-4b71-9c66-ee9272b671a5	LIVING	21.5	2E8A1816-E963-4063-B2F0-6289514084A5	Alive	FEMALE	WITH TUMOR	NA	11	11	No	BLACK OR AFRICAN AMERICAN	Primary Tumor
TCGA-AO-A0JC-01	TCGA-AO-A0JC			T2	M0	-23404		6.09e-05	1547	1522	NA	64		50.8	DiseaseFree	Negative	NOT HISPANIC OR LATINO	Core needle biopsy		2010-09-20	C50.9	YES	550	C50.9	8500/3	NO	0		Post (prior bilateral ovariectomy OR >12 mo since LMP with no prior hysterectomy)	19	No	N0 (i-)	Stage IIA		TRUE	03565036-b6d3-432f-8d9a-7099818e0788	63aa7e64-3d7c-43e8-87fa-f52855faed80	LIVING	50.8	A1F0FEB5-6FEF-4FF7-AA1E-8EAAE551138B	Alive	FEMALE	TUMOR FREE	0	0	12	No	WHITE	Primary Tumor
TCGA-AO-A0JD-01	TCGA-AO-A0JD			T3	M0	-21831		0.393	1813	1863	NA	59		71.9	DiseaseFree	Negative	NOT HISPANIC OR LATINO	Core needle biopsy		2010-09-20	C50.9	YES	230	C50.9	8500/3	NO	0		Post (prior bilateral ovariectomy OR >12 mo since LMP with no prior hysterectomy)	92	No	N1a	Stage IIIA		TRUE	0a229f95-0ea1-4d63-953e-74f5ec2f3028	6292ad22-cf2f-4e72-a95d-2441d667a147	LIVING	71.9	E8A43FF3-3D98-45EE-9567-6EED4DA38274	Alive	FEMALE	TUMOR FREE	0	3	27	No	WHITE	Primary Tumor
TCGA-AO-A0JE-01	TCGA-AO-A0JE			T2	M0	-19516		0.362	1966	1910	NA	53		76.7	DiseaseFree	Positive	NOT HISPANIC OR LATINO	Core needle biopsy		2010-09-20	C50.9	YES	550	C50.9	8500/3	NO	0		Post (prior bilateral ovariectomy OR >12 mo since LMP with no prior hysterectomy)	37	No	N2a	Stage IIIA		TRUE	36fe6152-f61e-4948-9ccc-23ac01a9d77d	0a43ad98-2671-4701-9e5d-35ad63e8ad50	LIVING	76.7	15CAD156-1E40-4C83-B3ED-484964FE407F	Alive	FEMALE	TUMOR FREE	NA	8	29	No	BLACK OR AFRICAN AMERICAN	Primary Tumor
TCGA-AO-A0JF-01	TCGA-AO-A0JF			T1c	M0	-24923		0.0531	354	273	NA	68		21.4	DiseaseFree	Negative	NOT HISPANIC OR LATINO	Core needle biopsy		2010-09-20	C50.9	YES	410	C50.9	8500/3	NO	0		Post (prior bilateral ovariectomy OR >12 mo since LMP with no prior hysterectomy)	24	No	N1a	Stage IIA		TRUE	f357fe19-5359-4662-8ce9-aa996132283b	ddee0b07-2771-40c7-bdda-c1100958f0d8	LIVING	21.4	D58E5D64-B5B9-4487-8E46-225AE3617C14	Alive	FEMALE	TUMOR FREE	0	2	14	No	WHITE	Primary Tumor
TCGA-AO-A0JG-01	TCGA-AO-A0JG			T2	M0	-18021		0.228	449	395	NA	49		26.2	DiseaseFree	Close	NOT HISPANIC OR LATINO	Core needle biopsy		2010-09-20	C50.9	YES	410	C50.9	8523/3	NO	0		Post (prior bilateral ovariectomy OR >12 mo since LMP with no prior hysterectomy)	12	No	N2a	Stage IIIA		TRUE	58959e88-54e2-4558-9664-2effda7403dc	e8eda441-d2d9-4708-bb9c-21f7da4e3094	LIVING	26.2	3671D46F-6D69-42DA-9830-24F67EB8B0B6	Alive	FEMALE	TUMOR FREE	NA	4	19	No	WHITE	Primary Tumor
TCGA-AO-A0JI-01	TCGA-AO-A0JI			T1c	M0	-20694		0.249	1172	1011	NA	56		38.5	DiseaseFree	Negative	NOT HISPANIC OR LATINO	Core needle biopsy		2010-12-07	C50.9	YES	330	C50.9	8500/3	NO	0		Post (prior bilateral ovariectomy OR >12 mo since LMP with no prior hysterectomy)	14	No	N1	Stage IIA		TRUE	e17c565c-9857-4df3-a352-903b53093c85	630613d2-682f-4a1a-b1fa-95320fb9a9b7	LIVING	38.5	468411B5-1719-46B4-835D-E469D6AEFF12	Alive	FEMALE	TUMOR FREE	1	0	10	No	WHITE	Primary Tumor
TCGA-AO-A0JJ-01	TCGA-AO-A0JJ			T2	M0	-19758		0.157	1512	1477	NA	54		62	DiseaseFree	Negative	NOT HISPANIC OR LATINO	Core needle biopsy		2010-09-20	C50.9	YES	260	C50.9	8520/3	NO	0		Post (prior bilateral ovariectomy OR >12 mo since LMP with no prior hysterectomy)	18	No	N1a	Stage IIB		TRUE	bef7b135-a727-45e8-850a-cc4cd56c49aa	008dafdd-a3d1-4801-8c0a-8714e2b58e48	LIVING	62	EB9B6625-6674-4665-9BEE-D4DFD9366A02	Alive	FEMALE	TUMOR FREE	NA	2	44	No	WHITE	Primary Tumor
TCGA-AO-A0JL-01	TCGA-AO-A0JL			T2	M0	-21895		0.631	1319	1332	NA	59		55.3	DiseaseFree	Negative	NOT HISPANIC OR LATINO	Core needle biopsy		2010-09-20	C50.9	YES	380	C50.9	8500/3	NO	0		Post (prior bilateral ovariectomy OR >12 mo since LMP with no prior hysterectomy)	54	No	N2a	Stage IIIA		TRUE	d5d8e76e-2f2a-49bc-ba0a-d51283611b16	834d2e25-da72-413b-bb0e-3beb24d46472	LIVING	55.3	C2976F78-89AF-4461-8D22-BFEBC0504722	Alive	FEMALE	TUMOR FREE	NA	7	26	No	WHITE	Primary Tumor
TCGA-AO-A0JM-01	TCGA-AO-A0JM			T2	M0	-14653		0.331	1826	1828	NA	40		71.8	DiseaseFree	Negative	HISPANIC OR LATINO	Core needle biopsy		2010-09-20	C50.9	YES	710	C50.9	8500/3	NO	0		Pre (<6 months since LMP AND no prior bilateral ovariectomy AND not on estrogen replacement)	32	No	N1	Stage IIB		TRUE	44bec761-b603-49c0-8634-f6bfe0319bb1	7ec2c455-d90f-4cd5-9bbb-aedbf21eca00	LIVING	71.8	3023C34B-CF59-43EA-9241-33B738D19B05	Alive	FEMALE	TUMOR FREE	NA	2	23	No		Primary Tumor
TCGA-AO-A124-01	TCGA-AO-A124		5th	T2	M0	-14174		0.733	3120	3213	NA	38		103	DiseaseFree	Negative	NOT HISPANIC OR LATINO	Core needle biopsy		2010-12-07	C50.9	YES	730	C50.9	8523/3	NO	0		Pre (<6 months since LMP AND no prior bilateral ovariectomy AND not on estrogen replacement)	123	No	N0 (i-)	Stage IIA		TRUE	b094e8b2-8ece-4b36-8025-18073a8b873c	2f4d3cea-30c8-4cf0-a610-33b3e20241e8	LIVING	103	9009B4A7-3570-4AD6-878E-90CE8DA7980A	Alive	FEMALE	TUMOR FREE	0	0	18	No	WHITE	Primary Tumor
TCGA-AO-A125-01	TCGA-AO-A125		5th	T2	M0	-26466		0.115	3019	3193	NA	72		99.2	DiseaseFree	Negative	NOT HISPANIC OR LATINO	Core needle biopsy		2010-12-07	C50.9	YES	90	C50.9	8050/3	NO	0		Post (prior bilateral ovariectomy OR >12 mo since LMP with no prior hysterectomy)	33	No	N0 (i-)	Stage IIA		TRUE	8577ffcb-242e-40e2-98d4-2831d952be34	2fb2f7f4-2435-4ac0-a405-a342e15ef7cd	LIVING	99.2	AE348902-0573-4A57-BBD6-037FA2AF1872	Alive	FEMALE	TUMOR FREE	0	0	5	No	BLACK OR AFRICAN AMERICAN	Primary Tumor
TCGA-AO-A126-01	TCGA-AO-A126			T2	M0	-14264		0.154	2850	3033	NA	39		8.77	Recurred/Progressed	Negative	NOT HISPANIC OR LATINO	Core needle biopsy		2010-12-07	C50.9	YES	450	C50.9	8500/3	NO	0		Pre (<6 months since LMP AND no prior bilateral ovariectomy AND not on estrogen replacement)	19	No	N0 (i-)	Stage IIA		TRUE	cc0902fd-a2fc-4327-929e-d4219e32e1d7	7a1381f5-7106-4618-884b-7e269f003e19	LIVING	93.6	A4BFA94D-166F-43D4-90B5-3C547F4026A0	Alive	FEMALE	TUMOR FREE	0	0	5	No	ASIAN	Primary Tumor
TCGA-AO-A128-01	TCGA-AO-A128			T2	M0	-22340		0.155	2877	2960	NA	61		94.5	DiseaseFree	Negative	NOT HISPANIC OR LATINO	Fine needle aspiration biopsy		2010-12-07	C50.9	YES	590	C50.9	8500/3	NO	0		Post (prior bilateral ovariectomy OR >12 mo since LMP with no prior hysterectomy)	851	No	N0 (i-)	Stage IIA		TRUE	016caf42-4e19-4444-ab5d-6cf1e76c4afa	163000c7-0633-4d89-a84f-f487517248db	LIVING	94.5	03526CFD-0C3E-4ACB-AB26-3E0B0ED0ADA2	Alive	FEMALE	TUMOR FREE	0	0	15	No	WHITE	Primary Tumor
TCGA-AO-A129-01	TCGA-AO-A129		5th	T2	M0	-10898		0.399	2923	2915	NA	29		96	DiseaseFree	Negative	NOT HISPANIC OR LATINO	Core needle biopsy		2010-12-08	C50.9	YES	320	C50.9	8500/3	NO	0		Pre (<6 months since LMP AND no prior bilateral ovariectomy AND not on estrogen replacement)	83	No	N1a	Stage IIB		TRUE	c70ee5e1-4703-4996-bb5c-f4cca0fb53ba	fe3921db-1691-432f-b7fa-703ae8d7bfd2	LIVING	96	DD973A0E-3CC3-4ED7-BE2C-7E5E3C55032B	Alive	FEMALE	TUMOR FREE	NA	2	21	No	WHITE	Primary Tumor
TCGA-AO-A12A-01	TCGA-AO-A12A		6th	T2	M0	-17420		0.137	2755	2793	NA	47		90.5	DiseaseFree	Close	NOT HISPANIC OR LATINO	Core needle biopsy		2010-12-08	C50.9	YES	220	C50.9	8500/3	NO	0		Pre (<6 months since LMP AND no prior bilateral ovariectomy AND not on estrogen replacement)	16	No	N0 (i+)	Stage IIA		TRUE	99927651-34be-4795-893a-128d8a1fdb30	e35fcfbe-0550-4a39-9996-5d178e3f40ef	LIVING	90.5	A54E82A4-D7C2-4A5C-A69C-C66976F0282F	Alive	FEMALE	TUMOR FREE	1	0	27	No	WHITE	Primary Tumor
TCGA-AO-A12B-01	TCGA-AO-A12B		6th	T2	M0	-23150		0.112	2359	2365	NA	63		77.5	DiseaseFree	Negative	HISPANIC OR LATINO	Core needle biopsy		2010-12-08	C50.9	YES	570	C50.9	8500/3	NO	0		Post (prior bilateral ovariectomy OR >12 mo since LMP with no prior hysterectomy)	17	No	N0 (i-)	Stage IIA		TRUE	f6ed684f-ee7a-496c-80d5-6eacd494d16a	cac72f1c-d337-4e20-8ba0-e48126517a66	LIVING	77.5	CF071D24-7BA2-43BE-B3E7-A981DBDFCA0F	Alive	FEMALE	TUMOR FREE	0	0	2	No	WHITE	Primary Tumor
TCGA-AO-A12D-01	TCGA-AO-A12D		6th	T1c	M0	-15774		0.325	1948	1948	NA	43		64	DiseaseFree	Negative	NOT HISPANIC OR LATINO	Core needle biopsy		2010-12-08	C50.9	YES	750	C50.9	8500/3	NO	0		Pre (<6 months since LMP AND no prior bilateral ovariectomy AND not on estrogen replacement)	41	No	N1a	Stage IIA		TRUE	2fe854b4-bac9-4801-9a1c-ee99388e8082	b6359ede-df10-44b9-a2e2-bbf900eeb241	LIVING	64	9363D53D-BC3B-4AC0-8185-536C6DB3A6AE	Alive	FEMALE	TUMOR FREE	0	1	16	No	WHITE	Primary Tumor
TCGA-AO-A12E-01	TCGA-AO-A12E		6th	T3	M0	-18721		0.401	1743	1822	NA	51		57.3	DiseaseFree	Negative	NOT HISPANIC OR LATINO	Core needle biopsy		2010-12-08	C50.9	YES	630	C50.9	8520/3	NO	0		Pre (<6 months since LMP AND no prior bilateral ovariectomy AND not on estrogen replacement)	382	No	N0 (i+)	Stage IIB		TRUE	2cbeadff-a8a3-4787-9d4e-f6b74c3ab5d9	a869827a-f639-4cbf-8efb-1a5f00ed2d0a	LIVING	57.3	332675C9-53CB-4244-8480-82E1546DA7F2	Alive	FEMALE	TUMOR FREE	1	0	13	No	WHITE	Primary Tumor
TCGA-AO-A12F-01	TCGA-AO-A12F		6th	T2	M0	-13409		0.621	1471	1578	NA	36		48.3	DiseaseFree	Negative	NOT HISPANIC OR LATINO	Core needle biopsy		2010-12-08	C50.9	YES	600	C50.9	8500/3	NO	0		Pre (<6 months since LMP AND no prior bilateral ovariectomy AND not on estrogen replacement)	30	No	N0 (i-)	Stage IIA		TRUE	495f9eda-b9be-4eef-bae1-766a4bfbd68e	8fc813ab-c217-4fae-9189-be0a2b7e0360	LIVING	48.3	96B43BA2-7099-436C-8AFD-FD53E55E7F51	Alive	FEMALE	TUMOR FREE	0	0	17	No	WHITE	Primary Tumor
TCGA-AO-A12G-01	TCGA-AO-A12G		6th	T2	M0	-27705		0.274	1266	1415	NA	75		41.6	DiseaseFree	Negative	NOT HISPANIC OR LATINO	Core needle biopsy		2010-12-08	C50.9	YES	280	C50.9	8022/3	NO	0		Post (prior bilateral ovariectomy OR >12 mo since LMP with no prior hysterectomy)	34	No	N0 (i+)	Stage IIA		TRUE	58c56d4b-3f85-4aad-a779-5f9e1791677d	9f48e197-0bfb-430e-a874-d14178485367	LIVING	41.6	6CE21603-4200-40BA-94AA-15F24EE4AC7F	Alive	FEMALE	TUMOR FREE	1	0	4	No	WHITE	Primary Tumor
TCGA-AO-A12H-01	TCGA-AO-A12H		6th	T2	M0	-25515		2.445e-06	863	1017	NA	69		28.4	DiseaseFree	Negative	NOT HISPANIC OR LATINO	Core needle biopsy		2010-12-08	C50.9	YES	290	C50.9	8523/3	NO	0		Pre (<6 months since LMP AND no prior bilateral ovariectomy AND not on estrogen replacement)	21	No	N0 (i-)	Stage IIA		TRUE	b5b99291-507e-4b68-a039-9a0f571f55df	d8afcb32-81d0-43b3-ad5c-e8c735710624	LIVING	28.4	2FDFCEB5-74F7-417E-9FD1-ECC81B27803B	Alive	FEMALE	TUMOR FREE	0	0	10	No	BLACK OR AFRICAN AMERICAN	Primary Tumor
TCGA-AO-A1KO-01	TCGA-AO-A1KO		6th	T3	M0	-16817		9.433e-06	448	832	NA	46		14.7	DiseaseFree	Negative	NOT HISPANIC OR LATINO	Excisional Biopsy		2011-04-01	C50.9	YES	580	C50.9	8520/3	NO	0	YES	Pre (<6 months since LMP AND no prior bilateral ovariectomy AND not on estrogen replacement)	28	No	N0 (i+)	Stage IIB		TRUE	c25898b4-eb33-42f4-bf3f-bf532a929e7d	f4544809-7b92-40bc-b121-0db70c8af314	LIVING	14.7	15FB8CBD-85EF-45BE-8065-9F4E922D457E	Alive	FEMALE	TUMOR FREE	1	0	19	No	WHITE	Primary Tumor
TCGA-AO-A1KP-01	TCGA-AO-A1KP		6th	T1	M0	-28247		0.182	2513	2604	NA	77		82.6	DiseaseFree	Negative	NOT HISPANIC OR LATINO	Core needle biopsy		2011-04-01	C50.9	YES	360	C50.9	8500/3	NO	0	YES	Post (prior bilateral ovariectomy OR >12 mo since LMP with no prior hysterectomy)	20	No	N1	Stage IIA		TRUE	3aaabc62-f5a4-4025-9b29-5adf82c86c84	b8718131-47af-4eec-b601-12fa3969ca44	LIVING	82.6	467172CC-6EA1-435D-BDC1-D65FBF8EA0E8	Alive	FEMALE	TUMOR FREE	1	0	9	No	WHITE	Primary Tumor
TCGA-AO-A1KQ-01	TCGA-AO-A1KQ		6th	T4	M0	-30859		0.503	1519	1553	NA	84		61.8	DiseaseFree	Negative	NOT HISPANIC OR LATINO	Core needle biopsy		2011-04-01	C50.9	YES	540	C50.9	8500/3	NO	0	YES		NA	No	N1	Stage IIIB		TRUE	d2219a3f-4c55-4dee-9b08-c6f330dd1acf	82df814f-5c83-413f-99f5-153aed79161c	LIVING	61.8	EB5199BA-6164-4CFB-AFAA-B41544B83103	Alive	MALE	TUMOR FREE	0	2	9	No	WHITE	Primary Tumor
TCGA-AO-A1KR-01	TCGA-AO-A1KR		6th	T2	M0	-18900		0.451	2141	1932	NA	51		70.3	DiseaseFree	Negative	NOT HISPANIC OR LATINO	Core needle biopsy		2011-09-15	C50.9	YES	190	C50.9	8500/3	NO	0	YES	Pre (<6 months since LMP AND no prior bilateral ovariectomy AND not on estrogen replacement)	56	No	N0	Stage IIA		TRUE	b7f74ae1-6f58-447c-be50-a7666eb19d9a	00a59c97-91b4-413e-8d9e-674753997221	LIVING	70.3	FF188295-E139-4AEE-8EE8-364536F2BBE8	Alive	FEMALE	TUMOR FREE	0	0	4	No	WHITE	Primary Tumor
TCGA-AO-A1KS-01	TCGA-AO-A1KS		7th	T2	M0	-25230		0.486	16	147	NA	69		0.53	DiseaseFree	Negative	NOT HISPANIC OR LATINO	Core needle biopsy		2011-04-01	C50.9	YES	420	C50.9	8520/3	NO	0	YES	Post (prior bilateral ovariectomy OR >12 mo since LMP with no prior hysterectomy)	34	No	N0 (i-)	Stage IIA		TRUE	bb8d42d3-ad65-4d88-ae1d-f9aadfc7962d	76f4bdbc-58c8-4424-865b-c6531d908dc3	LIVING	0.53	0FB93D92-81F6-4241-9094-4AABF70E6A0F	Alive	FEMALE	TUMOR FREE	0	0	5	No	WHITE	Primary Tumor
TCGA-AO-A1KT-01	TCGA-AO-A1KT		6th	T1	M0	-28660		0.351	541	617	NA	78		17.8	DiseaseFree	Negative	NOT HISPANIC OR LATINO	Core needle biopsy		2011-04-01	C50.9	YES	200	C50.9	8500/3	NO	0	YES	Post (prior bilateral ovariectomy OR >12 mo since LMP with no prior hysterectomy)	33	No	N1	Stage IIA		TRUE	1f8f87cb-8a0b-474c-97fb-c71b4fd88d97	15c2deaa-1162-4ee8-b698-179bfd67a78d	LIVING	17.8	D9432167-0F2E-4377-9DB4-EA4E59A6C9B9	Alive	FEMALE	TUMOR FREE	1	1	5	No	WHITE	Primary Tumor
TCGA-AQ-A04H-01	TCGA-AQ-A04H		6th	T2	MX	-22539		0.42	439	365	NA	61		24.8	DiseaseFree	Negative	NOT HISPANIC OR LATINO	Core needle biopsy		2010-12-15	C50.9	YES	100	C50.9	8500/3	NO	0		Post (prior bilateral ovariectomy OR >12 mo since LMP with no prior hysterectomy)	62	No	N2a	Stage IIIA		FALSE	83f943c7-3975-4b4f-985d-9c057741793b	21438c0b-398e-4fe6-bd2f-cfae83292341	LIVING	24.8	FA851A06-B2C8-4FB9-AFA4-0F0151E38AA8	Alive	FEMALE	TUMOR FREE	NA	4	15	No	WHITE	Primary Tumor
TCGA-AQ-A04J-01	TCGA-AQ-A04J			T2	M0	-16615		0.343	160	118	NA	45		26.9	DiseaseFree	Negative	NOT HISPANIC OR LATINO	Core needle biopsy		2010-10-15	C50.9	YES	160	C50.9	8500/3	NO	0		Pre (<6 months since LMP AND no prior bilateral ovariectomy AND not on estrogen replacement)	51	No	N0 (i+)	Stage IIA		FALSE	9938ce5c-e74e-446e-a932-f096f85cc3b1	09d6f42c-5e9f-4adc-bd8c-e5dca597fc01	LIVING	26.9	71CEC5F6-16E5-46E1-A91B-B5E0F699B231	Alive	FEMALE	TUMOR FREE	0	0	20	No	WHITE	Primary Tumor
TCGA-AQ-A04L-01	TCGA-AQ-A04L		5th	T2	MX	-17759		0.588	3359	3403	NA	48		130	DiseaseFree	Negative	NOT HISPANIC OR LATINO	Fine needle aspiration biopsy		2010-12-15	C50.9	YES	160	C50.9	8500/3	NO	0		Peri (6-12 months since last menstrual period)	33	No	N0 (i-)	Stage IIA		FALSE	78582fbc-dcc7-48ae-9f95-5271c9bc5b72	da0ed50a-e7d6-4a78-8bb6-cfd80f6e2ff6	LIVING	130	ECFA7539-B97D-4E6B-B26D-BEC0466EBE2D	Alive	FEMALE	TUMOR FREE	NA	0	2	No	WHITE	Primary Tumor
TCGA-AQ-A0Y5-01	TCGA-AQ-A0Y5		7th	T2	MX	-25793		0.496	NA	212	172	70		NA		Negative	NOT HISPANIC OR LATINO	Core needle biopsy		2011-04-07	C50.9	YES	160	C50.9	8500/3	NO	0	YES	Post (prior bilateral ovariectomy OR >12 mo since LMP with no prior hysterectomy)	38	Yes	N2a	Stage IIIA		FALSE	d0b78f3f-a198-437a-ab8c-204345d3b75d	f5675b71-ed1b-4fdb-be07-d627dc98ed88	DECEASED	5.65	5BC01981-366E-44EC-A986-087DB7904E5C	Dead	FEMALE	TUMOR FREE	NA	5	17	Yes	WHITE	Primary Tumor
TCGA-AQ-A1H2-01	TCGA-AQ-A1H2		7th	T2	MX	-30958		0.329	230	156	NA	84		15.6	DiseaseFree	Negative	NOT HISPANIC OR LATINO	Core needle biopsy		2011-04-20	C50.9	YES	210	C50.4	8500/3	NO	0	YES	Post (prior bilateral ovariectomy OR >12 mo since LMP with no prior hysterectomy)	25	No	N2a	Stage IIIA		FALSE	4d120899-9a80-4736-b097-285e9e261bcb	26b0cf7a-584f-46e5-8f83-b6b5f7d542ba	LIVING	15.6	1B5FA34B-E3B4-4D4B-AF0A-1C90016CC532	Alive	FEMALE	TUMOR FREE	NA	13	19	No	WHITE	Primary Tumor
TCGA-AQ-A1H3-01	TCGA-AQ-A1H3		7th	T2	MX	-18177		0.204	162	94	NA	49		13.2	DiseaseFree	Negative	NOT HISPANIC OR LATINO	Core needle biopsy		2011-04-20	C50.9	YES	300	C50.4	8500/3	NO	0	YES	Pre (<6 months since LMP AND no prior bilateral ovariectomy AND not on estrogen replacement)	29	No	N3a	Stage IIIC		FALSE	82ec33dd-e783-4c74-9a87-797a699e11df	09191482-34de-4130-afbe-dd47d481d539	LIVING	13.2	6EB1A616-E99C-4AF6-9C0A-0FDC521A79CD	Alive	FEMALE	TUMOR FREE	NA	14	23	No	WHITE	Primary Tumor
TCGA-AR-A0TP-01	TCGA-AR-A0TP			T2	M0	-15812		0.514	2521	2512	NA	43		82.8	DiseaseFree	Negative	NOT HISPANIC OR LATINO	Core needle biopsy		2011-02-25	C50.9	YES	650	C50.9	8500/3	NO	0		Pre (<6 months since LMP AND no prior bilateral ovariectomy AND not on estrogen replacement)	49	No	N0	Stage IIA		TRUE	ab89bb2e-da84-4116-a8cd-49aad7bbfd4d	2399b5a8-f089-4a62-b75a-e6c0bd909846	LIVING	82.8	E1A92F92-1DD2-4E33-9C16-3FD0371D1431	Alive	FEMALE		0	0	5	No	WHITE	Primary Tumor
TCGA-AR-A0TQ-01	TCGA-AR-A0TQ			T3	M0	-9873		0.128	1500	1512	NA	27		49.3	DiseaseFree	Negative	NOT HISPANIC OR LATINO	Core needle biopsy		2011-03-07	C50.9	YES	750	C50.9	8500/3	NO	0		Pre (<6 months since LMP AND no prior bilateral ovariectomy AND not on estrogen replacement)	18	No	N1	Stage IIIA		TRUE	5dc1bee9-c44d-4fdc-9ae5-83426c4d6880	e8ff6081-cb82-4316-8c22-1c1cb1b6552b	LIVING	49.3	6061FCA5-A113-4985-905D-E17020F6933E	Alive	FEMALE		NA	2	15	No	WHITE	Primary Tumor
TCGA-AR-A0TR-01	TCGA-AR-A0TR			T2	M0	-25190		0.602	NA	1535	160	68		NA		Negative	NOT HISPANIC OR LATINO	Other method, specify:	Biopsy not specified	2011-03-08	C50.9	YES	520	C50.9	8500/3	NO	0		Post (prior bilateral ovariectomy OR >12 mo since LMP with no prior hysterectomy)	28	No	N1	Stage IIB		TRUE	d1703dbd-5c93-4cf2-a4d1-0d90640882bd	ef0d266d-d3a7-4f80-91ae-7e275dd2f0df	DECEASED	5.26	6535D911-D718-4794-9D5E-6E06553464FF	Dead	FEMALE		NA	1	27	No	WHITE	Primary Tumor
TCGA-AR-A0TS-01	TCGA-AR-A0TS			T2	M0	-17141		0.0895	1138	1549	NA	46		37.4	DiseaseFree	Negative	NOT HISPANIC OR LATINO	Core needle biopsy		2011-03-08	C50.9	YES	250	C50.9	8500/3	NO	0		Pre (<6 months since LMP AND no prior bilateral ovariectomy AND not on estrogen replacement)	48	No	N1	Stage IIB		TRUE	972447aa-4332-47e7-bddd-2eb699dbb664	2ca5fbc4-80ab-42ff-b277-36f4217ee38a	LIVING	37.4	39A0AD32-D372-422F-94F2-173F963C7AAB	Alive	FEMALE		NA	2	16	No	WHITE	Primary Tumor
TCGA-AR-A0TT-01	TCGA-AR-A0TT			T2	M0	-19679		0.387	1730	1567	NA	53		56.8	DiseaseFree	Negative		Core needle biopsy		2011-03-08	C50.9	YES	310	C50.9	8500/3	NO	0		Pre (<6 months since LMP AND no prior bilateral ovariectomy AND not on estrogen replacement)	39	No	N2	Stage IIIA		TRUE	13ca97a1-75bb-4a49-b8c3-181e5b2c9e86	8b5c92b7-52d5-4859-926f-f1264e9c1650	LIVING	56.8	E9231B33-E1CE-4396-9F9E-03DBF049919A	Alive	FEMALE		NA	5	19	No	BLACK OR AFRICAN AMERICAN	Primary Tumor
TCGA-AR-A0TV-01	TCGA-AR-A0TV			T2	M0	-24279		0.386	905	1716	NA	66		29.7	DiseaseFree	Negative		Core needle biopsy		2011-03-10	C50.9	YES	550	C50.9	8500/3	NO	0		Post (prior bilateral ovariectomy OR >12 mo since LMP with no prior hysterectomy)	50	No	N0	Stage IIA		TRUE	6439621e-da61-4723-91cc-c5d87d0a4abc	a6cd09dc-ac7c-4bdc-9bb4-14f8cce6642d	LIVING	29.7	7594A7F8-1806-4B74-99EF-4E4C889E7BEA	Alive	FEMALE		NA	0	3	No		Primary Tumor
TCGA-AR-A0TW-01	TCGA-AR-A0TW			T3	M0	-18263		0.485	739	1888	NA	50		24.3	DiseaseFree	Negative	NOT HISPANIC OR LATINO	Core needle biopsy		2011-03-10	C50.9	YES	760	C50.9	8500/3	NO	0		Pre (<6 months since LMP AND no prior bilateral ovariectomy AND not on estrogen replacement)	40	No	N1	Stage IIIA		TRUE	8da3d6cf-381b-4d1b-93fa-41fd9d2b2e66	45319218-5bae-486a-a4aa-580ff5f0e931	LIVING	24.3	F832C787-3668-475F-8F67-6342DA3777F4	Alive	FEMALE		NA	3	27	No	WHITE	Primary Tumor
TCGA-AR-A0TX-01	TCGA-AR-A0TX			T1	M0	-23653		0.224	1972	1976	NA	64		64.8	DiseaseFree	Negative		Core needle biopsy		2011-03-10	C50.9	YES	470	C50.9	8500/3	NO	0		Post (prior bilateral ovariectomy OR >12 mo since LMP with no prior hysterectomy)	257	No	N1	Stage IIA		TRUE	c364e81c-eb1e-4870-ab37-9c661f5f2e3d	d5adaf35-04b1-4198-b308-f4720b3d6417	LIVING	64.8	4FC34715-9004-4F53-B914-F0004AEA88C8	Alive	FEMALE		NA	3	25	No		Primary Tumor
TCGA-AR-A0TY-01	TCGA-AR-A0TY			T2	M0	-19836		0.361	NA	2141	1699	54		NA		Negative	NOT HISPANIC OR LATINO	Core needle biopsy		2011-03-10	C50.9	YES	410	C50.9	8500/3	NO	0		Post (prior bilateral ovariectomy OR >12 mo since LMP with no prior hysterectomy)	109	No	N0	Stage IIA		TRUE	da1c58a7-c6bd-47d9-95c2-8d2ac70e20e4	2147c985-f4f4-441a-9142-9b76e6131435	DECEASED	55.8	12A4A731-1ADF-4D36-88F3-16C9642484F3	Dead	FEMALE		NA	0	15	No	WHITE	Primary Tumor
TCGA-AR-A0TZ-01	TCGA-AR-A0TZ			T2	M0	-15720		0.819	2316	2239	NA	43		76.1	DiseaseFree	Negative	NOT HISPANIC OR LATINO	Core needle biopsy		2011-03-07	C50.9	YES	290	C50.9	8500/3	NO	0		Pre (<6 months since LMP AND no prior bilateral ovariectomy AND not on estrogen replacement)	43	No	N2	Stage IIIA		TRUE	c7c34fd9-3021-45b7-b6ff-30b4196585a8	83b570a5-08c5-4f5e-9fb3-47d1d33e8f7b	LIVING	76.1	48F86416-8304-479E-B477-7C37A2F951A2	Alive	FEMALE		NA	6	30	No	WHITE	Primary Tumor
TCGA-AR-A0U0-01	TCGA-AR-A0U0			T2	M0	-26993		0.488	1988	2289	NA	73		65.3	DiseaseFree	Negative		Core needle biopsy		2011-03-07	C50.9	YES	370	C50.9	8500/3	NO	0		Post (prior bilateral ovariectomy OR >12 mo since LMP with no prior hysterectomy)	49	No	N1	Stage IIB		TRUE	e3c336f5-c32f-4c5d-81fb-e2408ae145b2	193a40b4-4410-408c-92d6-486472c1e6fb	LIVING	65.3	322BB8BB-100F-4838-9771-EAEE5A3B817A	Alive	FEMALE		2	0	4	No	WHITE	Primary Tumor
TCGA-AR-A0U2-01	TCGA-AR-A0U2			T2	M0	-17390		0.662	NA	2395	2551	47		NA		Negative	NOT HISPANIC OR LATINO	Incisional Biopsy		2011-02-24	C50.9	YES	150	C50.9	8500/3	NO	0		Pre (<6 months since LMP AND no prior bilateral ovariectomy AND not on estrogen replacement)	52	No	N2	Stage IIIA		TRUE	9ad603dc-3fd0-44f5-ae4e-64eeb1ae8d6d	7c8b0e74-bd47-4c5c-99de-8484eca2b1ad	DECEASED	83.8	51F69645-9564-4257-A86E-3A574C27034F	Dead	FEMALE	WITH TUMOR	0	4	16	No	WHITE	Primary Tumor
TCGA-AR-A0U3-01	TCGA-AR-A0U3			T2	M0	-21755		0.508	2317	2413	NA	59		76.1	DiseaseFree	Negative	HISPANIC OR LATINO	Core needle biopsy		2011-02-25	C50.9	YES	270	C50.9	8500/3	NO	0		Post (prior bilateral ovariectomy OR >12 mo since LMP with no prior hysterectomy)	29	No	N1	Stage IIB		TRUE	c5f00132-1c6b-4337-af6f-596c652665cc	a439dcc3-4377-449d-983e-f34f8e5741e3	LIVING	76.1	ED2D1BA8-8FEB-43E1-9174-91F9D59565F9	Alive	FEMALE		NA	1	4	No	WHITE	Primary Tumor
TCGA-AR-A0U4-01	TCGA-AR-A0U4			T2	M0	-19729		0.445	1684	1517	NA	54		55.3	DiseaseFree	Negative	NOT HISPANIC OR LATINO	Core needle biopsy		2011-03-10	C50.9	YES	530	C50.9	8500/3	NO	0		Pre (<6 months since LMP AND no prior bilateral ovariectomy AND not on estrogen replacement)	NA	No	N0	Stage IIA		TRUE	71f97b63-c970-44ee-98c2-e02e663d5a40	02f948c1-bcce-4a51-a6c1-4120a67fa544	LIVING	55.3	6424BA69-DA2B-4CCD-ADDF-DB1BEDA11EBF	Alive	FEMALE		NA	0	10	No	WHITE	Primary Tumor
TCGA-AR-A1AH-01	TCGA-AR-A1AH		6th	T2	M0	-18991		0.903	2298	2368	NA	51		37.3	Recurred/Progressed	Negative	NOT HISPANIC OR LATINO	Core needle biopsy		2011-06-13	C50.9	YES	140	C50.9	8500/3	NO	0	YES	Post (prior bilateral ovariectomy OR >12 mo since LMP with no prior hysterectomy)	70	No	N1	Stage IIB		TRUE	a6e11b30-3ae8-4dd1-b04c-a730c6a79746	65ce036f-a8ed-4e83-818c-b54c95529a2e	LIVING	75.5	75F29A17-B6AF-43B9-BE12-3ABF850F23BA	Alive	FEMALE	TUMOR FREE	NA	1	9	No	WHITE	Primary Tumor
TCGA-AR-A1AI-01	TCGA-AR-A1AI		6th	T2	M0	-17229		0.468	1881	1939	NA	47		19.3	Recurred/Progressed	Negative	NOT HISPANIC OR LATINO	Fine needle aspiration biopsy		2011-06-15	C50.9	YES	1050	C50.4	8510/3	NO	0	YES	Post (prior bilateral ovariectomy OR >12 mo since LMP with no prior hysterectomy)	71	No	N0	Stage IIA		TRUE	9848307d-1bd5-40c1-b655-a33297aaf74f	2e78b083-64df-4f0e-95ae-783209aee124	LIVING	61.8	F5CAE962-5347-46FA-86EE-169121BED547	Alive	FEMALE	TUMOR FREE	NA	0	5	No	WHITE	Primary Tumor
TCGA-AR-A1AJ-01	TCGA-AR-A1AJ		6th	T1	M0	-30489		0.0657	1605	1828	NA	83		52.7	DiseaseFree	Negative	NOT HISPANIC OR LATINO	Core needle biopsy		2011-06-13	C50.9	YES	280	C50.9	8500/3	NO	0	YES	Post (prior bilateral ovariectomy OR >12 mo since LMP with no prior hysterectomy)	25	No	N0	Stage I		TRUE	23e7a78a-1d56-4ad1-9bb4-72ec0178aff2	17bb7144-07ec-49d0-8345-2a5b4ceeeaec	LIVING	52.7	0DEAC35F-8B73-4A9F-B7FA-2F501B736B0E	Alive	FEMALE	TUMOR FREE	NA	0	8	No	WHITE	Primary Tumor
TCGA-AR-A1AK-01	TCGA-AR-A1AK		6th	T1	M0	-25825		0.294	1559	1744	NA	70		51.2	DiseaseFree	Negative	NOT HISPANIC OR LATINO	Core needle biopsy		2011-06-15	C50.9	YES	490	C50.9	8520/3	NO	0	YES	Post (prior bilateral ovariectomy OR >12 mo since LMP with no prior hysterectomy)	56	No	N0	Stage I		TRUE	94b03e1d-50ec-4680-bffd-7086d1536ff2	fe0ddcfc-f6e9-460d-b8e6-5187ffe8eb4f	LIVING	51.2	F4DBFC71-9CD0-41C3-9F20-77FA0605D4A8	Alive	FEMALE	TUMOR FREE	NA	0	5	No	WHITE	Primary Tumor
TCGA-AR-A1AL-01	TCGA-AR-A1AL		6th	T3	M0	-22023		0.0817	1485	1528	NA	60		48.8	DiseaseFree	Negative	NOT HISPANIC OR LATINO	Core needle biopsy		2011-06-15	C50.9	YES	630	C50.8	8520/3	NO	0	YES	Post (prior bilateral ovariectomy OR >12 mo since LMP with no prior hysterectomy)	22	No	N1	Stage IIIA		TRUE	1f99e4d4-4e8b-4cc1-a129-227a2a82780e	a7945d1c-35ca-4c95-98c6-ccb6e6d2b39c	LIVING	48.8	E3D44C6B-4497-4212-8CA1-AC9444B4CC54	Alive	FEMALE	TUMOR FREE	NA	3	15	No	WHITE	Primary Tumor
TCGA-AR-A1AN-01	TCGA-AR-A1AN		6th	T2	M0	-16974		0.337	1330	1463	NA	46		43.7	DiseaseFree	Negative	HISPANIC OR LATINO	Core needle biopsy		2011-06-14	C50.9	YES	70	C50.9	8500/3	NO	0	YES	Pre (<6 months since LMP AND no prior bilateral ovariectomy AND not on estrogen replacement)	18	No	N0	Stage IIA		TRUE	43029932-feb0-4658-97fa-645c1e775009	2dd17e3a-3034-4bb9-8a79-d0c89fa9ae21	LIVING	43.7	DA251274-7966-4F48-A02F-393ABBDAB4E9	Alive	FEMALE	TUMOR FREE	NA	0	5	No	WHITE	Primary Tumor
TCGA-AR-A1AO-01	TCGA-AR-A1AO		6th	T1	M0	-17332		0.0001825	1325	1471	NA	47		43.5	DiseaseFree	Negative	NOT HISPANIC OR LATINO	Core needle biopsy		2011-06-13	C50.9	YES	200	C50.9	8500/3	NO	0	YES	Pre (<6 months since LMP AND no prior bilateral ovariectomy AND not on estrogen replacement)	22	No	N1	Stage IIA		TRUE	623befd6-0ca4-4a6c-9cf5-d9385c3b718f	5cedca81-7593-48c9-8bed-ebd294347ce7	LIVING	43.5	37EF1828-0A53-4358-97C7-A7849EC653AF	Alive	FEMALE	TUMOR FREE	NA	2	39	No	WHITE	Primary Tumor
TCGA-AR-A1AP-01	TCGA-AR-A1AP		6th	T1	M0	-29406		0.288	1216	1450	NA	80		40	DiseaseFree	Positive	NOT HISPANIC OR LATINO	Core needle biopsy		2011-06-13	C50.9	YES	310	C50.9	8500/3	NO	0	YES	Post (prior bilateral ovariectomy OR >12 mo since LMP with no prior hysterectomy)	36	No	N0	Stage I		TRUE	9495f029-9882-4c9b-a557-b3aec9e91698	550f24b0-a925-41d6-be27-96c827693611	LIVING	40	0BFF09DE-6F36-4F68-AC13-8BC16AA0DCBE	Alive	FEMALE	TUMOR FREE	NA	0	1	No	WHITE	Primary Tumor
TCGA-AR-A1AQ-01	TCGA-AR-A1AQ		6th	T2	M0	-18109		0.498	1310	1424	NA	49		43	DiseaseFree	Negative	NOT HISPANIC OR LATINO	Core needle biopsy		2011-06-14	C50.9	YES	180	C50.9	8500/3	NO	0	YES	Post (prior bilateral ovariectomy OR >12 mo since LMP with no prior hysterectomy)	35	No	N0	Stage IIA		TRUE	98e0b4de-52fc-4945-9bf5-11e29368f939	3c111956-7bcf-46a7-b64f-708ce11b9ff8	LIVING	43	FC236604-AAE5-4394-9D39-270FFEFB635A	Alive	FEMALE	TUMOR FREE	NA	0	6	No	WHITE	Primary Tumor
TCGA-AR-A1AR-01	TCGA-AR-A1AR		6th	T1	M0	-18482		0.47	NA	1416	524	50		12.7	Recurred/Progressed	Negative	NOT HISPANIC OR LATINO	Core needle biopsy		2011-06-28	C50.9	YES	250	C50.9	8500/3	NO	0		Post (prior bilateral ovariectomy OR >12 mo since LMP with no prior hysterectomy)	48	No	N2	Stage IIIA		TRUE	eda6d2d5-4199-4f76-a45b-1d0401b4e54c	5fa9998b-deff-493e-8a8e-dc2422192a48	DECEASED	17.2	747FB91B-F523-4FA0-91DD-6014EF55643D	Dead	FEMALE	TUMOR FREE	NA	5	14	Yes	WHITE	Primary Tumor
TCGA-AR-A1AS-01	TCGA-AR-A1AS		6th	T2	M0	-20028		0.138	1242	1331	NA	54		40.8	DiseaseFree	Negative		Core needle biopsy		2011-06-14	C50.9	YES	300	C50.9	8500/3	NO	0	YES	Post (prior bilateral ovariectomy OR >12 mo since LMP with no prior hysterectomy)	32	No	N1	Stage IIB		TRUE	7d681cc6-689d-41c8-9e84-e13733089ec9	f6cc81c4-e7b6-462c-a97a-27c1ef62b958	LIVING	40.8	180AA688-0B63-4DD9-BA29-708E80FBC4C9	Alive	FEMALE		NA	1	17	No	ASIAN	Primary Tumor
TCGA-AR-A1AU-01	TCGA-AR-A1AU		6th	T2	M0	-14564		0.216	1409	1317	NA	39		46.3	DiseaseFree	Negative	NOT HISPANIC OR LATINO	Core needle biopsy		2011-06-14	C50.9	YES	260	C50.9	8500/3	NO	0	YES	Pre (<6 months since LMP AND no prior bilateral ovariectomy AND not on estrogen replacement)	20	No	N2	Stage IIIA		TRUE	36220587-1c1c-4f92-b177-3b2155e7e273	cd002b40-3caf-429b-934f-64f4ada1731d	LIVING	46.3	5654FC27-47D3-4C7F-A0E7-A5B6140991C2	Alive	FEMALE		NA	4	37	No	WHITE	Primary Tumor
TCGA-AR-A1AV-01	TCGA-AR-A1AV		6th	T2	M0	-24875		0.189	1295	1233	NA	68		42.5	DiseaseFree	Negative	HISPANIC OR LATINO	Core needle biopsy		2011-06-14	C50.9	YES	420	C50.9	8500/3	NO	0	YES		39	No	N1	Stage IIB		TRUE	daf62b56-6dd2-4ab7-adaa-f296bb86a0a5	bcb6b37b-62f7-40a9-bdb9-1b6479610dd6	LIVING	42.5	5AD5B38F-5CC1-4A2F-96E6-F344D8FE0149	Alive	MALE		NA	1	25	No	WHITE	Primary Tumor
TCGA-AR-A1AW-01	TCGA-AR-A1AW		6th	T2	M0	-23855		0.121	1072	1157	NA	65		35.2	DiseaseFree	Negative	NOT HISPANIC OR LATINO	Incisional Biopsy		2011-06-14	C50.9	YES	800	C50.2	8500/3	NO	0	YES	Post (prior bilateral ovariectomy OR >12 mo since LMP with no prior hysterectomy)	23	No	N0	Stage IIA		TRUE	a12fd22a-7f84-4b6e-b6d8-012e38eb73d7	7cfe5395-8477-405a-8260-b3b3aaf46a42	LIVING	35.2	BB485405-199C-48C7-96D7-8C315DEA66B4	Alive	FEMALE		NA	0	1	No	WHITE	Primary Tumor
TCGA-AR-A1AX-01	TCGA-AR-A1AX		6th	T1	M0	-23507		0.0366	1103	1140	NA	64		36.2	DiseaseFree	Negative	NOT HISPANIC OR LATINO	Core needle biopsy		2011-06-14	C50.9	YES	340	C50.9	8500/3	NO	0	YES	Post (prior bilateral ovariectomy OR >12 mo since LMP with no prior hysterectomy)	17	No	N0	Stage I		TRUE	f72c1d69-da35-459f-8542-59bfd6c09c23	f3ac7557-714a-492c-a166-246ef7298952	LIVING	36.2	4FDBA110-6E14-428C-BF82-168AE28A14E4	Alive	FEMALE		NA	0	8	No	WHITE	Primary Tumor
TCGA-AR-A1AY-01	TCGA-AR-A1AY		6th	T1	M0	-23927		0.51	615	1085	NA	65		20.2	DiseaseFree	Negative	NOT HISPANIC OR LATINO	Core needle biopsy		2011-06-14	C50.9	YES	110	C50.9	8500/3	NO	0	YES	Post (prior bilateral ovariectomy OR >12 mo since LMP with no prior hysterectomy)	49	No	N0	Stage I		TRUE	5fd9552a-c742-4388-940d-295d1107ae00	81fc993e-8f5a-4b3b-bea3-4c4c2f5e4ef2	LIVING	20.2	01D97550-C616-4001-85A5-5502D35FA38E	Alive	FEMALE		NA	1	4	No	WHITE	Primary Tumor
TCGA-AR-A24H-01	TCGA-AR-A24H		5th	T2	M0	-24046		0.458	3333	3641	NA	65		109	DiseaseFree	Negative	NOT HISPANIC OR LATINO	Core needle biopsy		2011-08-29	C50.9	YES	40	C50.9	8520/3	NO	0	YES	Post (prior bilateral ovariectomy OR >12 mo since LMP with no prior hysterectomy)	117	No	N0	Stage IIA		TRUE	6f89509c-f802-482e-b4da-94553aa76fe9	c7f97f19-47ae-48d3-a90a-0162d3975747	LIVING	109	C373F2EE-C601-4E17-8E2D-D9BC6AC0301A	Alive	FEMALE		NA	0	4	No	WHITE	Primary Tumor
TCGA-AR-A24K-01	TCGA-AR-A24K		6th	T2	M0	-16961	No value Given	0.201	1548	2325	NA	46		50.9	DiseaseFree	Negative		Core needle biopsy		2011-08-12	C50.9	YES	200	C50.9	8500/3	NO	0	YES	Pre (<6 months since LMP AND no prior bilateral ovariectomy AND not on estrogen replacement)	28	No	N0	Stage IIA		TRUE	599c3701-df7a-4a75-a347-fa9b510dd242	c9ec05fa-5548-4fe3-8c09-a32c9e599d90	LIVING	50.9	BC7B3577-CA6C-41AD-98E2-89D357D29D37	Alive	FEMALE		NA	0	2	No	WHITE	Primary Tumor
TCGA-AR-A24L-01	TCGA-AR-A24L		6th	T2	M0	-9706		0.343	2221	2275	NA	26		73	DiseaseFree	Negative	NOT HISPANIC OR LATINO	Core needle biopsy		2011-08-12	C50.9	YES	1250	C50.9	8500/3	NO	0	YES	Pre (<6 months since LMP AND no prior bilateral ovariectomy AND not on estrogen replacement)	40	No	N1	Stage IIB		TRUE	de646f6a-6d50-4be2-b3cd-f17554b234df	f773ae1d-0ad9-42dd-9675-c8b7287fec85	LIVING	73	BF82AD23-B40E-459F-83EC-590D392664FD	Alive	FEMALE		NA	2	12	No	WHITE	Primary Tumor
TCGA-AR-A24M-01	TCGA-AR-A24M		6th	T2	M0	-14119		0.158	1991	2245	NA	38		65.4	DiseaseFree	Negative	NOT HISPANIC OR LATINO	Core needle biopsy		2011-08-12	C50.9	YES	400	C50.9	8522/3	NO	0	YES	Pre (<6 months since LMP AND no prior bilateral ovariectomy AND not on estrogen replacement)	15	No	N2	Stage IIIA		TRUE	aa30ac3d-4216-45dd-a314-1ae192fafcb2	5754d368-87b9-40e5-9a56-bd48ad9a80e3	LIVING	65.4	56DFBCCE-A9D9-4F08-AC7E-33998F3439B2	Alive	FEMALE		NA	4	28	No	WHITE	Primary Tumor
TCGA-AR-A24N-01	TCGA-AR-A24N		6th	T1	M0	-19989		0.111	2074	2219	NA	54		68.1	DiseaseFree	Negative	NOT HISPANIC OR LATINO	Core needle biopsy		2011-08-16	C50.9	YES	310	C50.9	8500/3	NO	0	YES	Peri (6-12 months since last menstrual period)	33	No	N0	Stage I		TRUE	30047d32-0833-4aca-98d1-3b9ab7122863	dcc31bf1-9890-4fb1-9677-b5fb77e1fc37	LIVING	68.1	AAF32BB7-716A-4C0E-AE7E-04F6A5BF5628	Alive	FEMALE		NA	0	4	No	WHITE	Primary Tumor
TCGA-AR-A24O-01	TCGA-AR-A24O		6th	T3	M0	-15977		0.0332	1998	2213	NA	43		65.6	DiseaseFree	Positive	NOT HISPANIC OR LATINO	Incisional Biopsy		2011-08-16	C50.9	YES	700	C50.9	8522/3	NO	0	YES	Pre (<6 months since LMP AND no prior bilateral ovariectomy AND not on estrogen replacement)	18	No	N2	Stage IIIA		TRUE	125b0a9a-6cbe-4207-9178-e7ff03487e87	146bd11a-e66a-4d8d-990a-9f1199cdf255	LIVING	65.6	887F0E3A-DC70-4CD4-AAAF-3C613195D895	Alive	FEMALE		NA	7	19	No	WHITE	Primary Tumor
TCGA-AR-A24P-01	TCGA-AR-A24P		6th	T1	M0	-17490		0.159	26	2161	NA	47		0.85	DiseaseFree	Negative	NOT HISPANIC OR LATINO	Core needle biopsy		2011-08-16	C50.9	YES	130	C50.9	8500/3	NO	0	YES	Post (prior bilateral ovariectomy OR >12 mo since LMP with no prior hysterectomy)	25	No	N0	Stage I		TRUE	d1fd8ed2-be13-4272-b31e-df86911db3b1	d12bd5fd-838e-491b-8949-6a22f78194ad	LIVING	0.85	0BF7CB67-49F1-42EA-8B41-988BD7E0DE61	Alive	FEMALE		NA	0	3	No	WHITE	Primary Tumor
TCGA-AR-A24Q-01	TCGA-AR-A24Q		6th	T3	M0	-18084		0.664	2009	1932	NA	49		66	DiseaseFree	Negative		Core needle biopsy		2011-08-30	C50.9	YES	590	C50.9	8500/3	NO	0	YES	Post (prior bilateral ovariectomy OR >12 mo since LMP with no prior hysterectomy)	126	No	N0	Stage IIB		TRUE	28e9048a-e540-42de-a1f4-4ef894fccc4c	9ff22b6b-ec23-41f5-a887-a59da1639858	LIVING	66	CCE8E855-2582-4214-B9B1-25F0431065CB	Alive	FEMALE		NA	0	2	No	WHITE	Primary Tumor
TCGA-AR-A24R-01	TCGA-AR-A24R		6th	T1	M0	-16642		0.341	1746	1913	NA	45		57.4	DiseaseFree	Negative	NOT HISPANIC OR LATINO	Core needle biopsy		2011-08-26	C50.9	YES	300	C50.9	8500/3	NO	0	YES	Pre (<6 months since LMP AND no prior bilateral ovariectomy AND not on estrogen replacement)	21	No	N2	Stage IIIA		TRUE	db62d9c7-8343-4771-84fc-146d2e307bb8	7f15f76b-305d-43f7-8d02-34cd0f76340e	LIVING	57.4	C3259BD1-1A2A-40C4-A106-FA2EF0201811	Alive	FEMALE		NA	6	28	No	WHITE	Primary Tumor
TCGA-AR-A24S-01	TCGA-AR-A24S		6th	T1	M0	-22587		0.341	1888	1812	NA	61		62	DiseaseFree	Negative	NOT HISPANIC OR LATINO	Core needle biopsy		2011-08-30	C50.9	YES	520	C50.9	8500/3	NO	0	YES	Post (prior bilateral ovariectomy OR >12 mo since LMP with no prior hysterectomy)	36	No	N0	Stage I		TRUE	074e8b06-3929-4896-9263-3b80ad6a355b	d79df987-e362-43f5-acbd-b19522bace7d	LIVING	62	C0A8A457-8790-4745-BD5D-AFBE55254A1C	Alive	FEMALE		NA	0	4	No	WHITE	Primary Tumor
TCGA-AR-A24T-01	TCGA-AR-A24T		6th	T3	M0	-17135		0.217	1620	1786	NA	46		53.2	DiseaseFree	Negative	NOT HISPANIC OR LATINO	Core needle biopsy		2011-08-30	C50.9	YES	490	C50.9	8520/3	NO	0	YES	Pre (<6 months since LMP AND no prior bilateral ovariectomy AND not on estrogen replacement)	22	No	N3	Stage IIIC		TRUE	9e3de467-fb0d-4021-89f8-b34968a7c7bc	3cf5c205-2a3b-4f17-8e56-2078e88f615c	LIVING	53.2	226031B3-D9C2-4343-B3F7-4E0C36B901E7	Alive	FEMALE		NA	15	17	No	WHITE	Primary Tumor
TCGA-AR-A24U-01	TCGA-AR-A24U		6th	T1	M0	-17523		0.165	1623	1763	NA	47		53.3	DiseaseFree	Positive	NOT HISPANIC OR LATINO	Core needle biopsy		2011-08-26	C50.9	YES	320	C50.9	8500/3	NO	0	YES	Pre (<6 months since LMP AND no prior bilateral ovariectomy AND not on estrogen replacement)	28	No	N1	Stage IIA		TRUE	241fffc8-4250-4cfa-b2e7-e68c33ae07dc	17cdb451-9b35-4aab-8bc2-b4a64ef3e3b4	LIVING	53.3	B481795F-C52C-4FCE-827A-07991C7A7C2E	Alive	FEMALE		NA	2	25	No	WHITE	Primary Tumor
TCGA-AR-A24V-01	TCGA-AR-A24V		6th	T2	M0	-19027		0.267	1648	1720	NA	52		54.1	DiseaseFree	Negative	NOT HISPANIC OR LATINO	Core needle biopsy		2011-08-29	C50.9	YES	400	C50.9	8500/3	NO	0	YES	Peri (6-12 months since last menstrual period)	27	No	N1	Stage IIB		TRUE	3cb06c7a-f2a8-448b-91a8-dd201bbf2ddd	49bfd2cc-fddd-4376-8e53-8008ca075779	LIVING	54.1	468CD293-C9F7-43C6-A40A-18FCDD22F6AA	Alive	FEMALE		NA	1	2	No	WHITE	Primary Tumor
TCGA-AR-A24W-01	TCGA-AR-A24W		6th	T2	M0	-20123		0.102	1550	1720	NA	55		50.9	DiseaseFree	Negative		Core needle biopsy		2011-11-10	C50.9	YES	110	C50.9	8500/3	NO	0	YES	Post (prior bilateral ovariectomy OR >12 mo since LMP with no prior hysterectomy)	8	No	N1	Stage II		TRUE	67526f5a-3a30-45b2-aeab-2b21a855063e	bc641d07-e041-403a-aa3a-e76279a8a1d1	LIVING	50.9	0F2464F7-4108-4700-B2EC-17BC6C432D42	Alive	FEMALE		NA	3	22	No	WHITE	Primary Tumor
TCGA-AR-A24X-01	TCGA-AR-A24X		6th	T2	M0	-19030		0.0713	1465	1717	NA	52		48.1	DiseaseFree	Negative		Core needle biopsy		2011-08-30	C50.9	YES	210	C50.9	8522/3	NO	0	YES	Pre (<6 months since LMP AND no prior bilateral ovariectomy AND not on estrogen replacement)	22	No	N0	Stage IIA		TRUE	491d5ebb-e9ab-4b17-acb8-630ff9fef0f2	a00cc4fb-6852-4869-89a7-f9f2fc941ccc	LIVING	48.1	B537A19C-C7E8-42EB-BA3F-673417F3A9BA	Alive	FEMALE		NA	0	7	No	WHITE	Primary Tumor
TCGA-AR-A24Z-01	TCGA-AR-A24Z		6th	T2	M0	-20900		0.504	1574	1673	NA	57		51.7	DiseaseFree	Negative		Core needle biopsy		2011-08-30	C50.9	YES	120	C50.9	8500/3	NO	0	YES	Post (prior bilateral ovariectomy OR >12 mo since LMP with no prior hysterectomy)	36	No	N0	Stage IIA		TRUE	9fefbe7c-f66a-4940-843e-285cb7b392c1	5cdd3886-898b-4861-a748-d4164ce14a07	LIVING	51.7	AD07F611-0EEA-4890-A02C-6DA3F5F57C45	Alive	FEMALE		NA	0	8	No	WHITE	Primary Tumor
TCGA-AR-A250-01	TCGA-AR-A250		6th	T2	M0	-21309		0.385	1708	1629	NA	58		56.1	DiseaseFree	Positive	NOT HISPANIC OR LATINO	Core needle biopsy		2011-08-30	C50.9	YES	300	C50.9	8500/3	NO	0	YES	Post (prior bilateral ovariectomy OR >12 mo since LMP with no prior hysterectomy)	70	No	N0	Stage IIA		TRUE	a0963e93-b63e-4de2-86c1-81302e271d3e	0d5c5f1c-d20e-480c-a89b-8feba01caf96	LIVING	56.1	16BE833B-E17B-4B8A-9D71-B0D83D73D9DE	Alive	FEMALE		NA	0	4	No	WHITE	Primary Tumor
TCGA-AR-A251-01	TCGA-AR-A251		6th	T2	M0	-18771		0.672	1374	1611	NA	51		45.1	DiseaseFree	Positive	NOT HISPANIC OR LATINO	Core needle biopsy		2011-08-30	C50.9	YES	450	C50.9	8500/3	NO	0	YES	Pre (<6 months since LMP AND no prior bilateral ovariectomy AND not on estrogen replacement)	146	No	N2	Stage IIIA		TRUE	8c51bbcb-7c8d-47ad-9193-70ca157c6900	8cf391f9-d743-408f-8891-2c49db90907c	LIVING	45.1	F5B17108-8904-48E7-9B3D-182F0EA388B7	Alive	FEMALE		NA	4	7	No	WHITE	Primary Tumor
TCGA-AR-A252-01	TCGA-AR-A252		6th	T1	M0	-18611		0.0162	1236	1405	NA	50		40.6	DiseaseFree	Negative	NOT HISPANIC OR LATINO	Core needle biopsy		2011-08-30	C50.9	YES	480	C50.9	8500/3	NO	0	YES	Pre (<6 months since LMP AND no prior bilateral ovariectomy AND not on estrogen replacement)	17	No	N0	Stage I		TRUE	4d0fec97-e024-4608-a0cc-426a3decc7b1	30d31924-b87c-4065-a437-00d6033f2979	LIVING	40.6	8C52C92F-26CA-4E72-BE47-CA2ED1746785	Alive	FEMALE		NA	0	4	No	WHITE	Primary Tumor
TCGA-AR-A254-01	TCGA-AR-A254		6th	T2	M0	-18270		0.237	1212	1381	NA	50		39.8	DiseaseFree	Negative	NOT HISPANIC OR LATINO	Other method, specify:	Wide local incision	2011-08-31	C50.9	YES	990	C50.9	8500/3	NO	0	YES	Pre (<6 months since LMP AND no prior bilateral ovariectomy AND not on estrogen replacement)	28	No	N2	Stage IIIA		TRUE	6014a582-d22e-46e1-9000-c8e2fbad7acf	a92b6d90-f7b4-4b17-b56b-b2fb7103b55f	LIVING	39.8	C026CFCE-1A82-446D-AC78-8CF4788FD9EB	Alive	FEMALE		NA	9	30	No	WHITE	Primary Tumor
TCGA-AR-A255-01	TCGA-AR-A255		6th	T1	M0	-22809		0.657	1059	1225	NA	62		34.8	DiseaseFree	Negative	NOT HISPANIC OR LATINO	Core needle biopsy		2011-08-31	C50.9	YES	250	C50.9	8500/3	NO	0	YES	Post (prior bilateral ovariectomy OR >12 mo since LMP with no prior hysterectomy)	62	No	N0	Stage I		TRUE	e8f3cc64-5e15-4f4d-b73e-5c9b250a664c	f9029956-e7fb-447a-9b6a-ea3dd2acadf4	LIVING	34.8	492DDF00-858B-4420-A43F-4FED2DF61C15	Alive	FEMALE		NA	0	2	No	WHITE	Primary Tumor
TCGA-AR-A256-01	TCGA-AR-A256		5th	T2	M0	-16642		0.683	NA	3740	2854	45		NA		Negative		Fine needle aspiration biopsy		2011-08-31	C50.9	YES	210	C50.9	8500/3	NO	0	YES	Pre (<6 months since LMP AND no prior bilateral ovariectomy AND not on estrogen replacement)	157	No	N0	Stage IIA		TRUE	d3d545b3-457f-4389-821f-704cb24aff7f	87676c70-e2ad-4103-8bc0-3d3c1e40a790	DECEASED	93.8	0FDC2801-71F8-4D45-BFF1-89445E621A41	Dead	FEMALE		NA	0	5	No	WHITE	Primary Tumor
TCGA-AR-A2LE-01	TCGA-AR-A2LE		5th	T1	M0	-25499		0.0725	3913	3755	NA	69		129	DiseaseFree	Negative	NOT HISPANIC OR LATINO	Core needle biopsy		2012-01-12	C50.9	YES	320	C50.9	8520/3	NO	0	YES	Post (prior bilateral ovariectomy OR >12 mo since LMP with no prior hysterectomy)	240	No	N0	Stage I		TRUE	E3FCBF94-D3EF-4A37-AA45-5297F96AF9EB	E53D7A9A-3DB0-4A24-8DC1-6DC80428CD24	LIVING	129	95DC80AB-C070-4613-8C11-A124AEDF9754	Alive	FEMALE		NA	0	2	No	WHITE	Primary Tumor
TCGA-AR-A2LH-01	TCGA-AR-A2LH		6th	T3	M0	-20288		7.77e-07	NA	1661	616	55		NA		Negative	NOT HISPANIC OR LATINO	Core needle biopsy		2012-01-12	C50.9	YES	1100	C50.9	8520/3	NO	0	YES	Post (prior bilateral ovariectomy OR >12 mo since LMP with no prior hysterectomy)	43	No	N3	Stage III		TRUE	376FFE63-EFD7-42AF-90E1-261255B28BB7	22FF97E9-F168-48BB-9B61-6F50ABA08D27	DECEASED	20.2	4E3FDA72-93E1-4961-B1DE-5BFDAC7E947D	Dead	FEMALE		NA	29	39	No	WHITE	Primary Tumor
TCGA-AR-A2LK-01	TCGA-AR-A2LK		6th	T3	M0	-22800		0.656	1304	1340	NA	62		42.8	DiseaseFree	Positive	NOT HISPANIC OR LATINO	Core needle biopsy		2012-01-25	C50.9	YES	650	C50.9	8520/3	NO	0	YES	Post (prior bilateral ovariectomy OR >12 mo since LMP with no prior hysterectomy)	31	No	N2	Stage III		TRUE	1B703058-E596-45BC-80FE-8B98D545C2E2	D6F5C34A-0F5C-4AED-977A-74A1E5D50915	LIVING	42.8	73FFBADB-37C0-4F17-8C95-F8DC94EF1AD3	Alive	FEMALE		NA	5	18	No	WHITE	Primary Tumor
TCGA-AR-A2LL-01	TCGA-AR-A2LL		6th	T3	M0	-25747		0.318	224	1315	NA	70		7.36	DiseaseFree	Negative	NOT HISPANIC OR LATINO	Core needle biopsy		2012-02-14	C50.9	YES	1300	C50.9	8520/3	NO	0	YES	Post (prior bilateral ovariectomy OR >12 mo since LMP with no prior hysterectomy)	29	No	N0	Stage II		TRUE	70FC011C-0F22-4026-9D72-87351126203A	2B62733A-FCBD-46B9-B2BE-9397C563E3BD	LIVING	7.36	B2314041-3E85-4E3F-8924-39FC285B08B2	Alive	FEMALE		NA	0	4	Yes	WHITE	Primary Tumor
TCGA-AR-A2LM-01	TCGA-AR-A2LM		6th	T1	M0	-18053		0.1	1218	1339	NA	49		40	DiseaseFree	Negative	NOT HISPANIC OR LATINO	Core needle biopsy		2012-01-12	C50.9	YES	490	C50.9	8520/3	NO	0	YES	Pre (<6 months since LMP AND no prior bilateral ovariectomy AND not on estrogen replacement)	13	No	N1	Stage II		TRUE	0BF6E772-1AA1-4F54-9A50-C1414E2F22F3	9EBE5223-7566-4026-83AE-812283A8AAEB	LIVING	40	F868DC95-23CA-4DFC-BAA3-FBF5BF6F45A9	Alive	FEMALE		NA	1	3	No	WHITE	Primary Tumor
TCGA-AR-A2LN-01	TCGA-AR-A2LN		7th	T2	M0	-23992		0.0982	520	513	NA	65		17.1	DiseaseFree	Negative	NOT HISPANIC OR LATINO	Core needle biopsy		2012-01-12	C50.9	YES	1460	C50.9	8520/3	NO	0	YES	Post (prior bilateral ovariectomy OR >12 mo since LMP with no prior hysterectomy)	32	No	N0	Stage II		TRUE	A076F135-BE82-40FA-8516-285ED355C965	3F9D6A98-182C-4297-85C5-02CE3B1A3500	LIVING	17.1	128D4F7D-017D-459F-9664-AF509AE4555E	Alive	FEMALE		NA	0	2	No	WHITE	Primary Tumor
TCGA-AR-A2LO-01	TCGA-AR-A2LO		7th	T2	M0	-17080		0.223	633	486	NA	46		20.8	DiseaseFree	Negative	NOT HISPANIC OR LATINO	Core needle biopsy		2012-01-12	C50.9	YES	1650	C50.9	8520/3	NO	0	YES	Pre (<6 months since LMP AND no prior bilateral ovariectomy AND not on estrogen replacement)	12	No	N1	Stage II		TRUE	AD0FA961-C085-4F38-B3DB-5FC0CBF6B64F	A189A276-126A-4357-8AEA-9AC6A791A1C5	LIVING	20.8	E5B6771D-450A-49AD-AEBC-7FC056BFCDBE	Alive	FEMALE		NA	1	16	No	WHITE	Primary Tumor
TCGA-AR-A2LQ-01	TCGA-AR-A2LQ		7th	T3	M0	-21865		7.675e-06	516	449	NA	59		16.9	DiseaseFree	Negative	NOT HISPANIC OR LATINO	Core needle biopsy		2012-01-12	C50.9	YES	1270	C50.9	8520/3	NO	0	YES	Post (prior bilateral ovariectomy OR >12 mo since LMP with no prior hysterectomy)	11	No	N0	Stage II		TRUE	4229E432-6AC5-49D2-B58A-E8713DDB79BD	E4F422A0-1142-4BF2-B848-B681295B370E	LIVING	16.9	C3537961-4636-4BD1-BC89-892580B36E43	Alive	FEMALE		NA	0	3	No	WHITE	Primary Tumor
TCGA-AR-A2LR-01	TCGA-AR-A2LR		7th	T1	M0	-18214		0.491	620	447	NA	49		20.4	DiseaseFree	Negative	NOT HISPANIC OR LATINO	Core needle biopsy		2012-02-14	C50.9	YES	800	C50.9	8575/3	NO	0	YES	Post (prior bilateral ovariectomy OR >12 mo since LMP with no prior hysterectomy)	52	No	N0	Stage I		TRUE	D093173F-08AB-4138-BF3C-399C45A6E163	9F55D4C8-5E41-4FFE-B819-1D8BFD06927B	LIVING	20.4	C310F4EC-D8B1-45C4-8D55-705A9EE35902	Alive	FEMALE		NA	0	4	Yes	WHITE	Primary Tumor
TCGA-B6-A0I1-01	TCGA-B6-A0I1		5th	T2	M0	-26902	image cytometry	0.374	NA	4248	2361	73		NA		Negative	NOT HISPANIC OR LATINO	Incisional Biopsy		2012-01-11	C50.9	YES	100	C50.9	8500/3	NO	0	YES	Post (prior bilateral ovariectomy OR >12 mo since LMP with no prior hysterectomy)	47	No	N0	Stage IIA		TRUE	5DD423E8-FEAA-4568-A750-500948C41D6C	2A5F4696-6E02-4FE9-B66D-8C2AE93B7C2F	DECEASED	77.6	1E498731-FE74-493E-A330-477643800305	Dead	FEMALE	TUMOR FREE	NA	0	7	No	BLACK OR AFRICAN AMERICAN	Primary Tumor
TCGA-B6-A0I2-01	TCGA-B6-A0I2			T1c	M0	-16702		0.854	3827	5305	NA	45		143	DiseaseFree	Negative	NOT HISPANIC OR LATINO	Excisional Biopsy		2010-11-02	C50.9	YES	200	C50.9	8500/3	NO	0		Indeterminate (neither Pre or Postmenopausal)	43	No	N0 (i-)	Stage IA		TRUE	328dfcb0-b5ae-43f2-bc87-dad0ab3df9e7	47436ce0-438f-475b-ac0d-1972d0c5285e	LIVING	143	CA834E5F-30DC-46CF-AF33-AD11226FC09E	Alive	FEMALE	TUMOR FREE	NA	0	8	No	WHITE	Primary Tumor
TCGA-B6-A0I5-01	TCGA-B6-A0I5			T2	M0	-18038		0.245	4550	7820	NA	49		149	DiseaseFree	Negative	NOT HISPANIC OR LATINO	Other method, specify:	biopsy, NOS	2010-11-02	C50.9	YES	50	C50.9	8500/3	NO	0		Indeterminate (neither Pre or Postmenopausal)	20	No	N1b	Stage IIB		TRUE	1a18974d-967c-4727-b42e-12ae7be66589	ca3c9a05-88b7-4d99-abd5-fc557e3929a0	LIVING	149	FA43414D-3757-43CC-8949-77F82DF4FA4D	Alive	FEMALE	TUMOR FREE	NA	5	13	No	WHITE	Primary Tumor
TCGA-B6-A0I9-01	TCGA-B6-A0I9			T3	M1	-22791	IHC	0.495	NA	6694	369	62		NA		Negative	NOT HISPANIC OR LATINO	Other method, specify:	Biopsy, NOS	2010-11-02	C50.9	YES	180	C50.9	8500/3	NO	0		Indeterminate (neither Pre or Postmenopausal)	69	No	NX	Stage IV		TRUE	44954053-0b93-4577-a436-42777e442300	43f2cdb0-e5f0-4586-808a-fc0ef3313aa0	DECEASED	12.1	291884D2-FDFD-4C98-BA19-1A0824ABB68F	Dead	FEMALE	WITH TUMOR	NA	NA	NA	No	WHITE	Primary Tumor
TCGA-B6-A0IA-01	TCGA-B6-A0IA			T2	M0	-18748	IHC	0.239	6719	6664	NA	51		221	DiseaseFree	Negative	NOT HISPANIC OR LATINO	Other method, specify:	Biopsy, NOS	2010-11-02	C50.9	YES	70	C50.9	8523/3	NO	0		Indeterminate (neither Pre or Postmenopausal)	41	No	N0 (i-)	Stage IIA		TRUE	0807435a-e75e-4e04-8e45-ed0cd49a841a	ef8c35b3-bdab-4a7e-b5ab-a0a99f4db803	LIVING	221	55F3F917-E441-4C10-A3E3-0645A4E8374E	Alive	FEMALE	TUMOR FREE	NA	0	15	No	WHITE	Primary Tumor
TCGA-B6-A0IB-01	TCGA-B6-A0IB			T3	M1	-23646	IHC	0.546	NA	6660	3941	64		89.3	Recurred/Progressed	Negative	NOT HISPANIC OR LATINO	Other method, specify:	Biopsy, NOS	2010-11-02	C50.9	YES	150	C50.9	8500/3	NO	0		Indeterminate (neither Pre or Postmenopausal)	60	No	N3	Stage IV		TRUE	157ec9e0-ca6e-4da1-9233-f976cf0db433	e405d22f-86a6-4141-ae74-7098d0fdedfd	DECEASED	129	CFC4801B-04BD-4FFC-911A-7B88E2FA4B49	Dead	FEMALE	WITH TUMOR	NA	8	15	No	WHITE	Primary Tumor
TCGA-B6-A0IC-01	TCGA-B6-A0IC			T2	MX	-32872	IHC	0.0787	NA	6475	1542	90		NA		Negative	NOT HISPANIC OR LATINO	Fine needle aspiration biopsy		2010-11-02	C50.9	YES	100	C50.9	8503/3	NO	0		Post (prior bilateral ovariectomy OR >12 mo since LMP with no prior hysterectomy)	34	No	NX	Stage X		TRUE	b804f7ae-da8f-4414-be11-f880f1859160	81bebbeb-bdb8-43f4-8113-b8f53425b725	DECEASED	50.7	8AABC46F-03C7-4FBF-AC20-2C862E303A8B	Dead	FEMALE		NA	NA	NA	No	WHITE	Primary Tumor
TCGA-B6-A0IE-01	TCGA-B6-A0IE			TX	M0	-13976	Image Analysis	0.349	NA	5563	1999	38		27.6	Recurred/Progressed	Positive	NOT HISPANIC OR LATINO	Other method, specify:	Biopsy, NOS	2010-11-02	C50.9	YES	90	C50.9	8520/3	NO	0		Pre (<6 months since LMP AND no prior bilateral ovariectomy AND not on estrogen replacement)	28	No	N1b	Stage Tis		TRUE	3f834fa7-6d7b-4b85-98c0-5c55d55b6c95	95f2fd0c-9121-47bf-b2c1-dd9ed667a146	DECEASED	65.7	DFCA9C6E-710E-4645-9CFC-A908AAD583F3	Dead	FEMALE	WITH TUMOR	NA	6	24	No	BLACK OR AFRICAN AMERICAN	Primary Tumor
TCGA-B6-A0IG-01	TCGA-B6-A0IG			T2	M0	-18433	Image Analysis	0.317	NA	5836	4456	50		NA		Negative	NOT HISPANIC OR LATINO	Other method, specify:	Biopsy, NOS	2010-11-02	C50.9	YES	200	C50.2	8500/3	NO	0		Indeterminate (neither Pre or Postmenopausal)	41	No	N1b	Stage IIB		TRUE	34ab0cb8-bf19-4cbb-b4eb-3c45ee5aa60b	4c3d691c-fdf7-46e3-977e-68500c4ac358	DECEASED	146	4379DEE0-F7CB-4A73-8828-21EA0AA830F5	Dead	FEMALE	WITH TUMOR	NA	4	16	No	WHITE	Primary Tumor
TCGA-B6-A0IH-01	TCGA-B6-A0IH		6th	T3	M0	-29907	Image Analysis	0.199	NA	5388	3418	81		NA		Positive	NOT HISPANIC OR LATINO	Excisional Biopsy		2011-03-15	C50.9	YES	110	C50.4	8520/3	NO	0	YES	Post (prior bilateral ovariectomy OR >12 mo since LMP with no prior hysterectomy)	28	No	N1b	Stage IIIA		TRUE	2476dda9-da2a-4242-9642-b92b8b9b1c79	5ac66414-2c9e-45d0-837a-f620898a86e0	DECEASED	112	12C64846-1CB3-42E4-B307-54C7AD12F530	Dead	FEMALE		NA	25	27	No	WHITE	Primary Tumor
TCGA-B6-A0IJ-01	TCGA-B6-A0IJ			T3	M0	-15625	Image Analysis	0.598	5383	5350	NA	42		177	DiseaseFree	Negative	NOT HISPANIC OR LATINO	Excisional Biopsy		2010-11-02	C50.9	YES	170	C50.4	8500/3	NO	0		Indeterminate (neither Pre or Postmenopausal)	122	No	N0 (i-)	Stage IIB		TRUE	2c86c3ea-d926-4d39-a5ae-39ece4774287	9ef8142a-8627-4dcf-8c87-15b1bc2bfea2	LIVING	177	F3BAF04C-35EE-450F-BFA8-E9DFE9F984FD	Alive	FEMALE	TUMOR FREE	NA	0	27	No	BLACK OR AFRICAN AMERICAN	Primary Tumor
TCGA-B6-A0IK-01	TCGA-B6-A0IK			T4	M0	-23150	Image Analysis	0.352	NA	5724	571	63		16.1	Recurred/Progressed	Positive	NOT HISPANIC OR LATINO	Other method, specify:	Biopsy, NOS	2010-11-02	C50.9	YES	140	C50.9	8500/3	NO	0		Indeterminate (neither Pre or Postmenopausal)	121	No	N1	Stage IIIB		TRUE	0491063c-14a7-4104-8002-1459126332f3	357e1eca-0f5c-49d6-b437-0ed0afe3b178	DECEASED	18.8	3A38A97C-2CBB-4802-9528-A4BBD62AEA4A	Dead	FEMALE	WITH TUMOR	NA	1	14	No	WHITE	Primary Tumor
TCGA-B6-A0IM-01	TCGA-B6-A0IM			T3	M0	-27557	Image Analysis	0.221	3836	4754	NA	75		126	DiseaseFree	Positive	NOT HISPANIC OR LATINO	Fine needle aspiration biopsy		2010-11-02	C50.9	YES	110	C50.4	8500/3	NO	0		Post (prior bilateral ovariectomy OR >12 mo since LMP with no prior hysterectomy)	40	No	N0 (i-)	Stage IIB		TRUE	5a4b7098-1f6a-49e9-b364-29d6d34f5bd5	74f23f3b-989c-441b-8715-505378d175e3	LIVING	126	4A86A028-C56D-455E-A5CD-47D8A34B5734	Alive	FEMALE	TUMOR FREE	NA	0	9	No	BLACK OR AFRICAN AMERICAN	Primary Tumor
TCGA-B6-A0IN-01	TCGA-B6-A0IN			T1c	MX	-16705	Image Analysis	0.232	NA	5073	2573	45		46.4	Recurred/Progressed	Positive	NOT HISPANIC OR LATINO	Fine needle aspiration biopsy		2010-11-02	C50.9	YES	20	C50.9	8523/3	NO	0		Indeterminate (neither Pre or Postmenopausal)	31	No	NX	Stage X		TRUE	16a8d916-ad46-4690-b1a5-3b2b323f4336	75103265-c66d-4bd9-8ecf-cfcf66402918	DECEASED	84.5	267F1EFD-AB89-4124-B803-00CC0E8E9CD2	Dead	FEMALE	WITH TUMOR	NA	NA	NA	No	WHITE	Primary Tumor
TCGA-B6-A0IO-01	TCGA-B6-A0IO			T2	M0	-24322	Image Analysis	0.327	3350	3278	NA	66		110	DiseaseFree	Negative	NOT HISPANIC OR LATINO	Core needle biopsy		2010-11-02	C50.9	YES	140	C50.4	8500/3	NO	0		Indeterminate (neither Pre or Postmenopausal)	56	No	N0 (i-)	Stage IIA		TRUE	04af44fc-c487-4005-b3cb-cb64815824a2	476b6ab5-f108-4280-9d53-7eb75fe17e4a	LIVING	110	9B3F0B22-8442-4720-A21B-7EF12CBCD2CE	Alive	FEMALE	TUMOR FREE	NA	0	17	No	WHITE	Primary Tumor
TCGA-B6-A0IP-01	TCGA-B6-A0IP			T1c	M0	-27047	IMAGE ANALYSIS	0.0661	3374	4565	NA	74		111	DiseaseFree	Negative	NOT HISPANIC OR LATINO	Fine needle aspiration biopsy		2010-11-02	C50.9	YES	80	C50.9	8520/3	NO	0	YES	Post (prior bilateral ovariectomy OR >12 mo since LMP with no prior hysterectomy)	24	No	N0 (i-)	Stage IA		TRUE	1402082d-25c9-4148-8a1e-f58450b706bb	6b1c8010-d4fe-40e7-8e09-7a7dbdde6616	LIVING	111	6C91D49C-9738-4A4F-A480-E71CD8EE5268	Alive	FEMALE	TUMOR FREE	NA	0	16	No	WHITE	Primary Tumor
TCGA-B6-A0IQ-01	TCGA-B6-A0IQ			T3	M0	-14669	Image Analysis	0.598	3872	5238	NA	40		141	DiseaseFree	Negative	NOT HISPANIC OR LATINO	Other method, specify:	Biopsy, NOS	2010-11-02	C50.9	YES	210	C50.9	8500/3	NO	0		Indeterminate (neither Pre or Postmenopausal)	61	No	N1b	Stage IIIA		TRUE	01eef340-598c-4205-a990-cec190ac2ca5	183a47b2-1b00-4a72-adeb-f35b55692ee1	LIVING	141	0ED7357E-662C-4D65-82ED-29739919068F	Alive	FEMALE	TUMOR FREE	NA	1	26	No	WHITE	Primary Tumor
TCGA-B6-A0RE-01	TCGA-B6-A0RE			TX	M0	-22449	[Unknown]	0.539	6435	7492	NA	61		211	DiseaseFree	Negative	NOT HISPANIC OR LATINO	Other method, specify:	[Unknown]	2010-11-02	C50.9	YES	90	C50.4	8500/3	NO	0		Indeterminate (neither Pre or Postmenopausal)	94	No	N0 (i-)	Stage X		TRUE	08da7c4c-3067-4bcf-9d7a-78566df72e69	270be245-2239-4e96-a917-79cca40868ba	LIVING	211	5607C6CE-21D5-495E-9174-85F1E2E0CB9D	Alive	FEMALE	TUMOR FREE	NA	0	14	No	BLACK OR AFRICAN AMERICAN	Primary Tumor
TCGA-B6-A0RG-01	TCGA-B6-A0RG			T3	M0	-9840	IHC	0.358	2082	6869	NA	26		68.4	DiseaseFree	Negative	NOT HISPANIC OR LATINO	Other method, specify:	Biopsy, NOS	2010-11-02	C50.9	YES	160	C50.2	8500/3	NO	0		Indeterminate (neither Pre or Postmenopausal)	56	No	N0 (i-)	Stage IIB		TRUE	9b13927c-7357-44fd-8385-92ae6a656b7d	b98aa84f-5144-4062-badc-32e89368d684	LIVING	68.4	0429FA9A-AD19-424C-94ED-1A902119E559	Alive	FEMALE	TUMOR FREE	NA	0	19	No	WHITE	Primary Tumor
TCGA-B6-A0RH-01	TCGA-B6-A0RH		6th	T2	M0	-18759	Immunohistochemistry	0.278	5749	6821	NA	51		71.1	Recurred/Progressed	Positive	NOT HISPANIC OR LATINO	Incisional Biopsy		2011-03-15	C50.9	YES	130	C50.9	8500/3	NO	0	YES	Indeterminate (neither Pre or Postmenopausal)	34	No	N0 (i-)	Stage IIA		TRUE	c3148e68-1739-4334-abda-1dcbc2166846	5559a7ea-5db7-4af8-b491-24bb9871b89d	LIVING	189	3801F39A-6F4B-40C0-9625-9E0818266819	Alive	FEMALE	TUMOR FREE	NA	0	23	No	BLACK OR AFRICAN AMERICAN	Primary Tumor
TCGA-B6-A0RI-01	TCGA-B6-A0RI			T4b	M0	-16138	IHC	0.0928	6796	6755	NA	44		36.1	Recurred/Progressed	Negative	NOT HISPANIC OR LATINO	Other method, specify:	Biopsy, NOS	2010-11-02	C50.9	YES	50	C50.4	8500/3	NO	0		Indeterminate (neither Pre or Postmenopausal)	18	No	N1b	Stage IIIB		TRUE	bfd55808-dddd-44c3-97d7-41600497b992	973ee776-e287-4568-a43d-7b16cc0094a9	LIVING	234	F2B21F52-74F4-44C5-9991-60EBCC4E43A6	Alive	FEMALE	WITH TUMOR	NA	6	15	No	WHITE	Primary Tumor
TCGA-B6-A0RL-01	TCGA-B6-A0RL			T2	M0	-22238	Image Analysis	0.321	NA	6336	2469	60		NA		Negative	NOT HISPANIC OR LATINO	Fine needle aspiration biopsy		2010-11-02	C50.9	YES	170	C50.9	8500/3	NO	0			36	No	N0 (i-)	Stage IIA		TRUE	5562455d-bbb8-46eb-a510-e8c6e1e26789	cb62cd95-92ca-4b83-b8db-1cb9584befc0	DECEASED	81.1	6C50D456-A828-4514-92D2-01A5900B74F1	Dead	FEMALE	TUMOR FREE	NA	0	16	No	BLACK OR AFRICAN AMERICAN	Primary Tumor
TCGA-B6-A0RM-01	TCGA-B6-A0RM			TX	MX	-21047	Image Analysis	0.0804	NA	6279	2373	57		NA		Positive	NOT HISPANIC OR LATINO	Other method, specify:	Biopsy, NOS	2010-11-02	C50.9	YES	160	C50.9	8500/3	NO	0		Indeterminate (neither Pre or Postmenopausal)	23	No	NX	Stage X		TRUE	151f3677-6854-4265-9126-d92c646c67ae	e0e00806-1aa3-441d-b22e-6ae01a8473f2	DECEASED	78	EC8093CD-66E7-4466-99AD-B2A6B93526FD	Dead	FEMALE	TUMOR FREE	NA	NA	0	No	BLACK OR AFRICAN AMERICAN	Primary Tumor
TCGA-B6-A0RN-01	TCGA-B6-A0RN			T1c	M0	-22077	Image Analysis	0.0741	5261	6286	NA	60		173	DiseaseFree	Negative	NOT HISPANIC OR LATINO	Other method, specify:	Biopsy, NOS	2010-11-02	C50.9	YES	130	C50.9	8500/3	NO	0		Post (prior bilateral ovariectomy OR >12 mo since LMP with no prior hysterectomy)	28	No	N0 (i-)	Stage IA		TRUE	2199b7a1-bd47-4bb5-b36a-a3e291e3e259	3652a456-36ee-4746-b25d-a6303984b77f	LIVING	173	5F08632D-BC1D-4414-80C1-75F67F3A07AF	Alive	FEMALE	TUMOR FREE	NA	0	19	No	WHITE	Primary Tumor
TCGA-B6-A0RO-01	TCGA-B6-A0RO			T4	M0	-26269	Image Analysis	0.471	4929	6035	NA	71		162	DiseaseFree	Negative	NOT HISPANIC OR LATINO	Other method, specify:	Biopsy, NOS	2010-11-02	C50.9	YES	140	C50.9	8500/3	NO	0		Post (prior bilateral ovariectomy OR >12 mo since LMP with no prior hysterectomy)	34	No	N1a	Stage IIIB		TRUE	0b172e29-6166-4863-803d-a0a010887c11	edf2dbbe-b055-4d90-bc41-72355621b99e	LIVING	162	EFA0354A-641D-4EC2-A1BE-4ACC7CE421DF	Alive	FEMALE	TUMOR FREE	NA	2	17	No	WHITE	Primary Tumor
TCGA-B6-A0RP-01	TCGA-B6-A0RP			T2	M0	-26941	Image Analysis	0.488	NA	5890	3126	73		91.6	Recurred/Progressed	Positive	NOT HISPANIC OR LATINO	Other method, specify:	Biopsy, NOS	2010-11-02	C50.9	YES	230	C50.4	8522/3	NO	0		Post (prior bilateral ovariectomy OR >12 mo since LMP with no prior hysterectomy)	20	No	N1b	Stage IIIB		TRUE	451e1a67-47e6-4738-99d7-fb7771ef61a3	6f261668-4373-4bf7-940b-38acf79b97b5	DECEASED	103	889D6E80-A656-49FA-9DFA-1674EB3877F6	Dead	FEMALE		NA	2	15	No	WHITE	Primary Tumor
TCGA-B6-A0RQ-01	TCGA-B6-A0RQ		6th	T3	M0	-25004	Image Analysis	0.0134	NA	5896	4273	68		NA		Positive	NOT HISPANIC OR LATINO	Excisional Biopsy		2011-03-15	C50.9	YES	160	C50.2	8520/3	NO	0	YES	Post (prior bilateral ovariectomy OR >12 mo since LMP with no prior hysterectomy)	11	No	N0 (i-)	Stage IIB		TRUE	caa9b533-24b4-4ecd-9159-c165de049f6a	d43f3908-db7e-4064-b245-9e7ae83a47cc	DECEASED	140	46B892B9-82C8-4305-BCB9-805F6F5FC90A	Dead	FEMALE	TUMOR FREE	NA	0	14	No	WHITE	Primary Tumor
TCGA-B6-A0RS-01	TCGA-B6-A0RS			T2	M0	-14134		0.428	NA	7858	3063	38		67	Recurred/Progressed	Negative	NOT HISPANIC OR LATINO	Other method, specify:	Biopsy, NOS	2010-11-02	C50.9	YES	80	C50.9	8500/3	NO	0		Indeterminate (neither Pre or Postmenopausal)	85	No	N0 (i-)	Stage IIA		TRUE	9416ff9b-6f29-4554-b04d-b537a3ae3969	7c44fbbe-00db-4ad7-86a9-61b5968d1a00	DECEASED	101	6E169005-180B-42C5-9CDC-F6699FAB5AB5	Dead	FEMALE	WITH TUMOR	NA	0	15	No	WHITE	Primary Tumor
TCGA-B6-A0RT-01	TCGA-B6-A0RT			T3	M0	-14374	Image Analysis	0.0237	2721	5047	NA	39		89.4	DiseaseFree	Close	NOT HISPANIC OR LATINO	Excisional Biopsy		2010-11-03	C50.9	YES	230	C50.4	8500/3	NO	0		Indeterminate (neither Pre or Postmenopausal)	31	No	N1	Stage IIIA		TRUE	4bf50455-9ab7-4521-a791-089f66d3b877	c2300b5b-43a7-43b8-8cd1-22ff7e89a21a	LIVING	89.4	64D53A4B-4735-4AD2-A413-520797F5F9CB	Alive	FEMALE	TUMOR FREE	NA	1	23	No	WHITE	Primary Tumor
TCGA-B6-A0RU-01	TCGA-B6-A0RU			T1c	M0	-17996	Image Analysis	0.383	3991	4214	NA	49		131	DiseaseFree	Negative	NOT HISPANIC OR LATINO	Core needle biopsy		2010-11-02	C50.9	YES	170	C50.9	8523/3	NO	0		Indeterminate (neither Pre or Postmenopausal)	41	No	N0 (i-)	Stage IA		TRUE	6956473b-92e5-4069-a26b-b48e280e76f2	c94232f8-2e37-46d0-b12a-b8e920e659d9	LIVING	131	39C689CA-F7BA-4554-BEC8-11F9C8142D9C	Alive	FEMALE	TUMOR FREE	NA	0	15	No	WHITE	Primary Tumor
TCGA-B6-A0RV-01	TCGA-B6-A0RV			T3	M0	-15507	Image Analysis	0.164	4788	5165	NA	42		157	DiseaseFree	Negative	NOT HISPANIC OR LATINO	Incisional Biopsy		2010-11-02	C50.9	YES	480	C50.9	8522/3	NO	0		Indeterminate (neither Pre or Postmenopausal)	35	No	N2	Stage IIIA		TRUE	cd3faa15-743c-476f-ab0d-f205b14126b6	8a0c0515-abdd-4e78-9205-bd8f80f60397	LIVING	157	FF5D000A-4600-4C42-8802-4BCD29F61CA6	Alive	FEMALE	TUMOR FREE	NA	5	10	No	WHITE	Primary Tumor
TCGA-B6-A0WS-01	TCGA-B6-A0WS		6th	T1c	MX	-21230	Image Analysis	0.228	NA	5113	2965	58		NA		Positive	NOT HISPANIC OR LATINO	Fine needle aspiration biopsy		2011-03-15	C50.9	YES	110	C50.9	8500/3	NO	0	NO	Indeterminate (neither Pre or Postmenopausal)	13	No	NX	Stage X		TRUE	197741de-a098-4f04-bb37-8ea8b3bb39bc	5dc7e339-f508-4d0d-ae4e-016a5425aba4	DECEASED	97.4	36AE47A6-B881-4C1D-8436-EB65783243CF	Dead	FEMALE	TUMOR FREE	NA	NA	NA	No	BLACK OR AFRICAN AMERICAN	Primary Tumor
TCGA-B6-A0WT-01	TCGA-B6-A0WT			T2	M0	-22362	Image Analysis	0.152	5396	5606	NA	61		127	Recurred/Progressed	Negative	NOT HISPANIC OR LATINO	Fine needle aspiration biopsy		2010-12-14	C50.9	YES	90	C50.9	8500/3	NO	0		Post (prior bilateral ovariectomy OR >12 mo since LMP with no prior hysterectomy)	18	No	N1	Stage IIB		TRUE	d7195183-9fe4-4b17-bcfd-9367d2e539ce	1940c04b-a08a-4cce-9915-483656d5b4c3	LIVING	189	BACD800B-F320-472C-ACFF-175E9F525E9F	Alive	FEMALE	TUMOR FREE	NA	1	15	No	WHITE	Primary Tumor
TCGA-B6-A0WV-01	TCGA-B6-A0WV			T2	M0	-24798	Image Analysis	0.434	NA	5536	2422	67		NA		Negative	NOT HISPANIC OR LATINO	Incisional Biopsy		2010-12-14	C50.9	YES	30	C50.9	8500/3	NO	0		Post (prior bilateral ovariectomy OR >12 mo since LMP with no prior hysterectomy)	26	No	N1b	Stage IIB		TRUE	7588a286-6935-424a-bc5f-92e24c83eb37	9caf2f97-a056-4274-be21-cf06656116fa	DECEASED	79.6	506BFD3B-240B-440E-B7A0-E596FC0B7F72	Dead	FEMALE	TUMOR FREE	NA	4	7	No	WHITE	Primary Tumor
TCGA-B6-A0WW-01	TCGA-B6-A0WW			T2	MX	-21479	Image Analysis	0.313	547	4664	558	58		14.7	Recurred/Progressed	Negative	NOT HISPANIC OR LATINO	Incisional Biopsy		2010-12-14	C50.9	YES	30	C50.2	8500/3	NO	0		Indeterminate (neither Pre or Postmenopausal)	30	No	N1b	Stage X		TRUE	f02931f8-d72a-481d-b532-8b141dab115f	cbc8cfce-6c77-4b2e-90a1-198eaaba6fde	DECEASED	18.3	F05F5886-DC5D-4685-B2BF-57A68A0BB7B9	Dead	FEMALE	WITH TUMOR	NA	5	18	No	BLACK OR AFRICAN AMERICAN	Primary Tumor
TCGA-B6-A0WX-01	TCGA-B6-A0WX			T3	M0	-14770	Image Analysis	0.462	NA	4490	653	40		19	Recurred/Progressed	Negative	NOT HISPANIC OR LATINO	Excisional Biopsy		2010-12-14	C50.9	YES	300	C50.9	8520/3	NO	0		Pre (<6 months since LMP AND no prior bilateral ovariectomy AND not on estrogen replacement)	24	No	N1b	Stage IIIA		TRUE	a482fc4c-ff1d-46a0-a968-7df06422cc4b	7daa9124-2878-4708-ae74-28b17ef4898c	DECEASED	21.4	EE5BB205-D59B-4FEF-8D8F-D5720EDEB075	Dead	FEMALE	WITH TUMOR	NA	9	21	No	BLACK OR AFRICAN AMERICAN	Primary Tumor
TCGA-B6-A0WY-01	TCGA-B6-A0WY			T3	M0	-14778	Image Analysis	0.0836	NA	5294	3461	40		66.1	Recurred/Progressed	Negative	NOT HISPANIC OR LATINO	Core needle biopsy		2010-12-14	C50.9	YES	30	C50.9	8500/3	NO	0		Pre (<6 months since LMP AND no prior bilateral ovariectomy AND not on estrogen replacement)	22	No	N1b	Stage IIIA		TRUE	f475d460-75cd-4fe9-aa54-c90be12b4ef8	ed3f6393-6955-41af-bb3a-7723b5dbe41e	DECEASED	114	C0E92852-4146-468C-9713-2DE9C3316B9F	Dead	FEMALE	WITH TUMOR	NA	3	21	No	WHITE	Primary Tumor
TCGA-B6-A0WZ-01	TCGA-B6-A0WZ			T2	M0	-18584	Image Analysis	0.25	3941	5179	NA	50		129	DiseaseFree	Negative	NOT HISPANIC OR LATINO	Fine needle aspiration biopsy		2010-12-14	C50.9	YES	50	C50.4	8500/3	NO	0		Indeterminate (neither Pre or Postmenopausal)	40	No	N1b	Stage IIB		TRUE	08740d7f-5a5e-4dfa-bd48-7fbf228a7a28	5b94a116-7e70-41d4-8c6f-2bae44e591aa	LIVING	129	B5B7CCDD-1ED2-437A-BDF0-684AF474A8A6	Alive	FEMALE	TUMOR FREE	NA	11	21	No	BLACK OR AFRICAN AMERICAN	Primary Tumor
TCGA-B6-A0X0-01	TCGA-B6-A0X0		6th	T1c	M0	-19802	Image Analysis	0.114	NA	5243	3945	54		NA		Negative	NOT HISPANIC OR LATINO	Excisional Biopsy		2011-03-15	C50.9	YES	150	C50.9	8500/3	NO	0	YES	Indeterminate (neither Pre or Postmenopausal)	21	No	N0 (i-)	Stage IA		TRUE	1e68e760-a4cf-4100-bf9c-e50fa8d126f6	14f380df-eda0-4593-b00f-43abc87e22d4	DECEASED	130	84A8BA4A-35F0-46C4-BDB0-64C033AFD1A8	Dead	FEMALE		NA	0	31	No	WHITE	Primary Tumor
TCGA-B6-A0X1-01	TCGA-B6-A0X1			T2	M1	-17629	Image Analysis	0.833	5672	6030	NA	48		15.9	Recurred/Progressed	Negative	NOT HISPANIC OR LATINO	Fine needle aspiration biopsy		2010-12-14	C50.9	YES	240	C50.9	8500/3	NO	0		Indeterminate (neither Pre or Postmenopausal)	51	No	N2	Stage IV		TRUE	178b2c48-c07d-422e-ae17-8bcfd996ad51	d360da4b-c5b4-42e8-96d5-eac486f0ebbd	LIVING	186	D792031E-2CCE-4341-B3B3-C7D1D84F8F6B	Alive	FEMALE	TUMOR FREE	NA	16	21	No	WHITE	Primary Tumor
TCGA-B6-A0X4-01	TCGA-B6-A0X4			T2	M0	-22688	Image Analysis	0.0305	NA	5323	860	62		23.5	Recurred/Progressed	Negative	NOT HISPANIC OR LATINO	Incisional Biopsy		2010-12-14	C50.9	YES	110	C50.9	8500/3	NO	0		Post (prior bilateral ovariectomy OR >12 mo since LMP with no prior hysterectomy)	20	No	N1b	Stage IIB		TRUE	4e42fdc5-2a8b-49e9-87ef-6db7a6692d08	45c3bd72-d260-4663-9091-5058e58f352d	DECEASED	28.3	CA935E8D-ED8A-4485-BDC6-02C07CCE2EA5	Dead	FEMALE	WITH TUMOR	NA	2	21	No	WHITE	Primary Tumor
TCGA-B6-A0X5-01	TCGA-B6-A0X5			T2	M0	-22380	Image Analysis	0.0827	NA	5600	2097	61		44.1	Recurred/Progressed	Negative	NOT HISPANIC OR LATINO			2010-12-14	C50.9	YES	80	C50.9	8500/3	NO	0		Post (prior bilateral ovariectomy OR >12 mo since LMP with no prior hysterectomy)	27	No	N1b	Stage IIB		TRUE	4e6edfe6-adcb-4c12-8ff4-38a79f5887e8	e56e785d-f9b1-4afa-bc2d-b6cebf9e64cc	DECEASED	68.9	29811BAC-AFD1-4951-BDF8-7B859941B634	Dead	FEMALE	WITH TUMOR	NA	3	14	No	BLACK OR AFRICAN AMERICAN	Primary Tumor
TCGA-B6-A0X7-01	TCGA-B6-A0X7			T1c	MX	-22713	Image Analysis	0.17	NA	6012	1791	62		36.6	Recurred/Progressed	Negative	NOT HISPANIC OR LATINO	Excisional Biopsy		2010-12-14	C50.9	YES	40	C50.9	8500/3	NO	0		Post (prior bilateral ovariectomy OR >12 mo since LMP with no prior hysterectomy)	15	No	NX	Stage X		TRUE	5b9a5cd2-5ec8-48a0-b9f2-da9bede0b089	de27ccdd-56a4-44e9-89a3-ff0173026315	DECEASED	58.8	0FB6BB0F-C3F9-43E6-8BDE-90D1DBA298CA	Dead	FEMALE		NA	NA	0	No	WHITE	Primary Tumor
TCGA-B6-A1KC-01	TCGA-B6-A1KC		6th	T2	M0	-24791	image cytometry	0.529	1326	2781	NA	67		43.6	DiseaseFree	Negative	NOT HISPANIC OR LATINO	Core needle biopsy		2011-07-19	C50.9	YES	30	C50.9	8500/3	NO	0	YES	Post (prior bilateral ovariectomy OR >12 mo since LMP with no prior hysterectomy)	27	No	N1	Stage IIA		TRUE	1502c7d7-1535-4e56-9f34-30623acd50d5	0cc10a1e-a90a-4c55-87a2-a74d47474a4a	LIVING	43.6	E1FDF8EB-9D75-4629-9C78-6019DAF8190E	Alive	FEMALE	TUMOR FREE	NA	1	2	No	WHITE	Primary Tumor
TCGA-B6-A1KF-01	TCGA-B6-A1KF		5th	T2	M0	-24891		0.557	3088	4536	NA	68		101	DiseaseFree	Negative	NOT HISPANIC OR LATINO	Core needle biopsy		2011-07-19	C50.9	YES	20	C50.9	8500/3	NO	0	YES	Post (prior bilateral ovariectomy OR >12 mo since LMP with no prior hysterectomy)	45	No	N1	Stage IIB		TRUE	f30eb65f-fb44-4062-ac39-a38d072f655f	11678ad0-81ae-4420-8976-52f99c5d7d5d	LIVING	101	40EE8416-9DD8-457D-94AC-A871B5C62873	Alive	FEMALE	TUMOR FREE	NA	2	14	No	WHITE	Primary Tumor
TCGA-B6-A1KI-01	TCGA-B6-A1KI		6th	T1c	M0	-23031	image cytometry	0.109	1463	2634	NA	63		73.5	DiseaseFree	Negative	NOT HISPANIC OR LATINO	Core needle biopsy		2011-07-19	C50.9	YES	40	C50.9	8500/3	NO	0	YES	Post (prior bilateral ovariectomy OR >12 mo since LMP with no prior hysterectomy)	17	No	N0	Stage I		TRUE	1dafdd64-527d-4d46-bbdf-7a97774f881b	a6b12e25-7b2d-460c-876f-02a75a82d7d2	LIVING	73.5	C2711492-0BDD-487E-9C9B-CEF20BBE57C3	Alive	FEMALE	TUMOR FREE	NA	0	1	No	WHITE	Primary Tumor
TCGA-B6-A1KN-01	TCGA-B6-A1KN		5th	T4b	M0	-21183		0.286	3330	4537	NA	57		139	DiseaseFree	Negative	NOT HISPANIC OR LATINO	Core needle biopsy		2011-07-19	C50.9	YES	80	C50.9	8500/3	NO	0	YES	Post (prior bilateral ovariectomy OR >12 mo since LMP with no prior hysterectomy)	60	No	N1	Stage IIIB		TRUE	271404de-24e8-43f6-806b-fb510c1124c4	ca44a8bf-428e-48b5-ae58-614f9a3e0fd8	LIVING	139	72996825-1FFA-4C51-8DB0-DA74BCB595EB	Alive	FEMALE	TUMOR FREE	NA	24	30	No	WHITE	Primary Tumor
TCGA-B6-A2IU-01	TCGA-B6-A2IU		5th	T2	M0	-22905	image cytometry	0.225	4840	4665	NA	62		139	Recurred/Progressed	Negative	HISPANIC OR LATINO	Core needle biopsy		2012-01-11	C50.9	YES	140	C50.9	8520/3	NO	0	YES	Indeterminate (neither Pre or Postmenopausal)	38	No	N0	Stage IIA		TRUE	9857BE0C-AECA-4A43-90B1-0535BD08E086	571468B9-6FB4-40C6-8830-1FFAD5419B60	LIVING	170	EE769039-220E-4158-8999-09F17AFB4C46	Alive	FEMALE		NA	0	28	No	WHITE	Primary Tumor
TCGA-BH-A0AU-01	TCGA-BH-A0AU		6th	T2	M0	-16688		0.425	746	583	NA	45		24.5	DiseaseFree	Negative	NOT HISPANIC OR LATINO	Core needle biopsy		2011-07-27	C50.9	YES	200	C50.9	8500/3	NO	0	YES	Pre (<6 months since LMP AND no prior bilateral ovariectomy AND not on estrogen replacement)	18	No	N0	Stage IIA		TRUE	360d1d6d-cf3e-4c78-b36f-ef5e3160aa6b	9df5fb66-44da-4d92-899a-99c07cd23fff	LIVING	24.5	4C942A1D-53B2-43A6-9B96-5155CCDEEC34	Alive	FEMALE	TUMOR FREE	NA	0	2	No	WHITE	Primary Tumor
TCGA-BH-A0AV-01	TCGA-BH-A0AV		6th	T1c	M0	-19314		0.616	1180	761	NA	52		38.8	DiseaseFree	Negative		Core needle biopsy		2011-08-02	C50.9	YES	250	C50.9	8500/3	NO	0	YES		56	No	N0	Stage I		TRUE	790ff5db-b7f3-4946-aaed-305f66b1dd6a	dce6cac3-6c76-4574-b7a8-c7083b12f22e	LIVING	38.8	6DFA6F0F-09BC-4246-87B9-247207B74A39	Alive	FEMALE	TUMOR FREE	NA	0	2	No	BLACK OR AFRICAN AMERICAN	Primary Tumor
TCGA-BH-A0AW-01	TCGA-BH-A0AW			T1c	M0	-20468	ER Positive H-Score 95	0.291	622	545	NA	56		20.4	DiseaseFree	Negative		Core needle biopsy		2010-11-03	C50.9	YES	50	C50.9	8500/3	NO	0		Post (prior bilateral ovariectomy OR >12 mo since LMP with no prior hysterectomy)	116	No	N1a	Stage IIA		TRUE	c5891c7a-fd24-4891-8f51-373967e4a6dd	18bb30b2-6018-45af-9393-f7a8ea40fa04	LIVING	20.4	D1B30DA1-FF63-4FC7-AB8B-818331EE6D72	Alive	FEMALE	TUMOR FREE	0	2	12	No	WHITE	Primary Tumor
TCGA-BH-A0AZ-01	TCGA-BH-A0AZ		6th	T3	cM0 (i+)	-17465		0.285	867	575	NA	47		28.5	DiseaseFree	Negative	NOT HISPANIC OR LATINO	Core needle biopsy		2011-07-27	C50.9	YES	490	C50.9	8500/3	NO	0	YES	Pre (<6 months since LMP AND no prior bilateral ovariectomy AND not on estrogen replacement)	47	No	N1a	Stage IIIA		TRUE	518f231c-f5f9-4a39-a97b-7fd5666d3e50	aafc7bc4-1e57-4df9-9bad-a04a4d9edebd	LIVING	28.5	6721193F-FE9D-4573-BF2A-ABAECF57DFD9	Alive	FEMALE	TUMOR FREE	NA	1	13	No	WHITE	Primary Tumor
TCGA-BH-A0B0-01	TCGA-BH-A0B0		6th	T1c	M0	-20776		0.234	1428	1223	NA	56		46.9	DiseaseFree	Negative		Fine needle aspiration biopsy		2011-07-27	C50.9	YES	320	C50.9	8500/3	NO	0	YES	Peri (6-12 months since last menstrual period)	39	No	N0	Stage I		TRUE	66af34ea-f471-4092-aff6-9ac9a5b75b11	b25afcbc-accf-4f14-acc3-2f8bb700e5d2	LIVING	46.9	EB09D890-879C-4874-AE3F-47E41C2C66FE	Alive	FEMALE	TUMOR FREE	NA	0	2	No	BLACK OR AFRICAN AMERICAN	Primary Tumor
TCGA-BH-A0B3-01	TCGA-BH-A0B3			T2	M0	-19479		0.215	1203	1030	NA	53		39.5	DiseaseFree	Negative		Core needle biopsy		2010-11-03	C50.9	YES	280	C50.9	8500/3	NO	0		Post (prior bilateral ovariectomy OR >12 mo since LMP with no prior hysterectomy)	35	No	N1a	Stage IIB		TRUE	18eb4dfc-556f-4bf3-a411-4780209ed1e0	fc1f0ad4-8412-4143-8ebf-fa6592f396e9	LIVING	39.5	A6E2735B-AAD3-48D7-8289-306257CB5B6F	Alive	FEMALE	TUMOR FREE	NA	2	29	No	WHITE	Primary Tumor
TCGA-BH-A0B4-01	TCGA-BH-A0B4			T2	M0	-23980		0.368	1191	995	NA	65		39.1	DiseaseFree	Negative		Core needle biopsy		2010-11-04	C50.9	YES	340	C50.9	8500/3	NO	0			55	No	N2	Stage IIIA		TRUE	c710f4ab-fbd9-42ed-95d4-4e6d51207f38	481cdbff-1f84-4508-ad9f-21a61009d68a	LIVING	39.1	00C75246-4343-490D-9782-E6C0068C77B2	Alive	MALE	TUMOR FREE	NA	6	10	No	WHITE	Primary Tumor
TCGA-BH-A0B5-01	TCGA-BH-A0B5		6th	T2	M0	-14920		0.233	1471	1008	NA	40		48.3	DiseaseFree	Positive	NOT HISPANIC OR LATINO	Fine needle aspiration biopsy		2011-08-02	C50.9	YES	700	C50.9	8520/3	NO	0	YES	Pre (<6 months since LMP AND no prior bilateral ovariectomy AND not on estrogen replacement)	57	No	N2a	Stage IIIA		TRUE	9da462b0-93c2-4305-89f6-7199a30399a7	a0de3018-8916-4e06-8ba1-beb1d218e30e	LIVING	48.3	F44C515D-5A58-4382-A147-4429A78D434F	Alive	FEMALE	TUMOR FREE	NA	5	24	No	WHITE	Primary Tumor
TCGA-BH-A0B6-01	TCGA-BH-A0B6		6th	T1c	M0	-17346		0.157	1732	1405	NA	47		56.9	DiseaseFree	Negative	NOT HISPANIC OR LATINO	Fine needle aspiration biopsy		2011-08-04	C50.9	YES	250	C50.9	8500/3	NO	0	YES		590	Yes	N0	Stage I		TRUE	FA4E082A-D213-412E-8D91-842A6F4BEF12	930B82A6-A039-4F8F-8487-B0ABB4FE7ABA	LIVING	56.9	06602AD0-AC4D-4674-B4B0-2D207C3E78DC	Alive	FEMALE	TUMOR FREE	NA	0	4	Yes	WHITE	Primary Tumor
TCGA-BH-A0B7-01	TCGA-BH-A0B7		6th	T2	M0	-15593		0.125	1733	1391	NA	42		56.9	DiseaseFree	Negative	NOT HISPANIC OR LATINO	Core needle biopsy		2011-08-04	C50.9	YES	320	C50.9	8500/3	NO	0	YES	Pre (<6 months since LMP AND no prior bilateral ovariectomy AND not on estrogen replacement)	25	No	N1a	Stage IIB		TRUE	214a4507-d974-4b3e-8525-7408fccc6a0f	45c79141-a125-4305-b1b7-c838de1af8a3	LIVING	56.9	B5E5A3B8-108E-47D3-99DA-EC7A64B5FA9C	Alive	FEMALE		NA	1	17	No	WHITE	Primary Tumor
TCGA-BH-A0B9-01	TCGA-BH-A0B9			T1c	M0	-16310		0.307	1572	1391	NA	44		51.6	DiseaseFree	Negative		Core needle biopsy		2010-11-04	C50.9	YES	190	C50.9	8500/3	NO	0		Pre (<6 months since LMP AND no prior bilateral ovariectomy AND not on estrogen replacement)	36	No	N0 (i-)	Stage IA		TRUE	5a57dc25-d252-4b22-b192-4de630d7002f	8137ffee-bb4f-4e5f-b831-acfc9c5585a8	LIVING	51.6	EB00527B-1E37-420E-85E4-10063DB4BC1C	Alive	FEMALE	TUMOR FREE	NA	0	1	No	WHITE	Primary Tumor
TCGA-BH-A0BA-01	TCGA-BH-A0BA			T3	M0	-18839		0.863	1132	1266	NA	51		37.2	DiseaseFree	Negative		Core needle biopsy		2010-11-04	C50.9	YES	360	C50.9	8522/3	NO	0		Pre (<6 months since LMP AND no prior bilateral ovariectomy AND not on estrogen replacement)	29	No	N3a	Stage IIIC		TRUE	49dc3e68-6206-4f16-969f-a758cc7be8ed	992d3519-cd51-4f48-880c-81fef52be1bf	LIVING	37.2	142F03FE-5B60-416D-8DCD-EC34DB5495DB	Alive	FEMALE	TUMOR FREE	NA	27	27	No	WHITE	Primary Tumor
TCGA-BH-A0BC-01	TCGA-BH-A0BC			T2	M0	-21949		0.197	974	1098	NA	60		32	DiseaseFree	Negative		Core needle biopsy		2010-11-04	C50.9	YES	160	C50.9	8500/3	NO	0		Post (prior bilateral ovariectomy OR >12 mo since LMP with no prior hysterectomy)	26	No	N3	Stage IIIC		TRUE	327a2395-85c8-42e1-9638-8e037a1723ed	e586a2b3-1132-45db-9283-dc318653a09f	LIVING	32	9714A9F8-B507-43E6-9D56-1852F5D1F675	Alive	FEMALE	TUMOR FREE	NA	12	18	No	WHITE	Primary Tumor
TCGA-BH-A0BD-01	TCGA-BH-A0BD			T1c	M0	-17275	H-Score-190	0.179	554	364	NA	47		18.2	DiseaseFree	Negative		Core needle biopsy		2010-11-04	C50.9	YES	90	C50.9	8500/3	NO	0		Pre (<6 months since LMP AND no prior bilateral ovariectomy AND not on estrogen replacement)	18	No	N1a	Stage IIA		TRUE	b379bfb8-284e-4300-8325-85cfd6809cb8	832b8766-0e59-4ad4-b4c9-1e39b2ce4fb1	LIVING	18.2	CE70DD1E-BCA4-4F89-AA5B-D90FE18A36FF	Alive	FEMALE	TUMOR FREE	NA	2	9	No	WHITE	Primary Tumor
TCGA-BH-A0BF-01	TCGA-BH-A0BF		6th	T2	M0	-20691		0.29	782	413	NA	56		25.7	DiseaseFree	Negative	NOT HISPANIC OR LATINO	Core needle biopsy		2011-08-05	C50.9	YES	260	C50.9	8500/3	NO	0	YES	Post (prior bilateral ovariectomy OR >12 mo since LMP with no prior hysterectomy)	25	No	N1mi	Stage IIB		TRUE	e6b79d7a-ed6b-459a-b040-d142616e7ab4	4dc7d403-3ea7-4d02-94a7-fb33511bab09	LIVING	25.7	0D76394C-40B4-4E74-8A80-FAE00E21FD10	Alive	FEMALE	TUMOR FREE	NA	1	3	No	WHITE	Primary Tumor
TCGA-BH-A0BG-01	TCGA-BH-A0BG		6th	T1	M0	-26988		0.426	756	798	NA	73		24.8	DiseaseFree	Negative	NOT HISPANIC OR LATINO	Core needle biopsy		2011-08-08	C50.9	YES	50	C50.9	8500/3	NO	0	YES	Post (prior bilateral ovariectomy OR >12 mo since LMP with no prior hysterectomy)	34	No	N0	Stage I		TRUE	4f608829-ffc4-4527-886e-6bc764ab29f5	4aa1d78b-37cc-43be-b4f7-ce677992024e	LIVING	24.8	CB0C2E8E-2D5D-492C-9C7E-0ECD0458425A	Alive	FEMALE	TUMOR FREE	NA	0	1	No	WHITE	Primary Tumor
TCGA-BH-A0BJ-01	TCGA-BH-A0BJ			T2	M0	-15027	H-Score 300	0.4	660	595	NA	41		21.7	DiseaseFree	Negative		Core needle biopsy		2010-11-08	C50.9	YES	110	C50.9	8500/3	NO	0		Pre (<6 months since LMP AND no prior bilateral ovariectomy AND not on estrogen replacement)	29	No	N1a	Stage IIB		TRUE	d6f911b5-e895-43f8-8f86-0ac2f1bc6fae	d1991ebd-1cd1-4c2d-ac99-2a6ecd3f90f1	LIVING	21.7	A3CDF051-4162-47EC-BE8A-1519A5564518	Alive	FEMALE	TUMOR FREE	NA	2	18	No	WHITE	Primary Tumor
TCGA-BH-A0BL-01	TCGA-BH-A0BL		6th	T1c	M0	-12841		0.343	1340	1135	NA	35		44	DiseaseFree	Negative	NOT HISPANIC OR LATINO	Core needle biopsy		2011-08-08	C50.9	YES	60	C50.9	8500/3	NO	0	YES	Pre (<6 months since LMP AND no prior bilateral ovariectomy AND not on estrogen replacement)	59	No	N0	Stage I		TRUE	92b5de82-0221-4df1-8094-80f40c0bb4fa	e11dab7d-dc9c-416c-8200-ebdf8a64e3ea	LIVING	44	DD647293-3CEA-4845-A0B3-D7000CBAB4C0	Alive	FEMALE	TUMOR FREE	NA	0	2	No	WHITE	Primary Tumor
TCGA-BH-A0BM-01	TCGA-BH-A0BM		6th	T2	M0	-20049		0.0936	1117	1080	NA	54		61.6	DiseaseFree	Negative		Core needle biopsy		2010-11-08	C50.9	YES	100	C50.9	8500/3	NO	0		Post (prior bilateral ovariectomy OR >12 mo since LMP with no prior hysterectomy)	30	No	N1a	Stage IIB		TRUE	c2aeee6c-ba10-4cf9-b560-c739580f7bf3	5423b7f8-d2bb-47c8-9af8-3d3e1276888c	LIVING	61.6	7F75F15A-2476-4FFD-97B3-313F06568E21	Alive	FEMALE	TUMOR FREE	NA	3	24	No	WHITE	Primary Tumor
TCGA-BH-A0BO-01	TCGA-BH-A0BO		6th	T1b	M0	-19767		0.018	1085	1162	NA	54		35.6	DiseaseFree	Negative	NOT HISPANIC OR LATINO	Core needle biopsy		2011-08-09	C50.9	YES	290	C50.9	8500/3	NO	0	YES	Pre (<6 months since LMP AND no prior bilateral ovariectomy AND not on estrogen replacement)	23	No	N0	Stage I		TRUE	26573441-eedb-4364-966c-e7f803deef19	b6702fc2-9794-466e-a2e3-a8407674d05f	LIVING	35.6	DDAB2FC2-D9F0-4D8F-A7FE-6C0B823E6823	Alive	FEMALE	TUMOR FREE	NA	0	3	No	WHITE	Primary Tumor
TCGA-BH-A0BP-01	TCGA-BH-A0BP		6th	T1c	M0	-27917		0.674	1481	1217	NA	76		48.6	DiseaseFree	Negative	NOT HISPANIC OR LATINO	Core needle biopsy		2011-08-09	C50.9	YES	150	C50.9	8500/3	NO	0	YES	Post (prior bilateral ovariectomy OR >12 mo since LMP with no prior hysterectomy)	118	No	N0	Stage I		TRUE	f251cb6c-d18e-4691-9c82-24ed1ac0abf9	35b5f5a8-dd85-46d3-97cc-444060b2a11b	LIVING	48.6	2444E1FE-E0AB-4AA0-9081-967426B90EE6	Alive	FEMALE	TUMOR FREE	NA	0	3	No	WHITE	Primary Tumor
TCGA-BH-A0BQ-01	TCGA-BH-A0BQ		6th	T1c	M0	-14494		0.101	827	1197	NA	39		27.2	DiseaseFree	Negative	NOT HISPANIC OR LATINO	Core needle biopsy		2011-08-10	C50.9	YES	120	C50.9	8500/3	NO	0	YES	Pre (<6 months since LMP AND no prior bilateral ovariectomy AND not on estrogen replacement)	20	No	N0	Stage I		TRUE	b3bb8fd6-ee54-4813-b042-2bbe70115382	18dddb4e-11d6-4fe7-b44a-48342374a5b1	LIVING	27.2	24245506-25BA-411D-8A43-52DB8F6B6037	Alive	FEMALE	TUMOR FREE	NA	0	2	No	WHITE	Primary Tumor
TCGA-BH-A0BR-01	TCGA-BH-A0BR		6th	T1c	M0	-21622		0.465	1633	1170	NA	59		53.6	DiseaseFree	Negative	NOT HISPANIC OR LATINO	Core needle biopsy		2011-08-10	C50.9	YES	160	C50.9	8500/3	NO	0	YES	Post (prior bilateral ovariectomy OR >12 mo since LMP with no prior hysterectomy)	60	No	N0	Stage I		TRUE	3ecb0147-276d-486c-9af0-ce437c24ba83	581cc2a6-e95c-46e1-8530-598a616e86be	LIVING	53.6	6122CE59-23C0-4205-91B5-B71E39C6EAB8	Alive	FEMALE	TUMOR FREE	NA	0	3	No	WHITE	Primary Tumor
TCGA-BH-A0BS-01	TCGA-BH-A0BS		6th	T3	M0	-20374		0.0493	1641	1164	NA	55		53.9	DiseaseFree	Negative	NOT HISPANIC OR LATINO	Core needle biopsy		2011-08-18	C50.9	YES	180	C50.9	8500/3	NO	0	YES	Post (prior bilateral ovariectomy OR >12 mo since LMP with no prior hysterectomy)	11	No	N1c	Stage IIIA		TRUE	2b22db1d-54a1-4b9e-a86e-a174cf51d95c	2f125802-32af-40b6-b4c8-4018740ccee9	LIVING	53.9	A231BC51-EFA3-4FEB-A83F-C793FFF8E607	Alive	FEMALE	TUMOR FREE	NA	0	11	No	WHITE	Primary Tumor
TCGA-BH-A0BT-01	TCGA-BH-A0BT		6th	T1c	M0	-20625		0.375	1386	1167	NA	56		45.5	DiseaseFree	Negative	NOT HISPANIC OR LATINO	Core needle biopsy		2011-08-02	C50.9	YES	140	C50.9	8500/3	NO	0			31	No	N1mi	Stage IIA		TRUE	a32cb96a-78bf-456e-a6ab-2d47b2c67ad4	7f7d8229-3daf-48be-bd16-ffe4314528b1	LIVING	45.5	18E4043D-34BF-4CD1-9E2D-F906C7C7B019	Alive	FEMALE		NA	NA	NA	No	WHITE	Primary Tumor
TCGA-BH-A0BV-01	TCGA-BH-A0BV			T2	M0	-28699		0.173	1519	1328	NA	78		49.9	DiseaseFree	Negative		Core needle biopsy		2010-11-09	C50.9	YES	450	C50.9	8500/3	NO	0		Post (prior bilateral ovariectomy OR >12 mo since LMP with no prior hysterectomy)	29	No	N1a	Stage IIB		TRUE	87f03d04-e651-4a6e-aea6-1c946aa46202	ce3c01d9-e8c7-4bd6-84f9-741f38b07267	LIVING	49.9	7C877EE0-B4BC-4B17-94AB-81B67C7B6DB3	Alive	FEMALE	TUMOR FREE	NA	2	25	No	WHITE	Primary Tumor
TCGA-BH-A0BW-01	TCGA-BH-A0BW		6th	T1c	M0	-25974		0.395	355	1344	NA	71		11.7	DiseaseFree	Negative	NOT HISPANIC OR LATINO	Core needle biopsy		2011-08-10	C50.9	YES	170	C50.9	8500/3	NO	0	YES	Post (prior bilateral ovariectomy OR >12 mo since LMP with no prior hysterectomy)	82	No	N0	Stage I		TRUE	5d1d00c6-fcae-479e-ae1e-de76efd41d98	dbeeddc1-d149-46f7-91ff-d057f8c6bffb	LIVING	11.7	14CE78F3-8FB4-476D-A09C-AE87F7919D77	Alive	FEMALE	TUMOR FREE	NA	0	8	No	BLACK OR AFRICAN AMERICAN	Primary Tumor
TCGA-BH-A0BZ-01	TCGA-BH-A0BZ		6th	T3	M0	-21856		0.15	1492	1084	NA	59		49	DiseaseFree	Negative	NOT HISPANIC OR LATINO	Fine needle aspiration biopsy		2011-08-10	C50.9	YES	830	C50.9	8500/3	NO	0	YES	Post (prior bilateral ovariectomy OR >12 mo since LMP with no prior hysterectomy)	206	No	N1a	Stage IIIA		TRUE	4a032bad-e726-48f2-8f39-e3acc109cc91	55906ee0-a385-4ec9-8515-90ab613eca35	LIVING	49	1B56E5A6-35B8-4C60-8BC5-68716C946799	Alive	FEMALE	TUMOR FREE	NA	1	23	No	WHITE	Primary Tumor
TCGA-BH-A0C0-01	TCGA-BH-A0C0			T1c	M0	-23006		0.302	1270	1094	NA	62		41.7	DiseaseFree	Negative		Core needle biopsy		2010-11-08	C50.9	YES	220	C50.9	8500/3	NO	0		Post (prior bilateral ovariectomy OR >12 mo since LMP with no prior hysterectomy)	85	No	N1a	Stage IIA		TRUE	7875018b-91dc-4ab1-83b0-ee3883e2816e	c1898b32-a9c5-410b-a197-572b2a6a2d7a	LIVING	41.7	53DD68D0-C2BE-4EC2-907E-3F1F11D31052	Alive	FEMALE	TUMOR FREE	NA	1	35	No	WHITE	Primary Tumor
TCGA-BH-A0C1-01	TCGA-BH-A0C1		6th	T3	M0	-22377		0.168	1339	891	NA	61		44	DiseaseFree	Negative	NOT HISPANIC OR LATINO	Core needle biopsy		2011-08-11	C50.9	YES	1130	C50.9	8520/3	NO	0	YES	Post (prior bilateral ovariectomy OR >12 mo since LMP with no prior hysterectomy)	26	No	N2a	Stage IIIA		TRUE	d10a4887-373b-4726-a61d-126f950e4a06	A6B0528C-68D5-4E07-A3F3-5DC2E1A6B4F5	LIVING	44	1EC74EB3-9ECC-49B6-AE25-048A5F6A1D02	Alive	FEMALE	TUMOR FREE	NA	8	10	No	WHITE	Primary Tumor
TCGA-BH-A0C3-01	TCGA-BH-A0C3		6th	T1c	M0	-17221		0.167	1464	1335	NA	47		48.1	DiseaseFree	Negative		Core needle biopsy		2011-08-11	C50.9	YES	160	C50.9	8522/3	NO	0	YES	Pre (<6 months since LMP AND no prior bilateral ovariectomy AND not on estrogen replacement)	11	No	N0	Stage I		TRUE	7bcf6d42-eb8f-4aa2-825b-38671d4f9e3a	21ba28ff-89f6-4f02-a135-821efc4f42f8	LIVING	48.1	3A54CF6E-AFDB-4609-A827-77D75BB376A7	Alive	FEMALE	TUMOR FREE	NA	0	4	No	WHITE	Primary Tumor
TCGA-BH-A0C7-01	TCGA-BH-A0C7		6th	T2	M0	-17871		0.304	1305	1338	NA	48		42.9	DiseaseFree	Negative	NOT HISPANIC OR LATINO	Core needle biopsy		2011-08-11	C50.9	YES	340	C50.9	8500/3	NO	0	YES	Peri (6-12 months since last menstrual period)	35	No	N1mi	Stage IIB		TRUE	e1119732-3e97-4259-bc69-dc4269d9496d	BBD9EDD0-2251-4AB0-84F9-F6D8990D0CAB	LIVING	42.9	880F3DC6-4342-4232-A04E-A128F1A8201D	Alive	FEMALE	TUMOR FREE	NA	1	18	No	WHITE	Primary Tumor
TCGA-BH-A0DD-01	TCGA-BH-A0DD		6th	T2	M0	-21386		0.35	1394	1248	NA	58		45.8	DiseaseFree	Negative		Core needle biopsy		2011-08-18	C50.9	YES	430	C50.9	8500/3	NO	0	YES		17	No	N1a	Stage IIB		TRUE	dba9beec-5e51-48c0-9229-0ee286a02a1a	b5d03f26-66ec-4861-9635-e0ee4a6e41c9	LIVING	45.8	35FFF2A4-7956-47AC-B6B8-1AA6775E332B	Alive	MALE	TUMOR FREE	NA	0	22	No	WHITE	Primary Tumor
TCGA-BH-A0DE-01	TCGA-BH-A0DE		6th	T2	M0	-22656		0.187	948	1130	NA	62		31.1	DiseaseFree	Negative	NOT HISPANIC OR LATINO	Core needle biopsy		2011-08-11	C50.9	YES	140	C50.9	8500/3	NO	0	YES	Post (prior bilateral ovariectomy OR >12 mo since LMP with no prior hysterectomy)	25	No	N0	Stage IIA		TRUE	7f0bbba1-9bc3-45db-bdda-eb3319bb15d2	c73178ad-f042-47ca-af89-343a647076b4	LIVING	31.1	E8EA922D-A851-4D36-B70D-372DE9352548	Alive	FEMALE	TUMOR FREE	NA	0	2	No	WHITE	Primary Tumor
TCGA-BH-A0DG-01	TCGA-BH-A0DG		6th	T2	M0	-11204		0.159	713	972	NA	30		23.4	DiseaseFree	Negative	NOT HISPANIC OR LATINO	Core needle biopsy		2011-08-02	C50.9	YES	1360	C50.9	8500/3	NO	0	YES	Pre (<6 months since LMP AND no prior bilateral ovariectomy AND not on estrogen replacement)	30	No	N0	Stage IIA		TRUE	0bc5744c-5fa3-45bb-87d0-70a02068b392	3f104cf7-8de8-4e77-8baa-bad1bbb493ac	LIVING	23.4	46B16DD0-68E6-4A7A-919B-758219D1E85C	Alive	FEMALE		NA	0	3	No	BLACK OR AFRICAN AMERICAN	Primary Tumor
TCGA-BH-A0DH-01	TCGA-BH-A0DH			T2	M0	-23366		0.23	1156	968	NA	63		38	DiseaseFree	Positive		Core needle biopsy		2010-11-08	C50.9	YES	260	C50.9	8500/3	NO	0		Post (prior bilateral ovariectomy OR >12 mo since LMP with no prior hysterectomy)	37	No	N1a	Stage IIB		TRUE	491b6364-1223-474f-816f-e248c8c841e2	700477dc-5eb4-4efb-a301-12172a7469f7	LIVING	38	79B22278-2BA1-4904-BCA6-2B1368C77475	Alive	FEMALE	TUMOR FREE	NA	3	28	No	WHITE	Primary Tumor
TCGA-BH-A0DI-01	TCGA-BH-A0DI		6th	T2	M0	-23327		0.262	673	267	NA	63		22.1	DiseaseFree	Negative	NOT HISPANIC OR LATINO	Core needle biopsy		2011-08-11	C50.9	YES	200	C50.9	8500/3	NO	0	YES	Post (prior bilateral ovariectomy OR >12 mo since LMP with no prior hysterectomy)	28	No	N1a	Stage IIB		TRUE	27ba717a-5cd8-440a-9345-4ae086f6efca	3f33a14d-7797-4ade-85f7-1dbec18f774f	LIVING	22.1	5B7CE4A4-E1D5-4D0B-B9B4-71B94E32D782	Alive	FEMALE	TUMOR FREE	NA	3	28	No	WHITE	Primary Tumor
TCGA-BH-A0DK-01	TCGA-BH-A0DK			T2	M0	-18237	H-SCORE 260	0.217	423	254	NA	49		13.9	DiseaseFree	Negative		Excisional Biopsy		2010-11-08	C50.9	YES	240	C50.9	8500/3	NO	0		Pre (<6 months since LMP AND no prior bilateral ovariectomy AND not on estrogen replacement)	79	No	N0 (i-)	Stage IIA		TRUE	f2bbfa9d-9a9d-4f46-9fde-378e4c44e2ad	1acae6e0-3100-4de8-a436-e15cdbe1322b	LIVING	13.9	1E3F22FC-3D82-4911-9C97-8CB87A3D131C	Alive	FEMALE	TUMOR FREE	NA	0	3	No	WHITE	Primary Tumor
TCGA-BH-A0DL-01	TCGA-BH-A0DL		6th	T2	M0	-23628		0.261	1467	1074	NA	64		48.2	DiseaseFree	Negative	NOT HISPANIC OR LATINO	Core needle biopsy		2011-08-11	C50.9	YES	350	C50.9	8575/3	NO	0	YES	Post (prior bilateral ovariectomy OR >12 mo since LMP with no prior hysterectomy)	41	No	N0	Stage IIA		TRUE	ba39bfbc-5cac-4f6c-b55c-4eee3466ee93	20308c88-18f2-4373-9e93-1f1d589d97e2	LIVING	48.2	C96287D0-A60B-4BAA-ABA0-8AD4F48662DB	Alive	FEMALE	TUMOR FREE	NA	0	3	No	WHITE	Primary Tumor
TCGA-BH-A0DO-01	TCGA-BH-A0DO		6th	T1c	M0	-28529		0.161	525	454	NA	78		17.3	DiseaseFree	Negative	NOT HISPANIC OR LATINO	Core needle biopsy		2011-08-11	C50.9	YES	80	C50.9	8500/3	NO	0	YES	Post (prior bilateral ovariectomy OR >12 mo since LMP with no prior hysterectomy)	14	No	N0	Stage I		TRUE	d3d4d709-ab34-4617-aa8c-51a3d0a3efe6	8b5d38fb-e9ad-445c-b5d5-f054a5eafeb1	LIVING	17.3	B7F7C44C-9F6C-46D9-A9B7-BB8F09C4DEF6	Alive	FEMALE	TUMOR FREE	NA	0	2	Yes	WHITE	Primary Tumor
TCGA-BH-A0DP-01	TCGA-BH-A0DP			T3	M0	-22199	H-SCORE 280	0.257	476	293	NA	60		15.6	DiseaseFree	Negative		Core needle biopsy		2010-11-09	C50.9	YES	510	C50.9	8520/3	NO	0		Post (prior bilateral ovariectomy OR >12 mo since LMP with no prior hysterectomy)	36	No	N0 (i-)	Stage IIB		TRUE	14267783-5624-4fe5-ba81-9d67f1017474	ffb838b0-db61-4dc9-aadc-41562f677f54	LIVING	15.6	F04188AB-51CE-4AA1-B72C-399BE7863235	Alive	FEMALE	TUMOR FREE	NA	0	4	No	WHITE	Primary Tumor
TCGA-BH-A0DQ-01	TCGA-BH-A0DQ			T2	M0	-15533	H-SCORE 136	0.283	98	190	NA	42		3.22	DiseaseFree	Negative		Core needle biopsy		2010-11-09	C50.9	YES	110	C50.9	8500/3	NO	0		Pre (<6 months since LMP AND no prior bilateral ovariectomy AND not on estrogen replacement)	28	No	N1	Stage IIB		TRUE	a851ca14-7bbf-455b-a054-ec03979a4247	10285a0d-d8cc-4c20-a8a2-8891d9807599	LIVING	3.22	D644B589-A6ED-4DCC-97D4-751E22AE3A7D	Alive	FEMALE	TUMOR FREE	NA	1	25	No	WHITE	Primary Tumor
TCGA-BH-A0DS-01	TCGA-BH-A0DS			T2	M0	-25944	H-SCORE 190	0.34	78	79	NA	71		2.56	DiseaseFree	Negative		Core needle biopsy		2010-11-09	C50.9	YES	200	C50.9	8500/3	NO	0		Post (prior bilateral ovariectomy OR >12 mo since LMP with no prior hysterectomy)	34	No	N2a	Stage IIIA		TRUE	fb57c598-b45b-478a-9d34-ca1f050d5b7c	a99e45da-6933-4300-9c8a-e9d0f9e9c825	LIVING	2.56	E4CBDC29-63E2-4CF0-B02F-16CA9C69F26E	Alive	FEMALE	TUMOR FREE	NA	8	14	No	WHITE	Primary Tumor
TCGA-BH-A0DT-01	TCGA-BH-A0DT		6th	T1c	M0	-15078		0.193	1170	1044	NA	41		38.4	DiseaseFree	Negative		Core needle biopsy		2011-08-11	C50.9	YES	160	C50.9	8500/3	NO	0	YES	Pre (<6 months since LMP AND no prior bilateral ovariectomy AND not on estrogen replacement)	13	No	N1a	Stage IIA		TRUE	74f31744-0aed-4633-beec-4e203315f0b7	eb11d414-2f0e-44a1-843c-ecacc7212e91	LIVING	38.4	C0AFC806-9F96-484F-BF40-89B26ABF8714	Alive	FEMALE	TUMOR FREE	NA	1	18	No	WHITE	Primary Tumor
TCGA-BH-A0DV-01	TCGA-BH-A0DV		6th	T2	M0	-19781		0.008213	1374	975	NA	54		45.1	DiseaseFree	Negative		Core needle biopsy		2011-08-02	C50.9	YES	370	C50.9	8500/3	NO	0	YES	Peri (6-12 months since last menstrual period)	7	No	N2a	Stage IIIA		TRUE	96b9c7db-1be1-4b60-b47c-26b654c3d64c	b4c19f4e-c5bf-4c4f-bad8-9c18128c112d	LIVING	45.1	3A0E1EF6-B234-46EC-BD15-95B5FAB06D45	Alive	FEMALE	TUMOR FREE	NA	9	9	No	WHITE	Primary Tumor
TCGA-BH-A0DX-01	TCGA-BH-A0DX		6th	T1b	M0	-22833		0.2	1442	997	NA	62		47.4	DiseaseFree	Negative	NOT HISPANIC OR LATINO	Core needle biopsy		2011-08-11	C50.9	YES	50	C50.9	8500/3	NO	0	YES	Post (prior bilateral ovariectomy OR >12 mo since LMP with no prior hysterectomy)	55	No	N0	Stage I		TRUE	035cb359-eac3-484a-9e88-3ddc739440a3	7b420e74-ed0d-416b-8355-9a80a61d6a4b	LIVING	47.4	EBAB36DE-A97F-4F8B-806C-EF182519933A	Alive	FEMALE	TUMOR FREE	NA	0	11	No	WHITE	Primary Tumor
TCGA-BH-A0DZ-01	TCGA-BH-A0DZ			T2	M0	-15980	H-SCORE 140	0.213	495	308	NA	43		16.3	DiseaseFree	Negative		Core needle biopsy		2010-11-09	C50.9	YES	170	C50.9	8500/3	NO	0		Pre (<6 months since LMP AND no prior bilateral ovariectomy AND not on estrogen replacement)	196	No	N1a	Stage IIB		TRUE	478eb8aa-50b8-4ce5-98e4-d518ede4b174	6093f268-1c3f-4fec-bde7-fc3721ecaf8e	LIVING	16.3	16DE55CE-076E-43D3-84BD-332A79B95EFD	Alive	FEMALE	TUMOR FREE	NA	1	5	No	WHITE	Primary Tumor
TCGA-BH-A0E0-01	TCGA-BH-A0E0			T3	M0	-14175	H-SCORE 0	0.673	134	136	NA	38		4.4	DiseaseFree	Negative		Core needle biopsy		2010-11-09	C50.9	YES	620	C50.9	8500/3	NO	0		Pre (<6 months since LMP AND no prior bilateral ovariectomy AND not on estrogen replacement)	32	No	N3a	Stage IIIC		TRUE	20e8106b-1290-4735-abe4-7621e08e3dc8	662cc11c-da31-4e31-8e77-46011b38ea96	LIVING	4.4	975989FE-8785-42C1-8551-53661B7B16A1	Alive	FEMALE	TUMOR FREE	NA	10	21	No	WHITE	Primary Tumor
TCGA-BH-A0E1-01	TCGA-BH-A0E1			T2	M0	-19192	H-SCORE 180	0.0595	477	301	NA	52		15.7	DiseaseFree	Negative		Core needle biopsy		2010-11-09	C50.9	YES	990	C50.9	8500/3	NO	0		Peri (6-12 months since last menstrual period)	27	No	N1	Stage IIB		TRUE	606fbc6a-b41b-441d-9401-51e54912bf5e	dcf7829e-abaa-435f-b41d-a2bcfde5d66a	LIVING	15.7	891F4C63-8207-4CB8-AB59-A970CC6F1A1A	Alive	FEMALE	TUMOR FREE	NA	2	17	No	WHITE	Primary Tumor
TCGA-BH-A0E2-01	TCGA-BH-A0E2			T2	M0	-18152	H-SCORE 300	0.284	376	210	NA	49		14.3	DiseaseFree	Negative		Core needle biopsy		2010-11-09	C50.9	YES	160	C50.9	8500/3	NO	0		Pre (<6 months since LMP AND no prior bilateral ovariectomy AND not on estrogen replacement)	33	No	N2a	Stage IIIA		TRUE	8ace3b8c-f23e-48a9-a137-9e046bd9549b	4c70c0b1-1566-4e39-9dec-5050f62cd0a8	LIVING	14.3	29EDE507-90BA-4ABE-B3EF-559EBA4CCD56	Alive	FEMALE	TUMOR FREE	NA	4	26	No	BLACK OR AFRICAN AMERICAN	Primary Tumor
TCGA-BH-A0E6-01	TCGA-BH-A0E6			T1c	M0	-25408	H-SCORE 0	0.617	293	134	NA	69		9.63	DiseaseFree	Negative		Core needle biopsy		2010-11-09	C50.9	YES	80	C50.9	8500/3	NO	0		Post (prior bilateral ovariectomy OR >12 mo since LMP with no prior hysterectomy)	48	No	N0 (i-)	Stage IA		TRUE	6c0066e3-96df-4870-bcd3-98cda64082e9	052e361c-9cf7-4a92-a77d-f3d70f9dec0b	LIVING	9.63	739E1733-3540-4E82-AC91-F511105DABD5	Alive	FEMALE	TUMOR FREE	NA	0	1	No	WHITE	Primary Tumor
TCGA-BH-A0E7-01	TCGA-BH-A0E7			T2	M0	-29115		0.079	1363	1259	NA	79		44.8	DiseaseFree	Negative		Excisional Biopsy		2010-11-09	C50.9	YES	140	C50.9	8500/3	NO	0		Post (prior bilateral ovariectomy OR >12 mo since LMP with no prior hysterectomy)	39	No	N1a	Stage IIB		TRUE	d3b9d925-ae04-4721-8bfc-50b41225bc74	5c031f2a-0e98-4ab4-b8c5-3a296fda419d	LIVING	44.8	CE32A294-10FC-4DBA-A779-FAEEBE677D38	Alive	FEMALE	TUMOR FREE	NA	1	17	No	WHITE	Primary Tumor
TCGA-BH-A0E9-01	TCGA-BH-A0E9		6th	T2	M0	-19415		0.219	1405	1357	NA	53		46.2	DiseaseFree	Negative		Core needle biopsy		2011-08-11	C50.9	YES	480	C50.9	8520/3	NO	0	YES	Post (prior bilateral ovariectomy OR >12 mo since LMP with no prior hysterectomy)	17	No	N1a	Stage IIB		TRUE	76ace6aa-0505-442c-978a-f889cf2d44bb	46f79f16-4d38-4a71-ad9e-24037054966c	LIVING	46.2	A2F30AF4-16EE-4C5B-8D51-E5DFDBF423BC	Alive	FEMALE	TUMOR FREE	NA	3	12	No	WHITE	Primary Tumor
TCGA-BH-A0EA-01	TCGA-BH-A0EA		6th	T1c	M0	-26548		0.0603	NA	567	993	72		NA		Negative	NOT HISPANIC OR LATINO	Core needle biopsy		2011-08-11	C50.9	YES	220	C50.9	8500/3	NO	0	YES	Post (prior bilateral ovariectomy OR >12 mo since LMP with no prior hysterectomy)	21	No	N1a	Stage IIA		TRUE	1f601832-eee3-48fb-acf5-80c4a454f26e	7f791228-dd77-4ab0-8227-d784a4c7fea1	DECEASED	32.6	28231C7B-64EE-49AC-B7AB-9BADDDDCC17C	Dead	FEMALE	TUMOR FREE	NA	2	4	Yes	WHITE	Primary Tumor
TCGA-BH-A0EB-01	TCGA-BH-A0EB			T1c	M0	-25259	H-SCORE 300	0.132	745	552	NA	69		24.5	DiseaseFree	Negative		Core needle biopsy		2010-11-09	C50.9	YES	200	C50.9	8500/3	NO	0		Post (prior bilateral ovariectomy OR >12 mo since LMP with no prior hysterectomy)	32	No	N0 (i-)	Stage IA		TRUE	ec6930e5-2d83-435a-9a57-a2c5c22caf02	7877c9a9-2002-4d6d-9ca4-f200c1ac00e7	LIVING	24.5	C6B0D463-9389-4BAE-93CA-3EE4717D20EC	Alive	FEMALE	TUMOR FREE	NA	0	4	No	WHITE	Primary Tumor
TCGA-BH-A0EE-01	TCGA-BH-A0EE			T3	M0	-24850		0.442	943	946	NA	68		31	DiseaseFree	Negative		Core needle biopsy		2010-11-09	C50.9	YES	890	C50.9	8500/3	NO	0		Post (prior bilateral ovariectomy OR >12 mo since LMP with no prior hysterectomy)	80	No	N0 (i-)	Stage IIB		TRUE	ca76c6fc-ff30-4833-884d-3a94fe53ff17	2ee13ed0-cb80-4375-a329-91ff9904bb7c	LIVING	31	B8664381-386A-44A2-AC3B-D69A4980A8EA	Alive	FEMALE	TUMOR FREE	NA	0	1	No	WHITE	Primary Tumor
TCGA-BH-A0GY-01	TCGA-BH-A0GY			T2	M0	-24493	H-Score 150	0.266	917	745	NA	67		30.3	DiseaseFree	Negative		Core needle biopsy		2010-11-10	C50.9	YES	200	C50.9	8500/3	NO	0		Post (prior bilateral ovariectomy OR >12 mo since LMP with no prior hysterectomy)	38	No	N1	Stage IIA		TRUE	7d9d3522-ec3b-4efe-8c8e-c0e675276ef5	a7e71eac-1768-4fc2-8eba-1576d22e0f43	LIVING	30.3	A997FF30-F112-48BE-8FF1-15F8266A5E62	Alive	FEMALE	TUMOR FREE	NA	3	26	No	WHITE	Primary Tumor
TCGA-BH-A0GZ-01	TCGA-BH-A0GZ			T1c	M0	-22714	H-SCORE 300	0.272	328	206	NA	62		10.8	DiseaseFree	Negative		Core needle biopsy		2010-11-10	C50.9	YES	60	C50.9	8500/3	NO	0		Post (prior bilateral ovariectomy OR >12 mo since LMP with no prior hysterectomy)	28	No	N1a	Stage IIA		TRUE	27dfb9d4-3a2c-44bc-9acf-8f638d3f3004	1142b1cf-ebf3-485b-aae2-dcf4d8793212	LIVING	10.8	C956B4B1-99E6-4823-886A-FA8FCD1E3E4D	Alive	FEMALE	TUMOR FREE	NA	1	14	No	WHITE	Primary Tumor
TCGA-BH-A0H0-01	TCGA-BH-A0H0			T1c	M0	-25223	H-SCORE 190	0.253	461	344	NA	69		15.1	DiseaseFree	Negative		Core needle biopsy		2010-11-10	C50.9	YES	70	C50.9	8500/3	NO	0		Post (prior bilateral ovariectomy OR >12 mo since LMP with no prior hysterectomy)	16	No	N0 (i-)	Stage IA		TRUE	96457ebf-ae88-41f4-97e5-cdc3163418aa	93a3fc8a-1b50-4da3-9dbb-cf9f582fc22e	LIVING	15.1	94CF5704-1BE7-4CCC-870E-FB8527AC47E8	Alive	FEMALE	TUMOR FREE	NA	0	2	No	WHITE	Primary Tumor
TCGA-BH-A0H3-01	TCGA-BH-A0H3		6th	T1c	M0	-17152		0.0606	1149	773	NA	46		37.8	DiseaseFree	Negative	NOT HISPANIC OR LATINO	Core needle biopsy		2011-08-11	C50.9	YES	80	C50.9	8500/3	NO	0	YES	Pre (<6 months since LMP AND no prior bilateral ovariectomy AND not on estrogen replacement)	17	No	N0	Stage I		TRUE	6cdc0d53-f813-4101-81e5-9bee68270536	6f26754e-8132-4612-bf6c-9301302fec2d	LIVING	37.8	6D3F79A6-C55C-497F-9CCD-1C6D3ACE7492	Alive	FEMALE	TUMOR FREE	NA	0	2	No	WHITE	Primary Tumor
TCGA-BH-A0H5-01	TCGA-BH-A0H5		6th	T1c	M0	-16719		1.991e-05	1080	815	NA	45		35.5	DiseaseFree	Negative	NOT HISPANIC OR LATINO	Core needle biopsy		2011-08-12	C50.9	YES	410	C50.9	8500/3	NO	0	YES	Post (prior bilateral ovariectomy OR >12 mo since LMP with no prior hysterectomy)	40	No	N0 (i-)	Stage I		TRUE	cab38ea8-4555-413c-b81e-4621aac4ef85	8cc4fd25-dd8b-4983-ac21-24f3cf3e51cd	LIVING	35.5	C350A3BE-1709-427D-8E1D-E0BBA480A56D	Alive	FEMALE	TUMOR FREE	NA	0	1	No	WHITE	Primary Tumor
TCGA-BH-A0H6-01	TCGA-BH-A0H6			T1b	M0	-30125	H-SCORE 230	0.0982	747	583	NA	82		24.5	DiseaseFree	Negative		Core needle biopsy		2010-11-10	C50.9	YES	330	C50.9	8500/3	NO	0		Post (prior bilateral ovariectomy OR >12 mo since LMP with no prior hysterectomy)	14	No	NX	Stage I		TRUE	aeb6a3a6-b57a-4c53-90e6-e833777dd2a1	b2921c9d-c655-46f3-86e5-2fc2bed1ed33	LIVING	24.5	93292768-8C20-4551-8CA8-44AE0FFB487E	Alive	FEMALE	TUMOR FREE	0	0	0	No	WHITE	Primary Tumor
TCGA-BH-A0H7-01	TCGA-BH-A0H7			T1c	M0	-23972	H-SCORE 255	0.441	702	542	NA	65		23.1	DiseaseFree	Negative		Core needle biopsy		2010-11-10	C50.9	YES	440	C50.9	8500/3	NO	0		Post (prior bilateral ovariectomy OR >12 mo since LMP with no prior hysterectomy)	57	No	N2a	Stage IIIA		TRUE	2021ed1f-dc75-4701-b8b8-1386466e4802	69bfa6ce-ed46-4321-a107-347c49d68951	LIVING	23.1	CC7D1177-1638-4A80-A3AA-266ADC260EC9	Alive	FEMALE	TUMOR FREE	NA	6	16	No	WHITE	Primary Tumor
TCGA-BH-A0H9-01	TCGA-BH-A0H9			T2	M0	-25289		0.307	1247	1088	NA	69		41	DiseaseFree	Negative		Core needle biopsy		2010-11-17	C50.9	YES	120	C50.9	8500/3	NO	0		Post (prior bilateral ovariectomy OR >12 mo since LMP with no prior hysterectomy)	38	No	N0 (i-)	Stage IIA		TRUE	0f64edec-0f1f-4025-8a53-75f9534f7828	4a7c76a9-c3a2-4b57-a57a-de055152dcf8	LIVING	41	584E15EE-1C80-4507-8AD3-558DF06DBDF3	Alive	FEMALE	TUMOR FREE	NA	0	1	No	WHITE	Primary Tumor
TCGA-BH-A0HA-01	TCGA-BH-A0HA		6th	T1c	M0	-11379		0.0838	856	675	NA	31		52.9	DiseaseFree	Negative	NOT HISPANIC OR LATINO	Core needle biopsy		2011-08-02	C50.9	YES	230	C50.9	8500/3	NO	0	YES	Pre (<6 months since LMP AND no prior bilateral ovariectomy AND not on estrogen replacement)	258	No	N0 (i-)	Stage I		TRUE	e666081b-caaf-4e8b-9446-807be71201a5	63baef92-6733-4791-b897-0abe9131a5f5	LIVING	52.9	E6C20D27-63E5-4FFF-96BF-E8BD71296925	Alive	FEMALE	TUMOR FREE	NA	0	4	No	WHITE	Primary Tumor
TCGA-BH-A0HB-01	TCGA-BH-A0HB			T1c	M0	-20448	H-Score 300	0.292	806	739	NA	55		26.5	DiseaseFree	Negative		Core needle biopsy		2010-11-10	C50.9	YES	70	C50.9	8500/3	NO	0		Post (prior bilateral ovariectomy OR >12 mo since LMP with no prior hysterectomy)	30	No	N0 (i-)	Stage IA		TRUE	0c1023c0-d2ce-4940-8047-7642f1dc3965	19193b8f-1e1b-448c-b934-93f25e60d45b	LIVING	26.5	C7476B2B-0040-4013-8D30-06935E3FB897	Alive	FEMALE	TUMOR FREE	NA	0	2	No	WHITE	Primary Tumor
TCGA-BH-A0HI-01	TCGA-BH-A0HI			T1c	M0	-28644	H-Score 240	0.0729	620	554	NA	78		20.4	DiseaseFree	Negative		Core needle biopsy		2010-11-10	C50.9	YES	20	C50.9	8500/3	NO	0		Post (prior bilateral ovariectomy OR >12 mo since LMP with no prior hysterectomy)	27	No	N0 (i-)	Stage IA		TRUE	e0375a8b-a135-4103-a59d-39063fcf4a6f	838f924a-989c-4642-ba15-d711df6ccb37	LIVING	20.4	EE9E0908-05D2-4F26-B3C2-2B40A48FEA6D	Alive	FEMALE	TUMOR FREE	0	0	1	No	WHITE	Primary Tumor
TCGA-BH-A0HK-01	TCGA-BH-A0HK			T2	M0	-29751	H-SCORE 260	0.0924	178	35	NA	81		5.85	DiseaseFree	Negative		Core needle biopsy		2010-11-10	C50.9	YES	700	C50.9	8522/3	NO	0		Post (prior bilateral ovariectomy OR >12 mo since LMP with no prior hysterectomy)	89	No	N1	Stage IIB		TRUE	24334ac1-28a3-4b61-b590-3f51e375b247	8835b20e-9343-4266-a356-e0343c657130	LIVING	5.85	575F2EFD-2D8B-4140-9FCB-D8CB9EC14D09	Alive	FEMALE	TUMOR FREE	NA	2	17	No	WHITE	Primary Tumor
TCGA-BH-A0HO-01	TCGA-BH-A0HO			T1c	M0	-17710	H-Score 200	0.0493	76	224	NA	48		2.5	DiseaseFree	Negative		Core needle biopsy		2010-11-11	C50.9	YES	110	C50.9	8500/3	NO	0		Pre (<6 months since LMP AND no prior bilateral ovariectomy AND not on estrogen replacement)	19	No	N1a	Stage IIA		TRUE	8332806e-f547-4aae-89af-6d5bec831fd2	02c8bf84-4816-49a9-b5d1-0edebb8627c7	LIVING	2.5	C9AD69EB-506A-4442-B1C2-C8F09B519CB2	Alive	FEMALE	TUMOR FREE	1	1	18	No	WHITE	Primary Tumor
TCGA-BH-A0HP-01	TCGA-BH-A0HP			T3	M0	-23883	H-Score 280	0.177	414	346	NA	65		13.6	DiseaseFree	Negative		Core needle biopsy		2010-11-11	C50.9	YES	720	C50.9	8520/3	NO	0		Post (prior bilateral ovariectomy OR >12 mo since LMP with no prior hysterectomy)	217	No	N2a	Stage IIIA		TRUE	fcef8cb5-fb2c-4bfb-82cd-6b9f3145182c	c1e94fa4-ace1-4ee2-9cdc-ec7b13e6bc8a	LIVING	13.6	F13CE7B3-F275-4EEE-90A3-11B8B92FA431	Alive	FEMALE	TUMOR FREE	NA	8	17	No	WHITE	Primary Tumor
TCGA-BH-A0HQ-01	TCGA-BH-A0HQ			T2	M0	-20719		0.128	1121	962	NA	56		36.8	DiseaseFree	Negative		Core needle biopsy		2010-11-11	C50.9	YES	110	C50.9	8500/3	NO	0		Post (prior bilateral ovariectomy OR >12 mo since LMP with no prior hysterectomy)	30	No	N0 (i+)	Stage IIA		TRUE	f31c21b6-0f7f-435b-9e24-97c909755c36	ef48e806-e31c-4a11-afe8-dcc232357329	LIVING	36.8	A76A272F-675E-4E56-8761-96B71419A012	Alive	FEMALE	TUMOR FREE	NA	0	4	No	WHITE	Primary Tumor
TCGA-BH-A0HU-01	TCGA-BH-A0HU			T1c	M0	-19216	H-Score 140	0.392	392	394	NA	52		12.9	DiseaseFree	Negative		Core needle biopsy		2010-11-11	C50.9	YES	140	C50.9	8500/3	NO	0		Peri (6-12 months since last menstrual period)	35	No	N0 (i-)	Stage IA		TRUE	dc657ca8-98e8-4ec4-a513-1b848be0e85d	ba869eea-6e25-4afb-a0ad-73fda57a1d88	LIVING	12.9	1F35A542-2795-4B1F-A846-7097B442C2D9	Alive	FEMALE	TUMOR FREE	NA	0	1	No	WHITE	Primary Tumor
TCGA-BH-A0HW-01	TCGA-BH-A0HW			T1c	M0	-22962		0.23	1561	1591	NA	62		51.3	DiseaseFree	Negative		Core needle biopsy		2010-11-11	C50.9	YES	200	C50.9	8500/3	NO	0		Post (prior bilateral ovariectomy OR >12 mo since LMP with no prior hysterectomy)	33	No	N0 (i-)	Stage IA		TRUE	29fdc464-f216-4828-b456-829f71436e27	f76e87a9-4a50-48b4-9527-eac98c38800e	LIVING	51.3	8AC7EF1D-53EB-466B-9C45-A6A7E9DB9CCD	Alive	FEMALE	TUMOR FREE	NA	0	2	No	ASIAN	Primary Tumor
TCGA-BH-A0HX-01	TCGA-BH-A0HX			T2	M0	-19900	H-Score 270	0.568	829	672	NA	54		27.2	DiseaseFree	Negative		Core needle biopsy		2010-11-11	C50.9	YES	190	C50.9	8500/3	NO	0		Post (prior bilateral ovariectomy OR >12 mo since LMP with no prior hysterectomy)	48	No	N1a	Stage IIB		TRUE	3b01d064-8c00-4972-9f07-407eac8e7534	989c2df5-5183-4daa-a8da-fc9ab18a437c	LIVING	27.2	8C4FEB77-99B6-4C73-9751-508953A874DC	Alive	FEMALE	TUMOR FREE	2	2	24	No	WHITE	Primary Tumor
TCGA-BH-A0HY-01	TCGA-BH-A0HY		6th	T1c	M0	-22179		0.63	868	470	NA	60		50.8	DiseaseFree	Negative	NOT HISPANIC OR LATINO	Core needle biopsy		2011-08-02	C50.9	YES	150	C50.9	8500/3	NO	0	YES	Post (prior bilateral ovariectomy OR >12 mo since LMP with no prior hysterectomy)	47	No	N0	Stage I		TRUE	844ad251-3ee4-42f6-ad00-59a7a1670eea	38ac0df0-950e-4c55-9f8a-96fd3f837ee6	LIVING	50.8	E57B4989-102F-44FD-8FB2-0627143FA904	Alive	FEMALE	TUMOR FREE	NA	0	3	No	WHITE	Primary Tumor
TCGA-BH-A0RX-01	TCGA-BH-A0RX			T2	M0	-21857	H-Score 0	0.095	170	63	NA	59		5.58	DiseaseFree	Negative		Core needle biopsy		2010-11-11	C50.9	YES	170	C50.9	8500/3	NO	0		Post (prior bilateral ovariectomy OR >12 mo since LMP with no prior hysterectomy)	23	No	N0 (i-)	Stage IIA		TRUE	e828455d-4680-41b2-8a1c-1582e3790d62	b9c728ca-9ff2-4aa4-bd9d-6cb69a8d7e2c	LIVING	5.58	57359A9F-7E5A-4599-918C-A95DCF0D9479	Alive	FEMALE	TUMOR FREE	NA	0	3	No	WHITE	Primary Tumor
TCGA-BH-A0W3-01	TCGA-BH-A0W3		7th	T1c	M0	-21369		0.133	180	85	NA	58		23.9	DiseaseFree		NOT HISPANIC OR LATINO	Core needle biopsy		2011-02-14	C50.9	YES	120	C50.9	8500/3	NO	0		Indeterminate (neither Pre or Postmenopausal)	14	No	N1a	Stage IIA		TRUE	3c612e12-6de8-44fa-a095-805c45474821	9ad80473-9148-45a7-ad6d-9936a899e022	LIVING	23.9	801A4E2F-E26E-424F-BF42-CD0D9CD62BCE	Alive	FEMALE	TUMOR FREE	1	1	4	No	WHITE	Primary Tumor
TCGA-BH-A0W4-01	TCGA-BH-A0W4		7th	T2	M0	-16911		0.0207	175	119	NA	46		24.9	DiseaseFree		NOT HISPANIC OR LATINO	Core needle biopsy		2011-02-15	C50.9	YES	170	C50.9	8500/3	NO	0			33	No	N0 (i-)	Stage IIA		TRUE	0772cdbe-8b0d-452b-8df1-bd70d1306363	5a800052-150a-4273-9d5d-0ce48be4fd8a	LIVING	24.9	0C158269-A420-4E71-9E59-8775FB26084B	Alive	FEMALE	TUMOR FREE	NA	NA	3	No	WHITE	Primary Tumor
TCGA-BH-A0W5-01	TCGA-BH-A0W5		6th	T1c	M0	-28304		0.0719	543	906	NA	77		42.3	DiseaseFree	Negative	NOT HISPANIC OR LATINO	Core needle biopsy		2011-02-15	C50.9	YES	80	C50.9	8500/3	NO	0			21	No	N1a	Stage IIA		TRUE	da9c10ea-c13f-4d88-8b94-a0cbc106d036	050e66bb-438a-49d5-a005-7967a006b3f0	LIVING	42.3	60F59595-928B-43BB-978F-9E5B48539EFA	Alive	FEMALE	TUMOR FREE	1	1	11	No	WHITE	Primary Tumor
TCGA-BH-A0W7-01	TCGA-BH-A0W7		6th	T1c	M0	-17996		0.305	558	869	NA	49		44.8	DiseaseFree	Negative	NOT HISPANIC OR LATINO	Core needle biopsy		2011-02-15	C50.9	YES	80	C50.9	8500/3	NO	0			131	No	N0 (i-)	Stage I		TRUE	9f80649b-a249-4fb5-97ad-059a30e13fea	e61873d5-bfd2-4fcc-9f9e-ca80779d36b7	LIVING	44.8	DCDEE014-3447-4DA3-A14F-48C6AED053D2	Alive	FEMALE	TUMOR FREE	0	0	2	No	WHITE	Primary Tumor
TCGA-BH-A0WA-01	TCGA-BH-A0WA		6th	T1c	M0	-30025		0.606	372	724	NA	82		23	DiseaseFree	Negative	NOT HISPANIC OR LATINO	Fine needle aspiration biopsy		2011-02-16	C50.9	YES	80	C50.9	8575/3	NO	0			77	No	N0 (i-)	Stage I		TRUE	786e8dbe-442e-4551-87b3-b4c333b04dd4	8ef7ad6f-a6e4-405c-b20e-d547985bd9d6	LIVING	23	87E28DAE-5012-4A16-BE27-A9F0F3F30F5B	Alive	FEMALE	TUMOR FREE	NA	0	3	No	WHITE	Primary Tumor
TCGA-BH-A18F-01	TCGA-BH-A18F		7th	T2	M0	-18594		0.228	268	114	NA	50		8.8	DiseaseFree	Negative	NOT HISPANIC OR LATINO	Core needle biopsy		2011-06-01	C50.9	YES	200	C50.9	8500/3	NO	0	YES	Peri (6-12 months since last menstrual period)	40	No	N0	Stage IIA		TRUE	bfd49783-1767-469b-9d79-7822301c5efc	adbf4056-e7d4-4282-8771-f2d6029386ab	LIVING	8.8	771497E1-473E-421A-A149-CFA58E95B728	Alive	FEMALE	TUMOR FREE	NA	0	1	No	WHITE	Primary Tumor
TCGA-BH-A18G-01	TCGA-BH-A18G			T1c	M0	-29820		0.071	61	78	NA	81		2	DiseaseFree	Negative	NOT HISPANIC OR LATINO	Core needle biopsy		2011-06-01	C50.5	YES	100	C50.5	8500/3	NO	0	YES	Post (prior bilateral ovariectomy OR >12 mo since LMP with no prior hysterectomy)	1131	No	N0	Stage IA		TRUE	747083ff-0703-431b-aad4-f2adff739516	3b999df5-526b-4270-a29d-a627eb64c727	LIVING	2	7C92F144-4A84-4D9E-8A35-C059FD082150	Alive	FEMALE		NA	0	3	No	WHITE	Primary Tumor
TCGA-BH-A18H-01	TCGA-BH-A18H		7th	T1b	M0	-23065		0.263	0	16	NA	63		0	DiseaseFree	Negative	NOT HISPANIC OR LATINO	Core needle biopsy		2011-06-06	C50.9	YES	80	C50.9	8500/3	NO	0	YES	Post (prior bilateral ovariectomy OR >12 mo since LMP with no prior hysterectomy)	31	No	N0	Stage IA		TRUE	878f975b-94fd-4d69-b7e7-1ed3ac2ee438	9321161b-d568-4d38-aed3-956786a06329	LIVING	0	DF536409-601F-489B-9F8A-A2B372BF9999	Alive	FEMALE		NA	0	2	No	WHITE	Primary Tumor
TCGA-BH-A18I-01	TCGA-BH-A18I		7th	T1c	cM0 (i+)	-19489		0.146	220	80	NA	53		7.23	DiseaseFree	Positive	NOT HISPANIC OR LATINO	Core needle biopsy		2011-06-07	C50.2	YES	100	C50.2	8500/3	NO	0	YES	Post (prior bilateral ovariectomy OR >12 mo since LMP with no prior hysterectomy)	25	No	N1a	Stage IIA		TRUE	9c1ceb7d-6fed-4c2f-a89a-bf3c5b15ca58	f7622b8a-b57c-42f0-bad1-c85edd41f034	LIVING	7.23	01E8D241-C303-47FA-B484-B800D580B34C	Alive	FEMALE	TUMOR FREE	1	1	3	No	WHITE	Primary Tumor
TCGA-BH-A18J-01	TCGA-BH-A18J		5th	T4b	M1	-20678		0.236	NA	3948	612	56		NA		Negative	NOT HISPANIC OR LATINO			2011-06-08	C50.9	YES	640	C50.9	8500/3	NO	0			56	No	N2	Stage IV		TRUE	cc074b7f-d3b2-4880-902e-bf10e667b665	044f9b74-9a16-432e-acac-78c399c001bc	DECEASED	20.1	589BC4DD-0079-4106-A2E6-9A48E9BD7DE2	Dead	FEMALE	WITH TUMOR	NA	NA	NA	No	WHITE	Primary Tumor
TCGA-BH-A18K-01	TCGA-BH-A18K		5th	T1	M0	-16824		0.427	NA	4011	2763	46		NA		Negative	NOT HISPANIC OR LATINO	Core needle biopsy		2011-06-09	C50.9	YES	100	C50.9	8500/3	NO	0	YES		34	No	N0	Stage I		TRUE	50619f8c-10aa-464a-a227-90a7aa6ffd43	db1c378a-1974-4b79-a027-928cba385e40	DECEASED	90.8	EEB515A4-4AF3-475B-B6C0-A6134C96480A	Dead	FEMALE	WITH TUMOR	NA	0	11	No	WHITE	Primary Tumor
TCGA-BH-A18L-01	TCGA-BH-A18L		6th	T3	M0	-18519		0.581	NA	2669	811	50		NA		Negative	NOT HISPANIC OR LATINO	Core needle biopsy		2011-06-09	C50.9	YES	260	C50.9	8500/3	NO	0	YES		31	No	N1mi	Stage IIIA		TRUE	9ddc3e7b-8b54-4a83-8335-8053940f56c1	796e565c-3841-425a-bdfb-569776d7c9ac	DECEASED	26.6	E4DF4771-074D-4870-A0BF-AF62724C5A86	Dead	FEMALE		1	1	3	No	WHITE	Primary Tumor
TCGA-BH-A18M-01	TCGA-BH-A18M		5th	T3	M0	-14532		0.177	NA	3629	2207	39		NA		Negative	NOT HISPANIC OR LATINO	Core needle biopsy		2011-06-15	C50.3	YES	360	C50.3	8500/3	NO	0	YES		14	No	N1	Stage IIIA		TRUE	f63722c1-a0bb-4bf9-8a10-1d76a8e1a0ba	6a914b5f-5bc2-4152-b80e-fcc864a415b0	DECEASED	72.5	4F67B7BE-68C1-40E1-8276-2D26B46C744D	Dead	FEMALE		4	4	6	No	WHITE	Primary Tumor
TCGA-BH-A18N-01	TCGA-BH-A18N			T2	M0	-32404		0.14	NA	3374	1148	88		NA		Negative	NOT HISPANIC OR LATINO	Fine needle aspiration biopsy		2011-06-15	C50.9	YES	350	C50.9	8500/3	NO	0	YES		30	No	N1b	Stage IIA		TRUE	665dd3d3-779c-4abd-b5d7-13342340451d	dba36215-670e-400f-864e-a46702d49240	DECEASED	37.7	60E8A9CF-3E2D-4E36-947D-448BA27C6561	Dead	FEMALE		2	2	26	No	WHITE	Primary Tumor
TCGA-BH-A18P-01	TCGA-BH-A18P		6th	T1	M0	-22222		0.167	NA	2639	921	60		NA		Negative		Fine needle aspiration biopsy		2011-06-22	C50.3	YES	230	C50.3	8500/3	NO	0	YES		240	No	N0	Stage I		TRUE	557cb0a3-6f1b-4faf-8296-0a15c24158f9	0d0546ad-8a51-4802-a173-96fbe5ebb124	DECEASED	30.3	D24BB508-6E9A-4CF7-93C6-975E79F6E86D	Dead	FEMALE	WITH TUMOR	NA	0	2	No	WHITE	Primary Tumor
TCGA-BH-A18Q-01	TCGA-BH-A18Q			T2	M0	-20675		0.74	NA	3417	1692	56		NA		Negative	NOT HISPANIC OR LATINO	Core needle biopsy		2011-06-24	C50.8	YES	130	C50.8	8500/3	NO	0	YES		65	No	N1b	Stage IIB		TRUE	db4bc6aa-2e7d-4bcb-8519-a455f624d33b	f225775e-e46f-4d1d-8b13-042e9776dd72	DECEASED	55.6	BB4C7377-F10C-48D2-A8AA-6D5B43FEB108	Dead	FEMALE		2	2	25	No	WHITE	Primary Tumor
TCGA-BH-A18R-01	TCGA-BH-A18R			T2b	M0	-18524		0.287	NA	3571	1142	50		NA		Negative	NOT HISPANIC OR LATINO	Incisional Biopsy		2011-07-03	C50.9	YES	250	C50.9	8500/3	NO	0	YES		21	No	N1	Stage IIA		TRUE	f6e1ec78-5ad9-4879-9b7e-262d17b166ad	518be2c7-fba5-47b1-8c8b-fef812fa74a4	DECEASED	37.5	46DE21ED-1E08-4095-9B68-88D10AC74673	Dead	FEMALE	TUMOR FREE	NA	10	15	No	WHITE	Primary Tumor
TCGA-BH-A18S-01	TCGA-BH-A18S		6th	T1c	M0	-28974		0.152	NA	2695	2009	79		NA		Negative	NOT HISPANIC OR LATINO	Core needle biopsy		2011-07-02	C50.3	YES	320	C50.3	8523/3	NO	0	YES	Post (prior bilateral ovariectomy OR >12 mo since LMP with no prior hysterectomy)	18	No	N0	Stage I		TRUE	433427a1-bacf-4381-91ba-5fec8a0953f9	ce3a4469-8d19-4661-9c48-1baf6e84f49c	DECEASED	66	E89670CB-575A-4B67-AF79-1C730B9B86D4	Dead	FEMALE	TUMOR FREE	NA	0	2	No	WHITE	Primary Tumor
TCGA-BH-A18T-01	TCGA-BH-A18T		6th	T2	M0	-25674		0.665	NA	2737	224	70		NA		Negative	NOT HISPANIC OR LATINO	Fine needle aspiration biopsy		2011-07-02	C50.9	YES	210	C50.9	8500/3	NO	0		Post (prior bilateral ovariectomy OR >12 mo since LMP with no prior hysterectomy)	53	No	N0	Stage IIA		TRUE	30ec8b1f-28c4-4f46-8a1b-a8d51e558c7d	50233285-5aef-412a-a225-3ed14eaa69d8	DECEASED	7.36	B8FF655E-47AB-4BB0-B119-1402A335126A	Dead	FEMALE	WITH TUMOR	NA	NA	NA	No	WHITE	Primary Tumor
TCGA-BH-A18U-01	TCGA-BH-A18U		6th	T2	M0	-26426		0.618	NA	2697	1563	72		NA		Negative	NOT HISPANIC OR LATINO	Core needle biopsy		2011-07-02	C50.4	YES	530	C50.4	8500/3	NO	0	YES	Post (prior bilateral ovariectomy OR >12 mo since LMP with no prior hysterectomy)	73	No	N2a	Stage IIIA		TRUE	233b02f3-c4f0-4a67-9db5-e68d5cdaccb6	79763193-268d-49e7-b94c-5cb95f7271b6	DECEASED	51.4	2616F70D-3E15-45BA-8907-65694595F726	Dead	FEMALE	TUMOR FREE	NA	9	16	No	WHITE	Primary Tumor
TCGA-BH-A18V-01	TCGA-BH-A18V		5th	T2	M0	-17682		0.702	NA	3621	1556	48		NA		Negative	NOT HISPANIC OR LATINO	Core needle biopsy		2011-07-02	C50.4	YES	300	C50.4	8500/3	NO	0	YES		149	No	N1b	Stage IIB		TRUE	6b960b58-28e1-41c6-bd6e-7e669c6aa4ef	2923c735-34a1-4db6-a248-1c5de2241dd4	DECEASED	51.1	3C1C2CED-A1CF-48FC-BCB2-658D74E1982B	Dead	FEMALE		NA	0	25	No	WHITE	Primary Tumor
TCGA-BH-A1EN-01	TCGA-BH-A1EN		5th	T2	M0	-28724		0.627	NA	4343	2053	78		NA		Negative	NOT HISPANIC OR LATINO	Excisional Biopsy		2011-09-03	C50.9	YES	140	C50.9	8490/3	NO	0		Post (prior bilateral ovariectomy OR >12 mo since LMP with no prior hysterectomy)	42	No	NX	Stage IIA		TRUE	858652b8-c4c2-41d8-be32-fdc88e1a7bb0	bea52276-596c-479e-981d-ca9132742098	DECEASED	67.4	809F294F-8C48-4719-866B-7169FB1CE24D	Dead	FEMALE	TUMOR FREE	NA	NA	NA	No	WHITE	Primary Tumor
TCGA-BH-A1EO-01	TCGA-BH-A1EO		5th	T1c	M0	-25136		0.262	NA	4330	2798	68		NA			NOT HISPANIC OR LATINO	Excisional Biopsy		2011-09-06	C50.9	YES	100	C50.9	8522/3	NO	0	YES	Post (prior bilateral ovariectomy OR >12 mo since LMP with no prior hysterectomy)	33	No	N1	Stage IIA		TRUE	4510295e-8aa7-4ef1-b2b7-91cc902f8200	9d501ca9-f50d-45fc-bcc3-fee15f9771cd	DECEASED	91.9	A2B755DD-00C4-4349-8E11-C1196EBC91D3	Dead	FEMALE	TUMOR FREE	NA	1	15	No	WHITE	Primary Tumor
TCGA-BH-A1ES-01	TCGA-BH-A1ES		5th	T2	M0	-13138		0.231	NA	4242	3462	35		NA			NOT HISPANIC OR LATINO	Tumor resection		2011-09-06	C50.9	YES	220	C50.9	8500/3	NO	0	YES	Pre (<6 months since LMP AND no prior bilateral ovariectomy AND not on estrogen replacement)	17	No	N1a	Stage IIB		TRUE	51ccbf1b-7cae-44ba-991a-11eda8b8c404	aa1037f4-1414-4e05-b11a-c558a23b7e62	DECEASED	114	9B2253AB-2C41-4E7A-9178-B690FFD9FF78	Dead	FEMALE	WITH TUMOR	NA	1	4	No	WHITE	Primary Tumor
TCGA-BH-A1ET-01	TCGA-BH-A1ET		5th	T1	M0	-20425		0.0892	NA	4137	2520	55		NA			NOT HISPANIC OR LATINO	Fine needle aspiration biopsy		2011-09-07	C50.9	YES	590	C50.9	8500/3	NO	0	YES		20	No	N0	Stage I		TRUE	8986a141-eae7-4157-b695-02cc6fc3b071	2190d984-3941-41d4-b6de-d0aa76f3570d	DECEASED	82.8	E66D3DF8-1605-4EFD-AAFA-74F82366FD16	Dead	FEMALE	TUMOR FREE	NA	1	19	No	WHITE	Primary Tumor
TCGA-BH-A1EU-01	TCGA-BH-A1EU		5th	T1	M0	-30339		0.118	NA	4106	1286	83		NA			NOT HISPANIC OR LATINO	Fine needle aspiration biopsy		2011-09-07	C50.9	YES	410	C50.9	8500/3	NO	0	NO	Post (prior bilateral ovariectomy OR >12 mo since LMP with no prior hysterectomy)	16	No	N0	Stage I		TRUE	a1093598-d3a8-4ffe-83fc-bc7d1faff7e5	73af0f78-cc37-43ff-8f46-524a9ba80eda	DECEASED	42.3	FF6BC87F-029E-4565-A35A-6FB968F8EABA	Dead	FEMALE	TUMOR FREE	NA	NA	NA	No	WHITE	Primary Tumor
TCGA-BH-A1EV-01	TCGA-BH-A1EV		5th	T3	M0	-16504		0.419	NA	4103	365	45		NA			NOT HISPANIC OR LATINO	Fine needle aspiration biopsy		2011-09-07	C50.9	YES	600	C50.9	8500/3	NO	0	YES		76	No	N1b	Stage IIIA		TRUE	417dea5f-f68e-4dab-940e-43ae8c67e5e6	29ac24fb-0065-47f8-b044-f4a66fad2394	DECEASED	12	16DEA43F-4A61-44E3-854F-6B6575B45628	Dead	FEMALE	WITH TUMOR	NA	3	10	No	WHITE	Primary Tumor
TCGA-BH-A1EW-01	TCGA-BH-A1EW		5th	T2	M0	-14090		0.345	NA	4230	1694	38		NA			NOT HISPANIC OR LATINO	Core needle biopsy		2011-09-07	C50.9	YES	550	C50.9	8500/3	NO	0	YES	Pre (<6 months since LMP AND no prior bilateral ovariectomy AND not on estrogen replacement)	12	No	N1b	Stage IIA		TRUE	9d166970-07c8-4ca3-9cfa-ed0049df9ecc	50463a25-4292-4bc7-926a-341493e68242	DECEASED	55.6	56EFCA58-2328-4C5C-9618-981447E76B12	Dead	FEMALE	WITH TUMOR	NA	1	16	No	WHITE	Primary Tumor
TCGA-BH-A1EX-01	TCGA-BH-A1EX		5th	T2	M0	-24544		0.226	NA	3752	1508	67		NA			NOT HISPANIC OR LATINO	Core needle biopsy		2011-09-07	C50.9	YES	200	C50.9	8500/3	NO	0	YES	Post (prior bilateral ovariectomy OR >12 mo since LMP with no prior hysterectomy)	20	No	N1b	Stage IIB		TRUE	7b892055-c59d-4550-8688-ad039790af3d	f713031b-b8ee-4195-91b1-ac9cf63d76a4	DECEASED	49.5	FA86A743-EA67-4554-ABA2-BB8C1DBDB0B1	Dead	FEMALE	WITH TUMOR	NA	2	24	No	WHITE	Primary Tumor
TCGA-BH-A1EY-01	TCGA-BH-A1EY		5th	T2	M0	-28940		0.363	NA	3840	538	79		NA			NOT HISPANIC OR LATINO	Core needle biopsy		2011-09-07	C50.9	YES	290	C50.9	8500/3	NO	0	YES	Post (prior bilateral ovariectomy OR >12 mo since LMP with no prior hysterectomy)	34	No	N0	Stage IIA		TRUE	0741b5db-4405-42ba-b63a-c6ee4f341480	14193a12-5601-4f0c-90aa-ecd24d6ac41b	DECEASED	17.7	2ED10396-96FF-4705-93AE-82FB9A80EC28	Dead	FEMALE	WITH TUMOR	NA	0	12	No	WHITE	Primary Tumor
TCGA-BH-A1F0-01	TCGA-BH-A1F0		5th	T1a	M0	-29335		0.0288	NA	3879	785	80		NA			NOT HISPANIC OR LATINO	Fine needle aspiration biopsy		2011-09-07	C50.9	YES	180	C50.4	8500/3	NO	0	YES	Post (prior bilateral ovariectomy OR >12 mo since LMP with no prior hysterectomy)	26	No	N1c	Stage IIA		TRUE	21ef1730-e5a7-47ce-b419-d000bb59ae15	f754aa5f-49c8-4e8b-a1fe-f370f807499a	DECEASED	25.8	E2EE2397-0F8A-4A71-9B3C-0007F7D00500	Dead	FEMALE	WITH TUMOR	NA	1	9	No	WHITE	Primary Tumor
TCGA-BH-A1F2-01	TCGA-BH-A1F2		5th	T4b	M0	-19701		0.471	NA	4147	959	53		NA			NOT HISPANIC OR LATINO	Core needle biopsy		2011-09-07	C50.9	YES	230	C50.9	8541/3	NO	0	YES		42	No	N1b	Stage IIIB		TRUE	6a2972e3-cca9-47e5-aac0-b770f2399eeb	e5c171ac-f700-439c-9e44-6cfed2c9cea7	DECEASED	31.5	FA781D93-C180-4453-BF95-B2D01B6CDB5C	Dead	FEMALE	TUMOR FREE	NA	6	19	No	WHITE	Primary Tumor
TCGA-BH-A1F5-01	TCGA-BH-A1F5		5th	T1c	M0	-22842		0.146	NA	3091	2712	62		NA			NOT HISPANIC OR LATINO	Core needle biopsy		2011-09-07	C50.9	YES	120	C50.9	8500/3	NO	0	YES		28	No	N1a	Stage IIA		TRUE	e663954c-05a8-479a-a623-400c1eb5efc6	5cd62b0e-902e-492c-843d-5d8aa6964dc5	DECEASED	89.1	F70DE761-F081-4F4C-AD22-9A166CF78CA8	Dead	FEMALE	TUMOR FREE	NA	1	4	Yes	WHITE	Primary Tumor
TCGA-BH-A1F6-01	TCGA-BH-A1F6			T4d	MX	-18691		0.579	NA	5230	2965	51		NA			NOT HISPANIC OR LATINO	Core needle biopsy		2011-09-07	C50.9	YES	360	C50.9	8500/3	NO	0	YES		50	No	N2a			TRUE	ad18820b-a804-49c0-ba8a-86c09fa6bce2	e5a9fa79-2d0f-4cda-9fea-baab86f78b8e	DECEASED	97.4	7E9B0BE7-121E-423F-AA37-445BA922FC13	Dead	FEMALE		NA	6	6	No	WHITE	Primary Tumor
TCGA-BH-A1F8-01	TCGA-BH-A1F8		5th	T4b	M0	-32871		0.997	NA	4301	749	90		NA			NOT HISPANIC OR LATINO	Core needle biopsy		2011-09-07	C50.9	YES	90	C50.9	8500/3	NO	0	YES	Post (prior bilateral ovariectomy OR >12 mo since LMP with no prior hysterectomy)	117	No	N2	Stage IIIB		TRUE	ee554215-bea2-4268-aaf9-784e68cdb969	7e598a8a-9fb8-4c2d-94e7-ae1921addcd1	DECEASED	24.6	BAA6AA92-69C5-454B-A550-246E7DB1EBE3	Dead	FEMALE	WITH TUMOR	NA	12	13	No	WHITE	Primary Tumor
TCGA-BH-A1FB-01	TCGA-BH-A1FB		5th	T2	M0	-21933		0.0542	NA	3871	3669	60		NA			NOT HISPANIC OR LATINO	Core needle biopsy		2011-09-07	C50.9	YES	280	C50.9	8500/3	NO	0	YES	Post (prior bilateral ovariectomy OR >12 mo since LMP with no prior hysterectomy)	NA	No	N1b	Stage IIB		TRUE	ecab16bc-28d5-4c3a-8735-3c785bd047c4	1fc22273-7e02-4193-9fbb-476e0eab6afb	DECEASED	121	C5D116FF-3193-48A0-B69C-D98831D9976A	Dead	FEMALE	WITH TUMOR	NA	0	15	No	WHITE	Primary Tumor
TCGA-BH-A1FC-01	TCGA-BH-A1FC		5th	T1c	M0	-28706		0.468	NA	4456	3472	78		NA			NOT HISPANIC OR LATINO	Fine needle aspiration biopsy		2011-09-08	C50.9	YES	90	C50.9	8510/3	NO	0	YES	Post (prior bilateral ovariectomy OR >12 mo since LMP with no prior hysterectomy)	84	No	N1b	Stage IIA		TRUE	b97bf89a-7a85-4eef-ae7e-f787aead1f0a	3ad0093a-e57a-450a-b0ef-942c9b67a586	DECEASED	114	7B1B31D2-0CC5-4EE6-8AF3-16DF726BE13F	Dead	FEMALE	TUMOR FREE	NA	1	23	No	BLACK OR AFRICAN AMERICAN	Primary Tumor
TCGA-BH-A1FD-01	TCGA-BH-A1FD		5th	T1c	M0	-24940		0.439	NA	4420	1009	68		NA			NOT HISPANIC OR LATINO	Core needle biopsy		2011-09-08	C50.9	YES	120	C50.9	8500/3	NO	0	YES	Post (prior bilateral ovariectomy OR >12 mo since LMP with no prior hysterectomy)	26	No	N0	Stage I		TRUE	3c8b5af9-c34d-43c2-b8c9-39ea11e44fa6	a0e467f8-79c1-499e-b881-669b4bd55b8c	DECEASED	33.1	9F838476-4DF1-44D6-989F-33A1D490424B	Dead	FEMALE	WITH TUMOR	NA	0	19	No	WHITE	Primary Tumor
TCGA-BH-A1FE-01	TCGA-BH-A1FE		5th	T2	M0	-11650		0.13	NA	4456	2273	31		NA			NOT HISPANIC OR LATINO	Core needle biopsy		2011-09-08	C50.9	YES	130	C50.9	8500/3	NO	0	YES		21	No	N1	Stage IIB		TRUE	4aa68586-6331-4795-b40c-859386640df6	3de73049-e6e7-4ed7-be98-bf174fd37c89	DECEASED	74.7	098BAFB4-94D0-4FC8-B938-D8A410BD8FC1	Dead	FEMALE	WITH TUMOR	NA	1	12	No	WHITE	Primary Tumor
TCGA-BH-A1FG-01	TCGA-BH-A1FG		5th	T1c	M0	-32295		0.116	NA	4460	3738	88		NA			NOT HISPANIC OR LATINO	Excisional Biopsy		2011-09-08	C50.9	YES	120	C50.9	8500/3	NO	0		Post (prior bilateral ovariectomy OR >12 mo since LMP with no prior hysterectomy)	16	No	NX	Stage I		TRUE	d4e7426c-9739-4585-9114-e564b13c7c02	33f49b4e-924e-4590-8afa-e17403602137	DECEASED	123	49927626-EB84-4A79-8073-67818722123A	Dead	FEMALE		NA	NA	NA	No	WHITE	Primary Tumor
TCGA-BH-A1FH-01	TCGA-BH-A1FH		5th	T2	M1	-17172		0.0222	NA	4670	1123	47		NA			NOT HISPANIC OR LATINO	Core needle biopsy		2011-09-08	C50.9	YES	430	C50.9	8500/3	NO	0	YES		8	No	N1b	Stage IV		TRUE	1783cac1-253a-40af-a9ac-48dfb20e1ab8	f0785dc2-a43e-4b59-a21c-ab55c490d441	DECEASED	36.9	501C3E1B-573B-4A5A-A0ED-3CD15432E6FF	Dead	FEMALE	WITH TUMOR	NA	8	13	No	WHITE	Primary Tumor
TCGA-BH-A1FJ-01	TCGA-BH-A1FJ		5th	T3	M0	-24262		0.1	NA	4574	1927	66		NA			NOT HISPANIC OR LATINO	Core needle biopsy		2011-09-08	C50.9	YES	190	C50.9	8500/3	NO	0	YES		25	No	N1b	Stage IIIA		TRUE	f6581eee-61b9-43d4-ab0d-ce5ce3ba1c74	72367269-4151-4e1f-8636-ff91396ba46c	DECEASED	63.3	8169BE67-03C8-4F4D-9A60-200705B795AE	Dead	FEMALE		NA	6	35	No	WHITE	Primary Tumor
TCGA-BH-A1FL-01	TCGA-BH-A1FL		5th	T2	M0	-25558		0.0908	NA	4572	1673	69		NA			NOT HISPANIC OR LATINO	Fine needle aspiration biopsy		2011-09-08	C50.9	YES	100	C50.9	8522/3	NO	0	YES		25	No	N1b	Stage IIB		TRUE	14d1d84e-99e1-41ad-8892-3b4da3d4f948	6adbf536-e89b-4148-8ed6-9b9117f78c64	DECEASED	55	032B81C5-F936-448E-A352-C186DF160B7C	Dead	FEMALE	WITH TUMOR	NA	4	22	No	WHITE	Primary Tumor
TCGA-BH-A1FM-01	TCGA-BH-A1FM		5th	T2	M0	-16289		0.527	NA	4753	1388	44		NA			NOT HISPANIC OR LATINO	Core needle biopsy		2011-09-08	C50.9	YES	260	C50.9	8500/3	NO	0	YES		40	No	N2	Stage IIIA		TRUE	7eb18190-5a41-4637-9783-f81bbde499e4	cf2b65de-c6a1-4ebc-a62a-c652ce17d2d0	DECEASED	45.6	DA6A0EC9-6E20-4E4A-9B7F-A32EFF7627AD	Dead	FEMALE		NA	8	10	No	WHITE	Primary Tumor
TCGA-BH-A1FN-01	TCGA-BH-A1FN		5th	T2	M0	-12525		0.535	NA	4838	2192	34		NA			NOT HISPANIC OR LATINO	Fine needle aspiration biopsy		2011-09-08	C50.9	YES	80	C50.9	8500/3	NO	0	YES		93	No	N0	Stage IIA		TRUE	6dd0dd7b-62ff-4fd1-a99a-b265f1a91dca	ae08dbd6-548a-469c-ba12-b6a87515bce7	DECEASED	72	26F47A4F-B501-4C33-9D49-2039E98DBF26	Dead	FEMALE	WITH TUMOR	NA	0	29	No	WHITE	Primary Tumor
TCGA-BH-A1FR-01	TCGA-BH-A1FR		5th	T4b	M0	-26684		0.0005493	NA	4876	4398	73		NA			NOT HISPANIC OR LATINO	Core needle biopsy		2011-09-08	C50.9	YES	110	C50.9	8523/3	NO	0	YES		20	No	N1a	Stage IIIB		TRUE	bf3b1481-ae31-4406-b084-b6cc1d7163e3	0fc347ae-7ad9-4987-887a-d37fe871d6c2	DECEASED	144	B6E6765F-14BC-4D3D-9266-EF8065354070	Dead	FEMALE	WITH TUMOR	NA	4	10	No	WHITE	Primary Tumor
TCGA-BH-A1FU-01	TCGA-BH-A1FU		5th	T1c	M0	-16174		0.0641	NA	5041	2192	44		NA			NOT HISPANIC OR LATINO	Fine needle aspiration biopsy		2011-09-08	C50.9	YES	110	C50.9	8500/3	NO	0	YES		40	No	N0	Stage IA		TRUE	c348a9b3-c901-4384-a222-144387bac0c5	438152c8-2d26-4b35-9f68-a4b6c473916e	DECEASED	72	58B02C83-2AF7-4978-A3F7-A8B9E0D914A1	Dead	FEMALE	WITH TUMOR	NA	0	5	No	WHITE	Primary Tumor
TCGA-BH-A201-01	TCGA-BH-A201		7th	T1	M0	-23423		0.127	210	86	NA	64		6.9	DiseaseFree		NOT HISPANIC OR LATINO	Core needle biopsy		2011-09-08	C50.9	YES	120	C50.9	8500/3	NO	0	YES	Post (prior bilateral ovariectomy OR >12 mo since LMP with no prior hysterectomy)	16	No	N0	Stage IA		TRUE	3bf81a9f-abb4-4495-a514-fd3865e13a03	7893162b-3d19-4c54-86ee-aa4884d84e8a	LIVING	6.9	6AE92F6F-E29D-43B6-AF1E-F15720C1AAE8	Alive	FEMALE	TUMOR FREE	NA	0	2	No	WHITE	Primary Tumor
TCGA-BH-A202-01	TCGA-BH-A202		6th	T2	M0	-22052		0.269	22	62	NA	60		0.72	DiseaseFree		NOT HISPANIC OR LATINO	Core needle biopsy		2011-09-08	C50.9	YES	200	C50.9	8500/3	NO	0	YES	Post (prior bilateral ovariectomy OR >12 mo since LMP with no prior hysterectomy)	26	No	N0	Stage II		TRUE	e7a00d67-2c26-4d1f-bd17-35f659e88bc1	8fa798fe-f032-4d77-b362-06261db78e6d	LIVING	0.72	57323AE5-3EFE-4492-8522-D9A6DB3F1BE0	Alive	FEMALE		NA	0	4	No	WHITE	Primary Tumor
TCGA-BH-A203-01	TCGA-BH-A203		5th	T2	M0	-28609		0.362	NA	5418	1174	78		NA			NOT HISPANIC OR LATINO			2011-09-08	C50.9	YES	340	C50.9	8500/3	NO	0	YES	Post (prior bilateral ovariectomy OR >12 mo since LMP with no prior hysterectomy)	54	No	N1b	Stage IIB		TRUE	b3264748-947a-43aa-b227-b294fbcc8447	002997ef-3b93-443a-80a3-bae63e129d99	DECEASED	38.6	3EBBE51B-6D17-4A77-AAE1-E0424CEA56DB	Dead	FEMALE	WITH TUMOR	NA	35	39	No	WHITE	Primary Tumor
TCGA-BH-A204-01	TCGA-BH-A204		5th	T2	M0	-29529		0.235	NA	5538	2534	80		NA			NOT HISPANIC OR LATINO	Fine needle aspiration biopsy		2011-09-08	C50.9	YES	420	C50.9	8500/3	NO	0	YES	Post (prior bilateral ovariectomy OR >12 mo since LMP with no prior hysterectomy)	33	No	N1b	Stage IIB		TRUE	05135396-df5c-49db-b34e-f4add5b65a2b	a28d9c46-4774-4167-8c1e-ee95436c7b2e	DECEASED	83.3	531B1E8E-9936-42E0-B49B-39C61DD4E943	Dead	FEMALE		NA	2	16	No	WHITE	Primary Tumor
TCGA-BH-A208-01	TCGA-BH-A208		5th	T2	M0	-17715		0.164	NA	5893	1759	48		NA			NOT HISPANIC OR LATINO	Core needle biopsy		2011-09-08	C50.9	YES	620	C50.9	8500/3	NO	0	YES		51	No	N1b	Stage IIB		TRUE	ddcbdac6-9e43-4146-a611-d033125eba14	723e0934-327e-46f2-94f0-20a65da1ea0e	DECEASED	57.8	4F943D12-E769-45F3-86BE-75193786DD4E	Dead	FEMALE	TUMOR FREE	NA	3	15	No	WHITE	Primary Tumor
TCGA-BH-A209-01	TCGA-BH-A209		5th	T1c	M0	-28403		0.307	NA	5392	3959	77		NA			NOT HISPANIC OR LATINO	Fine needle aspiration biopsy		2011-09-08	C50.9	YES	390	C50.9	8510/3	NO	0	YES	Post (prior bilateral ovariectomy OR >12 mo since LMP with no prior hysterectomy)	75	No	N0	Stage I		TRUE	5258294f-ef5b-4091-9183-6bcc545d54b2	fbf64fdd-6787-4647-b0cd-860acc8abce6	DECEASED	130	E28150CE-E9B6-4C3F-B867-F9A75E2648DC	Dead	FEMALE	TUMOR FREE	NA	0	12	No	BLACK OR AFRICAN AMERICAN	Primary Tumor
TCGA-BH-A28O-01	TCGA-BH-A28O		7th	T3a	M0	-18501		0.0003286	324	163	NA	50		10.6	DiseaseFree	Negative	NOT HISPANIC OR LATINO	Fine needle aspiration biopsy		2012-07-02	C50.9	YES	80	C50.9	8520/3	NO	0	YES		18	No	N3	Stage IIIC		TRUE	84B7CCF2-8AB3-4B21-96DE-800D231BC072	405B2B8F-7E2E-4D80-89BE-299DA48374EF	LIVING	10.6	12A869FC-7578-4506-BB23-7C25597834EA	Alive	FEMALE	TUMOR FREE	NA	14	14	No	WHITE	Primary Tumor
TCGA-BH-A28Q-01	TCGA-BH-A28Q		7th	T2	M0	-16882		0.161	196	223	NA	46		6.44	DiseaseFree		NOT HISPANIC OR LATINO	Fine needle aspiration biopsy		2011-09-29	C50.9	YES	400	C50.9	8520/3	NO	0	YES	Pre (<6 months since LMP AND no prior bilateral ovariectomy AND not on estrogen replacement)	18	No	N1a	Stage IIB		TRUE	32861b48-83f5-43a3-bb54-45215ad2c5d6	9864f875-05af-4336-b532-a283e4dfeed6	LIVING	6.44	9D040C65-C225-4D41-BA4C-6BB21EC1CD32	Alive	FEMALE	TUMOR FREE	NA	2	18	No	WHITE	Primary Tumor
TCGA-C8-A12K-01	TCGA-C8-A12K		6th	T2	M0	-29463		0.486	0	57	NA	80		0	DiseaseFree	Negative	NOT HISPANIC OR LATINO	Tumor resection		2011-04-12	C50.9	YES	970	C50.9	8500/3	NO	0		Post (prior bilateral ovariectomy OR >12 mo since LMP with no prior hysterectomy)	88	No	N1	Stage IIB		TRUE	6b923e30-2ddc-407f-91b1-c202f1373fbb	aa21df77-6622-405a-821a-1122f9c93159	LIVING	0	149E102C-FE01-4FC0-8410-CD9743CAFA15	Alive	FEMALE	TUMOR FREE	NA	1	7	No	ASIAN	Primary Tumor
TCGA-C8-A12L-01	TCGA-C8-A12L		6th	T2	M0	-24710		0.61	0	62	NA	67		11.9	DiseaseFree	Negative	NOT HISPANIC OR LATINO	Other method, specify:	Patey's Suregery	2011-04-12	C50.9	YES	460	C50.9	8500/3	NO	0		Post (prior bilateral ovariectomy OR >12 mo since LMP with no prior hysterectomy)	67	No	N0 (i-)	Stage IIA		TRUE	441919eb-8c9f-478c-bda3-8de4f8295e8a	e3cf8f8c-8fe6-45e2-b786-7db5590c08cb	LIVING	11.9	150DD5CB-1CA0-4110-95A7-6476B5B6FC24	Alive	FEMALE	TUMOR FREE	NA	NA	3	No	ASIAN	Primary Tumor
TCGA-C8-A12M-01	TCGA-C8-A12M		6th	T2	M0	-25811		0.449	0	57	NA	70		11.8	DiseaseFree	Negative	NOT HISPANIC OR LATINO	Other method, specify:	Patey's Surgery	2011-04-12	C50.9	YES	510	C50.9	8500/3	NO	0		Post (prior bilateral ovariectomy OR >12 mo since LMP with no prior hysterectomy)	52	No	N0 (i-)	Stage IIA		TRUE	dd0f8e5a-383d-4f03-bb71-0e115d4e442c	4874e4e2-c067-490d-9d99-8d3ca194b0a4	LIVING	11.8	76F67AA2-4E17-48F5-810B-E4F4338902DC	Alive	FEMALE	TUMOR FREE	NA	NA	10	No	ASIAN	Primary Tumor
TCGA-C8-A12N-01	TCGA-C8-A12N		6th	T2	M0	-21428		0.0757	0	57	NA	58		11.8	DiseaseFree	Negative	NOT HISPANIC OR LATINO	Other method, specify:	Patey's Surgery	2011-04-12	C50.9	YES	290	C50.9	8500/3	NO	0		Post (prior bilateral ovariectomy OR >12 mo since LMP with no prior hysterectomy)	18	No	N0 (i-)	Stage IIA		TRUE	b8a615f9-d19b-4b09-8ec8-0674e5c648cd	3f2c52a6-d79d-407d-9c71-11a58ab4e129	LIVING	11.8	A845013D-BF15-42FB-8BFE-FCE206E943FE	Alive	FEMALE	TUMOR FREE	NA	NA	10	No	ASIAN	Primary Tumor
TCGA-C8-A12O-01	TCGA-C8-A12O		6th	T2	M0	-18506		0.334	0	57	NA	50		12.7	DiseaseFree	Negative	NOT HISPANIC OR LATINO	Other method, specify:	Patey's Surgery	2011-04-13	C50.9	YES	650	C50.9	8500/3	NO	0		Pre (<6 months since LMP AND no prior bilateral ovariectomy AND not on estrogen replacement)	32	No	N0 (i-)	Stage IIA		TRUE	83f26720-007c-42c9-a7de-7484bf8afa89	2c66d45a-c014-4fbe-9ff2-4ca17ec59ba9	LIVING	12.7	273152AA-7B4C-4AE5-9231-1A3160058C74	Alive	FEMALE	TUMOR FREE	NA	NA	10	No	ASIAN	Primary Tumor
TCGA-C8-A12P-01	TCGA-C8-A12P		6th	T2	M0	-20332		0.339	0	57	NA	55		11.8	DiseaseFree	Negative	NOT HISPANIC OR LATINO	Other method, specify:	Patey's Surgery	2011-04-13	C50.9	YES	380	C50.9	8500/3	NO	0		Post (prior bilateral ovariectomy OR >12 mo since LMP with no prior hysterectomy)	122	No	N1	Stage IIB		TRUE	abdc76db-f85e-4337-a57e-6d098789da03	0d5aa7a3-3488-4339-b8f1-e4971912e2bc	LIVING	11.8	F04324BB-F0B1-4948-9189-7833646029F1	Alive	FEMALE	TUMOR FREE	NA	NA	8	No	ASIAN	Primary Tumor
TCGA-C8-A12Q-01	TCGA-C8-A12Q			T1	M0	-28733		0.409	2	57	NA	78		NA		Negative	NOT HISPANIC OR LATINO	Other method, specify:	Patey's Surgery	2011-04-13	C50.9	YES	810	C50.9	8500/3	NO	0		Post (prior bilateral ovariectomy OR >12 mo since LMP with no prior hysterectomy)	82	No	N2	Stage IIIA		TRUE	a824b3bd-34d5-4cc1-a92f-f9d6ac0f1814	8867f07e-0993-4c9a-96df-18e24801ba80	DECEASED	12.7	90AF32F0-5684-4D5B-B619-2B12DA3823C6	Dead	FEMALE	TUMOR FREE	NA	NA	7	No	ASIAN	Primary Tumor
TCGA-C8-A12T-01	TCGA-C8-A12T		6th	T2	M0	NA		0.231	0	51	NA	43		0	DiseaseFree	Negative	NOT HISPANIC OR LATINO	Tumor resection		2011-04-11	C50.9	YES	540	C50.9	8500/3	NO	0	YES	Pre (<6 months since LMP AND no prior bilateral ovariectomy AND not on estrogen replacement)	129	No	N0	Stage IIA		TRUE	71229981-97c2-4ae1-a130-fe5de336b37d	ea0b870f-324e-4d12-be78-1737ef7f80b5	LIVING	0	4D751232-CD64-468E-AEBF-46F94FB6281F	Alive	FEMALE	TUMOR FREE	NA	0	5	No	ASIAN	Primary Tumor
TCGA-C8-A12U-01	TCGA-C8-A12U		6th	T2	M0	-17045		0.534	0	57	NA	46		12.7	DiseaseFree	Negative	NOT HISPANIC OR LATINO	Other method, specify:	Patey's Surgery	2011-04-13	C50.9	YES	580	C50.9	8500/3	NO	0	YES	Pre (<6 months since LMP AND no prior bilateral ovariectomy AND not on estrogen replacement)	37	No	N1	Stage IIB		TRUE	97b5f490-1cd9-4833-b903-5f4c6e45670d	c514a893-e085-4a67-b386-b61c3b63a22c	LIVING	12.7	B6428344-2D68-404B-AD9F-CA6E0B0552B2	Alive	FEMALE	TUMOR FREE	NA	NA	7	No	ASIAN	Primary Tumor
TCGA-C8-A12V-01	TCGA-C8-A12V		6th	T2	M0	-20346		0.00271	0	57	NA	55		12.7	DiseaseFree		NOT HISPANIC OR LATINO	Tumor resection		2011-03-22	C50.9	YES	540	C50.9	8500/3	NO	0	YES	Post (prior bilateral ovariectomy OR >12 mo since LMP with no prior hysterectomy)	22	No	N0	Stage IIA		TRUE	7e1673f8-5758-4963-8804-d5e39f06205b	905de5ec-787c-471d-964b-9db587003602	LIVING	12.7	8ED8A37B-C885-4333-AC5D-EA73A5A81173	Alive	FEMALE	TUMOR FREE	NA	0	5	No	ASIAN	Primary Tumor
TCGA-C8-A12W-01	TCGA-C8-A12W		6th	T4	M0	-18140		0.35	7	57	NA	49		12.7	DiseaseFree	Negative	NOT HISPANIC OR LATINO	Other method, specify:	Patey's Surgery	2011-04-13	C50.9	YES	890	C50.9	8500/3	NO	0	YES	Pre (<6 months since LMP AND no prior bilateral ovariectomy AND not on estrogen replacement)	37	No	N1	Stage IIIB		TRUE	6adca853-1b09-47ff-814c-47b732a76d96	ded3862e-9e2f-468a-8a40-d90363a2742e	LIVING	12.7	8A64D890-ABEF-4AF2-8915-D17DA89B8FC5	Alive	FEMALE	TUMOR FREE	NA	NA	7	No	ASIAN	Primary Tumor
TCGA-C8-A12X-01	TCGA-C8-A12X		6th	T2	M0	-22889		0.297	0	57	NA	62		12.7	DiseaseFree	Negative	NOT HISPANIC OR LATINO	Other method, specify:	Patey's Surgery	2011-04-13	C50.9	YES	410	C50.9	8480/3	NO	0	YES	Post (prior bilateral ovariectomy OR >12 mo since LMP with no prior hysterectomy)	46	No	N1	Stage IIB		TRUE	65cde5d5-1efc-4e30-b1bd-a93598794f2c	4ab470ca-b87c-448e-b4c6-48db22e39a39	LIVING	12.7	B3FCE052-931C-4798-A188-F04A2178A5F6	Alive	FEMALE	TUMOR FREE	NA	NA	6	No	ASIAN	Primary Tumor
TCGA-C8-A12Y-01	TCGA-C8-A12Y		6th	T2	M0	NA		0.233	0	57	NA	44		0	DiseaseFree	Negative	NOT HISPANIC OR LATINO	Other method, specify:	Patey's Surgery	2011-04-13	C50.9	YES	380	C50.9	8500/3	NO	0	YES	Pre (<6 months since LMP AND no prior bilateral ovariectomy AND not on estrogen replacement)	22	No	N1	Stage IIB		TRUE	298a1710-deb4-4064-a0f2-da32d43aa217	d9de9f71-2b39-4d21-9c93-8e199080c011	LIVING	0	28E368DA-56B9-4BB1-99C3-7FF2CEC964CF	Alive	FEMALE	TUMOR FREE	NA	NA	9	No	ASIAN	Primary Tumor
TCGA-C8-A12Z-01	TCGA-C8-A12Z		6th	T2	M0	-16520		0.27	0	57	NA	45		0	DiseaseFree	Negative	NOT HISPANIC OR LATINO	Other method, specify:	Patey's Surgery	2011-04-13	C50.9	YES	490	C50.9	8500/3	NO	0	YES	Peri (6-12 months since last menstrual period)	42	No	N1	Stage IIB		TRUE	42621dfa-abfd-4c7d-8bc5-a02a09d1c2b4	238ffa7f-eecf-4f46-8831-efa0d23fa66c	LIVING	0	89B312D1-9FDD-4756-9C15-5442B428F75A	Alive	FEMALE	TUMOR FREE	NA	2	2	No	ASIAN	Primary Tumor
TCGA-C8-A130-01	TCGA-C8-A130		6th	T3	M0	-19118		0.508	3	88	NA	52		3.12	DiseaseFree	Negative	NOT HISPANIC OR LATINO	Other method, specify:	Patey's Surgery	2011-04-13	C50.9	YES	550	C50.9	8500/3	NO	0	YES	Peri (6-12 months since last menstrual period)	29	No	N2	Stage IIIA		TRUE	8cf54607-01ce-42b0-9bd9-8627edd9f3b7	3bea8456-da16-4691-a260-5c94a83e2860	LIVING	3.12	3E24D3A0-9741-4635-89DB-EED4BA3F6AAA	Alive	FEMALE	TUMOR FREE	NA	NA	8	No	ASIAN	Primary Tumor
TCGA-C8-A131-01	TCGA-C8-A131		6th	T2	M0	-29980		0.23	0	149	NA	82		1.77	DiseaseFree	Negative	NOT HISPANIC OR LATINO	Other method, specify:	Patey's Surgery	2011-04-15	C50.9	YES	460	C50.9	8500/3	NO	0	YES	Post (prior bilateral ovariectomy OR >12 mo since LMP with no prior hysterectomy)	50	No	N2	Stage IIIA		TRUE	c49e3b18-fd88-48f4-8b01-300692ceb367	8ba927e8-83e7-43d8-ba16-00d45a0f0484	LIVING	1.77	65C73797-1A8F-474D-94F6-45A2878B2C45	Alive	FEMALE	TUMOR FREE	NA	4	8	No	ASIAN	Primary Tumor
TCGA-C8-A132-01	TCGA-C8-A132		6th	T2	M0	-20484		0.148	0	149	NA	56		1.45	DiseaseFree	Negative	NOT HISPANIC OR LATINO	Tumor resection		2011-04-15	C50.9	YES	420	C50.9	8500/3	NO	0	YES	Post (prior bilateral ovariectomy OR >12 mo since LMP with no prior hysterectomy)	46	No	N1	Stage IIB		TRUE	89e867de-d30e-4bfc-a453-0a76309dabd5	5de50617-0a03-45b7-8ffd-bcf3a0680d6b	LIVING	1.45	175224E6-3A06-4799-B695-704C254A847C	Alive	FEMALE	TUMOR FREE	NA	1	4	No	ASIAN	Primary Tumor
TCGA-C8-A133-01	TCGA-C8-A133		6th	T3	M0	-23922		0.005322	0	119	NA	65		0	DiseaseFree	Negative	NOT HISPANIC OR LATINO	Other method, specify:	Modified Radical Masectomy	2011-04-15	C50.9	YES	480	C50.9	8523/3	NO	0	YES	Post (prior bilateral ovariectomy OR >12 mo since LMP with no prior hysterectomy)	19	No	N1	Stage IIIA		TRUE	b8b6cebc-26dc-43ae-a94a-20da6018f7ae	bc05cd4d-188f-4634-b6e4-c72a3683afed	LIVING	0	C47488B4-0E7E-46FB-91C6-0BEA58695974	Alive	FEMALE	TUMOR FREE	NA	NA	26	No	WHITE	Primary Tumor
TCGA-C8-A134-01	TCGA-C8-A134		6th	T2	M0	-19023		0.443	1	149	NA	52		0.69	DiseaseFree	Negative	NOT HISPANIC OR LATINO	Tumor resection		2011-04-15	C50.9	YES	530	C50.9	8500/3	NO	0		Peri (6-12 months since last menstrual period)	77	No	N0	Stage IIA		TRUE	f1692f4b-ce1b-4fc5-ac55-1022ecae0d1e	e20c3a54-2fe7-4e5e-a41c-ad4efeb97f76	LIVING	0.69	CA8DFAB4-FC1F-45F9-B98A-9AF06A01DB28	Alive	FEMALE	TUMOR FREE	NA	NA	7	No	ASIAN	Primary Tumor
TCGA-C8-A135-01	TCGA-C8-A135		6th	T2	M0	-23680		0.298	0	149	NA	64		0.62	DiseaseFree	Negative	NOT HISPANIC OR LATINO	Tumor resection		2011-04-15	C50.9	YES	760	C50.9	8500/3	NO	0	YES	Post (prior bilateral ovariectomy OR >12 mo since LMP with no prior hysterectomy)	43	No	N1	Stage IIB		TRUE	33cea538-4c3f-470a-972d-257c43241ab4	ddfbecf6-37e3-4015-bb24-125ccdd60d25	LIVING	0.62	7045ECC9-72B3-4AD3-A6C6-4F8C6914EAA1	Alive	FEMALE	TUMOR FREE	NA	1	3	No	ASIAN	Primary Tumor
TCGA-C8-A137-01	TCGA-C8-A137		6th	T2	M0	-12737		0.223	26	94	NA	34		3.84	DiseaseFree	Negative	NOT HISPANIC OR LATINO	Tumor resection		2011-04-15	C50.9	YES	610	C50.9	8500/3	NO	0	YES	Pre (<6 months since LMP AND no prior bilateral ovariectomy AND not on estrogen replacement)	39	No	N1	Stage IIB		TRUE	03ab1e9f-4918-404d-b178-3a4fd929c5e8	69f11430-f6f2-46bd-ba02-f09cec02e168	LIVING	3.84	140F8918-739F-498A-9A17-B307E40E6060	Alive	FEMALE	TUMOR FREE	NA	NA	2	No	ASIAN	Primary Tumor
TCGA-C8-A138-01	TCGA-C8-A138		6th	T2	M0	-20063		0.356	-3	83	NA	54		3.75	DiseaseFree	Negative	NOT HISPANIC OR LATINO	Tumor resection		2011-04-15	C50.9	YES	230	C50.9	8500/3	NO	0	YES	Post (prior bilateral ovariectomy OR >12 mo since LMP with no prior hysterectomy)	39	No	N2	Stage IIIA		TRUE	b6c286c6-2755-419b-87d3-59c7feda9653	f386bdc5-6530-400d-9f82-db2c96449a70	LIVING	3.75	3584F6CE-F9ED-441C-8714-BDF67C141CD6	Alive	FEMALE	TUMOR FREE	NA	NA	2	No	ASIAN	Primary Tumor
TCGA-C8-A1HE-01	TCGA-C8-A1HE		6th	T2	M0	NA		0.118	0	109	NA	59		12.3	DiseaseFree	Negative	NOT HISPANIC OR LATINO	Tumor resection		2011-05-24	C50.9	YES	280	C50.8	8500/3	NO	0	YES	Post (prior bilateral ovariectomy OR >12 mo since LMP with no prior hysterectomy)	44	No	N0	Stage IIA		TRUE	b26d41cd-393b-4cd4-8925-a9488f7de576	f2eac3ac-cb30-4d6d-a85a-4ea1ad3e7301	LIVING	12.3	DDB31719-1D2F-4502-B80E-544B684DC16F	Alive	FEMALE	TUMOR FREE	NA	NA	5	No	ASIAN	Primary Tumor
TCGA-C8-A1HF-01	TCGA-C8-A1HF		6th	T2	M0	NA		0.248	0	109	NA	48		10.9	DiseaseFree	Negative	NOT HISPANIC OR LATINO	Tumor resection		2011-05-24	C50.9	YES	460	C50.8	8500/3	NO	0	YES	Pre (<6 months since LMP AND no prior bilateral ovariectomy AND not on estrogen replacement)	22	No	N0	Stage IIA		TRUE	a2453bcb-90f2-4505-949d-a89cf4bfc9b8	f2a49aa7-b756-4eaa-a6fd-00f56c7e7851	LIVING	10.9	40B07BB9-2CDB-463A-8773-771017E73DBC	Alive	FEMALE	TUMOR FREE	NA	NA	12	No	ASIAN	Primary Tumor
TCGA-C8-A1HG-01	TCGA-C8-A1HG		6th	T2	M0	NA		0.359	0	122	NA	50		11.3	DiseaseFree	Negative	NOT HISPANIC OR LATINO	Tumor resection		2011-05-24	C50.9	YES	300	C50.8	8500/3	NO	0	NO	Pre (<6 months since LMP AND no prior bilateral ovariectomy AND not on estrogen replacement)	34	No	N0	Stage IIA		TRUE	0c23c380-363c-474d-b64c-b47f612a8225	bed56886-f4fe-4917-b32a-18b3d3f47c24	LIVING	11.3	0813A175-83ED-4F6E-AD7D-FB4135CFF34C	Alive	FEMALE	TUMOR FREE	NA	NA	NA	No	ASIAN	Primary Tumor
TCGA-C8-A1HI-01	TCGA-C8-A1HI		6th	T2	M0	NA		0.258	2	122	NA	40		11.3	DiseaseFree	Negative	NOT HISPANIC OR LATINO	Tumor resection		2011-06-01	C50.9	YES	490	C50.1	8500/3	NO	0	YES	Pre (<6 months since LMP AND no prior bilateral ovariectomy AND not on estrogen replacement)	28	No	N2	Stage IIIA		TRUE	444374f8-9282-439c-af00-0f828edcbff3	f0471d79-d107-4809-976e-fe5b231f0e9d	LIVING	11.3	04EF4A48-80E1-4567-BB61-2B542F715266	Alive	FEMALE	TUMOR FREE	NA	NA	6	No	ASIAN	Primary Tumor
TCGA-C8-A1HJ-01	TCGA-C8-A1HJ		6th	T2	M0	-19629		0.513	5	121	NA	53		0.16	DiseaseFree	Negative	NOT HISPANIC OR LATINO	Tumor resection		2011-06-01	C50.9	YES	1070	C50.4	8500/3	NO	0	YES	Peri (6-12 months since last menstrual period)	99	No	N0	Stage IIA		TRUE	a855c228-a263-44df-87a0-cbc32187e3f5	e11024c2-709d-4e47-a9f3-45894a27f2bb	LIVING	0.16	11F98715-1482-4D7D-9102-E362634806A7	Alive	FEMALE	TUMOR FREE	NA	NA	10	No	ASIAN	Primary Tumor
TCGA-C8-A1HK-01	TCGA-C8-A1HK		6th	T2	M0	NA		0.518	7	116	NA	53		12	DiseaseFree	Negative	NOT HISPANIC OR LATINO	Tumor resection		2011-06-01	C50.9	YES	460	C50.2	8500/3	NO	0	YES	Peri (6-12 months since last menstrual period)	49	No	N1	Stage IIB		TRUE	52c35691-efca-42f5-a03e-02c9f872275c	ca263104-9c70-4b9f-95d1-7a886587eebd	LIVING	12	4D1B4A09-FB4E-45EC-895B-2941D18AED18	Alive	FEMALE	TUMOR FREE	NA	NA	8	No	ASIAN	Primary Tumor
TCGA-C8-A1HL-01	TCGA-C8-A1HL		6th	T3	M0	NA		0.238	2	94	NA	38		10.4	DiseaseFree	Negative	NOT HISPANIC OR LATINO	Tumor resection		2011-06-02	C50.9	YES	980	C50.4	8480/3	NO	0	YES	Pre (<6 months since LMP AND no prior bilateral ovariectomy AND not on estrogen replacement)	24	No	N1	Stage IIIA		TRUE	a8a199c9-d781-4e6c-af8c-c85d60c7cd40	fa3f34b7-5f69-41f8-9384-42af0260d7ec	LIVING	10.4	ACA6B606-681C-427F-8923-77BAA7390795	Alive	FEMALE	TUMOR FREE	NA	NA	9	Yes	ASIAN	Primary Tumor
TCGA-C8-A1HM-01	TCGA-C8-A1HM		6th	T2	M0	-27063		0.512	6	100	NA	74		2.3	DiseaseFree	Negative	NOT HISPANIC OR LATINO	Tumor resection		2011-06-02	C50.9	YES	680	C50.9	8500/3	NO	0	NO	Post (prior bilateral ovariectomy OR >12 mo since LMP with no prior hysterectomy)	251	No	N0	Stage IIA		TRUE	8b525ec6-d24b-49d4-bfcb-b354de4dae7c	e3118dbe-9f93-45b0-81d3-2e64f06b7c74	LIVING	2.3	4DAF6DB8-5429-4B39-B103-D4317166D05B	Alive	FEMALE	TUMOR FREE	NA	NA	NA	No	ASIAN	Primary Tumor
TCGA-C8-A1HN-01	TCGA-C8-A1HN		6th	T2	M0	-20712		0.436	2	88	NA	56		3.25	DiseaseFree	Negative	NOT HISPANIC OR LATINO	Tumor resection		2011-06-02	C50.9	YES	280	C50.9	8500/3	NO	0	NO	Post (prior bilateral ovariectomy OR >12 mo since LMP with no prior hysterectomy)	37	No	N0	Stage IIA		TRUE	86a18ae0-dfb1-49c3-b5c4-67ec331d6e40	fc3fe505-f138-426f-87d3-c7ae138be02d	LIVING	3.25	4C7445ED-B346-4DD7-8AFA-2E95E65364BF	Alive	FEMALE	TUMOR FREE	NA	NA	NA	No	ASIAN	Primary Tumor
TCGA-C8-A1HO-01	TCGA-C8-A1HO		6th	T3	M0	-12715		0.32	0	52	NA	34		0	DiseaseFree	Negative	NOT HISPANIC OR LATINO	Tumor resection		2011-07-12	C50.9	YES	380	C50.2	8500/3	NO	0	NO	Pre (<6 months since LMP AND no prior bilateral ovariectomy AND not on estrogen replacement)	23	No	N3	Stage IIIC		TRUE	b3354b72-2637-4edc-9a95-e55801d3ac13	6e7092aa-e92c-4d9b-8ed1-f8c32f39fe80	LIVING	0	24B1FA5C-7D84-4CE5-B094-2358ECE73C10	Alive	FEMALE	TUMOR FREE	NA	NA	NA	No	ASIAN	Primary Tumor
TCGA-C8-A26V-01	TCGA-C8-A26V		6th	T3	M0	-17468		0.184	9	143	NA	47		0.3	DiseaseFree	Negative	NOT HISPANIC OR LATINO	Other method, specify:	Modified Radical Masectomy	2011-07-21	C50.9	YES	310	C50.9	8500/3	NO	0	NO	Peri (6-12 months since last menstrual period)	61	No	N2	Stage IIIA		TRUE	89414e79-7f89-42d9-8228-101b5bf2f31f	4a299407-b9dc-4500-b6b1-27a474ab4c4a	LIVING	0.3	929AB6C9-58B0-4E37-A2B4-9FC1F9099437	Alive	FEMALE	TUMOR FREE	NA	NA	NA	No	ASIAN	Primary Tumor
TCGA-C8-A26W-01	TCGA-C8-A26W		6th	T2	M0	-21391		0.324	7	142	NA	58		0.23	DiseaseFree	Negative	NOT HISPANIC OR LATINO	Tumor resection		2011-07-21	C50.9	YES	300	C50.9	8500/3	NO	0	NO	Post (prior bilateral ovariectomy OR >12 mo since LMP with no prior hysterectomy)	42	No	N1	Stage IIB		TRUE	ff0f875f-113a-4c0f-8c0a-4259cd496e6d	317b72a8-0332-4db8-b9d1-9a26d9907a24	LIVING	0.23	0F1DC8BC-5987-4C50-9A34-79FFC1D2BA30	Alive	FEMALE	TUMOR FREE	NA	NA	NA	No	ASIAN	Primary Tumor
TCGA-C8-A26X-01	TCGA-C8-A26X		6th	T1	M0	-21463		0.356	11	136	NA	58		0.36	DiseaseFree	Negative	NOT HISPANIC OR LATINO	Tumor resection		2011-07-21	C50.9	YES	190	C50.9	8500/3	NO	0	NO	Post (prior bilateral ovariectomy OR >12 mo since LMP with no prior hysterectomy)	51	No	N1	Stage IIA		TRUE	70ab4f23-23c4-409f-a5cc-18a010c3a24e	01aeb34a-75e4-446d-97ae-6e32c47158ad	LIVING	0.36	8C845114-BBC6-45F2-9135-7E8298E24422	Alive	FEMALE	TUMOR FREE	NA	NA	NA	No	ASIAN	Primary Tumor
TCGA-C8-A26Y-01	TCGA-C8-A26Y		6th	T2	M0	-32872		0.588	13	134	NA	90		0.43	DiseaseFree	Negative	NOT HISPANIC OR LATINO	Tumor resection		2011-07-21	C50.9	YES	140	C50.9	8500/3	NO	0	NO	Post (prior bilateral ovariectomy OR >12 mo since LMP with no prior hysterectomy)	593	No	N0	Stage IIA		TRUE	4d51159f-ab2f-40e3-a363-847c3654431e	de71b625-2b73-43a7-9bc0-89d6a13d0d52	LIVING	0.43	B660432A-A67B-40CC-89F8-80648DB8AE98	Alive	FEMALE	TUMOR FREE	NA	NA	NA	No	ASIAN	Primary Tumor
TCGA-C8-A26Z-01	TCGA-C8-A26Z		6th	T2	M0	NA		0.53	4	125	NA	59		8.28	DiseaseFree	Negative	NOT HISPANIC OR LATINO	Tumor resection		2011-07-21	C50.9	YES	470	C50.9	8500/3	NO	0	NO	Post (prior bilateral ovariectomy OR >12 mo since LMP with no prior hysterectomy)	42	No	N0	Stage IIA		TRUE	dc11b1c7-1f00-4813-b4b5-ecf776b2eb37	5da663cd-e223-41ec-8b2f-796c141ec677	LIVING	8.28	5E21E07E-BD5F-4AC7-985A-178416D756E2	Alive	FEMALE	TUMOR FREE	NA	NA	NA	No	ASIAN	Primary Tumor
TCGA-C8-A273-01	TCGA-C8-A273		6th	T2	M0	NA		0.225	6	168	NA	29		9.66	DiseaseFree	Negative	NOT HISPANIC OR LATINO	Tumor resection		2011-07-21	C50.9	YES	590	C50.9	8500/3	NO	0	YES	Pre (<6 months since LMP AND no prior bilateral ovariectomy AND not on estrogen replacement)	21	No	N1	Stage IIB		TRUE	5a5f0f48-2b13-4e78-b130-901b85d9a7f3	4bdb6c69-67b3-406b-9ac6-9cca2c15f52f	LIVING	9.66	EAB9E75C-2795-4D83-9806-5019DC14256E	Alive	FEMALE	TUMOR FREE	NA	2	7	No	ASIAN	Primary Tumor
TCGA-C8-A274-01	TCGA-C8-A274		6th	T2	M0	-23337		0.419	1	163	NA	63		0.03	DiseaseFree	Negative	NOT HISPANIC OR LATINO	Tumor resection		2011-07-21	C50.9	YES	470	C50.9	8500/3	NO	0	NO	Post (prior bilateral ovariectomy OR >12 mo since LMP with no prior hysterectomy)	149	No	N0	Stage IIA		TRUE	dbcad60f-86c7-41e3-b0ae-baa39c9f83dd	7a3cd962-7512-4797-864a-cf374b5cb385	LIVING	0.03	A7FAA4F2-1846-48CF-9FB5-15E98430F6CE	Alive	FEMALE	TUMOR FREE	NA	NA	NA	No	ASIAN	Primary Tumor
TCGA-C8-A275-01	TCGA-C8-A275		6th	T1	M0	-20774		0.202	1	169	NA	56		0.03	DiseaseFree	Negative	NOT HISPANIC OR LATINO	Tumor resection		2011-07-21	C50.9	YES	300	C50.9	8500/3	NO	0	NO	Post (prior bilateral ovariectomy OR >12 mo since LMP with no prior hysterectomy)	96	No	N1	Stage IIA		TRUE	ce887e90-0660-4f44-a3a4-b3b894cb7eda	17f2ecdd-59bb-4251-a1b3-2e0a461ea070	LIVING	0.03	BDE9E2A9-09E9-49BC-AFBE-BD32916972DC	Alive	FEMALE	TUMOR FREE	NA	NA	NA	No	ASIAN	Primary Tumor
TCGA-C8-A278-01	TCGA-C8-A278		6th	T2	M0	-22606		0.166	1	163	NA	61		0.03	DiseaseFree	Negative	NOT HISPANIC OR LATINO	Tumor resection		2011-07-21	C50.9	YES	630	C50.9	8500/3	NO	0	NO	Post (prior bilateral ovariectomy OR >12 mo since LMP with no prior hysterectomy)	24	No	N2	Stage IIIA		TRUE	65077db7-dd59-4362-9d28-d5a9154e9be0	112649f5-133d-4c45-a66f-4fe9a70bd5b7	LIVING	0.03	4F3E197A-9731-427C-A2AB-2D506A1C717B	Alive	FEMALE	TUMOR FREE	NA	NA	NA	No	ASIAN	Primary Tumor
TCGA-C8-A27A-01	TCGA-C8-A27A		6th	T2	M0	-17779		0.301	371	435	NA	48		12.2	DiseaseFree	Negative	NOT HISPANIC OR LATINO	Tumor resection		2011-07-21	C50.9	YES	230	C50.9	8500/3	NO	0	NO	Peri (6-12 months since last menstrual period)	19	No	N1	Stage IIB		TRUE	3b1f7e48-216d-47de-ba79-db350f52bff0	b692cb10-ff2f-456b-a2c0-706b608d4e7e	LIVING	12.2	4CC1413A-5D03-4BE4-91E5-80B578CE7DFA	Alive	FEMALE	TUMOR FREE	NA	NA	NA	No	ASIAN	Primary Tumor
TCGA-C8-A27B-01	TCGA-C8-A27B		6th	T3	M0	-17763		0.739	30	93	NA	48		0.99	DiseaseFree	Negative	NOT HISPANIC OR LATINO	Tumor resection		2011-07-21	C50.9	YES	240	C50.9	8500/3	NO	0	NO	Peri (6-12 months since last menstrual period)	123	No	N0	Stage IIB		TRUE	f0d8a1fe-e313-44f1-99cc-b965cbeeff0e	67d804d7-b6a5-4a70-92cd-f93195d928a4	LIVING	0.99	CD43BA31-A5C6-4C0C-AA07-3171332776CC	Alive	FEMALE	TUMOR FREE	NA	NA	NA	No	ASIAN	Primary Tumor
TCGA-C8-A3M7-01	TCGA-C8-A3M7		7th	T4b	M0	-22096		0.178	1	401	NA	60		0.03	DiseaseFree	Negative	NOT HISPANIC OR LATINO	Tumor resection		2012-03-06	C50.9	YES	970	C50.9	8520/3	NO	0	YES	Post (prior bilateral ovariectomy OR >12 mo since LMP with no prior hysterectomy)	118	No	N0	Stage IIIB		TRUE	959FF069-8A49-4C9B-85C2-5291CAC0ACFF	668220CE-7E03-4CCF-99F9-99127DDF9806	LIVING	0.03	953ADB1E-77C9-4721-B624-F9CCF040575F	Alive	FEMALE	TUMOR FREE	NA	0	6	No	ASIAN	Primary Tumor
TCGA-C8-A3M8-01	TCGA-C8-A3M8		7th	T1c	M0	-24877		0.252	7	264	NA	68		0.23	DiseaseFree	Negative	NOT HISPANIC OR LATINO	Tumor resection		2012-03-06	C50.9	YES	280	C50.9	8520/3	NO	0	YES	Post (prior bilateral ovariectomy OR >12 mo since LMP with no prior hysterectomy)	45	No	N0	Stage IA		TRUE	C1E704D6-A33B-4891-90BD-992B0040C075	122305ED-CA1E-431F-A332-0AC3409CDED2	LIVING	0.23	25CD89AC-052F-4B9F-AE1C-B0824A7A5145	Alive	FEMALE	TUMOR FREE	NA	NA	NA	No	ASIAN	Primary Tumor
TCGA-D8-A13Y-01	TCGA-D8-A13Y			T1c	M0	-19028	manual counting	0.947	264	184	NA	52		11.9	DiseaseFree	Negative	NOT HISPANIC OR LATINO	Core needle biopsy		2011-02-23	C50.9	YES	430	C50.9	8500/3	NO	0		Post (prior bilateral ovariectomy OR >12 mo since LMP with no prior hysterectomy)	58	No	N0	Stage IA		FALSE	17f275c1-a0d4-487d-8f02-ea279584b4cd	0dcfd67b-64b2-4333-af18-a2638dd82952	LIVING	11.9	0CF5DE3C-272C-4127-8047-4359D1278181	Alive	FEMALE	TUMOR FREE	NA	0	6	No	WHITE	Primary Tumor
TCGA-D8-A13Z-01	TCGA-D8-A13Z		7th	T2	M0	-18942		0.499	210	214	NA	51		20.9	DiseaseFree	Negative	NOT HISPANIC OR LATINO	Fine needle aspiration biopsy		2011-02-27	C50.9	YES	470	C50.9	8500/3	NO	0	YES	Post (prior bilateral ovariectomy OR >12 mo since LMP with no prior hysterectomy)	71	No	N2a	Stage X		FALSE	5a17dcd9-5ced-4a69-8069-23c7fd0649d1	8caec376-1f90-4802-947f-b893c370f219	LIVING	20.9	8EFA6C19-2FA1-4F23-AF7B-15681E8E930A	Alive	FEMALE		NA	9	11	No	WHITE	Primary Tumor
TCGA-D8-A140-01	TCGA-D8-A140		7th	T2	M0	-22900	manual counting	0.232	27	204	NA	62		13.2	DiseaseFree	Negative	NOT HISPANIC OR LATINO	Core needle biopsy		2011-02-26	C50.9	YES	400	C50.9	8500/3	NO	0	YES	Post (prior bilateral ovariectomy OR >12 mo since LMP with no prior hysterectomy)	75	No	N1a	Stage IIB		FALSE	2585edbd-3488-4100-a4ab-a161252a31ee	660954c6-51ed-4b74-8eb0-65c282da3971	LIVING	13.2	D78476E6-799F-4DED-A219-CBFE2DE3C77B	Alive	FEMALE		NA	1	15	No	WHITE	Primary Tumor
TCGA-D8-A141-01	TCGA-D8-A141		7th	T1c	M0	-14626	manual counting	0.049	113	205	NA	40		20.6	DiseaseFree	Negative	NOT HISPANIC OR LATINO	Fine needle aspiration biopsy		2011-02-27	C50.9	YES	120	C50.9	8500/3	NO	0	YES	Indeterminate (neither Pre or Postmenopausal)	16	No	N1	Stage X		FALSE	42f6f503-4cf6-4a8e-b5fe-b44bccf6b38b	be0c070b-a114-4bae-9409-33f216bbfd4f	LIVING	20.6	AA6F84C8-D0B4-446F-A8A7-8CE7F9D07ECF	Alive	FEMALE		NA	1	15	No	WHITE	Primary Tumor
TCGA-D8-A142-01	TCGA-D8-A142		7th	T3	M0	-27313		0.522	61	212	NA	74		14	DiseaseFree	Negative	NOT HISPANIC OR LATINO	Core needle biopsy		2011-02-25	C50.9	YES	490	C50.9	8500/3	NO	0	YES	Post (prior bilateral ovariectomy OR >12 mo since LMP with no prior hysterectomy)	65	No	N0	Stage IIB		FALSE	ccb22ecc-6e18-44b8-ad48-6ab51314b16e	530315de-d048-40f6-b0cc-3c7fb9875e46	LIVING	14	7D2C880F-6897-44A0-9470-5A5B5429A9C0	Alive	FEMALE	TUMOR FREE	NA	0	14	No	WHITE	Primary Tumor
TCGA-D8-A143-01	TCGA-D8-A143		7th	T2	M0	-18984		0.536	172	211	NA	51		14.2	DiseaseFree	Negative	NOT HISPANIC OR LATINO	Core needle biopsy		2011-02-25	C50.9	YES	200	C50.9	8500/3	NO	0	YES	Post (prior bilateral ovariectomy OR >12 mo since LMP with no prior hysterectomy)	39	No	N0	Stage IIA		FALSE	1c40b84e-a0e3-429f-a48c-21566cf881c0	1bab00ca-778e-48ac-ac59-ce2b99d84403	LIVING	14.2	F8C2F3EF-FA73-4FF8-9A4E-7F557E68D560	Alive	FEMALE	TUMOR FREE	NA	0	11	No	WHITE	Primary Tumor
TCGA-D8-A145-01	TCGA-D8-A145		7th	T1c	M0	-29280	manual counting	0.0845	49	191	NA	80		13.5	DiseaseFree	Negative	NOT HISPANIC OR LATINO	Core needle biopsy		2011-02-25	C50.9	YES	190	C50.9	8500/3	NO	0	YES	Post (prior bilateral ovariectomy OR >12 mo since LMP with no prior hysterectomy)	30	No	N1a	Stage IIA		FALSE	4958c36f-1dc7-4f14-9dec-36e14107dbe3	429d3dc6-452e-48fc-9dce-e418317a77d3	LIVING	13.5	1D26CB97-536A-4D10-A593-73C3A846BB13	Alive	FEMALE	TUMOR FREE	NA	1	7	No	WHITE	Primary Tumor
TCGA-D8-A146-01	TCGA-D8-A146		7th	T2	MX	-20861	manual counting	0.164	344	221	NA	57		21.1	DiseaseFree	Negative	NOT HISPANIC OR LATINO	Fine needle aspiration biopsy		2011-03-30	C50.9	YES	230	C50.9	8500/3	NO	0	YES	Post (prior bilateral ovariectomy OR >12 mo since LMP with no prior hysterectomy)	29	Yes	N0	Stage IIA		FALSE	03da7a65-fa2f-42cb-a709-5fe8736f21d3	e8232960-f69e-4491-9cf0-ed7bdcf20031	LIVING	21.1	79749F5D-329A-400D-8511-C4CF479C1FCC	Alive	FEMALE		NA	0	11	Yes	WHITE	Primary Tumor
TCGA-D8-A147-01	TCGA-D8-A147		7th	T2	M0	-16736		0.574	2	163	NA	45		19.2	DiseaseFree	Negative	NOT HISPANIC OR LATINO	Tumor resection		2011-02-27	C50.9	YES	130	C50.9	8500/3	NO	0	YES	Indeterminate (neither Pre or Postmenopausal)	107	No	N0	Stage X		FALSE	fc18d029-9be2-4fa0-9aef-6d647dc55f0b	f984e167-e005-438d-ac04-d4825043b128	LIVING	19.2	380639A2-E89C-4495-8168-82120617129F	Alive	FEMALE		NA	0	1	No	WHITE	Primary Tumor
TCGA-D8-A1J8-01	TCGA-D8-A1J8		7th	T2	M0	-28444		0.898	256	272	NA	77		14.2	DiseaseFree	Negative	NOT HISPANIC OR LATINO	Fine needle aspiration biopsy		2011-03-23	C50.9	YES	260	C50.9	8500/3	NO	0	NO	Post (prior bilateral ovariectomy OR >12 mo since LMP with no prior hysterectomy)	605	No	N1a	Stage IIB		FALSE	62d70067-ff77-4f95-8b69-f537abaf74ce	781d285c-5b2a-4d42-b35e-3840d954070b	LIVING	14.2	E8E799F8-158D-4AEC-8F86-D40F132C071C	Alive	FEMALE	TUMOR FREE	NA	3	16	No	WHITE	Primary Tumor
TCGA-D8-A1J9-01	TCGA-D8-A1J9		7th	T1c	M0	-17879	manual counting	0.357	248	211	NA	48		17.5	DiseaseFree	Negative	NOT HISPANIC OR LATINO	Fine needle aspiration biopsy		2011-03-29	C50.9	YES	230	C50.9	8500/3	NO	0	NO	Post (prior bilateral ovariectomy OR >12 mo since LMP with no prior hysterectomy)	137	No	N0	Stage IA		FALSE	d5e9a403-88ce-40fc-bb85-80cf3f8ff6bc	ed00a16b-6b8e-44e4-998a-ae4dcca5a93c	LIVING	17.5	D80E9389-AAD8-4EEB-9DE0-5DE57B5E5F6B	Alive	FEMALE	TUMOR FREE	NA	0	6	No	WHITE	Primary Tumor
TCGA-D8-A1JA-01	TCGA-D8-A1JA		7th	T4b	M0	-21918	manual counting	0.245	18	194	NA	60		14.2	Recurred/Progressed	Negative	NOT HISPANIC OR LATINO	Other method, specify:	intraoperative examination	2011-03-29	C50.9	YES	310	C50.9	8500/3	NO	0	NO	Post (prior bilateral ovariectomy OR >12 mo since LMP with no prior hysterectomy)	762	No	NX	Stage X		FALSE	9ced0c70-c46c-4f98-8f48-840defe4b8b1	4584c7e2-8011-4231-a5e6-26a264f6d1b1	LIVING	16.5	51A2B7B5-0CDD-427D-BC82-5498810B2641	Alive	FEMALE	TUMOR FREE	NA	NA	NA	No	WHITE	Primary Tumor
TCGA-D8-A1JB-01	TCGA-D8-A1JB		7th	T2	M0	-19822	manual counting	0.0338	0	232	NA	54		18.7	DiseaseFree	Negative	NOT HISPANIC OR LATINO	Fine needle aspiration biopsy		2011-03-29	C50.9	YES	350	C50.9	8500/3	NO	0	YES	Post (prior bilateral ovariectomy OR >12 mo since LMP with no prior hysterectomy)	31	No	N1a	Stage IIB		FALSE	dd96a9c7-899c-47cd-a0f9-b149ed07a5d6	940d64bd-8c96-476f-84f9-678d1ed3500f	LIVING	18.7	27376503-A55C-4905-A885-632440EFCED2	Alive	FEMALE	TUMOR FREE	NA	1	8	No	WHITE	Primary Tumor
TCGA-D8-A1JC-01	TCGA-D8-A1JC		7th	T2	M0	-21898		0.367	178	201	NA	59		15.8	DiseaseFree	Negative	NOT HISPANIC OR LATINO	Other method, specify:	intraoperative examination	2011-03-29	C50.9	YES	180	C50.9	8500/3	NO	0	YES	Post (prior bilateral ovariectomy OR >12 mo since LMP with no prior hysterectomy)	67	No	N2a	Stage IIIA		FALSE	02e6f999-24f2-4ad2-9b92-df3ee2b082e5	3182e60d-be44-4f03-ba0c-431e0c1f1d5e	LIVING	15.8	B4DB830F-BFA4-47F5-94C7-D95984315866	Alive	FEMALE	TUMOR FREE	NA	4	11	No	WHITE	Primary Tumor
TCGA-D8-A1JD-01	TCGA-D8-A1JD		7th	T2	M0	-15166	manual counting	0.469	273	230	NA	41		18.1	DiseaseFree	Negative	NOT HISPANIC OR LATINO	Core needle biopsy		2011-03-29	C50.9	YES	400	C50.9	8500/3	NO	0	NO	Pre (<6 months since LMP AND no prior bilateral ovariectomy AND not on estrogen replacement)	85	No	N1a	Stage IIB		FALSE	530ad151-703d-4638-851f-0b5111ff318b	50111388-1058-413a-ac2a-3fd4f84091aa	LIVING	18.1	332880ED-FE4E-4EE4-9E96-0A61BFCCA27E	Alive	FEMALE	TUMOR FREE	0	3	14	No	WHITE	Primary Tumor
TCGA-D8-A1JE-01	TCGA-D8-A1JE		7th	T1c	M0	-22683	manual counting	0.621	57	238	NA	62		18.9	DiseaseFree	Negative	NOT HISPANIC OR LATINO	Fine needle aspiration biopsy		2011-03-28	C50.9	YES	260	C50.9	8500/3	NO	0	YES	Post (prior bilateral ovariectomy OR >12 mo since LMP with no prior hysterectomy)	29	No	N1a	Stage IIA		FALSE	115bc72c-116f-40c1-be9b-e3dd7650efae	0d7511fd-b57f-4bba-abc2-38b24ba4a15a	LIVING	18.9	746C603E-FB1F-40D7-BEAF-20ACE27D6C21	Alive	FEMALE	TUMOR FREE	NA	3	10	No	WHITE	Primary Tumor
TCGA-D8-A1JF-01	TCGA-D8-A1JF		7th	T1c	M0	-29199		0.414	96	203	NA	79		12	DiseaseFree	Negative	NOT HISPANIC OR LATINO	Other method, specify:	intraoperative examination	2011-03-28	C50.9	YES	180	C50.9	8500/3	NO	0	YES	Post (prior bilateral ovariectomy OR >12 mo since LMP with no prior hysterectomy)	38	No	N2a	Stage IIIA		FALSE	dcd5e079-813a-4c1a-b320-0931468d2bbc	f642ec37-b771-4b55-a133-a54f3b54ac99	LIVING	12	03724E51-8430-414F-B483-2CB92D6A878F	Alive	FEMALE	TUMOR FREE	NA	8	25	No	WHITE	Primary Tumor
TCGA-D8-A1JG-01	TCGA-D8-A1JG		7th	T2	M0	-22878		0.269	187	215	NA	62		12	DiseaseFree	Negative	NOT HISPANIC OR LATINO	Other method, specify:	intraoperative examination	2011-03-28	C50.9	YES	250	C50.9	8500/3	NO	0	YES	Post (prior bilateral ovariectomy OR >12 mo since LMP with no prior hysterectomy)	108	No	N0	Stage IIA		FALSE	7f2a63e6-64d5-4be1-9814-e8416fc9e688	9bd5963e-d8f4-4eed-b32b-2eedb00db268	LIVING	12	4EEB24A6-4812-4592-B7BC-72D400CD4AF3	Alive	FEMALE	TUMOR FREE	NA	0	1	No	WHITE	Primary Tumor
TCGA-D8-A1JH-01	TCGA-D8-A1JH		7th	T1c	M0	-20497	manual counting	6.007e-05	284	263	NA	56		14	DiseaseFree	Negative	NOT HISPANIC OR LATINO	Fine needle aspiration biopsy		2011-03-28	C50.9	YES	140	C50.9	8500/3	NO	0	YES	Post (prior bilateral ovariectomy OR >12 mo since LMP with no prior hysterectomy)	22	No	N0	Stage IA		FALSE	4d1bf9e6-5837-4aed-b568-92f014ed5a4b	8d84c9f4-6f19-42a6-9f55-8b4ccafc6117	LIVING	14	49C79E09-2F69-4089-BFB1-53197DA09A46	Alive	FEMALE	TUMOR FREE	NA	NA	9	No	WHITE	Primary Tumor
TCGA-D8-A1JI-01	TCGA-D8-A1JI		7th	T1c	MX	-20072	manual counting	0.39	21	226	NA	54		19	DiseaseFree	Negative	NOT HISPANIC OR LATINO	Fine needle aspiration biopsy		2011-03-30	C50.9	YES	190	C50.9	8500/3	NO	0	YES	Post (prior bilateral ovariectomy OR >12 mo since LMP with no prior hysterectomy)	29	No	N1a	Stage IIA		FALSE	baf2afc8-f16c-488f-947c-efc9083c6bef	5a4c0145-86eb-40ae-9983-adb13652a9a2	LIVING	19	EF2DC6FB-F026-4025-B148-DF07194914AB	Alive	FEMALE		NA	2	22	No	WHITE	Primary Tumor
TCGA-D8-A1JJ-01	TCGA-D8-A1JJ		7th	T2	M0	-19966	manual counting	0.437	274	260	NA	54		20.1	DiseaseFree	Negative	NOT HISPANIC OR LATINO	Core needle biopsy		2011-03-29	C50.9	YES	240	C50.9	8500/3	NO	0	YES	Post (prior bilateral ovariectomy OR >12 mo since LMP with no prior hysterectomy)	58	No	N0	Stage IIA		FALSE	f7ab565c-83b5-4988-b9be-8a46f65dca8c	ae28fd1e-2445-47ad-8c01-1b47d6396694	LIVING	20.1	3F1DA529-4967-462D-8966-E634D66EB3E1	Alive	FEMALE		NA	0	1	No	WHITE	Primary Tumor
TCGA-D8-A1JK-01	TCGA-D8-A1JK		7th	T2	M0	-32872	manual counting	0.491	109	261	NA	90		20.1	DiseaseFree	Negative	NOT HISPANIC OR LATINO	Fine needle aspiration biopsy		2011-03-29	C50.9	YES	270	C50.9	8500/3	NO	0	YES	Post (prior bilateral ovariectomy OR >12 mo since LMP with no prior hysterectomy)	160	No	N0	Stage IIA		FALSE	56203436-8634-4fd0-96b5-ba6be9d87857	eae4c66c-03a5-4663-a484-a01612602409	LIVING	20.1	1841FEE0-EC36-4EC4-8B5E-6D340C80735B	Alive	FEMALE		NA	0	13	No	WHITE	Primary Tumor
TCGA-D8-A1JL-01	TCGA-D8-A1JL		7th	T2	M0	-26484	manual counting	0.366	265	264	NA	72		20.1	DiseaseFree	Negative	NOT HISPANIC OR LATINO	Fine needle aspiration biopsy		2011-03-29	C50.9	YES	430	C50.9	8500/3	NO	0	YES	Post (prior bilateral ovariectomy OR >12 mo since LMP with no prior hysterectomy)	88	No	N0	Stage IIA		FALSE	aa4244a8-0454-4247-a1c3-357fd51746fa	b32287fb-5ff5-4f5f-a9dc-0c0d514351b4	LIVING	20.1	156DF753-DB3A-4934-9618-1E18CE46C845	Alive	FEMALE		NA	0	11	No	WHITE	Primary Tumor
TCGA-D8-A1JM-01	TCGA-D8-A1JM		7th	T2	M0	-21602	manual counting	0.674	238	243	NA	59		19.4	DiseaseFree	Negative	NOT HISPANIC OR LATINO	Fine needle aspiration biopsy		2011-03-29	C50.9	YES	350	C50.9	8500/3	NO	0	YES	Post (prior bilateral ovariectomy OR >12 mo since LMP with no prior hysterectomy)	36	No	N1a	Stage IIB		FALSE	3e775c99-ceda-4246-8d6f-0f58ca5097c8	c6ba5d28-97b4-4f07-b91c-997b286dff03	LIVING	19.4	947954F1-4CBA-42D3-99B2-6BE6E44E5239	Alive	FEMALE		NA	3	11	No	WHITE	Primary Tumor
TCGA-D8-A1JN-01	TCGA-D8-A1JN		7th	T3	MX	-29331	manual counting	0.126	217	273	NA	80		20.4	DiseaseFree	Negative	NOT HISPANIC OR LATINO	Incisional Biopsy		2011-03-29	C50.9	YES	180	C50.9	8520/3	NO	0	YES	Post (prior bilateral ovariectomy OR >12 mo since LMP with no prior hysterectomy)	115	No	N3a	Stage IIIC		FALSE	28911b97-42bf-4189-9961-522fc0aeebc6	80265a56-75ca-479d-b92b-4fdaeb18ed17	LIVING	20.4	021DF0B3-A535-4AD4-9545-1B9A7BC3E1E6	Alive	FEMALE		NA	11	13	No	WHITE	Primary Tumor
TCGA-D8-A1JP-01	TCGA-D8-A1JP		7th	T1c	M0	-26862	manual counting	0.427	167	292	NA	73		21	DiseaseFree	Negative	NOT HISPANIC OR LATINO	Fine needle aspiration biopsy		2011-03-29	C50.9	YES	430	C50.9	8500/3	NO	0	YES	Post (prior bilateral ovariectomy OR >12 mo since LMP with no prior hysterectomy)	94	No	N0	Stage IA		FALSE	752f4773-5a12-4485-a1f6-896e148ddf4d	bdc13064-e554-4a1e-9037-03187bcb3507	LIVING	21	1B61F1C1-8B19-4D9C-B6B9-87EEE350A472	Alive	FEMALE		NA	NA	1	No	WHITE	Primary Tumor
TCGA-D8-A1JS-01	TCGA-D8-A1JS		7th	T1c	M0	-28178	manual counting	0.0619	105	212	NA	77		12.2	DiseaseFree	Negative	NOT HISPANIC OR LATINO	Other method, specify:	intraoperative examination	2011-03-28	C50.9	YES	190	C50.9	8503/3	NO	0	YES	Post (prior bilateral ovariectomy OR >12 mo since LMP with no prior hysterectomy)	16	No	N0	Stage IA		FALSE	0d03055c-186b-418a-b614-e2035757bc3b	aa5103b4-c25d-4ca4-847b-a1ece4c14aff	LIVING	12.2	0EA57ABF-E3DA-4862-BAB8-A6E36408AC42	Alive	FEMALE	TUMOR FREE	NA	0	13	No	WHITE	Primary Tumor
TCGA-D8-A1JT-01	TCGA-D8-A1JT		7th	T2	M0	-25677		0.415	123	250	NA	70		13.3	DiseaseFree	Negative	NOT HISPANIC OR LATINO	Fine needle aspiration biopsy		2011-03-28	C50.9	YES	250	C50.9	8523/3	NO	0	YES	Post (prior bilateral ovariectomy OR >12 mo since LMP with no prior hysterectomy)	29	No	N0	Stage IIA		FALSE	cd781589-3820-45a2-906b-8d60cd02f3ef	f5678056-2dc2-4f1c-87e9-4fba6c78b460	LIVING	13.3	72AF26A2-FAD0-42FD-A63C-6E8E2597B84E	Alive	FEMALE	TUMOR FREE	NA	0	15	No	WHITE	Primary Tumor
TCGA-D8-A1JU-01	TCGA-D8-A1JU		7th	T1c	M0	-18733	manual counting	0.104	106	295	NA	51		14.7	DiseaseFree	Negative	NOT HISPANIC OR LATINO	Core needle biopsy		2011-03-28	C50.9	YES	450	C50.9	8500/3	NO	0	YES	Post (prior bilateral ovariectomy OR >12 mo since LMP with no prior hysterectomy)	9	No	N0	Stage IA		FALSE	af2a8e2f-2ae1-48bc-bba5-0e2c077c4e48	a56aa062-cc7f-4ceb-96d6-2a6c251fc9b5	LIVING	14.7	B5074D1A-C617-414F-B349-6096F59E122D	Alive	FEMALE	TUMOR FREE	NA	0	1	No	WHITE	Primary Tumor
TCGA-D8-A1X5-01	TCGA-D8-A1X5		7th	T2	MX	-29734	manual counting	0.631	171	197	NA	81		18.6	DiseaseFree	Negative	NOT HISPANIC OR LATINO	Fine needle aspiration biopsy		2011-06-09	C50.9	YES	240	C50.9	8500/3	NO	0	YES	Post (prior bilateral ovariectomy OR >12 mo since LMP with no prior hysterectomy)	39	No	N3a	Stage IIIC		FALSE	eb93df3d-9e25-4e4c-9a5d-350f296e5acf	ae5c9a58-e3ae-420f-8f72-1e4ffdd3df24	LIVING	18.6	449F70F0-DFE1-40F9-879D-43283CFAF525	Alive	FEMALE	TUMOR FREE	NA	14	16	No	WHITE	Primary Tumor
TCGA-D8-A1X6-01	TCGA-D8-A1X6		7th	T3	MX	-29256	manual counting	0.362	236	173	NA	80		17.8	DiseaseFree	Negative	NOT HISPANIC OR LATINO	Fine needle aspiration biopsy		2011-06-09	C50.9	YES	550	C50.9	8500/3	NO	0	YES	Post (prior bilateral ovariectomy OR >12 mo since LMP with no prior hysterectomy)	40	No	N2a	Stage IIIA		FALSE	42e47f3a-dff7-41e4-8f84-146d97e8ab72	63963cdd-909a-47d8-bae5-965aa9d1cb99	LIVING	17.8	880A4D38-40C5-46C3-8EE7-36539DD64773	Alive	FEMALE	TUMOR FREE	NA	5	7	No	WHITE	Primary Tumor
TCGA-D8-A1X7-01	TCGA-D8-A1X7		7th	T2	MX	-14858	manual counting	0.0853	85	141	NA	40		16.7	DiseaseFree	Negative	NOT HISPANIC OR LATINO	Fine needle aspiration biopsy		2011-06-09	C50.9	YES	170	C50.9	8503/3	NO	0	YES	Pre (<6 months since LMP AND no prior bilateral ovariectomy AND not on estrogen replacement)	23	No	N0	Stage IIA		FALSE	cdab777e-62de-4d51-92af-b6eb089c111f	70d8df1b-251c-4b3d-9de8-c20facd4cad8	LIVING	16.7	D3EA3547-7E53-442E-A957-B2DD7EBAFBB9	Alive	FEMALE		NA	0	3	No	WHITE	Primary Tumor
TCGA-D8-A1X8-01	TCGA-D8-A1X8		7th	T1c	M0	-22995	% IHC	0.115	272	225	NA	62		25.7	DiseaseFree	Negative	NOT HISPANIC OR LATINO	Fine needle aspiration biopsy		2011-05-16	C50.9	YES	360	C50.9	8520/3	NO	0	YES	Post (prior bilateral ovariectomy OR >12 mo since LMP with no prior hysterectomy)	20	No	N2a	Stage IIIA		FALSE	8624354c-af25-423c-9c71-48a5dd821097	b4402906-2bfa-4b75-b479-4e660556fbe5	LIVING	25.7	5F1C3B85-5E5C-428B-8779-3A5878DCE1F2	Alive	FEMALE	TUMOR FREE	0	9	11	No	WHITE	Primary Tumor
TCGA-D8-A1X9-01	TCGA-D8-A1X9		7th	T2	M0	-24417	% IHC	0.282	380	399	NA	66		23.9	DiseaseFree		NOT HISPANIC OR LATINO	Core needle biopsy		2011-05-16	C50.9	YES	170	C50.9	8500/3	NO	0	YES	Post (prior bilateral ovariectomy OR >12 mo since LMP with no prior hysterectomy)	77	No	N1a	Stage IIB		FALSE	34a74805-300c-4773-ab59-2085fcc2e6cc	eee3738e-89d5-41be-8f9d-564e46b4e065	LIVING	23.9	E69CF3E3-4799-4892-87E9-4291B14A1B9C	Alive	FEMALE	TUMOR FREE	0	3	23	No	WHITE	Primary Tumor
TCGA-D8-A1XA-01	TCGA-D8-A1XA		7th	T1c	M0	-23387	% IHC	0.861	274	218	NA	64		27.6	DiseaseFree	Negative	NOT HISPANIC OR LATINO	Other method, specify:	intraoperative examination	2011-05-18	C50.9	YES	140	C50.9	8500/3	NO	0	YES	Post (prior bilateral ovariectomy OR >12 mo since LMP with no prior hysterectomy)	22	No	N0	Stage IA		FALSE	739cb132-51e9-41be-8064-311a13da0d74	4068463b-8568-4bdb-8db0-19390ec0c7f8	LIVING	27.6	9320030D-5E19-4BEE-99DA-366B6762DED1	Alive	FEMALE	TUMOR FREE	0	0	1	No	WHITE	Primary Tumor
TCGA-D8-A1XB-01	TCGA-D8-A1XB		7th	T2	M0	-22976	% IHC	0.217	201	251	NA	62		18.1	DiseaseFree	Negative	NOT HISPANIC OR LATINO	Core needle biopsy		2011-05-16	C50.9	YES	210	C50.9	8500/3	NO	0	YES	Post (prior bilateral ovariectomy OR >12 mo since LMP with no prior hysterectomy)	27	No	N1a	Stage IIB		FALSE	d2694b09-7844-4496-865c-5d3d8cd03330	5faa442d-a995-48aa-a52c-a7efe6f56cab	LIVING	18.1	B7367E27-2A40-4E8F-8975-D5665E6506D9	Alive	FEMALE	TUMOR FREE	0	1	10	No	WHITE	Primary Tumor
TCGA-D8-A1XC-01	TCGA-D8-A1XC		7th	T4b	M0	-31220	% IHC	0.0566	81	215	NA	85		14.7	Recurred/Progressed	Negative	NOT HISPANIC OR LATINO	Other method, specify:	intraoperative examination	2011-05-16	C50.9	YES	260	C50.9	8480/3	NO	0	YES	Post (prior bilateral ovariectomy OR >12 mo since LMP with no prior hysterectomy)	28	No	N1a	Stage IIIB		FALSE	ee14e049-b891-4dda-a730-8ce99bd93baf	7fb4bff6-4385-4503-9016-f9b620af3f8c	DECEASED	12.4	E5D2E429-C41C-47E2-96CB-F3B6F412499B	Dead	FEMALE	TUMOR FREE	0	1	20	No	WHITE	Primary Tumor
TCGA-D8-A1XD-01	TCGA-D8-A1XD		7th	T1c	M0	-13510	% IHC	0.148	155	188	NA	36		17.1	DiseaseFree	Negative	NOT HISPANIC OR LATINO	Core needle biopsy		2011-05-16	C50.9	YES	210	C50.9	8500/3	NO	0	YES	Pre (<6 months since LMP AND no prior bilateral ovariectomy AND not on estrogen replacement)	NA	No	N2a	Stage IIIA		FALSE	c4699748-f01d-4b30-9c74-1ca77fb84ac1	bc220c5a-7255-40be-9c68-2997f0b0d319	LIVING	17.1	D5614445-4EBF-4050-8FC6-D34D5CAADD82	Alive	FEMALE	TUMOR FREE	NA	6	18	No	WHITE	Primary Tumor
TCGA-D8-A1XF-01	TCGA-D8-A1XF		7th	T2	M0	-16787	% IHC	0.672	97	170	NA	45		15.2	DiseaseFree		NOT HISPANIC OR LATINO	Other method, specify:	intraoperative examination	2011-05-16	C50.9	YES	180	C50.9	8500/3	NO	0	YES	Pre (<6 months since LMP AND no prior bilateral ovariectomy AND not on estrogen replacement)	35	No	N0	Stage IIA		FALSE	6f6afd31-b5dd-48ab-b18f-6390ba18a5f0	3b675bbd-b18e-4b72-b3c3-30527a9c157a	LIVING	15.2	FCBB54EB-6FBF-4DC4-B4D5-DB533687FA58	Alive	FEMALE	TUMOR FREE	0	0	8	No	WHITE	Primary Tumor
TCGA-D8-A1XG-01	TCGA-D8-A1XG		7th	T4b	M0	-31748	% IHC	0.153	75	169	NA	86		14.7	DiseaseFree	Negative	NOT HISPANIC OR LATINO	Other method, specify:	intraoperative examination	2011-05-16	C50.9	YES	590	C50.9	8500/3	NO	0	YES	Post (prior bilateral ovariectomy OR >12 mo since LMP with no prior hysterectomy)	25	No	N1a	Stage IIIB		FALSE	de531604-bd1a-49df-96c2-6de3ae703f1d	be145e7b-25ee-409a-8c9c-5e17c9b6c5aa	LIVING	14.7	AA869507-1B46-4812-8EC5-A4E01C588E6E	Alive	FEMALE	TUMOR FREE	0	2	2	No	WHITE	Primary Tumor
TCGA-D8-A1XJ-01	TCGA-D8-A1XJ		7th	T3	MX	-27967	manual counting	0.353	352	295	NA	76		21.8	DiseaseFree	Negative	NOT HISPANIC OR LATINO	Fine needle aspiration biopsy		2011-06-09	C50.9	YES	440	C50.9	8523/3	NO	0	YES	Post (prior bilateral ovariectomy OR >12 mo since LMP with no prior hysterectomy)	70	No	N1a	Stage IIIA		FALSE	cc510968-fe52-4109-a79f-74f216b48c78	989450c7-cf32-4ed9-a74e-259a9be428ac	LIVING	21.8	EEA126DE-A667-4373-9DC5-96B55E4ABF07	Alive	FEMALE	TUMOR FREE	NA	2	43	No	WHITE	Primary Tumor
TCGA-D8-A1XK-01	TCGA-D8-A1XK		7th	T2	MX	-20092		0.639	326	275	NA	55		14.5	DiseaseFree	Negative	NOT HISPANIC OR LATINO	Fine needle aspiration biopsy		2011-06-09	C50.9	YES	260	C50.9	8500/3	NO	0	YES	Post (prior bilateral ovariectomy OR >12 mo since LMP with no prior hysterectomy)	889	No	N1a	Stage IIB		FALSE	97943d87-fed7-4f14-a0a7-c5bfee64c392	41af42ec-7521-4783-916e-2c982eef0f98	LIVING	14.5	B3DB4F9E-C91B-4913-93E8-F18FF22CBA7C	Alive	FEMALE	TUMOR FREE	NA	3	18	No	WHITE	Primary Tumor
TCGA-D8-A1XL-01	TCGA-D8-A1XL		7th	T2	MX	-12668	manual counting	0.547	319	282	NA	34		19.9	DiseaseFree	Negative	NOT HISPANIC OR LATINO	Fine needle aspiration biopsy		2011-06-09	C50.9	YES	260	C50.9	8500/3	NO	0	YES	Pre (<6 months since LMP AND no prior bilateral ovariectomy AND not on estrogen replacement)	91	No	N1a	Stage IIB		FALSE	2b19a6b4-7a17-4452-b4aa-6fc18adc0c3c	e5053de2-2a3b-4559-a166-35df5386d644	LIVING	19.9	762963FB-3D8C-4616-8C8C-0CD3E45FD243	Alive	FEMALE	TUMOR FREE	NA	2	13	No	WHITE	Primary Tumor
TCGA-D8-A1XM-01	TCGA-D8-A1XM		7th	T1c	M0	-21056	% IHC	0.167	218	189	NA	57		17.7	DiseaseFree	Negative	NOT HISPANIC OR LATINO	Fine needle aspiration biopsy		2011-05-16	C50.9	YES	200	C50.9	8500/3	NO	0	YES	Post (prior bilateral ovariectomy OR >12 mo since LMP with no prior hysterectomy)	42	No	N0	Stage IA		FALSE	92529232-8504-4541-b7e2-4df8f497c413	086eac10-6ea8-4cc4-a6e5-91f051e50c54	LIVING	17.7	7E48315C-3717-40DB-8773-71D070AFC47B	Alive	FEMALE	TUMOR FREE	0	0	1	No	WHITE	Primary Tumor
TCGA-D8-A1XO-01	TCGA-D8-A1XO		7th	T2	M0	-20606	% IHC	0.232	242	193	NA	56		7.95	DiseaseFree	Negative	NOT HISPANIC OR LATINO	Core needle biopsy		2011-05-16	C50.9	YES	360	C50.9	8520/3	NO	0	YES	Post (prior bilateral ovariectomy OR >12 mo since LMP with no prior hysterectomy)	12	No	N1a	Stage IIB		FALSE	6a186809-3422-41d0-83d2-867145830936	633ef184-2257-4cbd-90e8-64e92d91abb2	LIVING	7.95	9AAB53EC-89A0-4878-BB9D-D96BC56B54C4	Alive	FEMALE	TUMOR FREE	0	1	10	No	WHITE	Primary Tumor
TCGA-D8-A1XQ-01	TCGA-D8-A1XQ		7th	T2	M0	-25345	% IHC	0.339	177	158	NA	69		16.4	DiseaseFree	Negative	NOT HISPANIC OR LATINO	Core needle biopsy		2011-05-16	C50.9	YES	100	C50.9	8500/3	NO	0	YES	Post (prior bilateral ovariectomy OR >12 mo since LMP with no prior hysterectomy)	677	No	N0	Stage IIA		FALSE	3886b4fb-ba22-4a50-b11a-a6893951f170	93324982-7cfa-477c-88a0-b6eef61f6ca2	LIVING	16.4	33B6269D-1D59-4184-A786-2BEB73F6D3A8	Alive	FEMALE	TUMOR FREE	0	0	7	No	WHITE	Primary Tumor
TCGA-D8-A1XR-01	TCGA-D8-A1XR		7th	T2	M0	-20488	% IHC	0.217	168	162	NA	56		15.8	DiseaseFree	Negative	NOT HISPANIC OR LATINO	Core needle biopsy		2011-05-16	C50.9	YES	170	C50.9	8500/3	NO	0	YES	Post (prior bilateral ovariectomy OR >12 mo since LMP with no prior hysterectomy)	21	No	N1a	Stage IIB		FALSE	70f34c5c-3671-44c8-9469-99f9786efec1	a582257d-4bf7-416b-a465-29a3220bc8c3	LIVING	15.8	D9A0E659-99BC-4704-AC85-E63098BA731D	Alive	FEMALE	TUMOR FREE	0	2	7	No	WHITE	Primary Tumor
TCGA-D8-A1XS-01	TCGA-D8-A1XS		7th	T2	M0	-17708	% IHC	0.221	50	164	NA	48		16.3	DiseaseFree	Negative	NOT HISPANIC OR LATINO	Core needle biopsy		2011-05-16	C50.9	YES	340	C50.9	8507/3	NO	0	YES		15	No	N3a	Stage IIIC		FALSE	1026e0bf-5640-4fa5-b65f-4f11e8e76b18	ef5821f3-677a-4bd3-9d99-d9cdd533cdb5	LIVING	16.3	6C97C157-05A0-45CE-91E9-3DC8946EFEDE	Alive	MALE	TUMOR FREE	0	25	28	No	WHITE	Primary Tumor
TCGA-D8-A1XT-01	TCGA-D8-A1XT		7th	T1c	M0	-22448	% IHC	0.394	193	144	NA	61		6.34	DiseaseFree	Negative	NOT HISPANIC OR LATINO	Fine needle aspiration biopsy		2011-05-16	C50.9	YES	230	C50.9	8500/3	NO	0	YES	Post (prior bilateral ovariectomy OR >12 mo since LMP with no prior hysterectomy)	39	No	N1a	Stage IIA		FALSE	64975923-d032-4182-8565-59fc37127d8d	b58f47b2-c3ce-49a2-9bd2-f4c2cbda734c	LIVING	6.34	99050E48-8DFE-4405-B8D8-7649CE2C9CFF	Alive	FEMALE	TUMOR FREE	0	3	10	No	WHITE	Primary Tumor
TCGA-D8-A1XU-01	TCGA-D8-A1XU		7th	T1c	M0	-20715	% IHC	0.947	150	102	NA	56		13	DiseaseFree	Negative	NOT HISPANIC OR LATINO	Core needle biopsy		2011-05-16	C50.9	YES	210	C50.9	8500/3	NO	0	YES	Post (prior bilateral ovariectomy OR >12 mo since LMP with no prior hysterectomy)	22	No	N0	Stage IA		FALSE	332148f5-f070-4c20-8eb1-4d8c0673aa52	4fbe5e67-d18a-48d5-bd88-19a2f4c01c8d	LIVING	13	845F8FCF-CF3C-4CEF-B673-A57DE626939C	Alive	FEMALE	TUMOR FREE	0	0	1	No	WHITE	Primary Tumor
TCGA-D8-A1XV-01	TCGA-D8-A1XV		7th	T2	M0	-30830	% IHC	0.0342	147	103	NA	84		15.1	DiseaseFree	Negative	NOT HISPANIC OR LATINO	Fine needle aspiration biopsy		2011-05-16	C50.9	YES	420	C50.9	8480/3	NO	0	YES	Post (prior bilateral ovariectomy OR >12 mo since LMP with no prior hysterectomy)	23	No	N0	Stage IIA		FALSE	87b85935-a058-44ad-8fb6-8511130eaffe	a9d130f4-84e6-4f3c-982f-69971b5b7a46	LIVING	15.1	D3AC6B8A-CC8F-475C-BD2E-A869BD07D94C	Alive	FEMALE	TUMOR FREE	0	0	1	No	WHITE	Primary Tumor
TCGA-D8-A1XW-01	TCGA-D8-A1XW		7th	T2	M0	-19478	% IHC	0.38	118	76	NA	53		12.7	DiseaseFree	Negative	NOT HISPANIC OR LATINO	Fine needle aspiration biopsy		2011-05-16	C50.9	YES	310	C50.9	8500/3	NO	0	YES	Post (prior bilateral ovariectomy OR >12 mo since LMP with no prior hysterectomy)	76	No	N0	Stage IIA		FALSE	887b9e5b-99db-44ac-9c30-c0dc6877b41c	48c16c0d-085f-4266-b729-13bfd7aa9dab	LIVING	12.7	BD71F606-58BC-46B9-8A03-CB25D5BECA96	Alive	FEMALE	TUMOR FREE	0	0	1	No	WHITE	Primary Tumor
TCGA-D8-A1XY-01	TCGA-D8-A1XY		7th	T2	MX	-27106	manual counting	0.314	81	135	NA	74		16.5	DiseaseFree		NOT HISPANIC OR LATINO	Fine needle aspiration biopsy		2011-06-09	C50.9	YES	190	C50.9	8500/3	NO	0	YES	Post (prior bilateral ovariectomy OR >12 mo since LMP with no prior hysterectomy)	33	No	N0	Stage IIA		FALSE	0130d616-885e-4a6c-9d03-2f17dd692a05	c216cce6-3e13-466e-942d-348f9f803ab2	LIVING	16.5	9D1EDFE8-FA4E-4F6C-99E9-1FEB12175D6C	Alive	FEMALE	TUMOR FREE	NA	0	3	No	WHITE	Primary Tumor
TCGA-D8-A1XZ-01	TCGA-D8-A1XZ		7th	T1c	MX	-29916	manual counting	0.356	121	98	NA	81		15.3	DiseaseFree	Negative	NOT HISPANIC OR LATINO	Fine needle aspiration biopsy		2011-06-09	C50.9	YES	130	C50.9	8500/3	NO	0	YES	Post (prior bilateral ovariectomy OR >12 mo since LMP with no prior hysterectomy)	54	No	N2a	Stage IIIA		FALSE	2c90d5e3-ac8c-4c86-a06f-42ccc064eb49	eadfbcf9-0058-4021-8dde-7296d441e42f	LIVING	15.3	1D6EE39C-DE75-4595-943A-CF53873F96BF	Alive	FEMALE	TUMOR FREE	NA	6	14	No	WHITE	Primary Tumor
TCGA-D8-A1Y0-01	TCGA-D8-A1Y0		7th	T1c	MX	-24083	manual counting	0.385	167	104	NA	65		15.5	DiseaseFree		NOT HISPANIC OR LATINO	Incisional Biopsy		2011-06-09	C50.9	YES	190	C50.9	8500/3	NO	0	YES	Post (prior bilateral ovariectomy OR >12 mo since LMP with no prior hysterectomy)	56	No	N2a	Stage IIIA		FALSE	ced2c048-b047-43ff-b0e7-cd7ad480850c	92f1452b-54af-408f-98a8-cd76191f472b	LIVING	15.5	53ED4388-8CD2-4925-81A9-9C4792C83566	Alive	FEMALE	TUMOR FREE	NA	9	15	No	WHITE	Primary Tumor
TCGA-D8-A1Y1-01	TCGA-D8-A1Y1		7th	T3	MX	-29474	manual counting	0.533	116	93	NA	80		NA			NOT HISPANIC OR LATINO	Fine needle aspiration biopsy		2011-06-09	C50.9	YES	200	C50.9	8500/3	NO	0	YES	Post (prior bilateral ovariectomy OR >12 mo since LMP with no prior hysterectomy)	201	No	N1a	Stage IIIA		FALSE	38a631a1-6875-4216-a335-ee93c90a86d6	4c7ed667-0015-48e5-a262-cabd54a35244	DECEASED	9.92	1B198706-8844-452A-8F5B-8880A239717C	Dead	FEMALE		NA	1	22	No	WHITE	Primary Tumor
TCGA-D8-A1Y2-01	TCGA-D8-A1Y2		7th	T2	MX	-26021	manual counting	0.309	73	65	NA	71		14.2	DiseaseFree	Negative	NOT HISPANIC OR LATINO	Fine needle aspiration biopsy		2011-06-09	C50.9	YES	470	C50.9	8500/3	NO	0	YES	Post (prior bilateral ovariectomy OR >12 mo since LMP with no prior hysterectomy)	20	No	N0	Stage IIA		FALSE	c7d7a770-23c0-4310-ab48-1f6152dc2849	4c6bdfb2-3438-4216-b76d-d87c386bfa96	LIVING	14.2	4ACD42D6-9520-4DC6-BB40-9187A4D49981	Alive	FEMALE	TUMOR FREE	NA	0	7	No	WHITE	Primary Tumor
TCGA-D8-A1Y3-01	TCGA-D8-A1Y3		7th	T2	MX	-22317	manual counting	0.612	125	62	NA	61		14.1	DiseaseFree	Negative	NOT HISPANIC OR LATINO	Fine needle aspiration biopsy		2011-06-09	C50.9	YES	300	C50.9	8500/3	NO	0	YES	Post (prior bilateral ovariectomy OR >12 mo since LMP with no prior hysterectomy)	46	No	N2a	Stage IIIA		FALSE	632984bd-dc81-42b6-b024-476cfd0bb2ae	9ae58006-9650-4494-991a-6ee217331740	LIVING	14.1	E8D4229D-5049-4991-BDE0-AFC2CBC1827E	Alive	FEMALE	TUMOR FREE	NA	5	8	No	WHITE	Primary Tumor
TCGA-D8-A27E-01	TCGA-D8-A27E		7th	T1c	M0	-24315	manual counting	0.0001408	182	204	NA	66		17.4	DiseaseFree	Negative	NOT HISPANIC OR LATINO	Fine needle aspiration biopsy		2011-07-21	C50.9	YES	110	C50.9	8523/3	NO	0	YES	Post (prior bilateral ovariectomy OR >12 mo since LMP with no prior hysterectomy)	9	No	N0	Stage IA		FALSE	680f23a9-fcce-493e-b908-27c1ad202e4c	0190a751-0a1f-4911-b5dd-26964b7fa5a5	LIVING	17.4	36F6CB19-17FE-47FA-BFCA-3846578C028B	Alive	FEMALE	TUMOR FREE	NA	0	1	No	WHITE	Primary Tumor
TCGA-D8-A27F-01	TCGA-D8-A27F		7th	T2	M0	-14731		0.67	106	166	NA	40		16	DiseaseFree	Negative	NOT HISPANIC OR LATINO	Other method, specify:	intraoperative examination	2011-07-18	C50.9	YES	320	C50.9	8500/3	NO	0	YES	Pre (<6 months since LMP AND no prior bilateral ovariectomy AND not on estrogen replacement)	48	No	N0	Stage IIA		FALSE	1549dc64-3dab-43fc-96e9-b07d520957e1	7e9145f7-ccff-4132-b2b7-9b992eebebf4	LIVING	16	976C6F9E-DDCB-42F4-BD2C-A4D715396B47	Alive	FEMALE	TUMOR FREE	0	0	11	No	WHITE	Primary Tumor
TCGA-D8-A27G-01	TCGA-D8-A27G		7th	T2	M0	-27521	manual counting	0.108	210	156	NA	75		13.4	DiseaseFree	Negative	NOT HISPANIC OR LATINO	Core needle biopsy		2011-07-18	C50.9	YES	170	C50.9	8520/3	NO	0	YES	Post (prior bilateral ovariectomy OR >12 mo since LMP with no prior hysterectomy)	813	No	N0	Stage IIA		FALSE	6f6e7356-3521-4674-8eec-ad01340d4b8e	e11babda-c07c-4406-85ed-0b1d45985017	LIVING	13.4	F8B8EEB1-0603-4181-9BD3-209143024EF8	Alive	FEMALE	TUMOR FREE	0	0	31	No	WHITE	Primary Tumor
TCGA-D8-A27H-01	TCGA-D8-A27H		7th	T2	M0	-26588		0.482	19	84	NA	72		13	DiseaseFree	Negative	NOT HISPANIC OR LATINO	Other method, specify:	intraoperative examination	2011-07-18	C50.9	YES	170	C50.9	8520/3	NO	0	YES	Post (prior bilateral ovariectomy OR >12 mo since LMP with no prior hysterectomy)	103	No	N0	Stage IIA		FALSE	0dca98b0-f43e-45b6-9a02-00092c78678c	b7542984-1410-45e6-b936-8333ff902eb4	LIVING	13	52D7E980-806C-499D-9DB9-40E1D651D9EB	Alive	FEMALE	TUMOR FREE	NA	NA	1	No	WHITE	Primary Tumor
TCGA-D8-A27I-01	TCGA-D8-A27I		7th	T1c	M0	-21327	manual counting	0.0458	186	132	NA	58		14.4	DiseaseFree	Negative	NOT HISPANIC OR LATINO	Core needle biopsy		2011-07-18	C50.9	YES	900	C50.9	8523/3	NO	0	YES	Post (prior bilateral ovariectomy OR >12 mo since LMP with no prior hysterectomy)	33	No	N2a	Stage IIIA		FALSE	9c55032f-4db7-4026-ae83-8d060dd8e3fe	be694dea-a16a-4841-9588-89bba1b37dc6	LIVING	14.4	FAB622C2-3E45-4E72-AA36-9530BB830993	Alive	FEMALE	TUMOR FREE	0	4	10	No	WHITE	Primary Tumor
TCGA-D8-A27K-01	TCGA-D8-A27K		7th	T2	M0	-17426	manual counting	0.115	119	77	NA	47		9.43	DiseaseFree	Negative	NOT HISPANIC OR LATINO	Fine needle aspiration biopsy		2011-07-18	C50.9	YES	190	C50.9	8500/3	NO	0	YES	Post (prior bilateral ovariectomy OR >12 mo since LMP with no prior hysterectomy)	23	No	N1a	Stage IIB		FALSE	7f97971b-2818-4e4b-9c9e-7c0246f9484c	9e163b4c-d624-4c71-9d68-8f002aee6fec	LIVING	9.43	6B2ADF84-5CEA-430A-87DD-5C2EC24C6E90	Alive	FEMALE	TUMOR FREE	NA	2	17	No	WHITE	Primary Tumor
TCGA-D8-A27L-01	TCGA-D8-A27L		7th	T1c	M0	-18025	manual counting	0.111	126	84	NA	49		16.4	DiseaseFree	Negative	NOT HISPANIC OR LATINO	Core needle biopsy		2011-07-18	C50.9	YES	220	C50.9	8500/3	NO	0	YES	Post (prior bilateral ovariectomy OR >12 mo since LMP with no prior hysterectomy)	29	No	N2a	Stage IIIA		FALSE	6020d1b4-ee20-4cc9-82a3-340b5e3122f1	29ba933a-c5f0-4637-b741-ee9739f02cd2	LIVING	16.4	1281F503-C256-4DFF-A3BD-BD5E51CE4249	Alive	FEMALE	TUMOR FREE	NA	2	16	No	WHITE	Primary Tumor
TCGA-D8-A27M-01	TCGA-D8-A27M		7th	T1c	M0	-21910		0.298	145	83	NA	59		13.5	DiseaseFree	Negative	NOT HISPANIC OR LATINO	Fine needle aspiration biopsy		2011-07-17	C50.9	YES	140	C50.9	8500/3	NO	0	YES	Post (prior bilateral ovariectomy OR >12 mo since LMP with no prior hysterectomy)	68	No	N0	Stage IA		FALSE	ae65baeb-6b78-492a-8c63-bb7e93e83dc2	d4371446-8326-4e35-9e86-d8a48393efae	LIVING	13.5	85045216-10EC-473C-96A9-268E71D2B566	Alive	FEMALE	TUMOR FREE	NA	NA	1	No	WHITE	Primary Tumor
TCGA-D8-A27N-01	TCGA-D8-A27N		7th	T2	M0	-13243	manual counting	0.253	146	75	NA	36		4.8	DiseaseFree	Negative	NOT HISPANIC OR LATINO	Core needle biopsy		2011-07-18	C50.9	YES	170	C50.9	8500/3	NO	0	YES	Pre (<6 months since LMP AND no prior bilateral ovariectomy AND not on estrogen replacement)	37	No	N2a	Stage IIIA		FALSE	d5be2ab3-f748-480d-954b-385cf01b4c81	4f69c5f3-4e8c-4b71-a5fe-3179412c17e6	LIVING	4.8	69007BC0-E1DF-4E68-BA6A-352F6A12F233	Alive	FEMALE	TUMOR FREE	0	4	19	No	WHITE	Primary Tumor
TCGA-D8-A27P-01	TCGA-D8-A27P		7th	T1c	M0	-23576	manual counting	0.0485	23	37	NA	64		0.76	DiseaseFree	Negative	NOT HISPANIC OR LATINO	Other method, specify:	intraoperative examination	2011-07-18	C50.9	YES	100	C50.9	8500/3	NO	0	YES	Post (prior bilateral ovariectomy OR >12 mo since LMP with no prior hysterectomy)	19	No	N0	Stage IA		FALSE	c54d5507-bba5-4a1e-8885-3c3b1eed13c1	6fe6d586-3b5d-4cd4-acb8-5691936441b9	LIVING	0.76	ACC0A0E7-218F-4112-AC74-9F5D5A512DD3	Alive	FEMALE	TUMOR FREE	NA	0	1	No	WHITE	Primary Tumor
TCGA-D8-A27R-01	TCGA-D8-A27R		7th	T2	M0	-15122	manual counting	0.355	29	50	NA	41		10.1	DiseaseFree	Negative	NOT HISPANIC OR LATINO	Core needle biopsy		2011-07-18	C50.9	YES	440	C50.9	8500/3	NO	0	YES	Post (prior bilateral ovariectomy OR >12 mo since LMP with no prior hysterectomy)	27	No	N3a	Stage IIIC		FALSE	0b23b5fe-6c7e-4297-bc55-f93fcb830ac4	b10e80e2-6ded-42f8-beab-b436e0286be1	LIVING	10.1	5E997487-9A03-4723-B1E6-FA0B557D8FDF	Alive	FEMALE	TUMOR FREE	NA	11	11	No	WHITE	Primary Tumor
TCGA-D8-A27T-01	TCGA-D8-A27T		7th	T2	M0	-19591	manual counting	0.192	136	68	NA	53		13.1	DiseaseFree	Negative	NOT HISPANIC OR LATINO	Core needle biopsy		2011-07-21	C50.9	YES	170	C50.9	8520/3	NO	0	YES	Post (prior bilateral ovariectomy OR >12 mo since LMP with no prior hysterectomy)	19	No	N3a	Stage IIIC		FALSE	27c1c094-690b-4973-8900-a797ad88f98c	0f6ed829-a59b-48b7-a2ca-3aa9db40e4c2	LIVING	13.1	15237FF6-A56E-4E05-B81D-B87E91B59917	Alive	FEMALE	TUMOR FREE	NA	12	12	No	WHITE	Primary Tumor
TCGA-D8-A27V-01	TCGA-D8-A27V		7th	T2	M0	-22958	manual counting	0.377	73	51	NA	62		12.5	DiseaseFree	Negative	NOT HISPANIC OR LATINO	Fine needle aspiration biopsy		2011-07-21	C50.9	YES	230	C50.9	8520/3	NO	0	YES	Post (prior bilateral ovariectomy OR >12 mo since LMP with no prior hysterectomy)	166	No	N0	Stage IIA		FALSE	AD6D26AB-6568-40DB-BFB0-394D40E801CF	D32E480B-D1EE-4BAE-AF15-8B5B94C1CC8A	LIVING	12.5	E5011BD1-E1DE-4A47-BF3C-66BA1E0B84DC	Alive	FEMALE	TUMOR FREE	NA	0	2	No	WHITE	Primary Tumor
TCGA-D8-A27W-01	TCGA-D8-A27W		7th	T4b	M0	-20173	manual counting	0.445	15	43	NA	55		12.3	DiseaseFree	Negative	NOT HISPANIC OR LATINO	Fine needle aspiration biopsy		2011-07-21	C50.9	YES	390	C50.9	8480/3	NO	0	YES	Post (prior bilateral ovariectomy OR >12 mo since LMP with no prior hysterectomy)	22	No	N0	Stage IIIB		FALSE	bfa3dbc0-361c-400e-8c10-0aca7049fce9	e1c492c0-cf81-445d-8aa2-a8e8068ead1d	LIVING	12.3	292571E3-D500-4337-B435-834B504F3109	Alive	FEMALE	TUMOR FREE	NA	0	12	No	WHITE	Primary Tumor
TCGA-E2-A105-01	TCGA-E2-A105			T2	M0	-28855	Allred score 3 + 2 = 5	0.135	1163	1171	NA	79		43	DiseaseFree	Negative	NOT HISPANIC OR LATINO	Core needle biopsy		2011-02-11	C50.9	YES	120	C50.9	8500/3	NO	0		Post (prior bilateral ovariectomy OR >12 mo since LMP with no prior hysterectomy)	53	No	N0 (i-)	Stage IIA		FALSE	b0bcb829-cee0-4247-bb75-093a5bea89ee	daf94b80-d57a-4525-be1d-6ca0f83204e3	LIVING	43	252A2D12-EC16-459E-8486-7814FF39E6C2	Alive	FEMALE	TUMOR FREE	NA	0	1	No	WHITE	Primary Tumor
TCGA-E2-A107-01	TCGA-E2-A107			T3	M0	-20065	Allred score 5+3=8	0.33	763	715	NA	54		34.4	DiseaseFree	Negative	NOT HISPANIC OR LATINO	Core needle biopsy		2011-02-11	C50.9	YES	170	C50.9	8520/3	NO	0		Post (prior bilateral ovariectomy OR >12 mo since LMP with no prior hysterectomy)	23	No	N2a	Stage IIIA		FALSE	eff2360e-399a-4167-ab2b-798e27bef739	22848a4a-ed0d-4efb-850f-a49f11cd77ec	LIVING	34.4	BA87D188-A3B3-4A6F-B3AF-1FEB25B9E357	Alive	FEMALE	WITH TUMOR	NA	4	27	No	WHITE	Primary Tumor
TCGA-E2-A108-01	TCGA-E2-A108			T2	M0	-23530	Allred score 7 (outside facility)	0.0338	124	596	NA	64		27.5	DiseaseFree	Negative	NOT HISPANIC OR LATINO	Core needle biopsy		2011-02-11	C50.9	YES	280	C50.9	8500/3	NO	0		Post (prior bilateral ovariectomy OR >12 mo since LMP with no prior hysterectomy)	69	No	N2a	Stage IIIA		FALSE	4f04bd10-9902-4a23-b15d-4f4409d79499	24e9d23a-1340-4074-9268-ca85896569cf	LIVING	27.5	DDBEE56C-F8E8-4A7D-8CF6-E0D63EE53FC4	Alive	FEMALE		NA	4	27	No	WHITE	Primary Tumor
TCGA-E2-A109-01	TCGA-E2-A109			T2	M0	-23521	Allred score 5+3=8	0.443	1172	1155	NA	64		46.5	DiseaseFree	Negative	NOT HISPANIC OR LATINO	Core needle biopsy		2011-02-11	C50.9	YES	190	C50.4	8500/3	NO	0		Post (prior bilateral ovariectomy OR >12 mo since LMP with no prior hysterectomy)	68	No	N0 (i-)	Stage IIA		FALSE	f0787165-6f58-4d67-b510-928eea2c4882	710eae35-a21d-4939-8414-d2af4ea02fdd	LIVING	46.5	089E0FB9-6B45-4E3E-843E-EC98D39863F6	Alive	FEMALE		NA	0	6	No	WHITE	Primary Tumor
TCGA-E2-A10A-01	TCGA-E2-A10A			T3	M0	-15085	Allred score 4+3=7	0.211	352	1096	NA	41		2.46	Recurred/Progressed	Negative	NOT HISPANIC OR LATINO	Core needle biopsy		2011-02-11	C50.9	YES	370	C50.4	8500/3	NO	0		Pre (<6 months since LMP AND no prior bilateral ovariectomy AND not on estrogen replacement)	21	No	N0 (i-)	Stage IIB		FALSE	4da7abaf-ac7a-41c0-8033-5780a398545c	0c8615d8-e7a2-465a-8de3-961734941c16	LIVING	40.4	AA1BACC4-0B3D-4E2E-865E-24B570DA4E74	Alive	FEMALE	WITH TUMOR	0	0	3	No	WHITE	Primary Tumor
TCGA-E2-A10B-01	TCGA-E2-A10B			T2	M0	-24577	Allred score 5+3= 8	0.236	748	1065	NA	67		6.41	Recurred/Progressed	Close	NOT HISPANIC OR LATINO	Core needle biopsy		2011-02-22	C50.9	YES	210	C50.9	8500/3	NO	0		Post (prior bilateral ovariectomy OR >12 mo since LMP with no prior hysterectomy)	36	No	N1a	Stage IIB		FALSE	f801aeed-dc43-49d7-a319-84c8851979d9	5f5cddc0-71d3-4bf4-a67c-66550596cf8d	LIVING	37.5	5DAC95DD-5DA6-475B-AC14-5C79FC2F30A6	Alive	FEMALE	TUMOR FREE	0	2	28	No	WHITE	Primary Tumor
TCGA-E2-A10C-01	TCGA-E2-A10C			T2	M0	-19849	Allred score 5+3=8	0.534	854	995	NA	54		40.1	DiseaseFree	Negative	NOT HISPANIC OR LATINO	Core needle biopsy		2011-02-11	C50.9	YES	150	C50.9	8500/3	NO	0		Post (prior bilateral ovariectomy OR >12 mo since LMP with no prior hysterectomy)	286	No	N1a	Stage IIB		FALSE	9ac44381-5d43-4f63-aa3f-7703bfc923c9	afed1e5d-c6c1-4d95-9e57-d82f6a823543	LIVING	40.1	E8A61AAC-BFF5-4341-B051-EDD87515ECDC	Alive	FEMALE	TUMOR FREE	NA	1	13	No	WHITE	Primary Tumor
TCGA-E2-A10E-01	TCGA-E2-A10E			T1c	M0	-23684	Allred score 5+3=8	0.152	418	869	NA	64		28.4	DiseaseFree	Negative	NOT HISPANIC OR LATINO	Core needle biopsy		2011-02-11	C50.9	YES	240	C50.1	8500/3	NO	0		Post (prior bilateral ovariectomy OR >12 mo since LMP with no prior hysterectomy)	20	No	N1a	Stage IIA		FALSE	dc15a8ae-991e-421c-bc70-70e94f79dd17	30ce2884-2ce3-4d6a-b758-17a554d6238c	LIVING	28.4	CFB8EE09-41D3-4A39-A4AE-4CDEC84BB9BC	Alive	FEMALE	TUMOR FREE	NA	2	21	No	WHITE	Primary Tumor
TCGA-E2-A10F-01	TCGA-E2-A10F			T2	M0	-17257	Allred score 5+3=8	0.132	360	801	NA	47		28.8	DiseaseFree	Negative	NOT HISPANIC OR LATINO	Core needle biopsy		2011-02-11	C50.9	YES	110	C50.4	8520/3	NO	0		Pre (<6 months since LMP AND no prior bilateral ovariectomy AND not on estrogen replacement)	21	No	N0 (i-)	Stage IIA		FALSE	8e159b50-8136-42d4-b9c7-d579a74e4931	2666d91b-06ca-4987-84a1-4002befc4d8a	LIVING	28.8	71C82089-E070-4C7B-B15B-0492DECCB3BF	Alive	FEMALE	TUMOR FREE	NA	0	2	No	WHITE	Primary Tumor
TCGA-E2-A14N-01	TCGA-E2-A14N		6th	T2	M0	-13743	Allred score 0+0 = 0	0.0848	1350	1240	NA	37		47.1	DiseaseFree	Negative	NOT HISPANIC OR LATINO	Tumor resection		2011-05-31	C50.9	YES	440	C50.2	8500/3	NO	0	YES	Pre (<6 months since LMP AND no prior bilateral ovariectomy AND not on estrogen replacement)	56	No	N1	Stage IIB		FALSE	752ad011-79e0-494f-9868-98bf6feb28f8	caa51a8b-eadc-4d87-b0f8-f6ffc17723b5	LIVING	47.1	C972EC08-E1AE-4FCB-B8A1-15000306CDE7	Alive	FEMALE	TUMOR FREE	NA	1	38	No	WHITE	Primary Tumor
TCGA-E2-A14O-01	TCGA-E2-A14O		6th	T3	M0	-27837	Allred score 5+3 = 8	0.735	1173	1064	NA	76		44.6	DiseaseFree	Negative	NOT HISPANIC OR LATINO	Tumor resection		2011-03-31	C50.9	YES	210	C50.4	8500/3	NO	0	YES	Post (prior bilateral ovariectomy OR >12 mo since LMP with no prior hysterectomy)	38	No	N1a	Stage IIIA		FALSE	fb356957-f620-4d99-b675-1355a1d9f932	565c78a9-ae5b-49ba-b5fa-4c26250e174a	LIVING	44.6	42E9A561-B052-412E-B0FD-563DC097C3C5	Alive	FEMALE	TUMOR FREE	NA	2	18	No	WHITE	Primary Tumor
TCGA-E2-A14P-01	TCGA-E2-A14P		6th	T2	M0	-28923	Allred score 0+0 = 0	0.274	487	965	NA	79		40.9	DiseaseFree	Negative	NOT HISPANIC OR LATINO	Tumor resection		2011-03-31	C50.9	YES	290	C50.4	8500/3	NO	0	YES	Post (prior bilateral ovariectomy OR >12 mo since LMP with no prior hysterectomy)	60	No	N3	Stage IIIC		FALSE	e4fc0909-f284-4471-866d-d8967b6adcbc	58bfe278-a80f-4722-b286-4d966214d244	LIVING	40.9	FD8CDFD9-6DCF-4CE1-9BB1-A7FF568EE53C	Alive	FEMALE	TUMOR FREE	NA	10	24	No	WHITE	Primary Tumor
TCGA-E2-A14Q-01	TCGA-E2-A14Q		6th	T2	M0	-18507	Allred score 5+3 = 8	0.184	974	960	NA	50		38.2	DiseaseFree	Negative	NOT HISPANIC OR LATINO	Tumor resection		2011-03-31	C50.9	YES	110	C50.4	8500/3	NO	0	YES	Pre (<6 months since LMP AND no prior bilateral ovariectomy AND not on estrogen replacement)	25	No	N1mi	Stage IIA		FALSE	303a1d77-a37a-4966-a4a4-9981d99ba1b4	10f2905c-6bac-4050-9327-926c5c4de29f	LIVING	38.2	42A1A073-69B4-4A66-A998-BE4366E0C89C	Alive	FEMALE	TUMOR FREE	NA	1	7	No	WHITE	Primary Tumor
TCGA-E2-A14R-01	TCGA-E2-A14R		6th	T2	M0	-22686	Allred score 0+0 = 0	0.713	845	910	NA	62		31.9	Recurred/Progressed	Negative	NOT HISPANIC OR LATINO	Tumor resection		2011-04-06	C50.9	YES	190	C50.1	8500/3	NO	0	YES	Post (prior bilateral ovariectomy OR >12 mo since LMP with no prior hysterectomy)	99	No	N0	Stage IIA		FALSE	4fba3deb-db94-44b5-a0f2-a575d270779e	26c43e7a-753c-483b-9ec3-7240efce6c4e	LIVING	38.6	0B6DCA80-3108-4D25-B095-3EC704598B23	Alive	FEMALE	TUMOR FREE	NA	0	8	No	WHITE	Primary Tumor
TCGA-E2-A14S-01	TCGA-E2-A14S		6th	T1c	M0	-23878	Allred score 5+3 = 8	0.25	834	827	NA	65		33.1	DiseaseFree	Negative	NOT HISPANIC OR LATINO	Tumor resection		2011-04-06	C50.9	YES	120	C50.9	8500/3	NO	0	YES	Post (prior bilateral ovariectomy OR >12 mo since LMP with no prior hysterectomy)	26	No	N0	Stage I		FALSE	c2b104ee-f914-4e79-9e1b-56bf88157472	2b795cb0-4f14-4312-b96b-4adfbf9f4124	LIVING	33.1	810B3936-DFF0-420C-BD6C-8D4990B8F536	Alive	FEMALE	TUMOR FREE	NA	0	2	No	WHITE	Primary Tumor
TCGA-E2-A14T-01	TCGA-E2-A14T		6th	T2	M0	-19237	Allred score 5+3 = 8	0.491	890	792	NA	52		33.3	DiseaseFree	Negative	NOT HISPANIC OR LATINO	Tumor resection		2011-04-06	C50.9	YES	210	C50.2	8500/3	NO	0	YES	Post (prior bilateral ovariectomy OR >12 mo since LMP with no prior hysterectomy)	31	No	N0	Stage IIA		FALSE	e0929c47-cff3-4518-a188-8764af01073a	aeea59ad-9570-41c9-9244-348e1c8350fd	LIVING	33.3	6C8B56C1-330B-4116-8B60-7A81A1983277	Alive	FEMALE	TUMOR FREE	NA	0	7	No	WHITE	Primary Tumor
TCGA-E2-A14U-01	TCGA-E2-A14U		6th	T1c	M0	-27389	Allred score 5+3 = 8	1.621e-05	838	796	NA	74		43.3	DiseaseFree	Negative	NOT HISPANIC OR LATINO	Tumor resection		2011-04-06	C50.9	YES	70	C50.4	8520/3	NO	0	YES	Post (prior bilateral ovariectomy OR >12 mo since LMP with no prior hysterectomy)	14	No	N0	Stage I		FALSE	23B7AAEA-1119-4B10-AA1A-0AE255D2F2A6	06239773-A7E3-4262-9B5F-0105E3B1467A	LIVING	43.3	7E0F430B-B96B-49B1-B4C1-88C1F3A855A7	Alive	FEMALE	TUMOR FREE	NA	0	8	No	WHITE	Primary Tumor
TCGA-E2-A14V-01	TCGA-E2-A14V		6th	T2	M0	-19643		0.38	748	722	NA	53		34.2	DiseaseFree	Negative	NOT HISPANIC OR LATINO	Tumor resection		2011-04-06	C50.9	YES	160	C50.3	8500/3	NO	0	YES	Post (prior bilateral ovariectomy OR >12 mo since LMP with no prior hysterectomy)	71	No	N1	Stage IIB		FALSE	3144f1fb-4342-4079-bfe8-940da4bfd88e	78910f0b-59f1-4b4b-a7de-a6cf2402a097	LIVING	34.2	DC8FD7C7-A908-4B90-860F-04984244167C	Alive	FEMALE	TUMOR FREE	NA	3	24	No	WHITE	Primary Tumor
TCGA-E2-A14W-01	TCGA-E2-A14W		6th	T2	M0	-28664		0.313	834	716	NA	78		32	DiseaseFree	Negative	NOT HISPANIC OR LATINO	Tumor resection		2011-04-25	C50.9	YES	150	C50.1	8500/3	NO	0	YES		83	No	N0	Stage IIA		FALSE	eadb0562-2165-4adb-ad58-018e73f82780	b4c869f2-6910-4d41-ae52-b08b378bf681	LIVING	32	9ECD3DA1-25A4-4325-9B3B-6D7C12283C37	Alive	MALE	TUMOR FREE	NA	0	5	No	WHITE	Primary Tumor
TCGA-E2-A14X-01	TCGA-E2-A14X		6th	T2	M0	-20105	Allred score 0+0 = 0	0.332	692	652	NA	55		31.9	DiseaseFree	Negative	NOT HISPANIC OR LATINO	Tumor resection		2011-04-06	C50.9	YES	130	C50.4	8500/3	NO	0	YES	Post (prior bilateral ovariectomy OR >12 mo since LMP with no prior hysterectomy)	22	No	N2	Stage IIIA		FALSE	60df7543-6da5-4c75-943b-5800c1e08234	a7cc9298-d6f1-48ef-a93a-9c75fc0cb800	LIVING	31.9	734305A3-5EC4-4DE4-B263-91A49082F146	Alive	FEMALE	TUMOR FREE	NA	5	21	No	BLACK OR AFRICAN AMERICAN	Primary Tumor
TCGA-E2-A14Y-01	TCGA-E2-A14Y		6th	T2	M0	-13004		0.226	688	597	NA	35		28.6	DiseaseFree	Negative	NOT HISPANIC OR LATINO	Tumor resection		2011-04-06	C50.9	YES	190	C50.4	8500/3	NO	0	YES	Pre (<6 months since LMP AND no prior bilateral ovariectomy AND not on estrogen replacement)	27	No	N0	Stage IIA		FALSE	a0576d44-9add-429b-9eeb-f7b234b7385f	1fa2d526-b5d5-47e0-87d1-6ac17add8a0b	LIVING	28.6	957AC7B0-D613-4F97-BBBC-930EB95EE2E4	Alive	FEMALE	TUMOR FREE	NA	0	5	No	WHITE	Primary Tumor
TCGA-E2-A14Z-01	TCGA-E2-A14Z		6th	T1c	M0	-23682	Allred score 5+3 = 8	0.478	518	519	NA	64		6.18	Recurred/Progressed	Negative	NOT HISPANIC OR LATINO	Tumor resection		2011-04-06	C50.9	YES	120	C50.4	8500/3	NO	0	YES	Post (prior bilateral ovariectomy OR >12 mo since LMP with no prior hysterectomy)	48	No	N0	Stage I		FALSE	d7ce6b79-f7c0-481e-9dbd-6273f01c9786	b9ae712b-823b-4ff8-bd1b-2eab4a2b5790	DECEASED	18.5	750D4149-BD70-4D7C-B915-9694BD1EC760	Dead	FEMALE	WITH TUMOR	NA	0	1	No	WHITE	Primary Tumor
TCGA-E2-A150-01	TCGA-E2-A150		6th	T2	M0	-17580	Allred score 0+0 = 0	0.671	591	506	NA	48		25.4	DiseaseFree	Negative	NOT HISPANIC OR LATINO	Tumor resection		2011-04-06	C50.9	YES	180	C50.9	8500/3	NO	0	YES	Post (prior bilateral ovariectomy OR >12 mo since LMP with no prior hysterectomy)	38	No	N0	Stage IIA		FALSE	4ac693e9-10f3-46b3-9d46-df3af7b0d259	209bcf2c-dac4-48e4-b47c-5a4c8e8797b9	LIVING	25.4	5173DB84-EE23-4973-A244-4BB1D79325C9	Alive	FEMALE	TUMOR FREE	NA	0	2	No	WHITE	Primary Tumor
TCGA-E2-A152-01	TCGA-E2-A152		6th	T1c	M0	-20705		0.642	588	484	NA	56		2.73	Recurred/Progressed	Negative	NOT HISPANIC OR LATINO	Tumor resection		2011-04-06	C50.9	YES	140	C50.9	8500/3	NO	0	YES	Post (prior bilateral ovariectomy OR >12 mo since LMP with no prior hysterectomy)	100	No	N0	Stage I		FALSE	a8015490-9740-45c9-8bd2-eb6d1beefc2e	0ef32921-bb7a-4055-a6ed-e8ced5f824e4	LIVING	27.1	46EE72F9-2F59-413F-8278-7A073760F095	Alive	FEMALE	WITH TUMOR	NA	0	3	No	WHITE	Primary Tumor
TCGA-E2-A153-01	TCGA-E2-A153		6th	T1c	M0	-18875		0.194	586	475	NA	51		23.2	DiseaseFree	Negative	NOT HISPANIC OR LATINO	Tumor resection		2011-04-07	C50.9	YES	270	C50.1	8500/3	NO	0	YES	Pre (<6 months since LMP AND no prior bilateral ovariectomy AND not on estrogen replacement)	19	No	N1a	Stage IIB		FALSE	be9bf36a-12e1-4386-addf-1686dc8b49de	6526e884-ca7a-4f10-9cb8-fe8fa90f1dbb	LIVING	23.2	06D417E8-68C2-408C-8ABC-B3042566C976	Alive	FEMALE	TUMOR FREE	NA	3	15	No	WHITE	Primary Tumor
TCGA-E2-A154-01	TCGA-E2-A154		6th	T1c	M0	-24999		0.383	325	461	NA	68		19.4	DiseaseFree	Negative	NOT HISPANIC OR LATINO	Tumor resection		2011-04-07	C50.9	YES	400	C50.9	8500/3	NO	0	YES	Post (prior bilateral ovariectomy OR >12 mo since LMP with no prior hysterectomy)	36	No	N0	Stage I		FALSE	24e39609-9645-43e5-960b-db5446eaea65	093150bc-9ea8-4729-8693-32fe1d9690d2	LIVING	19.4	8F8DCA87-B27A-429C-952A-186F8D4502AE	Alive	FEMALE	TUMOR FREE	NA	0	2	No	WHITE	Primary Tumor
TCGA-E2-A155-01	TCGA-E2-A155		6th	T2	M0	-21348		0.221	553	457	NA	58		21	DiseaseFree	Negative	NOT HISPANIC OR LATINO	Tumor resection		2011-04-07	C50.9	YES	280	C50.2	8500/3	NO	0	YES	Post (prior bilateral ovariectomy OR >12 mo since LMP with no prior hysterectomy)	50	No	N1a	Stage IIB		FALSE	01f50abf-fc15-446e-9d07-edeecc545a32	6ae685e1-cd02-4c07-839d-0f2507077955	LIVING	21	C3E398CE-1918-4107-948C-6579B1DA1F77	Alive	FEMALE	TUMOR FREE	NA	2	15	No	WHITE	Primary Tumor
TCGA-E2-A156-01	TCGA-E2-A156		6th	T1c	M0	-22422		0.0482	481	447	NA	61		23.9	DiseaseFree	Negative	NOT HISPANIC OR LATINO	Tumor resection		2011-04-07	C50.9	YES	190	C50.9	8500/3	NO	0	YES	Post (prior bilateral ovariectomy OR >12 mo since LMP with no prior hysterectomy)	22	No	N0	Stage I		FALSE	f05d314c-5ec5-4e2a-b785-9a702716f111	9d39f2cf-84b5-45ba-8c40-0a42d8f303b7	LIVING	23.9	EF28484E-82C7-4988-A6E0-DDDA555652EA	Alive	FEMALE	TUMOR FREE	NA	0	3	No	WHITE	Primary Tumor
TCGA-E2-A158-01	TCGA-E2-A158		6th	T1c	M0	-15903	Allred score 0+0 = 0	0.476	450	436	NA	43		14.8	DiseaseFree	Negative	NOT HISPANIC OR LATINO	Tumor resection		2011-04-07	C50.9	YES	200	C50.4	8500/3	NO	0	YES	Pre (<6 months since LMP AND no prior bilateral ovariectomy AND not on estrogen replacement)	73	No	N1mi	Stage IIA		FALSE	a6edb6ca-ae9f-4da7-8ebe-92d83d2987fb	5ce91cce-a4ac-45e1-bc3e-737494a67769	LIVING	14.8	1CEBF20D-767A-4A19-AA41-B9EAFCF05176	Alive	FEMALE	TUMOR FREE	NA	1	2	No	WHITE	Primary Tumor
TCGA-E2-A159-01	TCGA-E2-A159		6th	T2	M0	-18621	Allred score 0+0 = 0	0.347	515	434	NA	50		25	DiseaseFree	Negative	NOT HISPANIC OR LATINO	Tumor resection		2011-04-07	C50.9	YES	240	C50.5	8500/3	NO	0	YES	Pre (<6 months since LMP AND no prior bilateral ovariectomy AND not on estrogen replacement)	129	No	N0	Stage IIA		FALSE	d7308344-5bab-4073-bb4f-4d8cd8d7bd17	601e0a1b-309d-41c2-a7ba-a2282db846fa	LIVING	25	7CA117DA-5D1C-4F8B-8330-5C58FE05DE36	Alive	FEMALE	TUMOR FREE	NA	0	4	No	WHITE	Primary Tumor
TCGA-E2-A15A-01	TCGA-E2-A15A		6th	T2	M0	-16750		0.477	502	426	NA	45		23.3	DiseaseFree	Negative	NOT HISPANIC OR LATINO	Tumor resection		2011-04-07	C50.9	YES	330	C50.9	8500/3	NO	0	YES	Pre (<6 months since LMP AND no prior bilateral ovariectomy AND not on estrogen replacement)	40	No	N3a	Stage IIIC		FALSE	73ccc949-01b7-48d3-a7c4-c4bcd261672a	423305a8-f060-44da-a053-18dd8c2b172e	LIVING	23.3	744919EA-D97A-41A1-B1F3-70A2F972D9A7	Alive	FEMALE	TUMOR FREE	NA	13	19	No	WHITE	Primary Tumor
TCGA-E2-A15C-01	TCGA-E2-A15C		6th	T1c	M0	-22583		0.135	497	393	NA	61		22.8	DiseaseFree	Negative	NOT HISPANIC OR LATINO	Tumor resection		2011-04-13	C50.9	YES	200	C50.9	8500/3	NO	0	YES	Post (prior bilateral ovariectomy OR >12 mo since LMP with no prior hysterectomy)	27	No	N0	Stage I		FALSE	da840a22-8d30-4682-bbd0-8fa87bd40528	31f45863-c419-4a07-896c-722b9724ce76	LIVING	22.8	04FF2CF1-737B-4FD2-8A1D-F9B5488DE510	Alive	FEMALE	TUMOR FREE	NA	0	4	No	WHITE	Primary Tumor
TCGA-E2-A15D-01	TCGA-E2-A15D		6th	T2	M0	-17224		0.223	316	393	NA	47		17.3	DiseaseFree	Negative	NOT HISPANIC OR LATINO	Tumor resection		2011-04-13	C50.9	YES	330	C50.9	8500/3	NO	0	YES	Pre (<6 months since LMP AND no prior bilateral ovariectomy AND not on estrogen replacement)	29	No	N0	Stage IIA		FALSE	c85f080a-1075-41df-959f-1b514a11b3c4	6c141702-104f-4ce1-ba82-1add65f07d7f	LIVING	17.3	1FE4EB4C-FEF8-486A-B39D-6F9F023FDAC4	Alive	FEMALE	TUMOR FREE	NA	0	4	No	WHITE	Primary Tumor
TCGA-E2-A15E-01	TCGA-E2-A15E		6th	T1c	M0	-14894	Allred score 5+3 = 8	0.3	518	387	NA	40		20.7	DiseaseFree	Negative	NOT HISPANIC OR LATINO	Tumor resection		2011-04-25	C50.9	YES	520	C50.3	8500/3	NO	0	YES	Pre (<6 months since LMP AND no prior bilateral ovariectomy AND not on estrogen replacement)	27	No	N1a	Stage IIA		FALSE	0a2a3529-f645-4967-9a58-89ee20b8bb62	9992eeb9-901b-4a32-badc-e9be7c9ba4ba	LIVING	20.7	514D4C2E-8215-4770-9FC1-25F988232A85	Alive	FEMALE	TUMOR FREE	NA	1	9	No	WHITE	Primary Tumor
TCGA-E2-A15F-01	TCGA-E2-A15F		6th	T1c	M0	-23660		0.242	469	360	NA	64		21.6	DiseaseFree	Negative	NOT HISPANIC OR LATINO	Tumor resection		2011-04-13	C50.9	YES	190	C50.4	8500/3	NO	0	YES	Post (prior bilateral ovariectomy OR >12 mo since LMP with no prior hysterectomy)	19	No	N0	Stage I		FALSE	ec77a23d-84f5-47e4-bf2a-fa1c03baf3db	996911f9-c9fe-48d8-aa35-5672610e72fb	LIVING	21.6	19360B66-C514-4EE1-ACD7-08873828133E	Alive	FEMALE	TUMOR FREE	NA	0	3	No	WHITE	Primary Tumor
TCGA-E2-A15G-01	TCGA-E2-A15G		6th	T2	M0	-28013		0.0763	316	358	NA	76		18.2	DiseaseFree	Negative	NOT HISPANIC OR LATINO	Tumor resection		2011-04-13	C50.9	YES	110	C50.4	8522/3	NO	0	YES	Post (prior bilateral ovariectomy OR >12 mo since LMP with no prior hysterectomy)	44	No	N0	Stage IIA		FALSE	271e8024-a008-4bf0-9f6e-177f60096b1b	d6dcbd76-1146-4535-afd6-9a9c0e3c56a9	LIVING	18.2	DD9FDF3B-29CA-4D11-8615-E2EEB5D601D1	Alive	FEMALE	TUMOR FREE	NA	0	1	No	WHITE	Primary Tumor
TCGA-E2-A15H-01	TCGA-E2-A15H		6th	T1c	M0	-13985		0.189	42	357	NA	38		12.9	DiseaseFree	Negative	NOT HISPANIC OR LATINO	Tumor resection		2011-04-13	C50.9	YES	90	C50.9	8500/3	NO	0	YES	Pre (<6 months since LMP AND no prior bilateral ovariectomy AND not on estrogen replacement)	26	No	N1mi	Stage IIA		FALSE	5580b21a-2cdb-4777-ad79-6e06654144f5	7cb99442-005b-4611-94f9-03af195ec7e3	LIVING	12.9	E4D1A7DC-62B1-44D8-A747-5A19842C6F69	Alive	FEMALE	TUMOR FREE	NA	1	4	No	WHITE	Primary Tumor
TCGA-E2-A15I-01	TCGA-E2-A15I		6th	T2	M0	-16163		0.15	411	344	NA	44		17.4	DiseaseFree	Negative	NOT HISPANIC OR LATINO	Tumor resection		2011-04-13	C50.9	YES	100	C50.4	8500/3	NO	0	YES	Pre (<6 months since LMP AND no prior bilateral ovariectomy AND not on estrogen replacement)	119	No	N0	Stage IIA		FALSE	64089c20-939f-48b4-ae8b-904ad0597145	c2f00c0c-9ad9-4c1d-912c-52eacedcba12	LIVING	17.4	FE41053B-16F4-46B0-B243-571F4D5A1665	Alive	FEMALE	TUMOR FREE	NA	0	4	No	WHITE	Primary Tumor
TCGA-E2-A15J-01	TCGA-E2-A15J		6th	T1c	M0	-18771		0.109	464	344	NA	51		19.4	DiseaseFree	Negative	NOT HISPANIC OR LATINO	Tumor resection		2011-04-13	C50.9	YES	210	C50.4	8500/3	NO	0	YES	Pre (<6 months since LMP AND no prior bilateral ovariectomy AND not on estrogen replacement)	21	No	N0	Stage I		FALSE	1fef9454-b3e8-4d9d-a9aa-aa1f1a32b80c	6f68a61c-8aec-42d3-b225-22bc6da3e355	LIVING	19.4	352BF6A2-974B-440E-BB0B-DCD79874DAC3	Alive	FEMALE	TUMOR FREE	NA	0	12	No	WHITE	Primary Tumor
TCGA-E2-A15K-01	TCGA-E2-A15K		7th	T2	M0	-21514	Allred score 5+3 = 8	0.195	34	309	NA	58		9.03	DiseaseFree	Negative	NOT HISPANIC OR LATINO	Tumor resection		2011-04-13	C50.9	YES	170	C50.9	8500/3	NO	0	YES	Post (prior bilateral ovariectomy OR >12 mo since LMP with no prior hysterectomy)	38	No	N1a	Stage IIA		FALSE	17c1d42c-cb84-4655-a4cd-b54bae17ecaf	3a36b403-ea38-49f9-9c28-710c5d141164	LIVING	9.03	2BAC50DA-016F-4B5C-B8D1-DE75377EF0C7	Alive	FEMALE	TUMOR FREE	NA	2	17	No	WHITE	Primary Tumor
TCGA-E2-A15L-01	TCGA-E2-A15L		7th	T2	M0	-23845	Allred score 5+3 = 8	0.114	331	289	NA	65		20.6	DiseaseFree	Negative	NOT HISPANIC OR LATINO	Tumor resection		2011-04-13	C50.9	YES	240	C50.9	8520/3	NO	0	YES	Post (prior bilateral ovariectomy OR >12 mo since LMP with no prior hysterectomy)	31	No	N0	Stage IIA		FALSE	37242f5a-25ae-4b1f-9ce6-09ce1dc92539	66cd1bec-0b4d-4212-ab3f-548ffcfa7dd8	LIVING	20.6	C04B3267-9833-44D6-8C3D-45D7F829C38C	Alive	FEMALE	TUMOR FREE	NA	0	3	No	BLACK OR AFRICAN AMERICAN	Primary Tumor
TCGA-E2-A15M-01	TCGA-E2-A15M		7th	T2	M0	-24266		0.277	235	287	NA	66		NA		Negative	NOT HISPANIC OR LATINO	Tumor resection		2011-04-14	C50.9	YES	270	C50.5	8520/3	NO	0	YES	Post (prior bilateral ovariectomy OR >12 mo since LMP with no prior hysterectomy)	59	No	N0	Stage IIA		FALSE	59be60a3-e0f6-4d63-b98c-574ef92428c4	0177791d-d02d-4433-81ae-458a93fdd60f	DECEASED	11	51601F8B-BA50-42C4-B0C9-B3581F80CD2C	Dead	FEMALE	TUMOR FREE	NA	0	5	No	WHITE	Primary Tumor
TCGA-E2-A15O-01	TCGA-E2-A15O		7th	T1c	M0	-32583	Allred score 5+2 = 7	0.294	396	273	NA	89		13	DiseaseFree	Negative	NOT HISPANIC OR LATINO	Tumor resection		2011-04-14	C50.9	YES	110	C50.9	8500/3	NO	0	NO	Post (prior bilateral ovariectomy OR >12 mo since LMP with no prior hysterectomy)	32	No	NX	Stage I		FALSE	eafa45a4-2fd1-4fa3-860c-9d52ed382b7d	cd17957d-1e5c-4874-8070-890c1d692a0b	LIVING	13	AA4B6E2D-7503-4E51-BEA4-632CC994770A	Alive	FEMALE	TUMOR FREE	NA	NA	NA	Yes	BLACK OR AFRICAN AMERICAN	Primary Tumor
TCGA-E2-A15P-01	TCGA-E2-A15P		7th	T1c	M0	-22524	Allred score 5+3 = 8	0.194	315	269	NA	61		19.6	DiseaseFree	Negative	NOT HISPANIC OR LATINO	Tumor resection		2011-04-14	C50.9	YES	110	C50.9	8500/3	NO	0	YES	Post (prior bilateral ovariectomy OR >12 mo since LMP with no prior hysterectomy)	42	No	N0	Stage IA		FALSE	a1674d7b-787a-45c4-bf16-1b7d0efce207	62ce9f85-13d7-445b-a32a-11f6001617e4	LIVING	19.6	8C7442C0-540C-4023-BBFA-8482935259A7	Alive	FEMALE	TUMOR FREE	NA	0	2	No	WHITE	Primary Tumor
TCGA-E2-A15R-01	TCGA-E2-A15R		7th	T1c	M0	-23570	Allred score 5+3 = 8	0.357	330	247	NA	64		17.1	DiseaseFree	Negative	NOT HISPANIC OR LATINO	Tumor resection		2011-04-14	C50.9	YES	140	C50.9	8500/3	NO	0	YES	Post (prior bilateral ovariectomy OR >12 mo since LMP with no prior hysterectomy)	34	No	N1a	Stage IIA		FALSE	33b7bf50-53f4-4839-aa83-9665f85671d8	7295d5c2-d7bc-4d35-bdcb-17c4ec5e5de0	LIVING	17.1	0F708C6E-0262-46EE-8ED2-67E791D5C379	Alive	FEMALE	TUMOR FREE	NA	3	4	No	WHITE	Primary Tumor
TCGA-E2-A15S-01	TCGA-E2-A15S		7th	T2	M0	-12671		0.463	274	247	NA	34		14.1	DiseaseFree	Negative	NOT HISPANIC OR LATINO	Tumor resection		2011-04-14	C50.9	YES	560	C50.4	8500/3	NO	0	YES	Post (prior bilateral ovariectomy OR >12 mo since LMP with no prior hysterectomy)	41	No	N1	Stage IIB		FALSE	0f7ab21b-1fd0-45e0-9a47-17c4691eb84f	0ac12a02-8fe3-4c1b-a885-848aa924a339	LIVING	14.1	AF740239-D3E2-4C74-844E-0F5AD1A905ED	Alive	FEMALE	TUMOR FREE	NA	1	17	No	WHITE	Primary Tumor
TCGA-E2-A15T-01	TCGA-E2-A15T		7th	T2	M0	-24054	Allred score 5+3 = 8	0.164	267	162	NA	65		15	DiseaseFree	Negative	NOT HISPANIC OR LATINO	Tumor resection		2011-04-14	C50.9	YES	360	C50.4	8500/3	NO	0	YES	Post (prior bilateral ovariectomy OR >12 mo since LMP with no prior hysterectomy)	39	No	N0	Stage IIA		FALSE	e68ebfd4-3688-4caa-9e38-7764f9258c30	2dc5d195-dede-4511-9415-c7bd3070bbd3	LIVING	15	8FEBDA40-59FF-4E76-A9B1-F46BAB7C3E4A	Alive	FEMALE	TUMOR FREE	NA	0	2	No	WHITE	Primary Tumor
TCGA-E2-A1AZ-01	TCGA-E2-A1AZ		6th	T2	M0	-23230		0.266	1965	2527	NA	63		76.5	DiseaseFree	Negative	HISPANIC OR LATINO	Tumor resection		2011-04-25	C50.9	YES	250	C50.9	8500/3	NO	0	YES	Post (prior bilateral ovariectomy OR >12 mo since LMP with no prior hysterectomy)	46	No	N1a	Stage IIB		TRUE	89128dba-403f-4a96-bb3b-23ed0d5e2147	758fc615-957e-4bd0-a0c6-bcd23eb7d167	LIVING	76.5	4E233F7D-035A-44A0-A5B6-6248357EB7B2	Alive	FEMALE	TUMOR FREE	NA	1	3	No	WHITE	Primary Tumor
TCGA-E2-A1B0-01	TCGA-E2-A1B0		6th	T2	M0	-18346	Allred score 0+0 = 0	0.236	1271	1315	NA	50		53.6	DiseaseFree	Negative	NOT HISPANIC OR LATINO	Tumor resection		2011-04-25	C50.9	YES	110	C50.5	8500/3	NO	0	YES	Post (prior bilateral ovariectomy OR >12 mo since LMP with no prior hysterectomy)	31	No	N2	Stage IIIA		TRUE	996bd3f0-d767-4eff-9c82-99fcb5a3006a	06479cfc-c43c-43f5-9d2f-44b3adc45d84	LIVING	53.6	9C3987A7-D474-4717-8DCE-4AF1AE03ED84	Alive	FEMALE	TUMOR FREE	NA	6	28	No	WHITE	Primary Tumor
TCGA-E2-A1B1-01	TCGA-E2-A1B1		6th	T2	M0	-16603	Allred score 3+2 = 5	0.0269	1361	1268	NA	45		53	DiseaseFree	Negative	NOT HISPANIC OR LATINO	Tumor resection		2011-04-25	C50.9	YES	300	C50.4	8500/3	NO	0	YES	Post (prior bilateral ovariectomy OR >12 mo since LMP with no prior hysterectomy)	16	No	N1	Stage IIB		TRUE	8a0ef221-8070-43fc-9d98-def90abe4871	1cb37b69-c0a9-4b5c-baf5-4107d0e029ad	LIVING	53	431AE1CB-9605-45E3-B6C3-5253B24655D6	Alive	FEMALE	TUMOR FREE	NA	1	6	No	WHITE	Primary Tumor
TCGA-E2-A1B4-01	TCGA-E2-A1B4		6th	T1c	M0	-27241	Allred score 5+3 = 8	0.0302	911	798	NA	74		NA		Negative	NOT HISPANIC OR LATINO	Tumor resection		2011-04-25	C50.9	YES	110	C50.2	8500/3	NO	0	YES	Post (prior bilateral ovariectomy OR >12 mo since LMP with no prior hysterectomy)	30	No	N2a	Stage IIIA		TRUE	dbb2da92-99dd-400c-bc05-e87d7273656c	0edb299d-861a-4141-9d5c-132d8c970547	DECEASED	33	2F35A09A-7EB3-484C-9738-664C8914C116	Dead	FEMALE	TUMOR FREE	NA	3	4	No	WHITE	Primary Tumor
TCGA-E2-A1B5-01	TCGA-E2-A1B5		6th	T2	M0	-17039	Allred score 5+3 = 8	0.0291	774	783	NA	46		32.3	DiseaseFree	Negative	NOT HISPANIC OR LATINO	Tumor resection		2011-04-25	C50.9	YES	260	C50.9	8520/3	NO	0	YES	Pre (<6 months since LMP AND no prior bilateral ovariectomy AND not on estrogen replacement)	21	No	N0	Stage IIA		TRUE	7241b3d4-31ee-4fd2-a4a5-35a9d5f37d6a	5b01ed81-2119-4797-9be9-67bc21abc7d9	LIVING	32.3	EDD254CA-0EC6-42F8-B213-C2D386AB11F4	Alive	FEMALE	TUMOR FREE	NA	0	5	No	WHITE	Primary Tumor
TCGA-E2-A1BC-01	TCGA-E2-A1BC		7th	T1c	M0	-23168		0.138	297	275	NA	63		16.5	DiseaseFree	Positive		Tumor resection		2011-04-25	C50.9	YES	100	C50.4	8524/3	NO	0	YES	Post (prior bilateral ovariectomy OR >12 mo since LMP with no prior hysterectomy)	28	No	N0	Stage IA		TRUE	d8492ebd-3d94-4a4b-8de7-386526691cc2	83ec5738-3a27-4100-83f2-8b30ae3b2fb7	LIVING	16.5	817D4725-01FE-4148-A8FC-3431F28D5CD8	Alive	FEMALE	TUMOR FREE	NA	0	4	Yes		Primary Tumor
TCGA-E2-A1BD-01	TCGA-E2-A1BD		7th	T2	M0	-19627	Allred score 5+3 = 8	0.463	317	260	NA	53		17.1	DiseaseFree	Negative	NOT HISPANIC OR LATINO	Tumor resection		2011-04-25	C50.9	YES	100	C50.9	8500/3	NO	0	YES	Post (prior bilateral ovariectomy OR >12 mo since LMP with no prior hysterectomy)	32	No	N0	Stage IIA		TRUE	0e1d0d46-7a7b-4538-95dd-b9fc20a15aec	1ddc4c86-029f-49b5-893c-a218240d3fa4	LIVING	17.1	DF746E32-AD2F-49CB-9AA6-4F8494C16B20	Alive	FEMALE	TUMOR FREE	NA	0	1	No	WHITE	Primary Tumor
TCGA-E2-A1IE-01	TCGA-E2-A1IE		6th	T2	M0	-22510	allred score 5 + 3 = 8	0.263	983	938	NA	61		38.3	DiseaseFree	Negative	NOT HISPANIC OR LATINO	Tumor resection		2011-04-26	C50.9	YES	80	C50.9	8500/3	NO	0	YES	Post (prior bilateral ovariectomy OR >12 mo since LMP with no prior hysterectomy)	26	No	N1	Stage IIB		FALSE	2d0d7ff4-7866-4ae1-9cf1-a3c7f4cbe48d	6bbd477d-699c-4988-a27b-0c3233b595eb	LIVING	38.3	95443906-A63B-4E07-8C4A-ED0A918B88F8	Alive	FEMALE	TUMOR FREE	NA	1	3	No	WHITE	Primary Tumor
TCGA-E2-A1IF-01	TCGA-E2-A1IF		6th	T1c	M0	-27341	allred score 5+3=8	0.118	956	932	NA	74		37.4	DiseaseFree	Negative	NOT HISPANIC OR LATINO	Tumor resection		2011-04-28	C50.9	YES	70	C50.4	8500/3	NO	0	YES	Post (prior bilateral ovariectomy OR >12 mo since LMP with no prior hysterectomy)	20	No	N0	Stage I		FALSE	718db047-9f32-48c4-98c9-515218441bca	5b62628a-b301-4d60-9213-396e3fc5a3ed	LIVING	37.4	9E2EF2C8-A60D-443D-99B6-205B7053175A	Alive	FEMALE	TUMOR FREE	NA	0	4	No	WHITE	Primary Tumor
TCGA-E2-A1IG-01	TCGA-E2-A1IG		6th	T2	M0	-16757		0.126	755	679	NA	45		32.8	DiseaseFree	Negative	NOT HISPANIC OR LATINO	Tumor resection		2011-04-28	C50.9	YES	180	C50.4	8500/3	NO	0	YES	Pre (<6 months since LMP AND no prior bilateral ovariectomy AND not on estrogen replacement)	36	No	N1mi	Stage IIB		FALSE	bc0bc70f-c6cf-4dbc-9dc3-8b7bc5f381a4	5e429dd7-787c-4e7d-b672-b000b7b57929	LIVING	32.8	ECD02213-B048-4776-B09B-982FE1260F80	Alive	FEMALE	TUMOR FREE	NA	1	3	No	WHITE	Primary Tumor
TCGA-E2-A1IH-01	TCGA-E2-A1IH		6th	T1c	M0	-29444	allred score 5+3=8	0.381	658	883	NA	80		33.7	DiseaseFree	Negative	NOT HISPANIC OR LATINO	Tumor resection		2011-04-28	C50.9	YES	80	C50.2	8520/3	NO	0	YES	Post (prior bilateral ovariectomy OR >12 mo since LMP with no prior hysterectomy)	54	No	N0	Stage I		FALSE	ec0155ab-1b14-498d-8fa9-9f63e3ccb990	118fd65d-0b94-4663-a2a3-1f53b278711b	LIVING	33.7	12DAEBF2-CDBF-4D90-9C74-2A2AEF1E8433	Alive	FEMALE	TUMOR FREE	NA	0	2	No	WHITE	Primary Tumor
TCGA-E2-A1II-01	TCGA-E2-A1II		6th	T1c	M0	-18788	allred score 0 + 0 = 0	0.514	850	854	NA	51		33.7	DiseaseFree	Negative	NOT HISPANIC OR LATINO	Tumor resection		2011-04-28	C50.9	YES	70	C50.9	8500/3	NO	0	YES	Post (prior bilateral ovariectomy OR >12 mo since LMP with no prior hysterectomy)	23	No	N0	Stage I		FALSE	0fe1419e-a005-407c-8ae7-15c4c1579539	e70a8d1b-f29d-412f-8c90-85862a2b75ad	LIVING	33.7	4F2A288E-8162-4579-BCD2-0FF31B0EEB3C	Alive	FEMALE	TUMOR FREE	NA	0	5	No	WHITE	Primary Tumor
TCGA-E2-A1IJ-01	TCGA-E2-A1IJ		6th	T1c	M0	-20956		0.116	725	707	NA	57		28.4	DiseaseFree	Negative	NOT HISPANIC OR LATINO	Tumor resection		2011-04-29	C50.9	YES	70	C50.9	8520/3	NO	0	YES	Post (prior bilateral ovariectomy OR >12 mo since LMP with no prior hysterectomy)	16	No	N0	Stage I		FALSE	b09643c2-ded5-4346-b3c5-90a48f88a02e	0c61c676-2a72-4dbe-8dcb-284bd112570c	LIVING	28.4	35F7D0D1-BA21-4135-B444-6B10EAF66F25	Alive	FEMALE	TUMOR FREE	NA	0	3	No	WHITE	Primary Tumor
TCGA-E2-A1IK-01	TCGA-E2-A1IK		6th	T1c	M0	-26052		4.85e-07	519	423	NA	71		22.6	DiseaseFree	Negative	NOT HISPANIC OR LATINO	Tumor resection		2011-05-17	C50.9	YES	70	C50.9	8500/3	NO	0	YES	Post (prior bilateral ovariectomy OR >12 mo since LMP with no prior hysterectomy)	15	No	N1mi	Stage IIA		FALSE	becedbfd-b2aa-4dde-b7f4-29e6f59ec32c	e2da00f3-fdb9-4ab4-964a-6828568e2e6e	LIVING	22.6	FE54D4DC-C35E-44D2-B8B5-0B631AE0F89D	Alive	FEMALE	TUMOR FREE	NA	1	6	No	WHITE	Primary Tumor
TCGA-E2-A1IL-01	TCGA-E2-A1IL		6th	T1c	M0	-28495	allred score 5+3=8	0.169	14	417	NA	78		3.88	DiseaseFree	Negative	NOT HISPANIC OR LATINO	Tumor resection		2011-04-29	C50.9	YES	120	C50.4	8520/3	NO	0	YES	Post (prior bilateral ovariectomy OR >12 mo since LMP with no prior hysterectomy)	18	No	N1a	Stage IIA		FALSE	b63391a0-73f8-4544-9e94-f6529245ca2a	a63690bb-5761-47d7-854e-7be44d9b0b3a	LIVING	3.88	E0CCE6AD-38A6-446C-ACF7-358C1DFC59F8	Alive	FEMALE		NA	1	4	No	WHITE	Primary Tumor
TCGA-E2-A1IN-01	TCGA-E2-A1IN		7th	T1c	M0	-22199	allred score 5+3=8	0.449	392	368	NA	60		22.2	DiseaseFree	Negative	NOT HISPANIC OR LATINO	Tumor resection		2011-04-29	C50.9	YES	20	C50.9	8500/3	NO	0	YES	Post (prior bilateral ovariectomy OR >12 mo since LMP with no prior hysterectomy)	156	No	N0	Stage I		FALSE	f43d622f-eed5-4933-adc6-ae9ad1e33028	24153fe0-2c47-456a-b344-874a0e28de4d	LIVING	22.2	CC0B1145-B242-45BD-A946-B14BA5A9E923	Alive	FEMALE	TUMOR FREE	NA	0	2	No	WHITE	Primary Tumor
TCGA-E2-A1IO-01	TCGA-E2-A1IO		7th	T1c	M0	-13720		0.411	449	367	NA	37		21	DiseaseFree	Negative	NOT HISPANIC OR LATINO	Tumor resection		2011-04-29	C50.9	YES	70	C50.9	8500/3	NO	0	YES	Pre (<6 months since LMP AND no prior bilateral ovariectomy AND not on estrogen replacement)	14	No	N0	Stage I		FALSE	71fc8941-4cfb-47ea-a533-873d38f8c95c	de6d4267-c1cb-4761-a539-5f83368735af	LIVING	21	A9D36308-DAEF-48B9-A4EC-6B9B24EE3DC2	Alive	FEMALE	TUMOR FREE	NA	0	1	No	WHITE	Primary Tumor
TCGA-E2-A1IU-01	TCGA-E2-A1IU		7th	T1c	M0	-22279		0.0515	127	136	NA	60		11.1	DiseaseFree	Negative	NOT HISPANIC OR LATINO	Tumor resection		2011-04-29	C50.9	YES	270	C50.4	8500/3	NO	0	YES	Post (prior bilateral ovariectomy OR >12 mo since LMP with no prior hysterectomy)	18	No	N0 (mol+)	Stage IA		FALSE	001cef41-ff86-4d3f-a140-a647ac4b10a1	92058c44-a484-4e08-b1fe-dfe2f03a0aa1	LIVING	11.1	ACE20EC5-2822-4F50-949E-E194C59F0FCD	Alive	FEMALE	TUMOR FREE	NA	0	11	No	WHITE	Primary Tumor
TCGA-E2-A1L6-01	TCGA-E2-A1L6		6th	T1c	M0	-16403	allred score 5 + 3 = 8	0.129	1312	1325	NA	44		54.1	DiseaseFree	Negative	NOT HISPANIC OR LATINO	Tumor resection		2011-06-07	C50.9	YES	110	C50.5	8500/3	NO	0	YES	Pre (<6 months since LMP AND no prior bilateral ovariectomy AND not on estrogen replacement)	18	No	N1mi	Stage IIA		FALSE	2e32f31f-9817-4935-b259-96c59936ee33	5854b639-f677-4ee3-9d68-61b1cdd5a647	LIVING	54.1	F23523C7-B6E9-4205-BD36-D76E9EE9C453	Alive	FEMALE	TUMOR FREE	NA	1	6	No	WHITE	Primary Tumor
TCGA-E2-A1L7-01	TCGA-E2-A1L7		6th	T2	M0	-14854	Allred score 1+1 = 2	0.459	633	548	NA	40		27.4	DiseaseFree	Negative	NOT HISPANIC OR LATINO	Tumor resection		2011-06-01	C50.9	YES	150	C50.4	8500/3	NO	0	YES	Pre (<6 months since LMP AND no prior bilateral ovariectomy AND not on estrogen replacement)	64	No	N2	Stage IIIA		FALSE	791c5768-f0f5-4ab6-86eb-998e5c4b49e3	09b414c4-a314-43c5-823a-d91442b6b02b	LIVING	27.4	E78526AB-D72D-4407-B7E1-2255BB5B2F68	Alive	FEMALE	TUMOR FREE	NA	7	20	No	WHITE	Primary Tumor
TCGA-E2-A1L8-01	TCGA-E2-A1L8		6th	T2	M0	-19187	allred score 5 + 3 = 8	0.164	1015	912	NA	52		39.6	DiseaseFree	Negative	NOT HISPANIC OR LATINO	Tumor resection		2011-06-07	C50.9	YES	180	C50.4	8520/3	NO	0	YES	Post (prior bilateral ovariectomy OR >12 mo since LMP with no prior hysterectomy)	25	No	N1a	Stage IIA		FALSE	eebad74f-5961-4e91-b0eb-157a2f6f952b	91657171-7e5e-4a81-9201-d0b2d5806c04	LIVING	39.6	9AA68C63-2C14-430A-85C0-5A92F7FCCD36	Alive	FEMALE	TUMOR FREE	NA	2	13	Yes	BLACK OR AFRICAN AMERICAN	Primary Tumor
TCGA-E2-A1L9-01	TCGA-E2-A1L9		6th	T1c	M0	-14868		0.0944	388	465	NA	40		19.6	DiseaseFree	Negative	NOT HISPANIC OR LATINO	Tumor resection		2011-06-07	C50.9	YES	40	C50.9	8500/3	NO	0	YES	Pre (<6 months since LMP AND no prior bilateral ovariectomy AND not on estrogen replacement)	20	No	N1mi	Stage IIA		FALSE	5ea18514-51ad-4844-abea-15e82f0b10c9	644c9a14-09da-4382-a6d1-dce67f25a4ff	LIVING	19.6	97B6C43B-4C7D-49FC-BA49-00D2DF41827D	Alive	FEMALE	TUMOR FREE	NA	1	2	No	WHITE	Primary Tumor
TCGA-E2-A1LA-01	TCGA-E2-A1LA		6th	T1c	M0	-21773	allred score 5 + 3 = 8	0.339	463	581	NA	59		24.6	DiseaseFree	Negative	NOT HISPANIC OR LATINO	Tumor resection		2011-06-01	C50.9	YES	40	C50.2	8500/3	NO	0	YES	Post (prior bilateral ovariectomy OR >12 mo since LMP with no prior hysterectomy)	69	No	N1a	Stage IIA		FALSE	ce9e0309-9756-42d2-ae94-d91264a79498	cef6023a-2fbf-44ee-a9b3-df78707bd85a	LIVING	24.6	8F401B38-8D91-4F75-ADE5-52521EAA7DFE	Alive	FEMALE	TUMOR FREE	NA	1	35	No		Primary Tumor
TCGA-E2-A1LB-01	TCGA-E2-A1LB		6th	T2	M0	-15283	Allred score 0+0 = 0	0.107	972	909	NA	41		40.4	DiseaseFree	Negative	NOT HISPANIC OR LATINO	Tumor resection		2011-06-07	C50.9	YES	190	C50.4	8500/3	NO	0	YES	Pre (<6 months since LMP AND no prior bilateral ovariectomy AND not on estrogen replacement)	35	No	N1	Stage IIB		FALSE	fa176764-a76f-44c7-b97a-cd6d21e052be	26f9a1ab-fa60-47f3-ac29-96acaa68fb4a	LIVING	40.4	A868EC86-9CB6-445E-B961-5D4C57263548	Alive	FEMALE	TUMOR FREE	NA	2	25	No	BLACK OR AFRICAN AMERICAN	Primary Tumor
TCGA-E2-A1LE-01	TCGA-E2-A1LE		6th	T2	M0	-26239	Allred score 0+0 = 0	0.43	NA	986	879	71		11.9	Recurred/Progressed	Negative	NOT HISPANIC OR LATINO	Tumor resection		2011-06-07	C50.9	YES	600	C50.2	8500/3	NO	0	YES	Post (prior bilateral ovariectomy OR >12 mo since LMP with no prior hysterectomy)	62	No	N3a	Stage IIIC		FALSE	7317E605-93BA-49A9-8743-20613B02767A	CA3A64DA-CEBC-4451-AD48-5FDB6B9C26CC	DECEASED	28.9	42E3E8C1-D18A-4457-B2F0-FE49F4C027D7	Dead	FEMALE	TUMOR FREE	NA	27	28	No	WHITE	Primary Tumor
TCGA-E2-A1LG-01	TCGA-E2-A1LG		7th	T2	M0	-18492	Allred score 0+0 = 0	0.561	350	252	NA	50		18.9	DiseaseFree	Negative	NOT HISPANIC OR LATINO	Tumor resection		2011-06-03	C50.9	YES	310	C50.4	8520/3	NO	0	YES	Peri (6-12 months since last menstrual period)	104	No	N0	Stage IIA		FALSE	ef4cbd38-bc79-4d60-a715-647edd2ebe9e	b462982a-4dd0-425e-bce3-0eb8f5527264	LIVING	18.9	08A790DE-B01D-4140-BB1C-B4844291D71E	Alive	FEMALE	TUMOR FREE	NA	0	19	Yes	BLACK OR AFRICAN AMERICAN	Primary Tumor
TCGA-E2-A1LH-01	TCGA-E2-A1LH		5th	T1c	M0	-21628		0.189	2876	2998	NA	59		107	DiseaseFree	Negative	NOT HISPANIC OR LATINO	Tumor resection		2011-06-03	C50.9	YES	130	C50.9	8500/3	NO	0	YES	Post (prior bilateral ovariectomy OR >12 mo since LMP with no prior hysterectomy)	137	No	N0	Stage I		FALSE	d8ecba6a-9fff-4993-a799-9a8d2aea524e	c236908e-4814-409b-9fcc-2bedf60aa168	LIVING	107	DAB174BB-862D-49BE-9BA4-9C11C4489305	Alive	FEMALE	TUMOR FREE	NA	0	2	No	WHITE	Primary Tumor
TCGA-E2-A1LI-01	TCGA-E2-A1LI		6th	T2	M0	-21064		0.401	2750	2815	NA	57		103	DiseaseFree	Close	NOT HISPANIC OR LATINO	Tumor resection		2011-06-03	C50.9	YES	80	C50.9	8500/3	NO	0	YES	Post (prior bilateral ovariectomy OR >12 mo since LMP with no prior hysterectomy)	15	No	N1	Stage IIB		FALSE	3558dec7-eae3-4a41-a217-266c6a4535fb	55a21e0c-e8a7-43bf-8b28-0e06211114d7	LIVING	103	B3A319BE-2230-43E2-91E5-A3B3C76B85BA	Alive	FEMALE	TUMOR FREE	NA	0	2	No	WHITE	Primary Tumor
TCGA-E2-A1LK-01	TCGA-E2-A1LK		6th	T4b	M0	-30757	Allred score 0+0 = 0	0.381	NA	1051	266	84		5.09	Recurred/Progressed	Negative	NOT HISPANIC OR LATINO	Tumor resection		2011-06-03	C50.9	YES	70	C50.4	8500/3	NO	0	YES	Post (prior bilateral ovariectomy OR >12 mo since LMP with no prior hysterectomy)	32	No	N3a	Stage IIIC		FALSE	1d27253f-b036-44e7-a04d-8da5bbf57419	cc937913-802f-48cd-a490-e6b90f007c5d	DECEASED	8.74	6CC4E6EF-6664-448E-933E-FFA9117C7ABF	Dead	FEMALE	WITH TUMOR	NA	11	15	No	BLACK OR AFRICAN AMERICAN	Primary Tumor
TCGA-E2-A1LL-01	TCGA-E2-A1LL		6th	T3	MX	-27028	Allred score 0+0 = 0	0.367	1014	988	NA	73		42.8	Recurred/Progressed	Negative	NOT HISPANIC OR LATINO	Tumor resection		2011-06-03	C50.9	YES	290	C50.4	8500/3	NO	0	YES	Post (prior bilateral ovariectomy OR >12 mo since LMP with no prior hysterectomy)	30	No	N2a	Stage IIIA		FALSE	2a84997d-ccee-4f46-bea2-752534f26416	e57574e4-7e01-4e61-bd29-ee4ec63dddd6	LIVING	43	3327975F-94BE-460E-9900-E063340927BE	Alive	FEMALE	TUMOR FREE	NA	5	44	No	BLACK OR AFRICAN AMERICAN	Primary Tumor
TCGA-E2-A2P5-01	TCGA-E2-A2P5		7th	T2	M0	-28621	Allred score = 8	0.664	326	219	NA	78		16.9	DiseaseFree	Negative	NOT HISPANIC OR LATINO	Core needle biopsy		2011-12-19	C50.9	YES	260	C50.9	8520/3	NO	0	YES	Post (prior bilateral ovariectomy OR >12 mo since LMP with no prior hysterectomy)	64	No	N3	Stage IIIC		TRUE	F0DE67FF-8967-4FCE-9C12-0E07193285CD	CD8AC496-CD1B-426F-8E17-8F15BA8E94D1	LIVING	16.9	85E91C9F-9F61-4A25-B4D9-1BCBC7108F5E	Alive	FEMALE	TUMOR FREE	NA	21	25	Yes	BLACK OR AFRICAN AMERICAN	Primary Tumor
TCGA-E2-A2P6-01	TCGA-E2-A2P6		7th	T2	M0	-28411	Allread score 5+3 = 8	0.14	168	174	NA	77		5.52	DiseaseFree	Positive	HISPANIC OR LATINO	Core needle biopsy		2011-12-19	C50.9	YES	80	C50.9	8520/3	NO	0	YES	Post (prior bilateral ovariectomy OR >12 mo since LMP with no prior hysterectomy)	106	No	N1	Stage IIB		TRUE	F83B866B-0B2E-4BBA-9367-BE6DCCF56232	3BC62725-AD6D-4685-BC50-0F1127363D90	LIVING	5.52	E6A21CE6-841D-4D9B-A563-80B9BAF6E682	Alive	FEMALE	TUMOR FREE	NA	1	5	No		Primary Tumor
TCGA-E2-A3DX-01	TCGA-E2-A3DX		7th	T2	M0	-15969		0.0199	217	142	NA	43		15.7	DiseaseFree	Positive	NOT HISPANIC OR LATINO	Core needle biopsy		2012-01-17	C50.9	YES	180	C50.9	8520/3	NO	0	YES	Pre (<6 months since LMP AND no prior bilateral ovariectomy AND not on estrogen replacement)	12	No	N3	Stage IIIC		FALSE	31427699-E27A-4035-8925-6D8D6900D097	796DF715-916F-46E4-9DA1-E19C94958E07	LIVING	15.7	3B7CA8ED-58E2-4609-BE41-46525D3732E7	Alive	FEMALE	TUMOR FREE	NA	25	36	No	WHITE	Primary Tumor
TCGA-E9-A1N3-01	TCGA-E9-A1N3		7th	T1c	M0	-25714		0.0779	0	65	NA	70		0	DiseaseFree	Negative	NOT HISPANIC OR LATINO	Tumor resection		2011-05-26	C50.9	YES	230	C50.9	8522/3	NO	0	YES	Post (prior bilateral ovariectomy OR >12 mo since LMP with no prior hysterectomy)	27	No	N2	Stage IIIA		TRUE	03c143e0-d8a1-4d60-a4a3-df0501fc6b6e	a3ac21e2-b92b-4597-a870-8444ddc6b4d6	LIVING	0	4F50E811-0743-440B-9094-6BA0F40BD734	Alive	FEMALE		NA	7	7	No	WHITE	Primary Tumor
TCGA-E9-A1N4-01	TCGA-E9-A1N4		7th	T2	M0	-15055		0.189	5	65	NA	41		19.2	DiseaseFree	Negative	NOT HISPANIC OR LATINO	Tumor resection		2011-05-26	C50.9	YES	310	C50.9	8520/3	NO	0	YES	Pre (<6 months since LMP AND no prior bilateral ovariectomy AND not on estrogen replacement)	18	No	N2	Stage IIIA		TRUE	69a68fbc-e43d-4652-85ee-693211bded47	8d122839-4167-48b2-9f3a-7ff7c3f134d8	LIVING	19.2	64B91C7E-E6D8-4952-B49F-0F5D57332994	Alive	FEMALE	TUMOR FREE	0	4	7	No	WHITE	Primary Tumor
TCGA-E9-A1N5-01	TCGA-E9-A1N5		7th	T2	M0	-16736		0.185	0	63	NA	45		36.8	DiseaseFree	Negative	NOT HISPANIC OR LATINO	Tumor resection		2011-06-23	C50.9	YES	190	C50.9	8522/3	NO	0	YES	Post (prior bilateral ovariectomy OR >12 mo since LMP with no prior hysterectomy)	29	No	N1	Stage IIB		TRUE	f954de05-1b44-4087-8933-6cc72d81028d	cc07e1f1-e1e7-4335-ab8b-b7bebef1669f	LIVING	36.8	224A51C8-8EEB-424C-AD88-44C4321050EA	Alive	FEMALE	TUMOR FREE	0	2	11	No	WHITE	Primary Tumor
TCGA-E9-A1N6-01	TCGA-E9-A1N6		7th	T2	M0	-19327		0.246	0	63	NA	52		13.5	DiseaseFree	Negative	NOT HISPANIC OR LATINO	Tumor resection		2011-06-23	C50.9	YES	220	C50.9	8500/3	NO	0	YES	Post (prior bilateral ovariectomy OR >12 mo since LMP with no prior hysterectomy)	NA	No	N1	Stage IIB		TRUE	955d4263-61f7-42e8-8a6e-772a0d6c209d	50a70e24-2ce8-43fd-87d7-eab2c1fa9a86	LIVING	13.5	910A4342-BBC1-47AE-9316-695B0CD0375D	Alive	FEMALE	TUMOR FREE	0	2	10	No	WHITE	Primary Tumor
TCGA-E9-A1N8-01	TCGA-E9-A1N8		7th	T2	M0	-17652		0.728	0	66	NA	48		12	DiseaseFree	Negative	NOT HISPANIC OR LATINO	Tumor resection		2011-06-23	C50.9	YES	680	C50.9	8500/3	NO	0	YES	Post (prior bilateral ovariectomy OR >12 mo since LMP with no prior hysterectomy)	31	No	N0	Stage IIA		TRUE	ac075bc0-1b59-4557-beea-541694faee03	28e05d2f-0559-425a-accf-d5b4c1152548	LIVING	12	4F15F8D6-9F34-4A61-A006-E5E7A2E68207	Alive	FEMALE	TUMOR FREE	0	0	8	No	WHITE	Primary Tumor
TCGA-E9-A1N9-01	TCGA-E9-A1N9		7th	T2	M0	-21228		0.424	0	44	NA	58		13.1	DiseaseFree	Negative	NOT HISPANIC OR LATINO	Tumor resection		2011-06-23	C50.9	YES	230	C50.9	8522/3	NO	0	YES	Post (prior bilateral ovariectomy OR >12 mo since LMP with no prior hysterectomy)	44	No	N0	Stage IIA		TRUE	994ca1f5-ad10-44ec-aa21-71fc2940653b	3c2bed9f-2ab5-4623-b631-99e394d7723d	LIVING	13.1	39D6D1DE-2CAE-470F-836B-926242F46E67	Alive	FEMALE	TUMOR FREE	0	0	8	No	WHITE	Primary Tumor
TCGA-E9-A1NA-01	TCGA-E9-A1NA		7th	T2	M0	-21397		0.387	0	42	NA	58		36.5	DiseaseFree	Negative	NOT HISPANIC OR LATINO	Tumor resection		2011-06-23	C50.9	YES	110	C50.9	8522/3	NO	0	YES	Post (prior bilateral ovariectomy OR >12 mo since LMP with no prior hysterectomy)	84	No	N0	Stage IIA		TRUE	af577366-0258-49e7-b6af-e70056c081a4	e2ef6df2-c375-4c59-ae1b-c8cca22a8387	LIVING	36.5	595BB256-2F3D-493A-AA90-022BE0CC995F	Alive	FEMALE	TUMOR FREE	0	0	11	No	WHITE	Primary Tumor
TCGA-E9-A1ND-01	TCGA-E9-A1ND		7th	T2	M0	-27400		0.131	0	37	NA	75		12.6	DiseaseFree	Negative	NOT HISPANIC OR LATINO	Tumor resection		2011-06-23	C50.9	YES	420	C50.9	8500/3	NO	0	YES	Post (prior bilateral ovariectomy OR >12 mo since LMP with no prior hysterectomy)	76	No	N1	Stage IIB		TRUE	f06f09f3-8133-4a92-ac86-fbe64295e0d8	b41b1f04-226e-466c-b5e1-f61e45ad3210	LIVING	12.6	AC26EE69-27D8-4523-917A-68573F5F614E	Alive	FEMALE	TUMOR FREE	0	1	11	No	WHITE	Primary Tumor
TCGA-E9-A1NE-01	TCGA-E9-A1NE		7th	T2	M0	-10564		0.0132	0	31	NA	28		35.7	DiseaseFree	Negative	NOT HISPANIC OR LATINO	Tumor resection		2011-06-23	C50.9	YES	280	C50.9	8522/3	NO	0	YES	Pre (<6 months since LMP AND no prior bilateral ovariectomy AND not on estrogen replacement)	40	No	N1	Stage IIB		TRUE	3d676bba-154b-4d22-ab59-d4d4da051b94	0ca24149-4cc4-4ad1-b448-4cc33fef851e	LIVING	35.7	CF6E29A2-FAE6-45BB-B625-33877887A89E	Alive	FEMALE	TUMOR FREE	0	1	2	No	WHITE	Primary Tumor
TCGA-E9-A1NF-01	TCGA-E9-A1NF		7th	T2	M0	-21981		0.496	0	31	NA	60		2.96	Recurred/Progressed	Negative	NOT HISPANIC OR LATINO	Tumor resection		2011-06-23	C50.9	YES	240	C50.9	8522/3	NO	0	YES	Post (prior bilateral ovariectomy OR >12 mo since LMP with no prior hysterectomy)	47	No	N0	Stage IIA		TRUE	a8b1f6e7-2bcf-460d-b1c6-1792a9801119	0c30cd0e-a2d2-42b0-9ca9-8297de64e4a8	LIVING	20	740CF6E1-C742-47DC-8057-9D73AF4D6171	Alive	FEMALE	TUMOR FREE	0	0	9	No	WHITE	Primary Tumor
TCGA-E9-A1NG-01	TCGA-E9-A1NG		7th	T2	M0	-22896		0.0874	0	30	NA	62		NA		Negative	NOT HISPANIC OR LATINO	Tumor resection		2011-06-23	C50.9	YES	380	C50.9	8500/3	NO	0	YES	Post (prior bilateral ovariectomy OR >12 mo since LMP with no prior hysterectomy)	22	No	N0	Stage IIA		TRUE	659b0170-e914-45ff-aa55-fcb8d3dc7b8a	7adf414b-c3f7-4e2c-aa80-81d3edd9764e	DECEASED	25.8	73953A70-DAC0-443A-AC04-28BDA8D5F673	Dead	FEMALE	TUMOR FREE	0	0	5	No	WHITE	Primary Tumor
TCGA-E9-A1NH-01	TCGA-E9-A1NH		7th	T2	M0	-26221		0.123	0	30	NA	71		0	DiseaseFree	Negative	NOT HISPANIC OR LATINO	Tumor resection		2011-06-23	C50.9	YES	140	C50.9	8500/3	NO	0	YES	Post (prior bilateral ovariectomy OR >12 mo since LMP with no prior hysterectomy)	19	No	N1	Stage IIB		TRUE	b2aac45b-2073-4c7a-adb9-769a4fdcc111	fb0b2d84-d982-4d3a-9803-36420f2e7e46	LIVING	0	A6248687-C0C0-4DEF-9D92-196CBDB5CBDE	Alive	FEMALE		0	3	5	No	WHITE	Primary Tumor
TCGA-E9-A1NI-01	TCGA-E9-A1NI		7th	T2	M0	-18985		0.395	-7	21	NA	51		9.86	DiseaseFree	Negative	NOT HISPANIC OR LATINO	Tumor resection		2011-06-23	C50.9	YES	280	C50.9	8522/3	NO	0	YES	Post (prior bilateral ovariectomy OR >12 mo since LMP with no prior hysterectomy)	119	No	N0	Stage IIA		TRUE	c65b835a-2d38-4250-a173-0780d2c2cf58	558c43ad-12ad-42dd-94b2-80a607465fcb	LIVING	9.86	3F4F5A98-F6EA-46D5-95E8-6797D419328A	Alive	FEMALE	TUMOR FREE	0	0	4	No	WHITE	Primary Tumor
TCGA-E9-A1QZ-01	TCGA-E9-A1QZ		7th	T2	M0	-22397		0.104	0	58	NA	61		11.9	DiseaseFree	Negative	NOT HISPANIC OR LATINO	Tumor resection		2011-07-28	C50.9	YES	590	C50.9	8500/3	NO	0	YES	Post (prior bilateral ovariectomy OR >12 mo since LMP with no prior hysterectomy)	13	No	N0	Stage IIA		TRUE	b6b932ce-6856-4d94-9e6c-16dfbe51906f	ec76e770-ba6b-4294-a992-993183640ff8	LIVING	11.9	864BB34A-1008-480C-A3B5-A2C616E95C49	Alive	FEMALE	TUMOR FREE	NA	0	19	No	WHITE	Primary Tumor
TCGA-E9-A1R0-01	TCGA-E9-A1R0		7th	T1c	M0	-21394		0.097	0	44	NA	58		14.3	DiseaseFree		NOT HISPANIC OR LATINO	Tumor resection		2011-07-28	C50.9	YES	400	C50.9	8500/3	NO	0	YES	Post (prior bilateral ovariectomy OR >12 mo since LMP with no prior hysterectomy)	22	No	N1	Stage IIA		TRUE	f2da1d3f-f226-4c99-a97e-9b26f67d7a5d	e61781e7-6c4e-4a6f-8f8d-22896b1243ca	LIVING	14.3	DD0ADC20-2059-435E-9EB4-351C87D7CBEB	Alive	FEMALE	TUMOR FREE	NA	1	12	No	WHITE	Primary Tumor
TCGA-E9-A1R2-01	TCGA-E9-A1R2		7th	T2	MX	-18936		0.323	19	64	NA	51		0.62	DiseaseFree	Positive	NOT HISPANIC OR LATINO	Core needle biopsy		2011-07-28	C50.9	YES	160	C50.9	8500/3	NO	0	YES	Post (prior bilateral ovariectomy OR >12 mo since LMP with no prior hysterectomy)	51	No	N3	Stage IIIC		TRUE	8631969d-4ac6-4fe1-9db3-d47db604494a	92b16015-e552-48e3-a095-0197b99b52a8	LIVING	0.62	5B9C0E4A-3958-4ECF-B8B2-E758E04E7722	Alive	FEMALE		NA	17	19	No	WHITE	Primary Tumor
TCGA-E9-A1R3-01	TCGA-E9-A1R3		7th	T2	M0	-25693		0.333	64	80	NA	70		2.1	DiseaseFree	Negative	NOT HISPANIC OR LATINO	Core needle biopsy		2011-07-28	C50.9	YES	420	C50.9	8500/3	NO	0	YES	Post (prior bilateral ovariectomy OR >12 mo since LMP with no prior hysterectomy)	23	No	N3	Stage IIIC		TRUE	4922cddc-575c-4b8a-8245-ce5f6876760c	27c9fa1c-e5e1-40d3-8d25-81f10d27d984	LIVING	2.1	BE186852-8596-4CDB-B5C4-AA5838C15B5F	Alive	FEMALE	TUMOR FREE	NA	10	10	No	WHITE	Primary Tumor
TCGA-E9-A1R4-01	TCGA-E9-A1R4		7th	T1c	M0	-24181		0.317	29	45	NA	66		6.11	DiseaseFree	Negative	NOT HISPANIC OR LATINO	Other method, specify:	Lumpectomy	2011-07-28	C50.9	YES	430	C50.9	8500/3	NO	0	YES	Post (prior bilateral ovariectomy OR >12 mo since LMP with no prior hysterectomy)	102	No	N0	Stage IA		TRUE	b7a4df9a-4e25-4550-9c10-338ca1921c2f	ea78a749-5aee-44e6-9592-b2e20eeb7ff9	LIVING	6.11	AA095896-8217-4BEE-97EC-BC79F5C395BA	Alive	FEMALE	TUMOR FREE	NA	0	10	No	WHITE	Primary Tumor
TCGA-E9-A1R5-01	TCGA-E9-A1R5		7th	T1c	M0	-23116		0.258	42	58	NA	63		1.38	DiseaseFree	Negative	NOT HISPANIC OR LATINO	Cytology (e.g. Peritoneal or pleural fluid)		2011-07-28	C50.9	YES	370	C50.9	8500/3	NO	0	YES	Post (prior bilateral ovariectomy OR >12 mo since LMP with no prior hysterectomy)	34	No	N0	Stage IA		TRUE	23c21dea-3713-408f-ba56-f7c586e9f206	9f6511cf-f17a-48b9-8e58-9c251bd5e8f4	LIVING	1.38	141B770B-22DD-4C87-AFF7-04D85FC9C74A	Alive	FEMALE	TUMOR FREE	NA	0	10	No	WHITE	Primary Tumor
TCGA-E9-A1R6-01	TCGA-E9-A1R6		7th	T2	M0	-23347		0.451	84	100	NA	63		2.76	DiseaseFree	Negative	NOT HISPANIC OR LATINO	Cytology (e.g. Peritoneal or pleural fluid)		2011-07-28	C50.9	YES	730	C50.9	8500/3	NO	0	YES	Post (prior bilateral ovariectomy OR >12 mo since LMP with no prior hysterectomy)	28	No	N0	Stage IIA		TRUE	4842bac3-abaa-4900-871f-f2c3ba6457f5	061e539b-4cde-4e37-bbcf-30937ce689c9	LIVING	2.76	8A865E33-082A-454F-A6DF-89E994206E65	Alive	FEMALE	TUMOR FREE	NA	0	10	No	WHITE	Primary Tumor
TCGA-E9-A1R7-01	TCGA-E9-A1R7		7th	T2	M0	-23397		0.383	34	51	NA	64		21.2	DiseaseFree	Negative	NOT HISPANIC OR LATINO	Cytology (e.g. Peritoneal or pleural fluid)		2011-07-28	C50.9	YES	400	C50.9	8500/3	NO	0	YES	Post (prior bilateral ovariectomy OR >12 mo since LMP with no prior hysterectomy)	48	No	N0	Stage IIA		TRUE	2680da86-c977-4611-b75f-df015283c023	8d9f2037-1c1f-4c73-a993-dc4c2aa67d30	LIVING	21.2	FA19C3C4-E13B-464B-84CC-3AF7E83D5B9C	Alive	FEMALE	TUMOR FREE	NA	0	10	No	WHITE	Primary Tumor
TCGA-E9-A1RB-01	TCGA-E9-A1RB		7th	T2	M0	-14755		0.604	21	39	NA	40		NA		Negative	NOT HISPANIC OR LATINO	Cytology (e.g. Peritoneal or pleural fluid)		2011-07-28	C50.9	YES	490	C50.9	8500/3	NO	0	YES	Pre (<6 months since LMP AND no prior bilateral ovariectomy AND not on estrogen replacement)	22	No	N0	Stage IIA		TRUE	94b95984-b2fb-4e42-8887-45e7086c3179	43993e01-588a-40de-80ec-72c1a66fe70b	DECEASED	32.1	3BE8EA29-3C5F-4339-9CE7-98994B545848	Dead	FEMALE	TUMOR FREE	0	0	10	No	WHITE	Primary Tumor
TCGA-E9-A1RC-01	TCGA-E9-A1RC		7th	T4b	M0	-20795		0.3	1224	1246	NA	56		40.2	DiseaseFree	Negative	NOT HISPANIC OR LATINO	Cytology (e.g. Peritoneal or pleural fluid)		2011-07-28	C50.9	YES	620	C50.9	8522/3	NO	0	YES	Post (prior bilateral ovariectomy OR >12 mo since LMP with no prior hysterectomy)	40	No	N3	Stage IIIC		TRUE	5cdae21d-eee5-478f-932a-0f51fcf5f031	9eaa7f15-8a97-4a49-9e93-b5790a1fade0	LIVING	40.2	D10A419F-B161-4998-97DE-45DF70F4E212	Alive	FEMALE	TUMOR FREE	0	10	10	No	WHITE	Primary Tumor
TCGA-E9-A1RD-01	TCGA-E9-A1RD		7th	T2	M0	-24719		0.226	20	38	NA	67		0.66	DiseaseFree	Negative	NOT HISPANIC OR LATINO	Cytology (e.g. Peritoneal or pleural fluid)		2011-07-28	C50.9	YES	340	C50.9	8500/3	NO	0	YES	Post (prior bilateral ovariectomy OR >12 mo since LMP with no prior hysterectomy)	19	No	N0	Stage IIA		TRUE	5fe3c51f-65e2-4da6-8924-a6fae17c022d	d19fe184-84a8-4a49-a4d4-75891670da4d	LIVING	0.66	EDDEB48B-B712-40B0-9DE5-9F5B5791AF4D	Alive	FEMALE	TUMOR FREE	NA	0	10	No	WHITE	Primary Tumor
TCGA-E9-A1RE-01	TCGA-E9-A1RE		7th	T2	M0	-27392		0.512	47	65	NA	74		25.7	DiseaseFree	Negative	NOT HISPANIC OR LATINO	Cytology (e.g. Peritoneal or pleural fluid)		2011-07-28	C50.9	YES	730	C50.9	8500/3	NO	0	YES	Post (prior bilateral ovariectomy OR >12 mo since LMP with no prior hysterectomy)	48	No	N2	Stage IIIA		TRUE	24046547-d038-4616-b190-52ac93f4965f	d2d7f976-2330-47aa-b1b3-947b3182b0b0	LIVING	25.7	80831A1A-95BD-4ECD-B7D9-6DDCD5313B25	Alive	FEMALE	TUMOR FREE	NA	9	10	No	WHITE	Primary Tumor
TCGA-E9-A1RF-01	TCGA-E9-A1RF		7th	T2	M0	-25119		0.407	38	56	NA	68		6.57	DiseaseFree	Negative	NOT HISPANIC OR LATINO	Cytology (e.g. Peritoneal or pleural fluid)		2011-08-02	C50.9	YES	330	C50.9	8500/3	NO	0	YES	Post (prior bilateral ovariectomy OR >12 mo since LMP with no prior hysterectomy)	119	No	N2	Stage IIIA		TRUE	c694615c-b1c6-499c-8058-995633ebf948	ca0d78dc-c860-4835-ad07-052f176804a4	LIVING	6.57	50F3690C-2082-4590-A923-656C5F226FAE	Alive	FEMALE	TUMOR FREE	NA	5	10	No	WHITE	Primary Tumor
TCGA-E9-A1RH-01	TCGA-E9-A1RH		7th	T2	M0	-23224		0.429	14	32	NA	63		34.6	DiseaseFree	Negative	NOT HISPANIC OR LATINO	Cytology (e.g. Peritoneal or pleural fluid)		2011-08-02	C50.9	YES	410	C50.9	8500/3	NO	0	YES	Post (prior bilateral ovariectomy OR >12 mo since LMP with no prior hysterectomy)	76	No	N0	Stage IIA		TRUE	408cb583-6dc3-4698-8bd2-e284042bd5ef	6b1bb382-0103-4207-a0e8-871aa6aae81c	LIVING	34.6	FA93BDAA-B56E-4217-9022-4EBE6009FCF7	Alive	FEMALE	TUMOR FREE	NA	0	10	No	WHITE	Primary Tumor
TCGA-E9-A1RI-01	TCGA-E9-A1RI		7th	T1c	M0	-15942		0.119	48	64	NA	43		35.6	DiseaseFree	Negative	NOT HISPANIC OR LATINO	Cytology (e.g. Peritoneal or pleural fluid)		2011-07-28	C50.9	YES	290	C50.9	8522/3	NO	0	YES	Pre (<6 months since LMP AND no prior bilateral ovariectomy AND not on estrogen replacement)	13	No	N2	Stage IIIA		TRUE	dd3bfb26-b534-4917-9c4d-9fe7b6477762	7423f6fa-4f31-46b1-a391-b5fc45833c2b	LIVING	35.6	91303D10-CC36-47CF-BF14-E1DCE0157D1C	Alive	FEMALE	TUMOR FREE	NA	5	10	No	WHITE	Primary Tumor
TCGA-E9-A226-01	TCGA-E9-A226		7th	T2	M0	-16511		0.256	16	48	NA	45		25.9	Recurred/Progressed	Negative	NOT HISPANIC OR LATINO	Cytology (e.g. Peritoneal or pleural fluid)		2011-08-03	C50.9	YES	510	C50.9	8500/3	NO	0	YES	Pre (<6 months since LMP AND no prior bilateral ovariectomy AND not on estrogen replacement)	28	No	N2	Stage IIIA		TRUE	dd67408e-46ba-4573-9415-d4814e9f84de	c1adf54e-8248-4b44-a9a1-e883fcc4f702	LIVING	34.1	7C8F01DC-9CD9-4D61-9032-BC9F28A687EE	Alive	FEMALE	TUMOR FREE	NA	6	10	No	WHITE	Primary Tumor
TCGA-E9-A227-01	TCGA-E9-A227		7th	T2	M0	-15602		0.0506	24	66	NA	42		0.79	DiseaseFree	Positive	NOT HISPANIC OR LATINO	Core needle biopsy		2011-07-28	C50.9	YES	180	C50.9	8500/3	NO	0	YES	Pre (<6 months since LMP AND no prior bilateral ovariectomy AND not on estrogen replacement)	15	No	N1	Stage IIB		TRUE	89a8da07-4487-47c6-8d3c-442a87e4f632	409b906a-5e2c-4ce6-bc85-20a59fa383f4	LIVING	0.79	13CA22BB-5EA5-46C9-82D3-77867122D1B4	Alive	FEMALE		NA	1	17	No	WHITE	Primary Tumor
TCGA-E9-A228-01	TCGA-E9-A228		7th	T2	M0	-21294		0.17	0	42	NA	58		12.5	DiseaseFree	Negative	NOT HISPANIC OR LATINO	Tumor resection		2011-08-02	C50.9	YES	740	C50.9	8500/3	NO	0	YES	Post (prior bilateral ovariectomy OR >12 mo since LMP with no prior hysterectomy)	38	No	N1	Stage IIB		TRUE	b95eef8a-205f-4cf8-9d3c-ae51d406e1e0	6d129f34-7de2-4f8a-b150-e6111c5845cc	LIVING	12.5	B0E8F3C1-E996-4E70-9630-AC95AF6E4EDC	Alive	FEMALE	TUMOR FREE	NA	2	12	No	WHITE	Primary Tumor
TCGA-E9-A229-01	TCGA-E9-A229		7th	T1c	M0	-13817		0.164	0	56	NA	37		13.3	DiseaseFree	Negative	NOT HISPANIC OR LATINO	Tumor resection		2011-08-02	C50.9	YES	160	C50.9	8500/3	NO	0	YES	Pre (<6 months since LMP AND no prior bilateral ovariectomy AND not on estrogen replacement)	14	No	N0	Stage IA		TRUE	cea9d8f9-e18c-4947-a461-5f712e3c1e6d	c3927b5c-d641-45e5-87ea-9cc18c7ec85e	LIVING	13.3	15FA41AE-3A0F-4112-828B-EE8687A6F158	Alive	FEMALE	TUMOR FREE	NA	0	14	No	WHITE	Primary Tumor
TCGA-E9-A22A-01	TCGA-E9-A22A		7th	T2	M0	-27288		0.312	0	59	NA	74		23.4	DiseaseFree	Negative	NOT HISPANIC OR LATINO	Tumor resection		2011-08-02	C50.9	YES	340	C50.9	8500/3	NO	0	YES	Post (prior bilateral ovariectomy OR >12 mo since LMP with no prior hysterectomy)	31	No	N0	Stage IIA		TRUE	4aacbc42-5ac5-4339-b9fa-c6e812084837	0f0cca8e-770c-45df-a6cc-466cc9328637	LIVING	23.4	BC3061B7-9C99-4270-84EE-B1306FA01AE2	Alive	FEMALE	TUMOR FREE	0	0	2	No	WHITE	Primary Tumor
TCGA-E9-A22B-01	TCGA-E9-A22B		7th	T1c	M0	-26278		0.241	0	59	NA	71		22.7	DiseaseFree	Negative	NOT HISPANIC OR LATINO	Tumor resection		2011-08-02	C50.9	YES	250	C50.9	8522/3	NO	0	YES	Post (prior bilateral ovariectomy OR >12 mo since LMP with no prior hysterectomy)	47	No	N0	Stage IA		TRUE	b956df1b-bc77-4bdb-a5bd-5dda7b4c8da7	3f1e9bda-addf-4e24-a92f-123085bf40bc	LIVING	22.7	FC896EB8-1CEC-46A0-82E1-E3FBFAAB69F1	Alive	FEMALE	TUMOR FREE	0	0	4	No	WHITE	Primary Tumor
TCGA-E9-A22D-01	TCGA-E9-A22D		7th	T2	M0	-14115		0.23	0	52	NA	38		0	DiseaseFree	Negative	NOT HISPANIC OR LATINO	Tumor resection		2011-08-02	C50.9	YES	620	C50.9	8500/3	NO	0	YES	Pre (<6 months since LMP AND no prior bilateral ovariectomy AND not on estrogen replacement)	18	No	N0	Stage IIA		TRUE	cf0a3f38-5850-44e1-8574-808bd37d84a3	0d7c1a37-5da1-4257-a118-b7d0717f23da	LIVING	0	ED60F792-A71B-4BAE-A536-5FF6D8C3DEAA	Alive	FEMALE		0	0	10	No	WHITE	Primary Tumor
TCGA-E9-A22E-01	TCGA-E9-A22E		7th	T2	M0	-20574		0.432	0	52	NA	56		12.9	DiseaseFree	Negative	NOT HISPANIC OR LATINO	Tumor resection		2011-08-02	C50.9	YES	620	C50.9	8500/3	NO	0	YES	Post (prior bilateral ovariectomy OR >12 mo since LMP with no prior hysterectomy)	74	No	N2	Stage IIIA		TRUE	64d4dfae-8d91-464b-adc3-80ba7caf54ae	147a9822-8704-4a7f-b856-9a659f4717b3	LIVING	12.9	7788E7FD-B5A3-4B22-83CA-EA3FB5E826FC	Alive	FEMALE	TUMOR FREE	0	4	10	No	WHITE	Primary Tumor
TCGA-E9-A22G-01	TCGA-E9-A22G		7th	T2	M0	-17300		0.877	0	45	NA	47		0	DiseaseFree	Negative	NOT HISPANIC OR LATINO	Tumor resection		2011-08-02	C50.9	YES	650	C50.9	8500/3	NO	0	YES	Post (prior bilateral ovariectomy OR >12 mo since LMP with no prior hysterectomy)	80	No	N0	Stage IIA		TRUE	56033839-35d5-4d72-8b8c-400cb345263d	55e28aaf-8025-4b46-97d3-96cdf512a609	LIVING	0	E34F4BF0-A0C3-4C72-8E3A-F319D4CDDD5D	Alive	FEMALE	TUMOR FREE	0	0	6	No	WHITE	Primary Tumor
TCGA-E9-A22H-01	TCGA-E9-A22H		7th	T2	M0	-15504		0.104	0	38	NA	42		24.1	DiseaseFree	Negative	NOT HISPANIC OR LATINO	Tumor resection		2011-08-02	C50.9	YES	500	C50.9	8500/3	NO	0	YES	Pre (<6 months since LMP AND no prior bilateral ovariectomy AND not on estrogen replacement)	22	No	N1	Stage IIB		TRUE	161917b8-88ad-407b-ade6-d6b98478b359	9ff0477c-10cd-47d6-8d0d-4e763ea185a8	LIVING	24.1	672E4D81-DA47-495C-A58B-BD2B4FEA2380	Alive	FEMALE	TUMOR FREE	0	1	8	No	WHITE	Primary Tumor
TCGA-E9-A243-01	TCGA-E9-A243		7th	T2	M0	-19035		0.101	43	94	NA	52		10	Recurred/Progressed	Negative	NOT HISPANIC OR LATINO	Cytology (e.g. Peritoneal or pleural fluid)		2011-08-17	C50.9	YES	270	C50.9	8500/3	NO	0	YES	Peri (6-12 months since last menstrual period)	53	No	N0 (i-)	Stage IIA		TRUE	d4a1ecdc-399c-4f82-aa7a-68a0c82ded3f	ae72a901-e7b7-41cf-8eeb-2a7fb51e14f0	LIVING	17.1	742A4812-9EB1-4348-996E-3F1AD7FA3E5D	Alive	FEMALE		NA	0	10	No	WHITE	Primary Tumor
TCGA-E9-A244-01	TCGA-E9-A244		7th	T2	M0	-19778		0.376	21	58	NA	54		0.69	DiseaseFree	Negative	NOT HISPANIC OR LATINO	Cytology (e.g. Peritoneal or pleural fluid)		2011-03-15	C50.9	YES	310	C50.9	8500/3	NO	0	YES	Post (prior bilateral ovariectomy OR >12 mo since LMP with no prior hysterectomy)	71	No	N0 (i-)	Stage IIA		TRUE	a4c59287-1ad5-46a5-8040-e591e6ce064f	51e96168-f2d8-4827-9910-66264b410b4c	LIVING	0.69	4158FEAB-066B-4500-8FD2-3F197438DFB5	Alive	FEMALE	TUMOR FREE	NA	0	10	No	WHITE	Primary Tumor
TCGA-E9-A245-01	TCGA-E9-A245		7th	T2	M0	-17363		0.0345	26	62	NA	47		NA		Negative	NOT HISPANIC OR LATINO	Cytology (e.g. Peritoneal or pleural fluid)		2011-03-16	C50.9	YES	490	C50.9	8500/3	NO	0	YES	Pre (<6 months since LMP AND no prior bilateral ovariectomy AND not on estrogen replacement)	16	No	N1	Stage IIB		TRUE	8218119a-f68b-4ea7-9ee4-5e2edc2ae342	dc85267a-0ce1-439e-9ecf-e5a13ad06f26	DECEASED	NA	5F2A52E5-2844-4242-8CE4-A87DF9D9C97B	Dead	FEMALE	TUMOR FREE	NA	3	10	No	WHITE	Primary Tumor
TCGA-E9-A247-01	TCGA-E9-A247		7th	T1c	M0	-21562		0.701	13	49	NA	59		27.2	DiseaseFree	Negative	NOT HISPANIC OR LATINO	Other method, specify:	Lumpectomy	2011-08-18	C50.9	YES	370	C50.9	8500/3	NO	0	YES	Post (prior bilateral ovariectomy OR >12 mo since LMP with no prior hysterectomy)	38	No	N0 (i-)	Stage IA		TRUE	636b0a90-c8c2-4ad6-a77d-6cd428a826d1	c6f8aca1-259f-48ab-a470-a1afecb8a2a9	LIVING	27.2	61E73960-32B0-413E-AF1D-2EF4582293B3	Alive	FEMALE	TUMOR FREE	NA	0	10	No	WHITE	Primary Tumor
TCGA-E9-A248-01	TCGA-E9-A248		7th	T2	M0	-18684		0.079	22	52	NA	51		1.94	DiseaseFree	Negative	NOT HISPANIC OR LATINO	Cytology (e.g. Peritoneal or pleural fluid)		2011-03-22	C50.9	YES	540	C50.9	8500/3	NO	0	YES	Peri (6-12 months since last menstrual period)	21	No	N0 (i-)	Stage IIA		TRUE	539bbbed-43fb-4fef-9c67-6406f58b186a	02ec11f4-1d26-4d2f-babe-d576ebfff1c7	LIVING	1.94	8950E632-451D-4436-9AA2-740CB08237E8	Alive	FEMALE	TUMOR FREE	NA	0	10	No	WHITE	Primary Tumor
TCGA-E9-A249-01	TCGA-E9-A249		7th	T2	M0	-16689		0.402	29	59	NA	45		0.95	DiseaseFree	Negative	NOT HISPANIC OR LATINO	Cytology (e.g. Peritoneal or pleural fluid)		2011-03-22	C50.9	YES	470	C50.9	8500/3	NO	0	YES	Pre (<6 months since LMP AND no prior bilateral ovariectomy AND not on estrogen replacement)	12	No	N0 (i-)	Stage IIA		TRUE	fb3607eb-858e-4ecd-8477-95140658c6d2	bf8eb507-a277-4f3a-a605-313cd37f18b4	LIVING	0.95	6272ED78-501A-4055-8C87-430F46F518AA	Alive	FEMALE		NA	0	10	No	WHITE	Primary Tumor
TCGA-E9-A24A-01	TCGA-E9-A24A		7th	T1c	M0	-25370		0.127	11	41	NA	69		12.6	DiseaseFree	Negative	NOT HISPANIC OR LATINO	Other method, specify:	Lumpectomy	2011-03-22	C50.9	YES	390	C50.9	8500/3	NO	0	YES	Post (prior bilateral ovariectomy OR >12 mo since LMP with no prior hysterectomy)	25	No	N1	Stage IIA		TRUE	9f3cc92b-fa22-478e-a2e4-6b4c8afb93d6	91202959-0b44-43ba-961c-58c9de842d76	LIVING	12.6	392524F7-B570-4047-A439-71FC15642DC8	Alive	FEMALE	TUMOR FREE	NA	1	10	No	WHITE	Primary Tumor
TCGA-E9-A295-01	TCGA-E9-A295		7th	T2	M0	-25957		0.446	22	63	NA	71		0.72	DiseaseFree	Negative	NOT HISPANIC OR LATINO	Tumor resection		2011-09-12	C50.9	YES	670	C50.9	8500/3	NO	0	YES	Post (prior bilateral ovariectomy OR >12 mo since LMP with no prior hysterectomy)	66	No	N0 (i-)	Stage IIA		FALSE	fec0da58-1047-44d2-b6d1-c18cceed43dc	3944bcd6-1a95-4297-8cf3-7e7d38b9390e	LIVING	0.72	A23D86FF-CCA9-42B2-B6AE-9E365AAC03C8	Alive	FEMALE	TUMOR FREE	0	0	7	No	WHITE	Primary Tumor
TCGA-E9-A2JS-01	TCGA-E9-A2JS		7th	T2	M0	-26407		0.619	13	79	NA	72		17.2	Recurred/Progressed	Negative	NOT HISPANIC OR LATINO	Cytology (e.g. Peritoneal or pleural fluid)		2011-12-20	C50.9	YES	420	C50.9	8520/3	NO	0	YES	Post (prior bilateral ovariectomy OR >12 mo since LMP with no prior hysterectomy)	46	No	N1	Stage IIB		TRUE	4A831893-F4CA-4357-A756-B5E954E35DD7	C18A3E05-F8EE-454C-89B2-5659045BA68E	DECEASED	29.7	1DFFCBD1-962D-4E9B-BEE1-726CABE3AA95	Dead	FEMALE	TUMOR FREE	NA	1	10	No	WHITE	Primary Tumor
TCGA-E9-A2JT-01	TCGA-E9-A2JT		7th	T2	M0	-23318		0.001857	23	94	NA	63		0.76	DiseaseFree	Negative	NOT HISPANIC OR LATINO	Cytology (e.g. Peritoneal or pleural fluid)		2011-12-20	C50.9	YES	260	C50.9	8520/3	NO	0	YES	Post (prior bilateral ovariectomy OR >12 mo since LMP with no prior hysterectomy)	16	No	N0 (i-)	Stage IIA		TRUE	B35FBE19-0E6D-427E-B9BE-EE3527B5FCA6	5FCE29D3-4250-4696-B691-D4BC953C21CD	LIVING	0.76	C70325C1-54EB-41BF-B77C-D92FADA8D23E	Alive	FEMALE	TUMOR FREE	NA	0	10	No	WHITE	Primary Tumor
TCGA-E9-A3HO-01	TCGA-E9-A3HO		7th	T2	M0	-18046		0.402	19	245	NA	49		26.1	DiseaseFree	Negative	NOT HISPANIC OR LATINO	Cytology (e.g. Peritoneal or pleural fluid)		2012-02-20	C50.9	YES	158	C50.9	8520/3	NO	0	YES	Pre (<6 months since LMP AND no prior bilateral ovariectomy AND not on estrogen replacement)	58	No	N0 (i-)	Stage IIA		TRUE	807B62ED-D3F7-4211-83BE-754386FF2C96	4949D427-3B3C-408D-8035-C884BB41E41C	LIVING	26.1	3EFA8B1E-0FDB-49A4-95FC-4C9C9B15B61A	Alive	FEMALE	TUMOR FREE	NA	0	10	No	WHITE	Primary Tumor
TCGA-E9-A3Q9-01	TCGA-E9-A3Q9		7th	T3	M0	-28715		0.0275	31	198	NA	78		18.4	DiseaseFree	Negative	NOT HISPANIC OR LATINO	Tumor resection		2012-04-30	C50.9	YES	580	C50.9	8520/3	NO	0	YES	Post (prior bilateral ovariectomy OR >12 mo since LMP with no prior hysterectomy)	40	No	N3	Stage IIIC		TRUE	E36E985D-2C44-4E14-854A-7DBCA4BB0304	5D1CB65A-7798-455D-8100-25871CEC5A47	LIVING	18.4	FE3E1376-1527-42C0-8F5F-8849D0F2743B	Alive	FEMALE	TUMOR FREE	0	22	22	No	WHITE	Primary Tumor
TCGA-E9-A3X8-01	TCGA-E9-A3X8		7th	T2	M0	-17588		0.0767	23	233	NA	48		15.7	DiseaseFree	Negative	NOT HISPANIC OR LATINO	Tumor resection		2012-08-24	C50.9	YES	260	C50.9	8520/3	NO	0	YES	Post (prior bilateral ovariectomy OR >12 mo since LMP with no prior hysterectomy)	15	No	N1	Stage IIB		TRUE	95873E61-AFDB-496C-9F77-3F9BEB008CDA	C9E12D18-6092-499F-92AE-6FD6B16F2ACD	LIVING	15.7	00058FFD-35E6-4891-8B01-DAB3AE9EBF78	Alive	FEMALE	TUMOR FREE	0	4	8	No	WHITE	Primary Tumor
TCGA-EW-A1IW-01	TCGA-EW-A1IW		7th	T2	MX	-29529		0.176	252	213	NA	80		12.2	DiseaseFree	Negative	HISPANIC OR LATINO	Core needle biopsy		2011-05-27	C50.9	YES	90	C50.9	8520/3	NO	0	YES	Post (prior bilateral ovariectomy OR >12 mo since LMP with no prior hysterectomy)	73	No	N1a	Stage IIB		TRUE	5e2cbc56-97f9-4b94-ade2-a3f739bcc7be	bfd30c90-9b30-4e7b-96f5-1f1b2ce23f04	LIVING	12.2	D4194F52-3E15-4105-9A1A-1326CF128BF8	Alive	FEMALE	TUMOR FREE	0	2	10	No	WHITE	Primary Tumor
TCGA-EW-A1IX-01	TCGA-EW-A1IX		6th	T1b	MX	-17597		0.0676	1082	1030	NA	48		39.7	DiseaseFree	Negative	HISPANIC OR LATINO	Core needle biopsy		2011-06-10	C50.9	YES	130	C50.2	8524/3	NO	0	YES	Peri (6-12 months since last menstrual period)	25	No	N1a	Stage IIA		TRUE	e8614b7d-132e-4b4e-b1ae-df8bb4f2d4d4	142d082f-444c-4384-97c0-bbc78e228470	LIVING	39.7	3CF4FC36-70EF-4EA3-874C-4A514FCDB717	Alive	FEMALE	TUMOR FREE	1	1	27	No	ASIAN	Primary Tumor
TCGA-EW-A1IY-01	TCGA-EW-A1IY		6th	T1c	MX	-14122		0.0644	258	590	NA	38		8.48	DiseaseFree	Negative	NOT HISPANIC OR LATINO	Core needle biopsy		2011-05-10	C50.9	YES	50	C50.9	8500/3	NO	0	YES	Pre (<6 months since LMP AND no prior bilateral ovariectomy AND not on estrogen replacement)	30	No	N0	Stage I		TRUE	5ff12cbe-a3e0-4ce6-8452-12b984a1baaf	d728c743-10a6-4ac4-8725-61c0d2980057	LIVING	8.48	7C003A4F-DC30-43D0-AC61-ACE6BA118BEE	Alive	FEMALE	TUMOR FREE	0	0	6	No	ASIAN	Primary Tumor
TCGA-EW-A1J1-01	TCGA-EW-A1J1		7th	T2	M0	-14122		0.279	282	214	NA	38		18.9	DiseaseFree	Negative	HISPANIC OR LATINO	Core needle biopsy		2011-05-11	C50.9	YES	170	C50.9	8500/3	NO	0	YES	Pre (<6 months since LMP AND no prior bilateral ovariectomy AND not on estrogen replacement)	16	No	N1a	Stage IIB		TRUE	ed6cef77-1bd9-4e3b-b576-550a91e4253a	af9f631b-2857-48e2-8d77-34f66c1c6149	LIVING	18.9	E8B860F6-F3FD-4FDF-B467-8988646C2F00	Alive	FEMALE	TUMOR FREE	0	1	17	No	WHITE	Primary Tumor
TCGA-EW-A1J2-01	TCGA-EW-A1J2		7th	T1c	MX	-18558		0.138	140	51	NA	50		13.2	DiseaseFree	Negative	NOT HISPANIC OR LATINO	Core needle biopsy		2011-05-27	C50.9	YES	110	C50.5	8520/3	NO	0	YES	Pre (<6 months since LMP AND no prior bilateral ovariectomy AND not on estrogen replacement)	27	No	N1mi	Stage IIB		TRUE	a381275f-8858-4793-a8a2-0ca9db7274c8	2556d93d-9252-4248-a044-91deaa7f02df	LIVING	13.2	0046FACA-9E90-4BA9-B216-258A2A7A2EC6	Alive	FEMALE	TUMOR FREE	1	1	21	No	BLACK OR AFRICAN AMERICAN	Primary Tumor
TCGA-EW-A1J3-01	TCGA-EW-A1J3		7th	T1c	M0	-22332		0.182	252	155	NA	61		16.6	DiseaseFree	Negative	HISPANIC OR LATINO	Core needle biopsy		2011-05-18	C50.9	YES	80	C50.5	8520/3	NO	0	YES	Post (prior bilateral ovariectomy OR >12 mo since LMP with no prior hysterectomy)	26	No	N0	Stage IA		TRUE	bb1de798-0c02-437e-b539-33cb556d3993	3e2102ac-0d18-4cf5-8617-863245e21b3f	LIVING	16.6	79C0D757-50BE-4375-AF69-E577629EE0CA	Alive	FEMALE	TUMOR FREE	0	0	3	No	WHITE	Primary Tumor
TCGA-EW-A1J5-01	TCGA-EW-A1J5		7th	T3	M0	-21559		0.178	227	123	NA	59		15.7	DiseaseFree	Negative	NOT HISPANIC OR LATINO	Core needle biopsy		2011-06-10	C50.9	YES	180	C50.9	8500/3	NO	0	YES	Post (prior bilateral ovariectomy OR >12 mo since LMP with no prior hysterectomy)	333	No	N0 (i-)	Stage IIB		TRUE	5d8ed961-a012-4b6b-bffb-9468d3953646	bf42e8ce-cd3e-46c8-92f9-ea5cda443a6f	LIVING	15.7	D92CABBE-8D7E-41E5-B702-9ED07E94E5C4	Alive	FEMALE	TUMOR FREE	0	0	1	No	WHITE	Primary Tumor
TCGA-EW-A1J6-01	TCGA-EW-A1J6		6th	T1c	M0	-25830		0.902	595	528	NA	70		28.8	DiseaseFree	Negative	HISPANIC OR LATINO	Core needle biopsy		2011-05-11	C50.9	YES	80	C50.9	8500/3	NO	0	YES	Post (prior bilateral ovariectomy OR >12 mo since LMP with no prior hysterectomy)	30	No	N0 (i-)	Stage I		TRUE	87281a89-91d2-44f7-9f80-668567ad5c72	1e20ead6-a07f-4f0d-962a-a3a240722fb6	LIVING	28.8	F282122D-C129-4A8B-9A49-78D5267C37CA	Alive	FEMALE	TUMOR FREE	0	0	3	No	WHITE	Primary Tumor
TCGA-EW-A1OV-01	TCGA-EW-A1OV		6th	T2	MX	-20764		0.388	523	469	NA	56		25.9	DiseaseFree	Close	HISPANIC OR LATINO	Core needle biopsy		2011-05-27	C50.9	YES	130	C50.9	8500/3	NO	0	YES	Post (prior bilateral ovariectomy OR >12 mo since LMP with no prior hysterectomy)	82	No	N1mi	Stage IIB		TRUE	ac68d219-5670-4ddd-8df6-8aa7ad59e5c7	684196da-0213-497f-b239-7b5e76b01d0e	LIVING	25.9	88E39E13-8ADC-481A-992E-610B3BEBCBD4	Alive	FEMALE	TUMOR FREE	1	0	6	No	WHITE	Primary Tumor
TCGA-EW-A1OW-01	TCGA-EW-A1OW		6th	T2	MX	-21465		0.464	464	444	NA	58		22.8	DiseaseFree	Negative	NOT HISPANIC OR LATINO	Core needle biopsy		2011-05-18	C50.9	YES	100	C50.9	8090/3	NO	0	YES	Post (prior bilateral ovariectomy OR >12 mo since LMP with no prior hysterectomy)	NA	No	N0	Stage IIA		TRUE	f55dd73d-8c36-440b-84e5-9aae53107775	9f55d963-2c1d-4886-980e-edff099babf5	LIVING	22.8	2153CBCE-6DA9-4E0F-9F41-B9F08FD50647	Alive	FEMALE	TUMOR FREE	0	0	3	No	BLACK OR AFRICAN AMERICAN	Primary Tumor
TCGA-EW-A1OX-01	TCGA-EW-A1OX		6th	T2	MX	-15837		0.0924	562	550	NA	43		29.9	DiseaseFree	Negative	HISPANIC OR LATINO	Core needle biopsy		2011-05-18	C50.9	YES	140	C50.9	8523/3	NO	0	YES	Pre (<6 months since LMP AND no prior bilateral ovariectomy AND not on estrogen replacement)	17	No	N0	Stage IIA		TRUE	5fc7ff35-d3f7-4687-8759-3542bd58e988	8ba7248f-69cd-4b16-8900-ad2feec2eab8	LIVING	29.9	4C40B309-3178-4E7E-A987-47698E5E364B	Alive	FEMALE	TUMOR FREE	0	0	4	No	WHITE	Primary Tumor
TCGA-EW-A1OY-01	TCGA-EW-A1OY		6th	T2	MX	-23266		0.593	593	526	NA	63		29.8	DiseaseFree	Negative	HISPANIC OR LATINO	Core needle biopsy		2011-06-10	C50.9	YES	100	C50.9	8500/3	NO	0	YES	Post (prior bilateral ovariectomy OR >12 mo since LMP with no prior hysterectomy)	57	No	N0	Stage IIA		TRUE	53ff5893-7d5e-4bcb-be9c-665fa34b7824	22ebe36e-3c42-4ca0-a624-c4219074bab9	LIVING	29.8	76358109-41A0-4D5C-8894-F6A63A925961	Alive	FEMALE	TUMOR FREE	0	0	1	No	WHITE	Primary Tumor
TCGA-EW-A1OZ-01	TCGA-EW-A1OZ		6th	T2	M0	-20664		0.626	941	928	NA	56		40.4	DiseaseFree	Negative	NOT HISPANIC OR LATINO	Core needle biopsy		2011-05-11	C50.9	YES	210	C50.9	8500/3	NO	0	YES	Post (prior bilateral ovariectomy OR >12 mo since LMP with no prior hysterectomy)	49	No	N0 (i-)	Stage IIA		TRUE	8f912a40-3251-4e1f-ae65-1f93d71f9881	ac0612f6-3d84-44d5-a224-6cbe65531505	LIVING	40.4	42DE8E2C-395D-4E9B-B7BC-6A0B2F9BD7CE	Alive	FEMALE	TUMOR FREE	0	0	4	No	BLACK OR AFRICAN AMERICAN	Primary Tumor
TCGA-EW-A1P0-01	TCGA-EW-A1P0		6th	T2	MX	-20107		0.244	1121	1142	NA	55		35.9	Recurred/Progressed	Negative	NOT HISPANIC OR LATINO	Core needle biopsy		2011-05-10	C50.9	YES	190	C50.9	8523/3	NO	0	YES	Post (prior bilateral ovariectomy OR >12 mo since LMP with no prior hysterectomy)	21	No	N1b	Stage IIB		TRUE	81e32f39-3aa0-468b-87ed-dd2eb6165ddf	f2b7091e-ed85-4546-8f11-307154153d31	LIVING	41.1	F9FB00C3-9F86-40AC-A5E8-08712CD5002B	Alive	FEMALE	WITH TUMOR	NA	1	21	No	WHITE	Primary Tumor
TCGA-EW-A1P3-01	TCGA-EW-A1P3		6th	T2	MX	-17637		0.24	987	919	NA	48		52.9	DiseaseFree	Negative	NOT HISPANIC OR LATINO	Core needle biopsy		2011-06-10	C50.9	YES	150	C50.9	8500/3	NO	0	YES	Pre (<6 months since LMP AND no prior bilateral ovariectomy AND not on estrogen replacement)	19	No	N0	Stage IIA		TRUE	1ff85ada-3cdd-4afb-b311-2c7befb52702	bbe1e6e5-7c52-44aa-940e-104f07751e11	LIVING	52.9	042304AE-706A-4033-A97F-3765A6AEC649	Alive	FEMALE	TUMOR FREE	0	0	4	Yes	WHITE	Primary Tumor
TCGA-EW-A1P4-01	TCGA-EW-A1P4		6th	T2	M0	-15989		0.47	501	525	NA	43		29.8	DiseaseFree	Negative	HISPANIC OR LATINO	Core needle biopsy		2011-05-11	C50.9	YES	290	C50.9	8510/3	NO	0	YES	Pre (<6 months since LMP AND no prior bilateral ovariectomy AND not on estrogen replacement)	59	No	N0 (i-)	Stage IIA		TRUE	521e2140-ae5b-456f-8699-97398d009687	7a3b5790-35c8-473a-b952-bb603aca5aa1	LIVING	29.8	70C8D54A-9698-4275-BD96-A6EF2E26474B	Alive	FEMALE	TUMOR FREE	0	0	3	No	WHITE	Primary Tumor
TCGA-EW-A1P5-01	TCGA-EW-A1P5		7th	T2	M0	-28177		0.256	365	325	NA	77		23.1	DiseaseFree	Negative	NOT HISPANIC OR LATINO	Core needle biopsy		2011-05-11	C50.9	YES	110	C50.9	8500/3	NO	0	YES	Post (prior bilateral ovariectomy OR >12 mo since LMP with no prior hysterectomy)	15	No	N1a	Stage IIB		TRUE	53d0af48-d7ea-42c9-8695-c614b89b415b	c5eb7bf2-fc4a-497e-ace9-c715fea47e5b	LIVING	23.1	82771A56-81CA-4414-949F-EFBCAE1C98D4	Alive	FEMALE	TUMOR FREE	0	3	40	No	WHITE	Primary Tumor
TCGA-EW-A1P6-01	TCGA-EW-A1P6		7th	T2	M0	-23485		0.0919	312	249	NA	64		18.5	DiseaseFree	Close	HISPANIC OR LATINO	Core needle biopsy		2011-05-19	C50.9	YES	50	C50.9	8500/3	NO	0	YES	Post (prior bilateral ovariectomy OR >12 mo since LMP with no prior hysterectomy)	22	No	N1a	Stage IIB		TRUE	ee5744c0-a8dc-43f2-abdd-0b5529a3e9fb	174435cc-64d1-4d33-953c-1ada5df46ecd	LIVING	18.5	6FEAD496-58BA-42DC-A3F2-2F380EEB1588	Alive	FEMALE	TUMOR FREE	0	2	25	No	WHITE	Primary Tumor
TCGA-EW-A1P7-01	TCGA-EW-A1P7		6th	T2	M0	-21750		0.002688	635	604	NA	59		23.9	Recurred/Progressed	Negative	HISPANIC OR LATINO	Core needle biopsy		2011-05-18	C50.9	YES	210	C50.9	8500/3	NO	0	YES	Post (prior bilateral ovariectomy OR >12 mo since LMP with no prior hysterectomy)	30	No	N0 (i-)	Stage IIA		TRUE	01674b2c-5cf2-478f-84a1-f69c39f47bd4	3d164bd9-7416-47af-a102-29954e3efe2c	LIVING	30.1	8F35E936-E4DD-4E35-BD9B-6CB7974E2765	Alive	FEMALE	TUMOR FREE	0	0	2	No	WHITE	Primary Tumor
TCGA-EW-A1P8-01	TCGA-EW-A1P8		7th	T2	M0	-21501		0.946	NA	224	239	58		6.8	Recurred/Progressed	Negative	NOT HISPANIC OR LATINO	Fine needle aspiration biopsy		2011-05-27	C50.9	YES	160	C50.9	8500/3	NO	0	YES	Post (prior bilateral ovariectomy OR >12 mo since LMP with no prior hysterectomy)	32	No	N3b	Stage IIIC		TRUE	359f12f9-5c41-48a4-85bc-fd7e307bf7d8	bf055644-7bca-43b6-8f5a-e21c42f7cf88	DECEASED	7.85	6CB5A0ED-5569-4FDC-B651-758BFC6B59D8	Dead	FEMALE	WITH TUMOR	NA	14	15	No	WHITE	Primary Tumor
TCGA-EW-A1PA-01	TCGA-EW-A1PA		7th	T2	M0	-21837		0.303	267	220	NA	59		18.9	DiseaseFree	Negative	HISPANIC OR LATINO	Core needle biopsy		2011-05-11	C50.9	YES	60	C50.9	8500/3	NO	0	YES	Post (prior bilateral ovariectomy OR >12 mo since LMP with no prior hysterectomy)	27	No	N1a	Stage IIB		TRUE	4cfef7f9-f1ee-401c-a2a3-c225d4adc3b6	50c357b1-a9fc-44e4-9a7b-937e6d74e081	LIVING	18.9	A68B2364-89DA-4DC7-9AA7-A08BBCC85025	Alive	FEMALE	TUMOR FREE	NA	1	13	No	WHITE	Primary Tumor
TCGA-EW-A1PB-01	TCGA-EW-A1PB		6th	T3	MX	-25770		0.158	608	569	NA	70		20	DiseaseFree	Negative	NOT HISPANIC OR LATINO	Core needle biopsy		2011-05-18	C50.9	YES	320	C50.9	8500/3	NO	0	YES	Post (prior bilateral ovariectomy OR >12 mo since LMP with no prior hysterectomy)	119	No	N1a	Stage IIIA		TRUE	88db1340-e4bf-451a-87c0-6e9168296f5e	da9dc40b-0350-4b8c-8a7a-15100d5aeb90	LIVING	20	B3B6DE56-F40C-40BF-B6B3-2BC10F695F16	Alive	FEMALE	TUMOR FREE	NA	2	8	No	BLACK OR AFRICAN AMERICAN	Primary Tumor
TCGA-EW-A1PC-01	TCGA-EW-A1PC		7th	T3	MX	-24434		0.59	187	146	NA	66		6.14	DiseaseFree	Negative	NOT HISPANIC OR LATINO	Core needle biopsy		2011-09-28	C50.9	YES	150	C50.9	8500/3	NO	0	YES	Post (prior bilateral ovariectomy OR >12 mo since LMP with no prior hysterectomy)	99	No	N0 (i-)	Stage IIB		TRUE	F45210D3-9E66-4F5E-BEF1-5EE5547CC893	FB635F1D-5EE1-4E58-86EA-B1AADA2DE4BA	LIVING	6.14	C17793D4-FFC9-4FC2-8071-FCFD49575A18	Alive	FEMALE	TUMOR FREE	0	0	2	No	BLACK OR AFRICAN AMERICAN	Primary Tumor
TCGA-EW-A1PD-01	TCGA-EW-A1PD		7th	T1c	M0	-22536		0.333	175	112	NA	61		13.9	DiseaseFree	Negative	HISPANIC OR LATINO	Core needle biopsy		2011-05-18	C50.9	YES	120	C50.9	8500/3	NO	0	YES		63	No	N1a	Stage IIA		TRUE	4dfc233b-ed03-4825-8089-e04cdee99996	9f52ae8b-7fe7-441c-9fb6-c55a9bd1a0d0	LIVING	13.9	B6D80CA9-F4DA-4DFB-80BF-08BEE17142BD	Alive	MALE	TUMOR FREE	NA	2	7	No	WHITE	Primary Tumor
TCGA-EW-A1PE-01	TCGA-EW-A1PE		7th	T1c	M0	-20694		0.176	107	44	NA	56		10.5	DiseaseFree	Negative	HISPANIC OR LATINO	Core needle biopsy		2011-05-27	C50.9	YES	150	C50.9	8507/3	NO	0	YES	Post (prior bilateral ovariectomy OR >12 mo since LMP with no prior hysterectomy)	28	No	N1a	Stage IIA		TRUE	f3b86c02-09a5-4e97-aa7a-86f13f7cda4b	0bc7a0cb-2a16-4f63-8188-39fd4c20b8b3	LIVING	10.5	F59530A5-7370-4E77-9099-9F38B25A38EB	Alive	FEMALE	TUMOR FREE	NA	1	23	No	WHITE	Primary Tumor
TCGA-EW-A1PF-01	TCGA-EW-A1PF		7th	T1c	M0	-18384		0.225	140	84	NA	50		14.4	DiseaseFree	Negative	HISPANIC OR LATINO	Core needle biopsy		2011-05-27	C50.9	YES	60	C50.9	8500/3	NO	0	YES	Post (prior bilateral ovariectomy OR >12 mo since LMP with no prior hysterectomy)	NA	No	N0	Stage IA		TRUE	848773a3-2f4a-4186-ab3f-de667129accf	b8e11365-4360-4db7-bfe8-a8da3ca4819b	LIVING	14.4	0D24479F-2F86-43AC-AAB1-83AAD99542C4	Alive	FEMALE	TUMOR FREE	0	0	11	No	WHITE	Primary Tumor
TCGA-EW-A1PG-01	TCGA-EW-A1PG		6th	T2	MX	-19464		0.0003686	876	829	NA	53		34.5	DiseaseFree	Negative	HISPANIC OR LATINO	Core needle biopsy		2011-05-18	C50.9	YES	210	C50.9	8520/3	NO	0	YES	Post (prior bilateral ovariectomy OR >12 mo since LMP with no prior hysterectomy)	8	No	N1a	Stage IIB		TRUE	da286247-e8bb-4941-a2af-2453fe61cd02	e216aa55-98fc-4d0d-a24e-cfa05778f973	LIVING	34.5	6197798C-6F04-470E-BA91-922548E2DFAF	Alive	FEMALE	TUMOR FREE	1	1	25	No	WHITE	Primary Tumor
TCGA-EW-A1PH-01	TCGA-EW-A1PH		7th	T1c	M0	-19073		0.466	140	77	NA	52		19.9	DiseaseFree	Negative	HISPANIC OR LATINO	Core needle biopsy		2011-05-27	C50.9	YES	70	C50.9	8500/3	NO	0	YES	Post (prior bilateral ovariectomy OR >12 mo since LMP with no prior hysterectomy)	45	No	N1a	Stage IIA		TRUE	4da999a0-ef41-4a0b-b1d1-446b39cc855a	dd38ba60-656a-46f7-b22b-bcee3b6d2f19	LIVING	19.9	2E77693B-FAAD-4CCC-BD4F-3D2470C25143	Alive	FEMALE	TUMOR FREE	0	1	10	No	WHITE	Primary Tumor
TCGA-EW-A2FR-01	TCGA-EW-A2FR		6th	T1b	MX	-21628		0.0742	1120	1015	NA	59		55	DiseaseFree	Negative	NOT HISPANIC OR LATINO	Core needle biopsy		2011-10-12	C50.9	YES	100	C50.9	8500/3	NO	0	YES	Post (prior bilateral ovariectomy OR >12 mo since LMP with no prior hysterectomy)	45	No	N3a	Stage IIIC		TRUE	AF97E043-88CB-4F99-8F8B-9BCBCCCDF842	061F9BB8-09F5-4788-B39D-35138A3AA019	LIVING	55	792A24F5-065E-4001-97F6-3F9BA121C65D	Alive	FEMALE	TUMOR FREE	NA	19	21	No	BLACK OR AFRICAN AMERICAN	Primary Tumor
TCGA-EW-A2FS-01	TCGA-EW-A2FS		6th	T2	MX	-15302		0.191	1173	1074	NA	41		52.7	DiseaseFree	Negative	NOT HISPANIC OR LATINO	Core needle biopsy		2011-10-12	C50.9	YES	110	C50.9	8500/3	NO	0	YES	Pre (<6 months since LMP AND no prior bilateral ovariectomy AND not on estrogen replacement)	28	No	N1mi	Stage IIB		TRUE	D34471A1-B367-4F8A-B35A-C5901C4F5503	D92B4202-25D2-40B1-A704-C6BCA0EB5BC3	LIVING	52.7	F273B11F-D3CE-4619-BEC2-15C110567503	Alive	FEMALE	TUMOR FREE	NA	1	8	No	BLACK OR AFRICAN AMERICAN	Primary Tumor
TCGA-EW-A2FV-01	TCGA-EW-A2FV		7th	T3	MX	-14316		0.151	239	133	NA	39		25.9	DiseaseFree	Negative	HISPANIC OR LATINO	Excisional Biopsy		2011-10-05	C50.9	YES	80	C50.9	8507/3	NO	0	NO	Pre (<6 months since LMP AND no prior bilateral ovariectomy AND not on estrogen replacement)	20	No	N3a	Stage IIIC		TRUE	F45AA0B2-F3DE-4DB5-9730-E5C6C4E2ED3A	DE8AE7A3-D96B-4B54-9373-8E63F3AC926B	LIVING	25.9	335BFEB5-6356-43A3-896D-50BF3830B59E	Alive	FEMALE	TUMOR FREE	NA	29	32	No	WHITE	Primary Tumor
TCGA-EW-A2FW-01	TCGA-EW-A2FW		7th	T2	MX	-19085		0.212	191	99	NA	52		22.1	DiseaseFree	Negative	HISPANIC OR LATINO	Core needle biopsy		2011-10-05	C50.9	YES	150	C50.9	8503/3	NO	0	YES	Post (prior bilateral ovariectomy OR >12 mo since LMP with no prior hysterectomy)	19	No	N0 (i-)	Stage IIA		TRUE	E6F527A2-38EB-457E-BB39-3C5B9C0BCBEC	7E728799-4C12-451A-AFA9-0B26996F5736	LIVING	22.1	0487E2B3-C03F-43A0-ABCB-B2BDBE0FF47E	Alive	FEMALE	TUMOR FREE	0	0	6	No	WHITE	Primary Tumor
TCGA-EW-A3E8-01	TCGA-EW-A3E8	YES	7th	T3	MX	-21922		0.0997	647	505	NA	60	YES	21.3	DiseaseFree	Negative	HISPANIC OR LATINO	Core needle biopsy		2013-02-08	C50.9	YES	50	C50.9	8520/3	NO	0	YES	[Not Evaluated]	81	No	N0	Stage IIB	NO	TRUE	C0B7B798-3383-4A45-A455-9ECA5810739E	A896CC6D-91D8-4C63-B9C6-2B049E88B8B3	LIVING	21.3	D901F59A-A98A-4D15-85D4-0E9DCA746A03	Alive	FEMALE	TUMOR FREE	NA	0	2	No	WHITE	Primary Tumor
TCGA-EW-A3U0-01	TCGA-EW-A3U0		7th	T3	M0	-22520		0.468	229	182	NA	61		17.5	DiseaseFree	Negative	NOT HISPANIC OR LATINO	Core needle biopsy		2012-05-24	C50.9	YES	280	C50.9	8500/3	NO	0	YES	Post (prior bilateral ovariectomy OR >12 mo since LMP with no prior hysterectomy)	113	No	N1a	Stage IIIA		TRUE	D9DC3B59-613D-469E-8B4F-6C5A557EB26A	549F03A5-3F91-4975-9EEB-AA062264A602	LIVING	17.5	8652E026-9C4D-4AB6-AADE-29DA3345892E	Alive	FEMALE	TUMOR FREE	NA	1	25	No	BLACK OR AFRICAN AMERICAN	Primary Tumor
TCGA-EW-A423-01	TCGA-EW-A423	YES	7th	T2	MX	-27627		0.694	309	161	NA	75	YES	10.2	DiseaseFree	Negative	HISPANIC OR LATINO	Core needle biopsy		2013-01-04	C50.9	YES	80	C50.9	8520/3	NO	0	YES	Post (prior bilateral ovariectomy OR >12 mo since LMP with no prior hysterectomy)	43	No	N0	Stage IIA	NO	TRUE	BDD08EC8-8892-4273-8F21-6FDE0F23C52D	4B4DDC10-5B37-42D2-BBF8-B0CAC95AE1B3	LIVING	10.2	0BB6CAC8-CE26-461F-A9FE-46E28E96A368	Alive	FEMALE	TUMOR FREE	0	0	2	No	WHITE	Primary Tumor
TCGA-GI-A2C8-01	TCGA-GI-A2C8		6th	T4b	MX	-23103		0.558	225	2429	NA	63		7.39	DiseaseFree	Negative	NOT HISPANIC OR LATINO			2011-10-21	C50.9	YES	100	C50.9	8500/3	NO	0	YES		91	Yes	N0	Stage IIIB		FALSE	33fe5833-d7a0-43d7-a03d-56985ea448a6	4a21e922-a294-43f0-89cb-862dabed4f8c	LIVING	7.39	4AABCBD1-DF12-45E1-9307-21D6CB0894A9	Alive	FEMALE		NA	0	10	No	WHITE	Primary Tumor
TCGA-GI-A2C9-01	TCGA-GI-A2C9		6th	T3	MX	-21534		0.564	711	2979	NA	58		110	DiseaseFree	Negative	NOT HISPANIC OR LATINO	Core needle biopsy		2011-10-21	C50.9	YES	120	C50.9	8500/3	NO	0	YES	Post (prior bilateral ovariectomy OR >12 mo since LMP with no prior hysterectomy)	112	No	N0	Stage IIB		FALSE	9F6BE944-83DE-42AB-8738-F0022F475E61	143FC27D-E119-48FF-A5EA-BD6AAFC0404E	LIVING	110	ADDE6090-5278-42D5-8E89-E0AB630A4C06	Alive	FEMALE	TUMOR FREE	0	0	4	No	BLACK OR AFRICAN AMERICAN	Primary Tumor
TCGA-GM-A2D9-01	TCGA-GM-A2D9		6th	T1c	M0	-25490		0.154	NA	1910	1812	69		NA		Negative	NOT HISPANIC OR LATINO	Core needle biopsy		2011-09-28	C50.9	YES	130	C50.9	8500/3	NO	0	YES	Post (prior bilateral ovariectomy OR >12 mo since LMP with no prior hysterectomy)	345	No	N0 (i-)	Stage I		FALSE	1133B8A9-6B11-4511-B70A-F200E3B8B5DB	07C938AD-70F7-418F-B6C9-EC6E4B1DAE66	DECEASED	59.5	C690925E-38A2-48BC-8E2B-4EA383E27FE2	Dead	FEMALE	WITH TUMOR	0	0	2	No	WHITE	Primary Tumor
TCGA-GM-A2DA-01	TCGA-GM-A2DA		4th	T2	M0	-16854		0.141	5909	6583	NA	46		194	DiseaseFree	Negative	NOT HISPANIC OR LATINO	Fine needle aspiration biopsy		2011-09-28	C50.9	YES	50	C50.9	8500/3	NO	0	YES	Post (prior bilateral ovariectomy OR >12 mo since LMP with no prior hysterectomy)	24	No	N1b	Stage IIB		FALSE	C07B122E-AC50-4DB2-ADD2-5617A5D0E976	ED47A919-BE85-4D06-AEE3-87B6485498CC	LIVING	194	F3CD8E6E-B02F-4D5D-B895-6DF063F61603	Alive	FEMALE	WITH TUMOR	0	2	13	No	WHITE	Primary Tumor
TCGA-GM-A2DB-01	TCGA-GM-A2DB		6th	T2	M0	-22883		0.229	1616	1644	NA	62		53.1	DiseaseFree	Negative	NOT HISPANIC OR LATINO	Core needle biopsy		2011-09-28	C50.9	YES	190	C50.9	8500/3	NO	0	YES	Post (prior bilateral ovariectomy OR >12 mo since LMP with no prior hysterectomy)	101	No	N0 (i-)	Stage IIA		FALSE	6E6B7742-A562-490B-BB72-04A5653852E4	57557C6C-4927-449B-976E-127C0916763B	LIVING	53.1	5A315635-886B-459E-AF5D-079F66E859F0	Alive	FEMALE	TUMOR FREE	0	0	3	No	WHITE	Primary Tumor
TCGA-GM-A2DC-01	TCGA-GM-A2DC		6th	T1c	M0	-21122		0.413	1628	1820	NA	57		53.5	DiseaseFree	Negative	NOT HISPANIC OR LATINO	Core needle biopsy		2011-09-29	C50.9	YES	110	C50.9	8500/3	NO	0	YES	Post (prior bilateral ovariectomy OR >12 mo since LMP with no prior hysterectomy)	17	No	N1a	Stage IIA		FALSE	DD43FFD9-DA18-4AD3-ABE7-6F443C76A717	25DE243D-F03E-496B-B5F0-3DD8E61303FE	LIVING	53.5	48CB011B-074A-424B-B2D2-E8A2397CF02E	Alive	FEMALE	TUMOR FREE	0	1	21	No	WHITE	Primary Tumor
[truncated: 18 more rows]
[truncated: 9 more columns]

## Sheet: sampleanns_metabric_samples
	METABRIC_ID	age_at_diagnosis	last_follow_up_status	menopausal_status_inferred	group	grade	size	stage	lymph_nodes_positive	lymph_nodes_removed	NPI	histological_type	ER_IHC_status	HER2_IHC_status	HER2_SNP6_state	cellularity	P53_mutation_status	P53_mutation_type	P53_mutation_details	Pam50Subtype	IntClustMemb	Treatment	Site	Genefu	ER.Expr	Her2.Expr	PR.Expr	ime to death
[truncated: 866 more rows]

[truncated: 1 more sheets: TCGA_IL1B_correlated_genes]
