# Supplementary material for: IL1 Receptor Antagonist Controls Transcriptional Signature of Inflammation in Patients with Metastatic Breast Cancer
Source: Oxford University Press journal article supplement (doi:10.1158/0008-5472.can-18-0413), 2018-07-16
Supplement: 00085472can180413-sup-196799_2_supp_4724481_p83tgt.docx [file 00085472can180413-sup-196799_2_supp_4724481_p83tgt.docx]

**Figure S1. Cytokines screening from breast tumor tissue. Related to Figure 1.**

(A) Levels of IL-1, IL-1, IL-1RA, IL-18, IL-33, GM-CSF and TSLP measured in supernatants of BC tumor fragments post PMA/ionomycin stimulation. Mean and median secretion of indicated cytokine is shown in pg/ml. *N,* Number of tested patient sample. (B) Supernatants of BC tumor fragments (T) or macroscopically non-involved surrounding tissue (ST) post PMA/ionomycin stimulation: IL-1, IL-1Ra, IL-18, IL-33, TSLP and GM-CSF. Paired samples from the same patient were analyzed side-by-side; mean and median secretion of indicated cytokine is shown in pg/ml. Non-parametric Wilcoxon test was used to determine significance of observed differences. (C) Levels of IL-18 and IL-33 were plotted respectively in contrast to the level of IL-13 from the same patient. Analyzed using nonparametric spearman correlation to determine the level of correlation between two cytokines. Nonparametric t test was used. (D) IL-1 concentrations plotted in relation to histopathological tumor stage. N=number of tissue samples from different patients with indicated disease stage; mean and median secretion of indicated cytokines in pg/ml. Welch’s t-test was used to compare cytokine production between different pathological stages of BC.


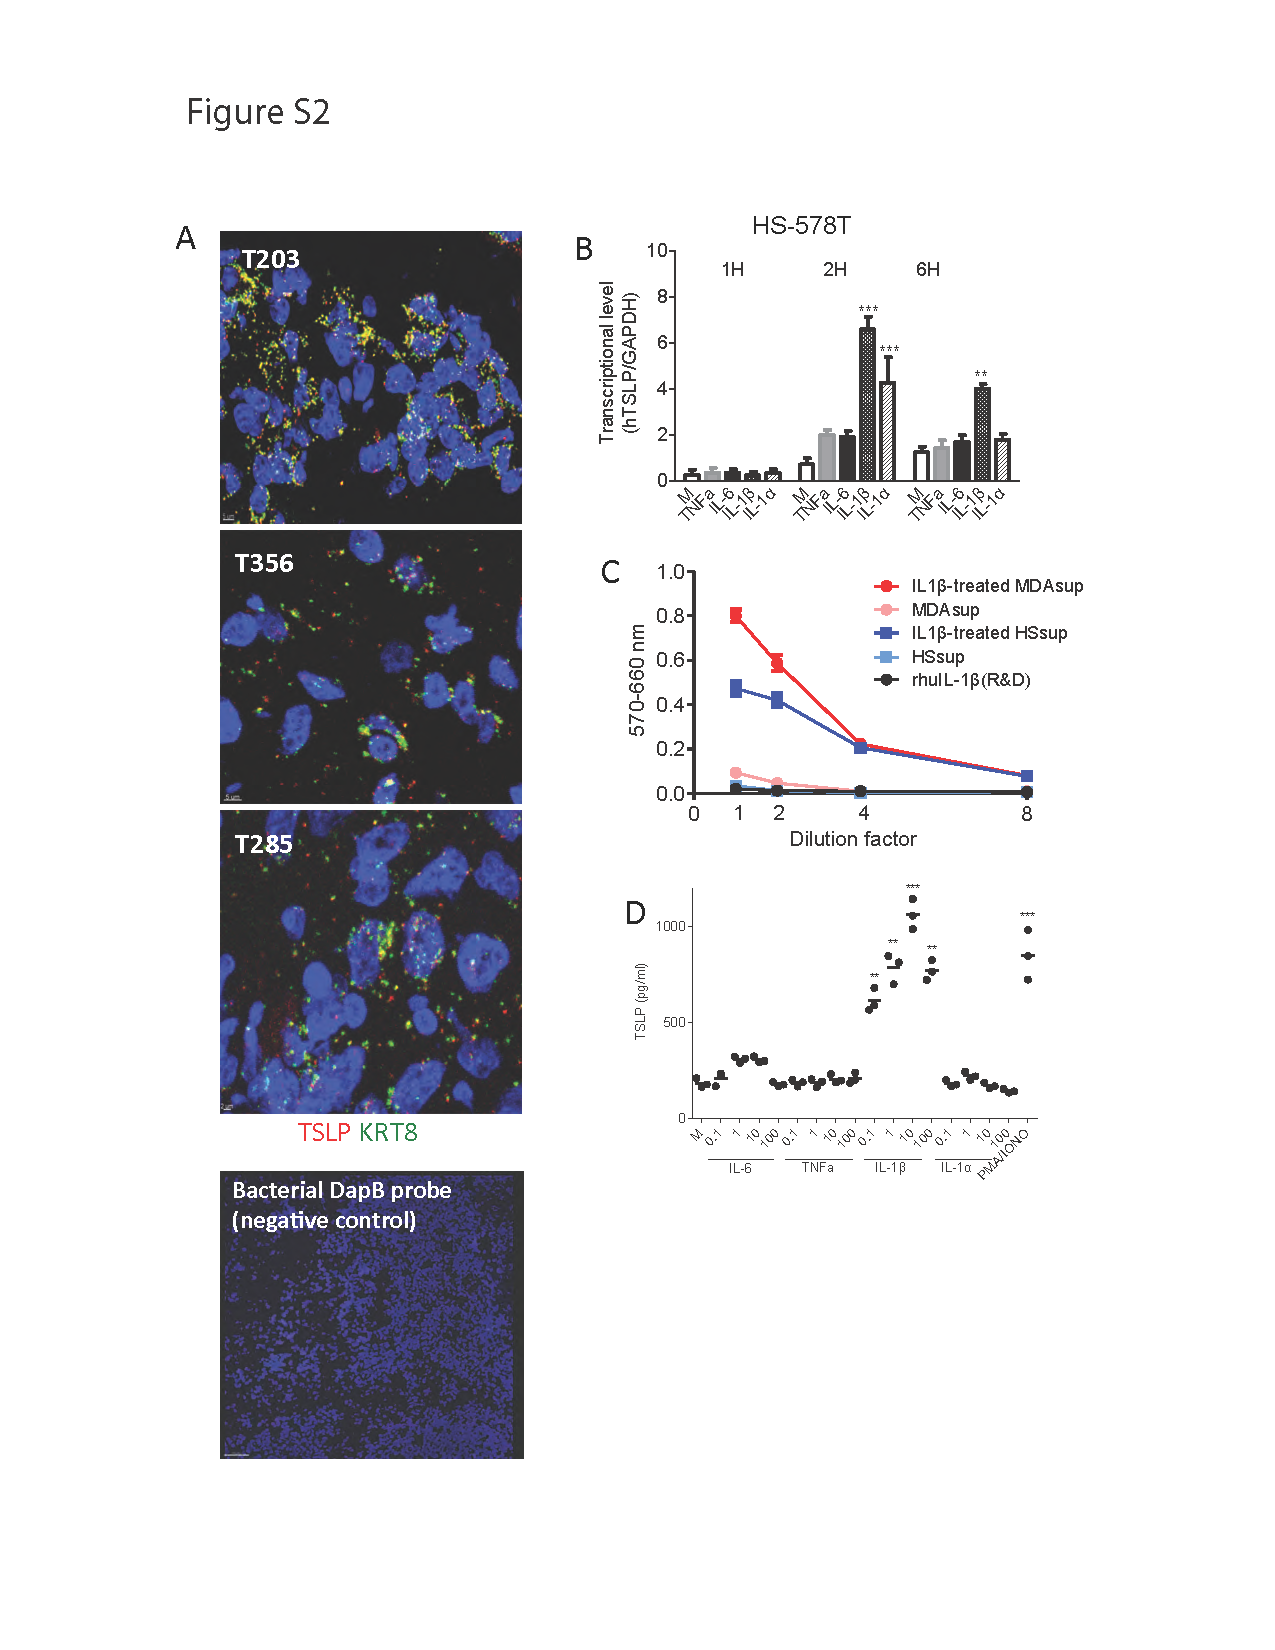


**Figure S2. IL-1β induces TSLP production from breast cancer cells. Related to Figure2.**

(A) RNA transcripts were visualized in OCT-embedded BC tumor sections using the QuantiGene ViewRNA ISH tissue assay kit. Human *KRT8* and human *TSLP* were visualized in green and red, respectively. Lower panel: Bacterial DapB probe as negative control. (B) Hs578T cells were treated with medium alone, 10 ng/ml of IL-1β, IL-1α, TNF-α, or IL-6 for the indicated time course individually. Cells were harvested and measured for TSLP mRNA level by quantitative real-time PCR. Values were normalized to internal control GAPDH. Bars show the mean±SEM for triplicate wells from a representative experiment. *** p<0.0001, **p<0.01, *p<0.05. (C) TSLPR+/IL-7Rα+ Baf3 cells were seeded in 96-well plate. Serial dilution was done to IL-1β-treated MDA-MB231 culture sups, IL-1β-treated Hs578T culture sups, tumor sups without IL-1β treatment, or IL-1β. The conditioned sups with different dilution were used to treat Baf3 cells. The proliferative values were measured based on MTT assay. (D) Luminex analysis of TSLP in supernatants of MDA-MB231 cells as indicated after 48h of culture in media (M) alone, or in the presence of different doses of IL-6 plus sIL6r, TNF-α, IL-1 β, or IL-1α, or PMA and ionomycin. Values are plotted as mean±SEM from triplicate experiments.

**Figure S3. IL-1 production in DCs is caspase-1 dependent. Related to Figure3.**

Representative images of MDA-MB231 cells and blood DCs co-cultured in chamber wells for 18 hours in the presence of caspase-1 inhibitor or DMSO. Cells were fixed in the well and stained for (A) pro-IL-1β (red), HLA-DR (green), and DAPI (blue). (B) mature IL-1β (red), HLA-DR (green), and DAPI (blue). Bar, 90um.

**Figure S4. IL-1β production requires TAK1-dependent caspase-1 activation. Related to Figure4.**

(A) MDA-MB231 cells were co-cultured with monocytes for 48 hours, in presence of different doses of TGF-βR kinase inhibitor or anti-TGF-β neutralizing antibody, DMSO, or isotype control respectively. IL-1β level was measured in the supernatants by Luminex. Values are plotted as mean±SEM. [independent t-test was used] (B) same conditions as in (A) but over a 16-hour culture period, and with the readout being fraction of total DCs being IL-1+. Intracellular staining of culture performed with anti-IL-1β antibody and quantified by flow cytometry. Each dot represents one experiment. (C) Histograms of *IL1B* transcription levels analyzed by quantitative RT-PCR. Values were normalized to GAPDH. Bars show the mean±SEM for triplicate wells from a representative experiment. Kruskall-Wallis test was used. *** p<0.0001, **p<0.01, *p<0.05. n.s., not significant. (D) Monocytes were treated with MDA-MB231 culture sups for 16 hours in presence of 200 nm TAK1 inhibitor or DMSO. Cells were harvested and activated caspase-1 and CD11c were stained. Right panel: Summary data of the percentage of activated caspase-1 in monocytes. (E) MDA-MB231 cells were co-cultured with mDCs for 48 hours in presence of TAK1 inhibitor or DMSO. Cells were harvested and IL-1β+ DCs were detected by flow cytometry.

**Figure S5. IL-1 and TGF- mediate tumor-promoting type 2 cytokines in humanized mouse model. Related to Figure5.**

Cell suspension was obtained from breast cancer tissue from mice described in Figure 5. Cell suspensions were obtained by digestion with 2.5 mg/ml of collagenase D, and 200 U/ml of DNAse I for 30 minutes at 37˚C. For intracellular cytokines, cells were stained using BD cytofix/cytoperm fixation/permeabilization kit according to the manufacturer directions. IL-13 and IFN-γ were stained from PBS (upper panel) and anakinra group (lower panel). Each graph indicated cells from each mouse.

**Figure S6. Cells component in blood from patients in clinical trial. Related to Figure6.**

Eleven pts with HER2negative MBC received nab paclitaxel (n=3), eribulin (n=5) or capecitabine (n=2) along with anakinra 100mg/daily (FDA-approved dose for adults with rheumatoid arthritis) (Kineret®, Amgen Inc.) daily following 2-week treatment with anakinra only. Blood was collected prior to anakinra treatment, then at 2 weeks, then monthly for 6 months (mos). B: patient baseline; RI: patient run-in (two weeks after anakinra only); EOM: end of month after anakinra plus chemotherapy. Blood was used for (A) complete blood count (CBC) and (B) flow cytometry. (A) CBC includes white blood cell count (WBC), neutrophils, lymphocytes, mean platelet volume (MPV), mean corpuscular volume (MCV), mean corpuscular hemoglobin concentration (MCHC), mean corpuscular hemoglobin (MCH) and platelet were shown in each row. The values were normalized to patients’ baseline. (B) CD19, CD3, CD4, CD8, mDC and pDC cell numbers were summarized in each row. Each dot represents a patient. (C) Heatmap of gene signatures between healthy control and sJIA patients.

**Figure S7. Anakinra signature clustered breast cancer patients in TCGA dataset. Related to Figure7.**

(A) *IL1B* transcript expression in different BC subtypes annotated in the TCGA database. N=number of samples per subtype. Kruskal-Wallis test was used to calculate the significance of observed differences (p<0.001). (B) The gene sets controlled by anakinra treatment in the blood were used in unsupervised analyses of transcriptional datasets from invasive BrCa tumors in the TCGA datasets. Two clusters were formed based on gene expression and assigned as red and black clusters. (C) TCGA data: *IL1B* transcription in two clusters.

**Table S1. Cytokines screening from breast tumor tissue.**

Levels of IL-1, IL-1, IL-1RA, IL-18, IL-33, IL-13, IL-4, GM-CSF, TSLP and IL-5 measured in supernatants of BrCa tumor fragments post PMA/ionomycin stimulation.

Non-parametric Spearman correlations were then generated (r) between levels of IL-1, IL-1 IL-1RA, IL-18, IL-33 with IL-13, IL-4 or IL-5 secreted from tumors obtained from the same patient.

Levels of IL-1, IL-13, TSLP and IFNg measured in supernatants of BrCa tumor fragments post PMA/ionomycin stimulation. Groups are assigned by the “pheatmap” algorithm.

**Table S2. Sample information of invasive breast carcinoma dataset in TCGA and METABRIC**

Normalized gene expression data from invasive breast carcinoma in the TCGA project was downloaded from the TCGA data portal. Genes with expression levels correlated with the expression of *IL1B*.  Test for association between paired samples were computed using Pearson's product moment correlation coefficient and Spearman's *rho*. The statistical significance of the coefficients are adjusted using the false discovery rate method (Benjamin & Hochberg).

**Table S3. Information from patients in clinical trial.**

Eleven metastatic BC patients were enrolled and received an initial 2-week run-in treatment with daily subcutaneous anakinra alone followed by continues daily anakinra and physician’s choice of chemotherapy. Blood was collected prior to anakinra treatment, then at 2 weeks, then monthly for 6 months (mos). 11 healthy controls were included. Clinical details were recorded includes sample ID, patient ID and day of anakinra. The whole blood was used for nanostring analysis, CBC and flow cytometry. Cell count and percentage of each compartment were recorded.

In clinical trial, blood was collected prior to anakinra treatment, then at 2 weeks, then monthly for 6 months (mos). B: patient baseline; RI: patient run-in (two weeks after anakinra only); EOM: end of month after anakinra plus chemotherapy. Blood was used for nanostring analysis. Evaluation the effects of anakinra on the blood transcriptome of patients over time, genes differentially expressed between any time point post treatment and patient baseline (B, p<0.05) were listed.

**Table S4. Key resource table**

**Table S5. Clinical outcome in clinical trial**

Clinical outcomes from patients with HER2negative MBC received nab paclitaxel (n=3), eribulin (n=5) or capecitabine (n=2) along with anakinra 100mg/daily following 2-week treatment with anakinra only. NE=not evaluable; ISR=injection site reaction; PD=progressive disease; SD=stable disease
