# Supplementary material for: IL1 Receptor Antagonist Controls Transcriptional Signature of Inflammation in Patients with Metastatic Breast Cancer
Source: Oxford University Press journal article supplement (doi:10.1158/0008-5472.can-18-0413), 2018-07-16
Supplement: 00085472can180413-sup-196799_2_supp_4727669_p82j1n.docx [file 00085472can180413-sup-196799_2_supp_4727669_p82j1n.docx]

**Table S4. Key resource table**

| REAGENT or RESOURCE | SOURCE | IDENTIFIER |
| --- | --- | --- |
| **Antibodies** | | |
| anti-rabbit IgG conjugated to Alexa Fluor 568 | Invitrogen | Cat# A10042 |
| anti-mouse IgG2b conjugated to Alexa Fluor 647 | Invitrogen | Cat# A21242 |
| goat anti-mouse IgG2a conjugated to Alexa Fluor 488 | invitrogen | Cat# A21131 |
| Anti-human IL-1β | Abcam | Clone Ab9722 |
| Anti-human cytokeratin-19 | Abcam | Clone A53-B/A2 |
| anti-TGF-β1 antibody (Chicken IgY) | R&D | Polyclonal Chicken IgY |
| Anti-TGF-β neutralizing antibody (1D11) | R&D | Clone 1D11 |
| TAK1 inhibitor | Sigma-Aldrich | 5z-7-oxozeaenol |
| anti-human FITC-labeled lineage cocktail | BD biosciences | Cat# 340546 |
| PE-labeled CD123 | BD biosciences | mIgG1, clone 9F5 |
| APC-eflour780-labeled HLA-DR | Sigma-Aldrich | mIgG2b, clone LN3 |
| APC-labeled CD11c | BD biosciences | mIgG2b, clone S-HCL-3 |
| Anti-human CD1a | Biolegend | Clone HI149 |
| Anti-human CD11c | BD  eBioscience | Clone S-HCL-3 APC conjugated  Clone 3.9 |
| Anti-human CD14 | AbD Serotec | Clone UCHM1 |
| Anti-human CD15 | Biolegend | Clone HI98 |
| Anti-human panCK | Miltenyi | Clone CK3-6H5 FITC conjugated |
| Anti-human Cytokeratin19 | Abcam | Clone A53-B/A2 |
| Anti-human HLA-DR | Biolegend | Clone LN3 |
| Anti-human proIL1 β | R&D Systems | Clone 615417 |
| **Chemicals, Peptides, and Recombinant Proteins** | | |
| Anakinra | Kineret®, Amgen Inc. |  |
| phorbol 12- myristate 13—acetate (PMA) | Sigma-Aldrich | Cat# p1585 |
| Ionomycin | Sigma-Aldrich | Cat# 10634 |
| TGF-βR kinase inhibitor | EMD Millipore | Cat# 616451 |
| Recombinant protein IL-1β | R&D | Cat# 201-LB/CF |
| Caspase-1 inhibitor (Z-WEHD-FMK) | R&D | Cat# FMK002 |
| GM-CSF | Genzyme | Leukine® (sargramostim) |
| IL-4 | R&D | Cat# 204-IL/CF |
| Fc receptor blocker | Innovex Biosciences | Cat# NB309 |
| Background Buster | Innovex Biosciences | Cat# NB306 |
| PTPRC ViewRNA type 6 probe | Affymetrix | VA6-16447 |
| human IL1β ViewRNA type 1 probe | Affymetrix | VA1-11609 |
| Hyaluronidase | Sigma-Aldrich | Cat# H3506 |
| nab-paclitaxel | Abraxane; Celgene Corporation, Summit, NJ, USA |  |
| Eribulin | Eisai Inc |  |
| Capecitabine | Roche​ |  |
| **Critical Commercial Assays** | | |
| Luminex kit | EMD Millipore |  |
| Caspase-1 activity detection kit | OncoImmunin Inc |  |
| enzyme-linked immunosorbent assays | R&D | Cat# DBP180 |
| CD14 microbeads, human | Miltenyi Biotec | Cat# 130-050-201 |
| Human Pan-DC enrichment kit | EasySep, Stemcell | Cat# 19251 |
| RNase-free DNase | Qiagen | Cat# 79254 |
| iScript™ cDNA Synthesis Kit | Bio-Rad | Cat# 1708841 |
| iTaq SYBR Green Supermix | Bio-Rad | Cat# 172-5121 |
| RNeasy Mini kit | Qiagen | Cat# 74104 |
| QuantiGene ViewRNA ISH tissue assay kit | Affymetrix | Cat# QVT0012 |
| Nanostring nCounter Human Immunology V2 panel | Nanostring Technologies, Inc. |  |
| **Deposited Data** | | |
| TCGA: Invasive Breast Carcinoma | The Cancer Genome Atlas Portal |  |
| METABRIC: breast cancer | Molecular Taxonomy of Breast Cancer International Consortium | Curtis et al, Nature 2012, pubmed id number 22522925 |
| Analyzed Data and Rcode from TCGA and METABRIC | Folder: <ftp://ftp.jax.org/Palucka_Lab/IL1B_study/>  File: <ftp://ftp.jax.org/Palucka_Lab/IL1B_study/supplementary_data.tgz> | Reproducing the figures and tables can be available from the FTP site. |
| Raw data files for Nanostring | This paper |  |
| **Experimental Models: Cell Lines** | | |
| Human: MDA-MB231 | Xenogen | Cat. 92020424-1VL |
| Human: Hs578T | ATCC | Cat. HTB-126 |
| Human: Hs578Bst | ATCC | Cat. HTB-125 |
| **Experimental Models: Organisms/Strains** | | |
| Mouse: NOD.Cg-Prkdc(scid) β2m(tm1Unc)/J | The Jackson Laboratory |  |
| **Software and Algorithms** | | |
| Graphpad Prism | GraphPad, La Jolla, CA |  |
| Imaris | Bitplane |  |
| Flowjo | TreeStar |  |
| R-package pheatmap | Bioconductor site | All the custom scripts used to generate Figures and Tables are provided as supplementary document. |
