# Supplementary material for: IL1 Receptor Antagonist Controls Transcriptional Signature of Inflammation in Patients with Metastatic Breast Cancer
Source: Oxford University Press journal article supplement (doi:10.1158/0008-5472.can-18-0413), 2018-07-16
Supplement: 00085472can180413-sup-196799_2_supp_4727670_p82j1b.docx [file 00085472can180413-sup-196799_2_supp_4727670_p82j1b.docx]

**Table S5. Clinical outcome in clinical trial**

| **Pt ID** | **Chemo Arm** | **Clinical Outcome** | **Survival** |
| --- | --- | --- | --- |
| 01-001 | Nab paclitaxel | NE (ISR) | Deceased |
| 01-002 | Eribulin | PD | Deceased |
| 01-007 | Eribulin | PD | Deceased |
| 02-003 | Eribulin | SD | Deceased |
| 02-004 | Nab paclitaxel | PR | Deceased |
| 02-005 | Capecitabine | SD | Deceased |
| 02-008 | Eribulin | SD | Deceased |
| 02-009 | N/A | PD (before receiving chemo, during 2-week run-in) | Deceased |
| 02-010 | Nab paclitaxel | PR | Alive |
| 02-011 | Capecitabine | SD | Alive |
| 02-012 | Eribulin | NE (ISR) | Alive |
